# Supplementary material for: Nationwide public perceptions regarding the acceptance of using wastewater for community health monitoring in the United States
Source: PLoS One. 2022 Oct 11;17(10):e0275075. doi: 10.1371/journal.pone.0275075 (PMC9553059; doi:10.1371/journal.pone.0275075)
Supplement: S2 File — (XLSX) [file pone.0275075.s002.xlsx]

## Sheet: SewerMonitoringFullDataIinExcel
Q2.1	Q2.1_5_TEXT	Q2.2	Q2.3_1	Q2.3_2	Q2.3_3	Q2.3_4	Q2.3_5	Q2.3_6	Q2.3_6_TEXT	Q2.4	Q2.5	Q2.6	Q2.7	Q2.8	Q3.1_1	Q3.1_2	Q3.1_3	Q3.2_1	Q3.2_2	Q3.2_3	Q3.3_1	Q3.3_2	Q3.3_3	Q3.4_1	Q3.4_2	Q3.4_3	Q3.4_4	Q3.5_1	Q3.5_2	Q3.5_3	Q3.6	Q3.7	Q3.8	Q4.1_1	Q4.1_2	Q4.1_3	Q4.1_4	Q4.1_5	Q4.1_6	Q4.1_7	Q4.1_8	Q4.2_1	Q4.2_2	Q4.2_3	Q4.2_4	Q4.2_5	Q4.2_6	Q4.2_7	Q4.3
3		2	1	1	#NULL!	#NULL!	#NULL!	#NULL!		2	1	4	2	46143	0	0	0	4	4	4	3	3	3	3	3	3	3	2	2	2	#NULL!	1	6	0	0	0	0	0	0	0	1	0	0	0	0	0	0	1	3
2		8	1	#NULL!	#NULL!	#NULL!	#NULL!	#NULL!		2	3	2	2	28226	2	1	2	3	3	3	3	3	3	4	4	4	3	3	3	3	2	2	5	0	0	0	0	0	0	0	1	0	0	0	1	0	0	0	3
2		4	1	#NULL!	#NULL!	#NULL!	#NULL!	#NULL!		2	4	5	1	68521	0	1	0	2	3	1	4	4	3	4	4	3	4	2	2	2	1	4	2	0	0	0	0	0	0	0	1	1	1	1	1	1	1	0	3
2		7	1	#NULL!	#NULL!	#NULL!	#NULL!	#NULL!		2	5	6	2	62010	2	3	3	4	4	4	5	5	5	5	5	5	5	1	1	1	#NULL!	1	1	0	0	0	0	0	0	0	1	0	0	0	1	0	0	0	3
2		7	1	#NULL!	#NULL!	#NULL!	#NULL!	#NULL!		2	2	5	2	33321	0	4	4	4	0	4	5	5	5	5	5	5	5	1	1	1	1	1	6	0	0	0	0	0	0	0	1	0	0	0	1	0	0	0	3
2		7	1	#NULL!	#NULL!	#NULL!	#NULL!	#NULL!		2	4	7	1	57078	2	4	4	4	4	4	3	3	3	5	1	5	1	1	1	1	#NULL!	1	1	0	0	0	0	0	0	0	1	1	1	1	1	1	1	0	3
2		8	1	#NULL!	#NULL!	#NULL!	#NULL!	#NULL!		2	6	10	2	03304	3	3	3	3	3	3	3	3	2	5	4	4	2	1	1	1	#NULL!	2	6	0	0	0	0	0	0	0	1	1	1	1	1	1	1	0	3
2		2	1	#NULL!	#NULL!	#NULL!	#NULL!	#NULL!		2	1	8	2	98642	2	3	2	2	1	1	3	3	3	2	4	4	2	2	2	2	2	3	6	0	0	0	0	0	0	0	1	1	1	1	1	1	1	0	3
2		5	1	#NULL!	#NULL!	#NULL!	#NULL!	#NULL!		2	2	3	1	06854	2	3	2	4	4	4	1	3	3	5	4	5	4	3	3	3	#NULL!	2	2	0	0	0	0	0	0	0	1	0	0	0	1	0	0	0	3
2		7	#NULL!	1	#NULL!	#NULL!	#NULL!	#NULL!		2	5	11	2	40220	3	4	3	4	4	3	4	4	4	5	5	5	5	4	4	4	2	1	6	0	0	0	0	0	0	0	1	0	0	0	0	0	0	1	3
2		8	1	#NULL!	#NULL!	#NULL!	#NULL!	#NULL!		2	2	10	2	45174	3	4	0	4	4	4	4	2	1	3	4	5	2	1	1	1	1	1	5	0	0	0	0	0	0	0	1	0	0	0	0	0	0	1	3
2		4	1	#NULL!	#NULL!	#NULL!	#NULL!	#NULL!		2	3	3	2	33523	0	0	0	1	0	0	3	3	3	3	3	3	3	3	3	3	#NULL!	2	6	0	0	0	0	0	0	0	1	0	0	0	0	0	0	1	3
2		5	1	#NULL!	#NULL!	#NULL!	#NULL!	#NULL!		2	5	12	2	77566	4	4	4	4	4	4	3	4	3	5	5	5	3	2	2	2	2	4	5	0	0	0	0	0	0	0	1	1	0	0	1	0	0	0	3
2		7	1	#NULL!	#NULL!	#NULL!	#NULL!	#NULL!		2	3	8	2	29576	4	4	3	4	4	4	3	3	3	5	5	3	3	3	3	3	#NULL!	2	1	0	0	0	0	0	0	0	1	1	1	1	1	1	1	0	3
2		8	1	#NULL!	#NULL!	#NULL!	#NULL!	#NULL!		2	3	6	2	63301	2	1	2	4	3	3	4	4	3	4	5	5	3	3	3	3	#NULL!	2	5	0	0	0	0	0	0	0	1	0	0	0	0	0	0	1	3
2		3	1	#NULL!	#NULL!	#NULL!	#NULL!	#NULL!		2	2	4	2	18407	3	3	3	4	4	3	3	3	3	5	5	5	3	3	3	3	#NULL!	1	6	0	0	0	0	0	0	0	1	1	1	1	1	0	0	0	3
2		4	1	#NULL!	#NULL!	#NULL!	#NULL!	#NULL!		2	3	4	2	70360	3	4	4	4	4	4	3	4	3	1	1	1	4	5	5	5	1	1	5	0	0	0	0	0	0	0	1	0	0	0	0	0	0	1	3
2		8	1	#NULL!	#NULL!	#NULL!	#NULL!	#NULL!		2	3	5	2	33955	0	0	0	1	0	1	1	5	2	3	3	5	3	3	2	5	#NULL!	1	6	0	0	0	0	0	0	0	1	0	0	0	0	0	0	1	3
2		6	1	#NULL!	#NULL!	#NULL!	#NULL!	#NULL!		2	2	5	2	18062	0	4	0	4	4	2	5	5	3	5	4	5	5	4	4	1	1	1	6	0	0	0	0	0	0	0	1	0	0	0	0	0	0	1	3
2		5	1	#NULL!	#NULL!	#NULL!	#NULL!	#NULL!		2	3	1	1	93277	2	2	2	2	2	2	1	1	3	5	5	5	3	5	4	3	#NULL!	1	6	0	0	0	0	0	0	0	1	0	1	1	0	0	0	0	3
2		6	1	#NULL!	#NULL!	#NULL!	#NULL!	#NULL!		2	3	9	2	60012	3	4	3	2	4	4	4	3	3	4	4	4	3	2	2	2	#NULL!	1	6	0	0	0	0	0	0	0	1	0	0	0	1	0	0	0	3
2		7	1	#NULL!	#NULL!	#NULL!	#NULL!	#NULL!		2	4	3	1	15905	2	3	3	4	4	4	5	5	5	5	5	5	5	1	1	1	#NULL!	4	5	0	0	0	0	0	0	0	1	1	1	1	1	1	1	0	3
2		6	1	#NULL!	#NULL!	#NULL!	#NULL!	#NULL!		2	4	3	1	62208	0	4	4	4	0	4	1	1	1	5	5	5	5	1	1	1	#NULL!	2	5	0	0	0	0	0	0	0	1	0	0	0	0	0	0	1	3
2		3	1	#NULL!	#NULL!	#NULL!	#NULL!	#NULL!		2	3	4	2	34285	1	1	1	4	4	4	3	3	3	3	4	3	3	3	3	3	2	1	6	0	0	0	0	0	0	0	1	0	0	0	1	0	0	0	3
2		7	1	#NULL!	#NULL!	#NULL!	#NULL!	#NULL!		2	3	6	2	02703	1	3	2	3	3	3	3	2	2	5	5	5	4	2	2	2	#NULL!	2	5	0	0	0	0	0	0	0	1	1	1	1	1	0	1	0	3
2		7	1	#NULL!	#NULL!	#NULL!	#NULL!	#NULL!		2	2	3	2	03055	0	3	0	4	2	2	3	3	3	4	4	4	3	3	3	3	#NULL!	1	5	0	0	0	0	0	0	0	1	0	0	0	1	0	0	0	3
2		5	#NULL!	#NULL!	#NULL!	#NULL!	#NULL!	1	hispanic	1	3	4	1	79932	3	1	2	4	0	1	3	3	3	5	5	4	3	3	3	3	#NULL!	1	1	0	0	0	0	0	0	0	1	0	0	0	0	0	0	1	3
2		8	1	#NULL!	#NULL!	#NULL!	#NULL!	#NULL!		2	5	2	2	34685	4	4	4	4	3	4	4	2	1	3	4	4	1	1	1	1	2	3	1	0	0	0	0	0	0	0	1	0	0	0	0	0	0	1	3
2		7	1	#NULL!	#NULL!	#NULL!	#NULL!	#NULL!		2	3	3	2	89104	2	3	0	4	2	2	3	3	3	4	4	4	1	3	3	3	#NULL!	2	5	0	0	0	0	0	0	0	1	1	1	1	1	0	0	0	3
2		6	1	#NULL!	#NULL!	#NULL!	#NULL!	#NULL!		2	4	8	2	60090	0	0	0	0	0	0	5	4	1	5	5	5	1	1	1	1	1	5	5	0	0	0	0	0	0	0	1	0	0	0	1	0	0	0	3
2		7	1	#NULL!	#NULL!	#NULL!	#NULL!	#NULL!		2	5	4	2	78266	4	4	4	4	2	4	1	1	1	4	4	4	1	1	1	3	#NULL!	4	5	0	0	0	0	0	0	0	1	1	1	1	1	1	1	0	3
2		6	#NULL!	#NULL!	#NULL!	#NULL!	#NULL!	1	Mixed races	1	3	7	2	60175	4	4	4	4	4	4	5	5	5	5	5	5	5	3	1	3	2	4	5	0	0	0	0	0	0	0	1	1	1	1	1	1	1	0	3
2		7	#NULL!	1	#NULL!	#NULL!	#NULL!	#NULL!		2	6	10	2	60202	3	3	3	3	3	3	5	5	5	5	5	5	5	3	3	3	2	3	5	0	0	0	0	0	0	0	1	0	1	0	0	0	0	0	3
2		7	1	#NULL!	#NULL!	#NULL!	#NULL!	#NULL!		2	3	4	2	29572	4	4	4	4	4	4	3	3	3	4	4	4	3	3	3	3	#NULL!	2	5	0	0	0	0	0	0	0	1	0	0	0	0	0	0	1	3
2		8	1	#NULL!	#NULL!	#NULL!	#NULL!	#NULL!		2	6	12	2	98020	2	1	3	2	1	1	4	4	4	5	5	5	5	4	3	2	#NULL!	3	4	0	0	0	0	0	0	0	1	0	0	0	1	0	0	0	3
2		6	1	#NULL!	1	#NULL!	#NULL!	#NULL!		2	3	1	1	37210	4	4	4	4	4	4	5	5	5	5	5	5	3	1	1	1	#NULL!	4	1	0	0	0	0	0	0	0	1	1	0	0	1	0	1	0	3
2		7	#NULL!	1	#NULL!	#NULL!	#NULL!	#NULL!		2	6	1	1	94103	2	2	2	4	4	4	3	3	3	3	3	3	3	3	3	3	1	1	1	0	0	0	0	0	0	0	1	1	1	1	1	1	1	0	3
2		4	1	#NULL!	#NULL!	#NULL!	#NULL!	#NULL!		2	3	8	1	56048	2	3	3	3	3	3	5	4	3	5	4	4	3	3	2	2	#NULL!	1	6	0	0	0	0	0	0	0	1	1	1	1	1	1	1	0	3
2		7	1	#NULL!	#NULL!	#NULL!	#NULL!	#NULL!		2	2	2	1	29169	0	2	0	3	3	3	1	1	1	5	5	5	3	1	1	3	#NULL!	1	6	0	0	0	0	0	0	0	1	1	1	1	1	1	1	0	3
2		7	1	#NULL!	#NULL!	#NULL!	#NULL!	#NULL!		2	6	7	1	95128	3	3	0	3	3	2	3	3	3	4	4	4	1	1	1	1	#NULL!	3	2	0	0	0	0	0	0	0	1	1	1	1	1	1	1	0	3
2		6	1	#NULL!	#NULL!	#NULL!	#NULL!	#NULL!		2	2	4	1	34655	2	3	3	3	3	0	4	4	3	4	4	4	3	2	2	2	1	1	1	0	0	0	0	0	0	0	1	1	0	1	0	0	0	0	3
2		7	1	#NULL!	#NULL!	#NULL!	#NULL!	#NULL!		2	6	6	2	63017	4	4	4	4	4	4	2	2	2	2	2	2	2	2	2	2	1	2	5	0	0	0	0	0	0	0	1	1	1	1	1	1	1	0	3
2		6	1	#NULL!	#NULL!	#NULL!	#NULL!	#NULL!		2	4	3	2	98445	0	3	3	3	0	1	4	4	3	5	5	5	3	1	1	1	#NULL!	1	6	0	0	0	0	0	0	0	1	1	1	1	1	1	1	0	3
2		7	1	#NULL!	#NULL!	#NULL!	#NULL!	#NULL!		2	4	4	2	32118	2	3	0	1	1	2	3	3	3	4	4	4	3	3	2	4	#NULL!	3	6	0	0	0	0	0	0	0	1	0	0	0	0	0	0	1	3
2		4	1	#NULL!	#NULL!	#NULL!	#NULL!	#NULL!		2	3	3	2	30236	2	2	2	4	4	2	5	3	3	5	5	5	4	3	2	2	#NULL!	1	6	0	0	0	0	0	0	0	1	0	0	0	1	0	0	0	3
2		8	1	#NULL!	#NULL!	#NULL!	#NULL!	#NULL!		2	6	1	2	27107	3	3	3	4	4	4	5	5	5	4	4	4	1	2	2	2	#NULL!	2	5	0	0	0	0	0	0	0	1	1	1	0	1	0	0	0	3
2		4	1	#NULL!	#NULL!	#NULL!	#NULL!	#NULL!		2	3	12	1	53150	3	3	3	3	3	3	3	3	3	5	5	4	1	1	1	1	#NULL!	1	1	0	0	0	0	0	0	0	1	1	1	0	1	1	1	0	3
2		7	1	#NULL!	#NULL!	#NULL!	#NULL!	#NULL!		2	2	11	2	19002	0	0	0	4	2	2	1	1	1	1	1	1	1	1	1	1	1	1	6	0	0	0	0	0	0	0	1	1	1	1	1	1	1	0	3
2		7	1	#NULL!	#NULL!	#NULL!	#NULL!	#NULL!		2	2	5	2	60540	2	0	0	1	1	1	3	3	3	5	5	5	3	3	3	3	#NULL!	2	1	0	0	0	0	0	0	0	1	0	0	0	1	0	0	0	3
2		6	1	#NULL!	#NULL!	#NULL!	#NULL!	#NULL!		2	4	2	1	53110	4	4	3	3	2	2	3	3	3	4	4	4	3	3	3	3	#NULL!	1	6	0	0	0	0	0	0	0	1	1	0	0	1	0	0	0	3
2		7	1	#NULL!	#NULL!	#NULL!	#NULL!	#NULL!		2	4	6	2	33484	4	4	4	3	3	4	5	5	5	5	5	5	5	3	3	2	#NULL!	4	5	0	0	0	0	0	0	0	1	1	0	0	1	0	0	0	3
2		8	#NULL!	#NULL!	#NULL!	1	#NULL!	#NULL!		2	5	12	2	94708	3	3	3	4	4	3	5	4	4	5	4	4	4	3	2	2	#NULL!	1	6	0	0	0	0	0	0	0	1	0	0	0	1	0	0	0	3
2		6	1	#NULL!	#NULL!	#NULL!	#NULL!	#NULL!		2	3	4	1	68108	4	3	2	4	4	4	5	5	5	5	5	5	5	1	1	1	#NULL!	2	4	0	0	0	0	0	0	0	1	0	0	0	0	0	0	1	3
2		8	1	#NULL!	#NULL!	#NULL!	#NULL!	#NULL!		2	3	6	2	33707	0	2	0	3	1	3	2	2	2	3	4	4	3	1	1	1	1	1	5	0	0	0	0	0	0	0	1	0	0	0	0	1	0	0	3
2		6	1	#NULL!	#NULL!	#NULL!	#NULL!	#NULL!		2	6	9	2	32080	3	3	3	3	3	3	5	5	5	5	5	5	5	5	5	5	1	2	1	0	0	0	0	0	0	0	1	1	0	0	0	0	0	0	3
2		8	1	#NULL!	#NULL!	#NULL!	#NULL!	#NULL!		2	5	6	2	34684	3	3	3	4	4	4	2	2	2	5	4	5	2	2	2	2	#NULL!	3	5	0	0	0	0	0	0	0	1	0	0	0	1	0	0	0	3
2		6	1	#NULL!	#NULL!	#NULL!	#NULL!	#NULL!		2	5	2	2	28215	2	4	3	4	4	4	1	1	1	4	4	4	4	3	3	3	#NULL!	2	5	0	0	0	0	0	0	0	1	0	0	0	0	0	0	1	3
2		7	1	#NULL!	#NULL!	#NULL!	#NULL!	#NULL!		2	2	7	2	75126	3	3	3	3	3	3	5	5	5	5	5	5	5	5	5	5	#NULL!	4	2	0	0	0	0	0	0	0	1	1	1	0	1	0	0	0	3
2		7	1	#NULL!	#NULL!	#NULL!	#NULL!	#NULL!		2	4	5	2	48306	2	3	3	1	1	3	2	2	2	2	2	2	2	2	2	3	#NULL!	1	6	0	0	0	0	0	0	0	1	0	0	0	0	0	0	1	3
2		8	1	#NULL!	#NULL!	#NULL!	#NULL!	#NULL!		2	2	7	2	89005	0	1	1	3	3	3	4	3	4	4	5	5	2	3	2	2	#NULL!	3	5	0	0	0	0	0	0	0	1	0	0	0	0	0	0	1	3
2		7	1	#NULL!	#NULL!	#NULL!	#NULL!	#NULL!		2	3	4	2	89031	3	4	3	4	4	4	5	5	5	5	5	5	5	1	1	1	#NULL!	2	5	0	0	0	0	0	0	0	1	0	0	0	1	0	1	0	3
2		7	1	#NULL!	#NULL!	#NULL!	#NULL!	#NULL!		2	5	1	2	80904	2	2	2	3	3	3	1	1	1	3	3	3	3	3	3	3	1	2	6	0	0	0	0	0	0	0	1	0	0	0	0	0	0	1	3
2		3	1	#NULL!	#NULL!	#NULL!	#NULL!	#NULL!		2	4	8	2	42553	4	4	4	4	4	4	3	3	3	3	3	3	3	1	1	1	1	4	4	0	0	0	0	0	0	0	1	0	0	0	0	0	0	1	3
2		6	1	#NULL!	#NULL!	#NULL!	#NULL!	#NULL!		2	5	4	2	27810	3	4	2	4	3	3	2	2	2	3	3	3	2	2	2	2	2	3	6	0	0	0	0	0	0	0	1	1	0	1	1	0	1	0	3
2		6	1	#NULL!	#NULL!	#NULL!	#NULL!	#NULL!		2	5	10	2	61858	2	3	1	4	3	3	3	2	2	3	3	4	3	2	2	2	#NULL!	1	5	0	0	0	0	0	0	0	1	0	0	0	1	0	0	0	3
2		4	1	#NULL!	#NULL!	#NULL!	#NULL!	#NULL!		2	3	6	2	98640	2	2	2	3	3	2	5	5	4	4	5	4	4	2	2	2	#NULL!	4	6	0	0	0	0	0	0	0	1	1	1	1	1	1	1	0	3
2		7	1	#NULL!	#NULL!	#NULL!	#NULL!	#NULL!		2	3	4	2	15102	4	3	0	4	2	3	5	4	5	5	4	5	3	3	1	1	#NULL!	2	6	0	0	0	0	0	0	0	1	0	0	0	0	0	0	1	3
2		6	1	#NULL!	#NULL!	#NULL!	#NULL!	#NULL!		2	3	6	2	95610	0	2	2	1	0	2	4	4	4	4	4	4	2	2	2	2	#NULL!	5	5	0	0	0	0	0	0	0	1	0	0	0	0	0	0	1	3
2		5	1	#NULL!	#NULL!	#NULL!	#NULL!	#NULL!		2	2	3	2	08234	3	3	3	3	3	3	3	3	3	3	3	3	3	3	3	3	#NULL!	1	1	0	0	0	0	0	0	0	1	0	0	0	0	0	0	1	3
2		7	1	#NULL!	#NULL!	#NULL!	#NULL!	#NULL!		2	2	4	2	40440	0	4	0	4	4	0	4	4	4	4	4	4	4	3	3	4	2	3	6	0	0	0	0	0	0	0	1	1	0	0	0	0	0	0	3
2		4	1	#NULL!	#NULL!	#NULL!	#NULL!	#NULL!		2	2	1	2	48640	2	0	2	2	3	4	1	3	3	3	2	4	5	4	4	4	1	1	2	0	0	0	0	0	0	0	1	0	0	0	0	0	0	1	3
2		4	1	#NULL!	#NULL!	#NULL!	#NULL!	#NULL!		2	5	4	2	37312	2	3	2	2	2	2	3	3	3	3	3	3	3	3	3	3	#NULL!	4	6	0	0	0	0	0	0	0	1	0	0	0	0	0	0	1	3
2		5	#NULL!	1	#NULL!	#NULL!	#NULL!	#NULL!		2	2	2	1	48207	1	4	1	2	1	2	4	4	4	5	4	4	3	4	3	3	#NULL!	4	1	0	0	0	0	0	0	0	1	1	1	1	1	0	1	0	3
2		6	1	#NULL!	#NULL!	#NULL!	#NULL!	#NULL!		2	3	2	2	98001	4	3	1	3	2	3	3	3	3	5	5	5	3	3	2	1	#NULL!	4	5	0	0	0	0	0	0	0	1	1	1	1	1	1	1	0	3
2		5	1	#NULL!	#NULL!	#NULL!	#NULL!	#NULL!		2	5	5	2	80231	2	2	2	4	4	3	1	1	1	5	5	5	3	1	1	1	#NULL!	3	5	0	0	0	0	0	0	0	1	1	0	0	1	1	1	0	3
2		7	1	#NULL!	1	#NULL!	#NULL!	#NULL!		2	6	3	1	34652	3	2	2	4	4	4	3	3	3	4	4	4	4	4	3	4	#NULL!	4	5	0	0	0	0	0	0	0	1	0	0	0	0	0	0	1	3
2		6	1	#NULL!	#NULL!	#NULL!	#NULL!	#NULL!		2	3	8	2	34609	3	4	3	4	4	4	3	3	3	4	4	4	2	3	3	3	1	1	1	0	0	0	0	0	0	0	1	1	1	1	1	1	1	0	3
2		3	1	#NULL!	#NULL!	#NULL!	#NULL!	#NULL!		2	3	2	1	32507	2	2	2	2	3	2	3	4	3	4	4	4	4	4	4	4	2	5	5	0	0	0	0	0	0	0	1	1	1	0	1	0	0	0	3
2		6	1	#NULL!	#NULL!	#NULL!	#NULL!	#NULL!		2	5	11	2	22406	2	4	4	4	4	4	4	4	3	5	5	5	3	2	2	3	1	2	6	0	0	0	0	0	0	0	1	1	1	1	1	1	1	0	3
2		6	1	#NULL!	#NULL!	#NULL!	#NULL!	#NULL!		2	4	4	2	13027	0	2	3	4	2	3	5	5	3	4	3	4	3	3	3	3	#NULL!	1	6	0	0	0	0	0	0	0	1	0	0	0	0	0	0	1	3
2		6	1	#NULL!	#NULL!	#NULL!	#NULL!	#NULL!		2	3	6	2	08210	2	2	2	3	3	3	3	4	4	3	4	4	3	3	3	3	#NULL!	2	5	0	0	0	0	0	0	0	1	0	0	0	1	0	0	0	3
2		5	1	#NULL!	#NULL!	#NULL!	#NULL!	#NULL!		2	3	6	2	30180	3	3	3	3	3	3	4	4	3	5	4	5	4	3	3	3	1	3	6	0	0	0	0	0	0	0	1	0	0	0	0	0	0	1	3
2		5	1	#NULL!	#NULL!	#NULL!	#NULL!	#NULL!		2	6	12	2	66206	2	2	0	1	1	1	3	2	2	5	5	5	5	2	2	2	#NULL!	2	5	0	0	0	0	0	0	0	1	1	1	1	1	1	1	0	3
1		7	1	#NULL!	#NULL!	#NULL!	#NULL!	#NULL!		2	5	6	2	43081	2	3	3	3	3	3	3	3	3	4	4	5	4	3	3	3	#NULL!	2	6	0	0	0	0	0	0	0	1	0	0	0	0	0	0	1	3
1		5	1	#NULL!	#NULL!	#NULL!	#NULL!	#NULL!		2	6	5	2	68137	3	3	3	3	3	2	4	4	3	4	4	4	3	3	3	3	#NULL!	3	6	0	0	0	0	0	0	0	1	0	0	0	0	0	0	1	3
1		6	1	#NULL!	#NULL!	#NULL!	#NULL!	#NULL!		2	5	7	1	46229	1	4	1	4	3	4	1	1	1	1	1	1	1	1	1	1	2	3	5	0	0	0	0	0	0	0	1	0	0	0	0	0	0	1	3
1		7	1	#NULL!	#NULL!	#NULL!	#NULL!	#NULL!		2	4	12	2	08083	3	4	2	4	3	3	2	1	1	4	5	4	3	1	1	1	#NULL!	1	2	0	0	0	0	0	0	0	1	0	0	0	1	0	0	0	3
1		5	1	#NULL!	#NULL!	#NULL!	#NULL!	#NULL!		2	3	11	2	25404	4	4	4	4	4	4	4	2	2	4	4	4	2	2	2	2	#NULL!	2	5	0	0	0	0	0	0	0	1	1	1	1	1	1	1	0	3
1		7	1	#NULL!	#NULL!	#NULL!	#NULL!	#NULL!		2	1	6	2	46037	0	4	4	0	0	0	5	5	5	5	5	5	5	3	3	2	#NULL!	4	5	0	0	0	0	0	0	0	1	0	0	0	0	0	0	1	3
1		7	1	#NULL!	#NULL!	#NULL!	#NULL!	#NULL!		2	5	12	2	91911	3	3	3	4	3	3	5	5	5	5	5	5	5	4	3	3	2	4	5	0	0	0	0	0	0	0	1	1	1	1	1	1	1	0	3
1		6	#NULL!	#NULL!	#NULL!	#NULL!	1	#NULL!		2	2	5	2	32408	4	4	4	4	4	4	2	3	3	4	4	4	4	4	4	2	#NULL!	2	6	0	0	0	0	0	0	0	1	1	1	1	1	0	1	0	3
1		6	1	#NULL!	#NULL!	#NULL!	#NULL!	#NULL!		2	5	10	2	45011	4	3	3	4	4	4	3	3	3	4	4	4	3	2	2	2	#NULL!	1	5	0	0	0	0	0	0	0	1	0	0	0	0	0	0	1	3
1		7	1	#NULL!	#NULL!	#NULL!	#NULL!	#NULL!		2	3	5	2	37923	1	1	3	4	4	4	4	4	2	4	4	4	3	3	3	3	2	5	5	0	0	0	0	0	0	0	1	0	0	0	0	0	0	1	3
1		7	1	#NULL!	#NULL!	#NULL!	#NULL!	#NULL!		2	5	11	1	44108	4	4	3	3	3	4	3	3	3	4	4	4	3	3	3	3	1	1	5	0	0	0	0	0	0	0	1	1	0	0	1	0	1	0	3
1		8	1	#NULL!	#NULL!	#NULL!	#NULL!	#NULL!		2	6	7	2	50021	4	4	3	4	4	4	5	5	5	5	5	5	3	2	1	1	#NULL!	5	5	0	0	0	0	0	0	0	1	1	1	1	1	1	1	0	3
1		7	1	#NULL!	#NULL!	#NULL!	#NULL!	#NULL!		2	6	9	2	39503	3	3	0	4	4	4	3	3	3	5	5	5	3	1	1	1	#NULL!	4	5	0	0	0	0	0	0	0	1	0	0	0	0	0	0	1	3
1		6	1	#NULL!	#NULL!	#NULL!	#NULL!	#NULL!		2	5	12	2	29063	4	4	4	4	4	4	1	1	1	5	5	5	1	1	1	1	2	1	6	0	0	0	0	0	0	0	1	0	0	0	0	0	0	1	3
1		7	1	#NULL!	#NULL!	#NULL!	#NULL!	#NULL!		2	4	4	2	84010	3	3	2	2	2	4	3	3	3	5	5	5	3	1	1	1	#NULL!	1	1	0	0	0	0	0	0	0	1	1	1	1	1	1	1	0	3
1		6	#NULL!	1	#NULL!	#NULL!	#NULL!	#NULL!		2	6	12	2	08020	3	4	1	4	3	3	3	3	4	4	4	4	3	3	2	1	#NULL!	1	5	0	0	0	0	0	0	0	1	0	0	0	0	0	0	1	3
1		7	1	#NULL!	#NULL!	#NULL!	#NULL!	#NULL!		2	4	4	2	62702	3	3	3	3	2	2	1	1	1	3	4	4	1	1	1	1	1	2	6	0	0	0	0	0	0	0	1	0	0	0	1	0	0	0	3
1		7	1	#NULL!	#NULL!	#NULL!	#NULL!	#NULL!		2	2	8	1	77630	3	4	4	3	2	1	3	3	3	4	5	4	3	1	1	1	#NULL!	4	5	0	0	0	0	0	0	0	1	1	1	1	1	1	1	0	3
1		6	1	#NULL!	#NULL!	#NULL!	#NULL!	#NULL!		2	5	12	2	65714	2	2	2	2	2	2	2	2	2	4	4	4	2	2	2	2	#NULL!	3	6	0	0	0	0	0	0	0	1	0	0	0	1	0	0	0	3
1		8	1	#NULL!	#NULL!	#NULL!	#NULL!	#NULL!		2	6	11	2	45069	2	2	2	4	4	4	5	5	3	5	5	5	3	4	4	3	1	2	5	0	0	0	0	0	0	0	1	1	1	1	1	1	1	0	3
1		7	1	#NULL!	#NULL!	#NULL!	#NULL!	#NULL!		2	3	3	2	68847	4	4	3	4	4	4	1	3	3	3	4	4	2	1	1	1	1	4	5	0	0	0	0	0	0	0	1	1	1	1	1	1	1	0	3
1		7	1	#NULL!	#NULL!	#NULL!	#NULL!	#NULL!		2	6	7	2	16801	3	4	3	4	4	4	5	5	5	5	5	5	4	5	4	3	2	3	5	0	0	0	0	0	0	0	1	1	0	0	1	0	0	0	3
1		4	1	#NULL!	#NULL!	#NULL!	#NULL!	#NULL!		2	3	11	1	86004	2	2	3	3	2	3	3	3	3	3	4	4	3	3	3	3	#NULL!	2	4	0	0	0	0	0	0	0	1	0	0	0	0	0	0	1	3
1		4	#NULL!	#NULL!	#NULL!	#NULL!	1	#NULL!		2	3	2	1	66502	0	0	0	1	0	0	3	3	3	4	4	5	4	3	3	3	#NULL!	1	5	0	0	0	0	0	0	0	1	0	0	0	0	0	0	1	3
1		7	#NULL!	1	#NULL!	#NULL!	#NULL!	#NULL!		2	4	8	2	30016	3	3	3	2	1	2	3	5	3	4	3	3	3	4	4	5	#NULL!	1	6	0	0	0	0	0	0	0	1	1	0	0	0	0	0	0	3
1		8	1	#NULL!	#NULL!	#NULL!	#NULL!	#NULL!		2	2	2	2	16508	2	4	4	4	4	4	3	4	4	3	5	5	3	3	3	5	#NULL!	1	6	0	0	0	0	0	0	0	1	0	0	0	0	0	0	1	3
1		8	1	#NULL!	#NULL!	#NULL!	#NULL!	#NULL!		2	6	6	2	94566	3	2	0	3	3	2	3	3	3	4	4	4	3	3	1	3	#NULL!	3	5	0	0	0	0	0	0	0	1	1	1	1	1	1	1	0	3
1		6	1	#NULL!	#NULL!	#NULL!	#NULL!	#NULL!		2	3	10	2	11953	2	2	2	2	2	3	4	3	3	4	4	4	1	1	1	1	#NULL!	2	5	0	0	0	0	0	0	0	1	0	0	0	1	0	0	0	3
1		7	1	#NULL!	#NULL!	#NULL!	#NULL!	#NULL!		2	5	5	2	78633	0	3	3	3	3	3	4	4	3	4	3	4	3	3	2	1	#NULL!	2	6	0	0	0	0	0	0	0	1	0	0	0	1	0	0	0	3
1		9	1	#NULL!	#NULL!	#NULL!	#NULL!	#NULL!		2	2	8	1	83704	1	0	0	2	1	0	3	3	3	3	3	3	3	3	3	3	#NULL!	4	5	0	0	0	0	0	0	0	1	0	0	0	0	1	0	0	3
1		7	1	#NULL!	#NULL!	#NULL!	#NULL!	#NULL!		2	6	6	1	32829	0	0	0	0	0	0	1	1	1	1	1	1	1	1	1	1	#NULL!	4	2	0	0	0	0	0	0	0	1	0	0	0	0	0	0	1	3
1		6	1	#NULL!	#NULL!	#NULL!	#NULL!	#NULL!		2	2	8	2	28110	0	3	0	4	4	4	3	3	3	4	3	4	3	3	3	3	#NULL!	4	6	0	0	0	0	0	0	0	1	0	0	1	0	0	0	0	3
1		7	1	#NULL!	#NULL!	#NULL!	#NULL!	#NULL!		2	3	10	2	97060	2	3	3	2	2	2	3	3	3	3	3	3	3	3	3	3	#NULL!	1	5	0	0	0	0	0	0	0	1	1	1	1	1	1	1	0	3
1		6	#NULL!	1	#NULL!	#NULL!	#NULL!	#NULL!		2	5	3	2	12306	3	3	3	3	3	3	3	3	3	4	3	3	3	2	2	2	#NULL!	3	5	0	0	0	0	0	0	0	1	0	0	0	1	0	0	0	3
1		6	1	#NULL!	#NULL!	#NULL!	#NULL!	#NULL!		2	3	6	2	15642	2	2	0	3	2	2	4	3	3	4	5	4	1	1	1	1	2	4	5	0	0	0	0	0	0	0	1	1	1	1	1	1	1	0	3
1		6	1	#NULL!	#NULL!	#NULL!	#NULL!	#NULL!		2	7	11	2	12182	4	4	4	4	1	4	1	1	1	4	5	4	1	1	1	1	#NULL!	1	6	0	0	0	0	0	0	0	1	1	1	1	1	1	1	0	3
1		7	#NULL!	#NULL!	#NULL!	1	#NULL!	1	Asian American	2	5	7	2	96822	3	3	3	3	3	3	3	3	3	5	5	5	4	4	4	4	#NULL!	1	5	0	0	0	0	0	0	0	1	0	0	0	1	0	0	0	3
1	I don’t “identify” as ANY gender. I was born a male, I am a normal male who enjoys my wife.	6	1	#NULL!	#NULL!	#NULL!	#NULL!	#NULL!		2	5	11	2	33983	3	3	3	4	4	4	5	5	1	5	5	5	1	1	1	1	#NULL!	4	1	0	0	0	0	0	0	0	1	0	0	0	0	0	0	1	3
3		6	#NULL!	1	#NULL!	#NULL!	#NULL!	#NULL!		2	7	12	2	53147	4	4	4	4	4	4	5	5	3	5	5	5	3	5	3	3	1	4	1	0	0	0	0	0	0	0	1	1	1	1	1	1	1	0	3
3		3	#NULL!	#NULL!	#NULL!	#NULL!	#NULL!	1	Prefer Not to Answer	2	3	1	2	48091	4	4	4	4	4	4	3	1	1	5	5	5	5	1	1	1	2	3	6	0	0	0	0	0	0	0	1	1	1	1	1	1	1	0	3
2		4	#NULL!	1	#NULL!	#NULL!	#NULL!	#NULL!		2	2	3	1	77060	0	2	0	3	3	2	3	3	3	3	3	3	3	3	3	3	#NULL!	1	6	0	0	0	0	0	0	0	1	1	1	1	1	1	1	0	3
2		2	#NULL!	1	#NULL!	#NULL!	#NULL!	#NULL!		2	2	7	1	30153	0	0	0	0	0	0	1	1	3	1	1	1	1	1	1	5	#NULL!	4	6	0	0	0	0	0	0	0	1	0	0	0	1	0	1	0	3
2		5	1	#NULL!	#NULL!	#NULL!	#NULL!	#NULL!		1	2	3	1	76273	0	3	0	4	4	4	3	3	1	5	5	5	5	2	1	1	1	1	1	0	0	0	0	0	0	0	1	1	1	1	1	1	1	0	3
2		4	1	#NULL!	#NULL!	#NULL!	#NULL!	#NULL!		2	3	8	1	23605	3	1	3	2	2	2	1	1	1	5	5	5	1	1	1	1	#NULL!	5	6	0	0	0	0	0	0	0	1	1	1	1	1	1	1	0	3
2		4	1	#NULL!	#NULL!	#NULL!	#NULL!	#NULL!		2	4	5	2	46706	3	3	3	4	4	4	3	4	3	5	5	5	3	5	1	4	#NULL!	1	6	0	0	0	0	0	0	0	1	0	1	1	0	0	1	0	3
2		5	1	#NULL!	#NULL!	#NULL!	#NULL!	#NULL!		2	1	3	1	12078	2	3	2	4	4	4	3	3	2	5	5	5	3	5	2	2	#NULL!	2	2	0	0	0	0	0	0	0	1	0	0	0	1	0	0	0	3
2		6	1	#NULL!	#NULL!	#NULL!	#NULL!	#NULL!		2	2	4	1	24541	4	4	4	3	3	3	5	5	2	5	5	5	5	5	5	5	#NULL!	4	6	0	0	0	0	0	0	0	1	0	0	0	0	0	0	1	3
2		6	1	#NULL!	#NULL!	#NULL!	#NULL!	#NULL!		2	5	3	2	92054	4	4	4	4	4	4	4	4	4	4	4	4	3	2	2	2	#NULL!	1	4	0	0	0	0	0	0	0	1	0	0	0	0	0	0	1	3
2		8	1	#NULL!	#NULL!	#NULL!	#NULL!	#NULL!		2	3	4	2	78728	4	4	4	4	4	4	1	1	1	5	5	5	1	1	1	1	2	1	5	0	0	0	0	0	0	0	1	1	1	1	1	1	1	0	3
2		6	1	#NULL!	#NULL!	#NULL!	#NULL!	#NULL!		2	3	2	2	98362	2	4	2	3	4	2	4	3	4	4	3	4	3	3	3	3	#NULL!	5	6	0	0	0	0	0	0	0	1	1	0	0	1	0	1	0	3
2		4	1	#NULL!	#NULL!	#NULL!	#NULL!	#NULL!		2	3	4	2	83687	3	3	3	4	4	4	1	1	1	4	5	5	1	1	1	1	#NULL!	1	6	0	0	0	0	0	0	0	1	0	0	0	0	0	0	1	3
2		8	1	#NULL!	#NULL!	#NULL!	#NULL!	#NULL!		2	1	2	1	62521	0	0	4	4	4	0	1	5	1	3	3	5	1	3	4	4	#NULL!	1	5	0	0	0	0	0	0	0	1	0	0	0	0	0	0	1	3
2		6	1	#NULL!	#NULL!	#NULL!	#NULL!	#NULL!		2	3	12	2	38305	0	2	3	4	4	0	5	5	3	5	5	5	4	2	2	2	#NULL!	3	6	0	0	0	0	0	0	0	1	1	1	1	1	1	1	0	3
2		8	1	#NULL!	#NULL!	#NULL!	#NULL!	#NULL!		2	6	12	2	77024	4	4	3	4	3	4	2	2	2	4	4	4	2	2	2	2	#NULL!	3	5	0	0	0	0	0	0	0	1	0	0	0	1	0	0	0	3
2		6	1	#NULL!	#NULL!	#NULL!	#NULL!	#NULL!		2	5	6	2	46254	2	2	2	4	3	3	3	3	3	4	4	5	1	3	1	1	2	3	6	0	0	0	0	0	0	0	1	0	0	0	1	0	0	0	3
2		3	1	#NULL!	#NULL!	#NULL!	#NULL!	#NULL!		2	2	5	1	83301	0	0	2	3	3	3	3	3	3	3	3	3	3	3	3	3	#NULL!	2	6	0	0	0	0	0	0	0	1	1	1	1	1	1	1	0	3
2		7	1	#NULL!	#NULL!	#NULL!	#NULL!	#NULL!		2	2	2	2	06716	3	2	2	3	3	3	2	2	2	2	2	3	2	3	3	3	#NULL!	1	6	0	0	0	0	0	0	0	1	0	0	0	0	0	0	1	3
2		8	1	#NULL!	#NULL!	#NULL!	#NULL!	#NULL!		2	3	10	2	92021	2	3	3	4	4	4	1	4	3	5	5	5	5	3	3	4	#NULL!	4	6	0	0	0	0	0	0	0	1	0	0	0	0	0	0	1	3
2		7	#NULL!	#NULL!	#NULL!	1	#NULL!	#NULL!		2	3	6	2	27295	0	2	0	2	2	2	2	2	2	3	4	4	3	3	3	2	#NULL!	1	5	0	0	0	0	0	0	0	1	0	0	0	1	0	0	0	3
2		6	1	#NULL!	#NULL!	#NULL!	#NULL!	#NULL!		2	2	4	1	47714	4	4	4	4	4	4	5	5	5	4	4	4	3	3	3	3	#NULL!	5	6	0	0	0	0	0	0	0	1	1	1	1	1	1	1	0	3
2		7	1	#NULL!	#NULL!	#NULL!	#NULL!	#NULL!		2	5	9	2	86429	3	4	2	4	4	3	4	3	2	4	4	4	3	2	2	2	2	3	5	0	0	0	0	0	0	0	1	0	0	0	0	0	0	1	3
2		3	1	#NULL!	#NULL!	#NULL!	#NULL!	#NULL!		2	5	9	2	52404	2	2	2	2	2	2	2	2	2	4	3	4	3	3	3	3	2	3	5	0	0	0	0	0	0	0	1	0	0	0	0	0	0	1	3
2		5	#NULL!	#NULL!	#NULL!	#NULL!	#NULL!	1	American	2	5	4	2	10954	1	1	1	1	1	1	4	4	4	4	4	4	3	3	3	3	#NULL!	4	6	0	0	0	0	0	0	0	1	0	0	0	1	0	0	0	3
2		7	1	#NULL!	#NULL!	#NULL!	#NULL!	#NULL!		2	6	10	2	22025	3	4	3	4	4	4	4	4	4	4	4	4	4	3	3	3	#NULL!	3	5	0	0	0	0	0	0	0	1	0	0	0	0	0	0	1	3
2		7	1	#NULL!	#NULL!	#NULL!	#NULL!	#NULL!		2	2	7	2	33903	0	3	0	4	4	4	4	3	1	5	4	5	2	1	1	1	#NULL!	4	5	0	0	0	0	0	0	0	1	0	0	0	1	0	1	0	3
2		7	1	#NULL!	#NULL!	#NULL!	#NULL!	#NULL!		2	6	12	2	23113	2	3	3	3	3	3	4	4	4	4	4	4	4	3	3	3	#NULL!	1	6	0	0	0	0	0	0	0	1	0	0	0	1	0	0	0	3
2		6	1	#NULL!	#NULL!	#NULL!	#NULL!	#NULL!		2	4	3	2	19720	2	2	1	4	4	3	3	3	3	5	5	5	3	1	1	1	#NULL!	1	6	0	0	0	0	0	0	0	1	1	1	1	1	1	1	0	3
2		7	1	#NULL!	#NULL!	#NULL!	#NULL!	#NULL!		2	2	5	2	23321	0	4	0	3	3	0	3	3	3	4	4	4	3	2	2	2	1	1	5	0	0	0	0	0	0	0	1	1	0	0	1	0	0	0	3
2		7	1	#NULL!	#NULL!	#NULL!	#NULL!	#NULL!		2	6	3	2	17403	2	2	1	4	4	2	4	4	3	5	5	5	4	2	2	2	#NULL!	2	5	0	0	0	0	0	0	0	1	1	1	1	1	1	1	0	3
2		4	#NULL!	#NULL!	1	#NULL!	#NULL!	#NULL!		1	5	5	2	02703	4	4	4	4	4	4	5	5	5	5	5	5	4	5	4	5	1	5	5	0	0	0	0	0	0	0	1	1	1	1	1	1	1	0	3
2		8	1	#NULL!	#NULL!	#NULL!	#NULL!	#NULL!		2	6	10	2	32162	1	3	1	3	1	1	1	1	1	1	4	1	1	1	1	1	2	1	6	0	0	0	0	0	0	0	1	0	1	1	1	1	1	0	3
2		5	1	#NULL!	#NULL!	#NULL!	#NULL!	#NULL!		2	3	6	2	52722	1	1	1	3	3	1	3	3	3	5	5	5	3	2	2	2	#NULL!	1	6	0	0	0	0	0	0	0	1	1	1	1	1	1	1	0	3
2		5	1	#NULL!	#NULL!	#NULL!	#NULL!	#NULL!		2	3	9	2	29615	1	1	1	3	3	2	4	4	3	4	4	4	3	3	3	3	#NULL!	2	6	0	0	0	0	0	0	0	1	1	1	1	1	1	1	0	3
2		4	1	#NULL!	#NULL!	#NULL!	#NULL!	#NULL!		2	6	11	2	27012	4	3	0	4	4	4	3	3	3	4	5	5	3	3	3	3	#NULL!	1	5	0	0	0	0	0	0	0	1	1	1	1	1	1	1	0	3
2		4	1	#NULL!	#NULL!	#NULL!	#NULL!	#NULL!		2	3	8	2	14618	0	0	0	2	2	0	3	3	2	4	4	4	4	4	3	3	1	1	6	0	0	0	0	0	0	0	1	0	0	0	1	0	0	0	3
2		4	1	#NULL!	1	#NULL!	#NULL!	#NULL!		2	2	4	1	54703	2	3	1	3	3	3	5	5	3	5	5	5	4	1	1	1	2	2	6	0	0	0	0	0	0	0	1	0	0	0	0	0	0	1	3
2		5	1	#NULL!	#NULL!	#NULL!	#NULL!	#NULL!		2	5	11	2	53066	2	4	4	4	3	4	4	4	3	5	5	5	3	1	1	1	#NULL!	3	5	0	0	0	0	0	0	0	1	1	1	1	1	1	1	0	3
2		8	1	#NULL!	#NULL!	#NULL!	#NULL!	#NULL!		2	5	4	2	32176	2	4	3	4	4	4	4	5	4	4	5	4	3	3	3	3	#NULL!	2	5	0	0	0	0	0	0	0	1	0	0	0	1	0	0	0	3
2		7	1	#NULL!	#NULL!	#NULL!	#NULL!	#NULL!		2	4	5	2	19061	0	0	0	2	0	0	2	2	2	4	4	3	1	1	1	1	#NULL!	1	5	0	0	0	0	0	0	0	1	1	1	1	1	1	1	0	3
2		8	1	#NULL!	#NULL!	#NULL!	#NULL!	#NULL!		2	3	6	2	34203	4	4	4	4	4	4	4	3	3	5	5	5	5	3	3	3	#NULL!	1	5	0	0	0	0	0	0	0	1	1	1	1	1	1	1	0	3
2		8	1	#NULL!	#NULL!	#NULL!	#NULL!	#NULL!		2	5	6	1	90680	0	2	2	2	2	2	5	5	5	4	4	5	4	1	1	1	1	1	1	0	0	0	0	0	0	0	1	1	1	1	1	0	1	0	3
2		5	1	#NULL!	#NULL!	#NULL!	#NULL!	#NULL!		2	3	1	1	86442	3	2	1	3	2	1	4	4	4	4	4	4	4	4	4	4	#NULL!	1	5	0	0	0	0	0	0	0	1	0	0	0	0	0	0	1	3
2		5	1	#NULL!	#NULL!	#NULL!	#NULL!	#NULL!		2	2	10	2	30461	2	3	3	4	4	4	3	3	3	3	3	3	3	3	3	3	#NULL!	1	1	0	0	0	0	0	0	0	1	1	1	1	1	1	1	0	3
2		3	#NULL!	1	#NULL!	#NULL!	#NULL!	#NULL!		2	3	3	1	21225	0	2	2	4	4	3	3	3	3	5	5	5	5	2	4	4	#NULL!	2	6	0	0	0	0	0	0	0	1	1	1	1	1	1	1	0	3
2		6	1	#NULL!	#NULL!	#NULL!	#NULL!	#NULL!		2	5	9	2	49341	4	4	4	4	3	3	5	3	3	5	5	5	4	2	2	2	#NULL!	2	5	0	0	0	0	0	0	0	1	0	0	0	0	0	0	1	3
2		7	1	#NULL!	#NULL!	#NULL!	#NULL!	#NULL!		2	6	9	2	30265	3	3	3	3	3	3	4	1	1	4	4	4	1	1	1	1	#NULL!	4	5	0	0	0	0	0	0	0	1	0	0	0	0	0	0	1	3
2		6	1	#NULL!	#NULL!	#NULL!	#NULL!	#NULL!		2	3	6	2	75044	1	1	0	2	2	2	3	2	2	3	4	3	2	1	1	1	#NULL!	4	5	0	0	0	0	0	0	0	1	1	1	1	1	1	1	0	3
2		4	1	#NULL!	#NULL!	#NULL!	#NULL!	#NULL!		2	4	7	2	55437	2	3	3	3	3	3	3	4	3	4	4	4	3	2	2	2	#NULL!	3	5	0	0	0	0	0	0	0	1	1	1	1	1	1	1	0	3
2		7	1	#NULL!	#NULL!	#NULL!	#NULL!	#NULL!		2	5	9	2	60014	2	3	1	4	3	3	5	5	4	5	5	5	5	2	2	5	#NULL!	4	6	0	0	0	0	0	0	0	1	1	1	1	1	1	1	0	3
2		7	1	#NULL!	#NULL!	#NULL!	#NULL!	#NULL!		2	2	11	2	02062	3	4	4	4	4	4	1	5	3	5	5	5	5	1	1	1	2	1	5	0	0	0	0	0	0	0	1	0	0	0	0	0	0	1	3
2		5	1	#NULL!	#NULL!	#NULL!	#NULL!	#NULL!		2	5	8	1	68522	1	1	0	4	4	3	3	3	3	4	4	4	3	2	2	2	#NULL!	1	2	0	0	0	0	0	0	0	1	0	0	0	1	0	0	0	3
2		8	1	#NULL!	#NULL!	#NULL!	#NULL!	#NULL!		2	3	11	1	20904	3	3	0	4	3	3	5	5	5	5	5	5	2	1	1	1	#NULL!	4	5	0	0	0	0	0	0	0	1	0	0	0	0	1	0	0	3
2		6	1	#NULL!	#NULL!	#NULL!	#NULL!	#NULL!		2	5	2	1	77076	3	3	2	0	2	2	1	1	1	1	1	1	1	1	1	1	2	4	6	0	0	0	0	0	0	0	1	1	1	1	1	1	1	0	3
2		5	1	#NULL!	#NULL!	#NULL!	#NULL!	#NULL!		2	2	6	2	02780	0	1	0	3	2	0	4	3	3	4	4	4	4	4	3	2	1	2	1	0	0	0	0	0	0	0	1	0	0	0	1	0	1	0	3
2		6	1	#NULL!	#NULL!	#NULL!	#NULL!	#NULL!		2	3	10	2	65584	3	4	1	2	2	1	4	3	2	5	5	5	3	3	3	3	#NULL!	1	5	0	0	0	0	0	0	0	1	0	0	0	1	0	0	0	3
2		6	1	#NULL!	#NULL!	#NULL!	#NULL!	#NULL!		2	5	2	1	75228	2	2	0	4	4	4	3	3	3	5	5	5	3	4	1	1	1	2	6	0	0	0	0	0	0	0	1	1	1	1	0	1	1	0	3
2		8	1	#NULL!	#NULL!	#NULL!	#NULL!	#NULL!		2	2	5	2	60050	4	4	0	4	4	4	3	4	3	5	4	4	3	5	5	5	#NULL!	1	6	0	0	0	0	0	0	0	1	0	0	0	0	1	0	0	3
2		6	1	#NULL!	1	#NULL!	#NULL!	#NULL!		2	3	8	1	95401	1	1	0	3	2	1	3	3	3	5	4	5	4	3	3	2	2	3	6	0	0	0	0	0	0	0	1	1	0	0	1	0	0	0	3
2		5	1	#NULL!	#NULL!	#NULL!	#NULL!	#NULL!		2	3	5	2	50111	3	3	3	3	3	3	4	3	3	5	5	5	5	4	4	4	#NULL!	1	6	0	0	0	0	0	0	0	1	1	1	1	1	1	1	0	3
2		4	#NULL!	1	#NULL!	#NULL!	#NULL!	#NULL!		2	5	2	1	42301	1	1	1	2	3	3	3	3	3	4	4	4	4	4	4	4	#NULL!	2	6	0	0	0	0	0	0	0	1	0	0	0	1	0	0	0	3
2		7	#NULL!	1	#NULL!	#NULL!	#NULL!	#NULL!		2	6	8	2	89052	4	4	4	4	4	4	3	3	3	4	4	4	1	1	1	1	2	3	2	0	0	0	0	0	0	0	1	0	0	0	1	0	1	0	3
2		4	1	#NULL!	#NULL!	#NULL!	#NULL!	#NULL!		2	3	7	2	50707	2	3	3	3	3	3	1	1	1	4	4	4	1	1	1	1	#NULL!	4	5	0	0	0	0	0	0	0	1	1	1	1	1	1	1	0	3
2		5	1	#NULL!	#NULL!	#NULL!	#NULL!	#NULL!		2	5	9	2	48446	0	1	0	1	1	1	2	2	2	2	2	2	2	1	1	1	#NULL!	4	6	0	0	0	0	0	0	0	1	1	1	1	1	1	1	0	3
2		5	1	#NULL!	#NULL!	#NULL!	#NULL!	#NULL!		2	3	9	2	60914	2	3	3	4	4	3	5	5	5	5	5	5	5	2	2	1	#NULL!	2	6	0	0	0	0	0	0	0	1	1	1	1	1	1	1	0	3
2		4	1	#NULL!	#NULL!	#NULL!	#NULL!	#NULL!		2	2	1	2	80911	2	3	2	3	3	3	3	3	3	3	4	4	3	4	4	3	#NULL!	4	1	0	0	0	0	0	0	0	1	1	1	1	1	1	1	0	3
2		6	1	#NULL!	#NULL!	#NULL!	#NULL!	#NULL!		2	6	8	2	63042	3	3	3	3	3	3	4	4	3	4	4	4	3	1	3	2	#NULL!	3	5	0	0	0	0	0	0	0	1	1	1	1	1	0	1	0	3
2		6	#NULL!	#NULL!	1	#NULL!	#NULL!	#NULL!		1	3	4	2	74804	4	4	4	4	4	4	5	5	5	5	5	5	5	5	3	3	#NULL!	3	6	0	0	0	0	0	0	0	1	0	0	0	0	0	0	1	3
2		5	#NULL!	#NULL!	#NULL!	#NULL!	#NULL!	1		2	4	8	2	27822	2	2	2	4	3	0	3	3	3	4	4	5	3	3	3	3	#NULL!	1	6	0	0	0	0	0	0	0	1	0	0	0	0	0	0	1	3
2		6	1	#NULL!	#NULL!	#NULL!	#NULL!	#NULL!		2	5	8	2	60048	0	3	0	0	0	0	2	2	2	3	3	3	3	4	4	5	#NULL!	3	2	0	0	0	0	0	0	0	1	0	0	0	0	0	0	1	3
2		6	1	#NULL!	#NULL!	#NULL!	#NULL!	#NULL!		2	4	2	2	29346	3	3	3	4	3	3	1	1	1	4	4	4	3	1	1	1	#NULL!	1	5	0	0	0	0	0	0	0	1	0	0	0	1	0	1	0	3
2		4	1	#NULL!	#NULL!	#NULL!	#NULL!	#NULL!		2	5	9	2	83642	4	4	4	4	4	4	1	1	1	1	5	3	1	1	1	1	2	3	5	0	0	0	0	0	0	0	1	1	1	1	1	1	1	0	3
2		4	#NULL!	#NULL!	#NULL!	1	#NULL!	#NULL!		2	6	7	2	96797	0	2	0	2	0	0	3	3	3	4	4	4	3	3	3	3	#NULL!	3	6	0	0	0	0	0	0	0	1	0	0	0	1	0	0	0	3
2		5	1	#NULL!	#NULL!	#NULL!	#NULL!	#NULL!		2	6	11	1	94509	2	2	1	3	3	3	4	4	3	4	4	4	4	3	3	3	1	1	1	0	0	0	0	0	0	0	1	1	1	0	1	0	1	0	3
2		6	1	#NULL!	#NULL!	#NULL!	#NULL!	#NULL!		2	5	7	1	20904	0	0	0	4	4	4	5	1	1	5	1	5	1	1	1	1	2	3	5	0	0	0	0	0	0	0	1	1	1	1	1	1	1	0	3
2		6	1	#NULL!	#NULL!	#NULL!	#NULL!	#NULL!		2	4	5	2	37086	2	3	3	4	4	4	5	5	5	5	5	5	5	2	2	2	#NULL!	1	6	0	0	0	0	0	0	0	1	0	0	0	0	0	0	1	3
2		6	1	#NULL!	#NULL!	#NULL!	#NULL!	#NULL!		2	3	12	2	60449	2	2	2	3	3	3	3	3	3	4	4	4	2	4	3	3	#NULL!	4	5	0	0	0	0	0	0	0	1	0	0	0	1	0	0	0	3
2		6	1	#NULL!	#NULL!	#NULL!	#NULL!	#NULL!		2	5	5	2	02576	2	3	3	4	4	4	4	2	2	5	4	4	3	1	1	1	#NULL!	5	6	0	0	0	0	0	0	0	1	0	0	0	0	0	0	1	3
2		6	1	#NULL!	#NULL!	#NULL!	#NULL!	#NULL!		2	5	5	2	29576	2	2	2	4	4	4	3	3	4	3	4	4	4	1	1	3	#NULL!	1	2	0	0	0	0	0	0	0	1	1	1	1	1	1	1	0	3
2		4	#NULL!	1	#NULL!	#NULL!	#NULL!	#NULL!		2	2	2	1	39074	1	3	2	3	3	1	3	3	3	5	5	5	5	4	1	1	#NULL!	2	5	0	0	0	0	0	0	0	1	1	1	1	1	1	1	0	3
2		8	1	#NULL!	#NULL!	#NULL!	#NULL!	#NULL!		2	6	11	2	68164	2	4	1	3	3	2	3	3	3	5	4	5	4	3	3	4	#NULL!	3	5	0	0	0	0	0	0	0	1	0	0	0	1	0	0	0	3
2		5	1	#NULL!	1	#NULL!	#NULL!	#NULL!		2	7	11	2	76522	3	3	3	3	3	3	4	4	4	1	3	1	1	1	1	1	#NULL!	4	5	0	0	0	0	0	0	0	1	1	1	1	1	1	1	0	3
2		5	1	#NULL!	#NULL!	#NULL!	#NULL!	#NULL!		2	5	5	2	72088	2	1	0	4	4	4	4	4	3	5	5	5	3	1	1	3	#NULL!	3	6	0	0	0	0	0	0	0	1	0	1	0	1	0	1	0	3
2		6	1	#NULL!	#NULL!	#NULL!	#NULL!	#NULL!		1	6	7	1	79416	0	1	1	4	3	4	3	3	3	4	4	4	3	3	3	2	#NULL!	2	5	0	0	0	0	0	0	0	1	0	0	0	0	0	0	1	3
2		4	1	#NULL!	#NULL!	#NULL!	#NULL!	#NULL!		2	2	4	2	63010	0	2	2	2	2	2	3	3	3	3	3	3	3	3	3	3	#NULL!	4	6	0	0	0	0	0	0	0	1	0	0	0	0	0	0	1	3
2		4	1	#NULL!	#NULL!	1	#NULL!	#NULL!		2	4	5	2	85308	1	3	1	3	3	1	1	1	1	5	5	3	1	3	2	2	#NULL!	4	5	0	0	0	0	0	0	0	1	1	0	0	1	0	0	0	3
2		6	1	#NULL!	1	#NULL!	#NULL!	#NULL!		2	4	3	1	43202	1	3	2	4	4	2	3	3	3	4	4	4	3	3	3	3	#NULL!	1	1	0	0	0	0	0	0	0	1	1	1	1	1	0	1	0	3
2		7	1	#NULL!	#NULL!	#NULL!	#NULL!	#NULL!		2	3	3	2	53051	0	2	0	1	1	1	4	4	3	3	4	4	3	2	2	2	1	4	5	0	0	0	0	0	0	0	1	0	0	0	0	1	0	0	3
2		7	1	#NULL!	#NULL!	#NULL!	#NULL!	#NULL!		2	4	4	1	32839	4	4	4	4	4	4	1	2	2	5	4	5	2	1	1	1	2	3	6	0	0	0	0	0	0	0	1	1	1	1	1	1	1	0	3
2		5	1	#NULL!	#NULL!	#NULL!	#NULL!	#NULL!		2	2	3	1	67401	2	3	0	4	4	2	3	3	3	5	5	5	2	3	1	1	2	4	5	0	0	0	0	0	0	0	1	1	0	0	1	0	0	0	3
2		5	1	#NULL!	#NULL!	#NULL!	#NULL!	#NULL!		2	3	2	2	54303	3	3	3	3	3	3	1	4	1	3	5	5	2	1	1	1	1	2	2	0	0	0	0	0	0	0	1	1	0	0	1	0	1	0	3
2		5	1	#NULL!	#NULL!	#NULL!	#NULL!	#NULL!		2	2	3	1	73501	4	4	4	4	3	2	3	3	3	3	5	3	3	2	2	3	2	3	2	0	0	0	0	0	0	0	1	0	0	0	1	0	0	0	3
2		7	1	#NULL!	#NULL!	#NULL!	#NULL!	#NULL!		2	3	11	2	14052	2	4	2	4	4	4	2	2	2	4	4	4	3	2	3	2	#NULL!	3	2	0	0	0	0	0	0	0	1	0	0	0	0	1	0	0	3
2		7	1	#NULL!	#NULL!	#NULL!	#NULL!	#NULL!		2	2	10	2	08028	3	3	0	4	0	4	1	1	1	5	5	3	1	1	1	1	#NULL!	4	5	0	0	0	0	0	0	0	1	1	1	1	1	1	1	0	3
2		6	1	#NULL!	#NULL!	#NULL!	#NULL!	#NULL!		2	3	9	2	15642	2	3	2	3	3	2	4	4	3	2	4	4	3	3	3	3	#NULL!	2	5	0	0	0	0	0	0	0	1	0	0	0	0	0	0	1	3
2		3	#NULL!	#NULL!	#NULL!	1	#NULL!	#NULL!		2	5	8	2	90089	3	4	3	4	3	3	3	3	3	3	3	3	2	3	3	3	#NULL!	4	5	0	0	0	0	0	0	0	1	0	0	0	1	0	0	0	3
2		7	1	#NULL!	#NULL!	#NULL!	#NULL!	#NULL!		2	3	4	2	42101	2	4	2	4	4	4	3	3	3	5	5	5	3	2	2	2	#NULL!	2	2	0	0	0	0	0	0	0	1	1	1	1	1	1	1	0	3
2		3	1	#NULL!	#NULL!	#NULL!	#NULL!	#NULL!		2	3	3	1	80904	2	3	0	4	3	2	2	4	2	5	5	4	1	1	1	1	#NULL!	4	5	0	0	0	0	0	0	0	1	1	1	1	1	1	1	0	3
2		7	1	#NULL!	#NULL!	#NULL!	#NULL!	#NULL!		2	5	8	2	33823	4	4	4	4	4	4	2	2	2	5	5	5	2	1	1	1	2	4	5	0	0	0	0	0	0	0	1	1	1	1	1	1	1	0	3
2		6	1	#NULL!	#NULL!	#NULL!	#NULL!	#NULL!		2	3	4	1	29687	0	0	0	4	0	4	3	3	3	5	5	5	5	3	3	3	1	1	6	0	0	0	0	0	0	0	1	0	0	0	0	0	0	1	3
2		7	1	#NULL!	#NULL!	#NULL!	#NULL!	#NULL!		2	2	6	2	32137	3	3	2	4	4	3	3	3	3	3	3	3	3	2	2	2	#NULL!	2	5	0	0	0	0	0	0	0	1	0	0	0	1	0	0	0	3
2		7	1	#NULL!	#NULL!	#NULL!	#NULL!	#NULL!		2	6	4	2	23603	2	4	4	4	4	4	4	3	3	4	4	4	3	3	2	2	#NULL!	2	6	0	0	0	0	0	0	0	1	0	0	0	1	0	1	0	3
2		4	#NULL!	1	#NULL!	#NULL!	#NULL!	#NULL!		2	3	7	2	78634	0	0	0	0	0	0	5	5	5	5	4	5	5	4	4	4	2	1	6	0	0	0	0	0	0	0	1	0	0	0	0	0	0	1	3
2		4	1	#NULL!	#NULL!	#NULL!	#NULL!	#NULL!		2	2	2	1	44420	1	0	0	4	3	0	4	4	3	5	4	5	3	3	2	2	#NULL!	4	5	0	0	0	0	0	0	0	1	0	0	0	1	0	0	0	3
2		4	1	#NULL!	#NULL!	#NULL!	#NULL!	#NULL!		2	3	1	2	34480	1	1	2	3	2	2	1	1	1	5	5	5	3	1	1	1	#NULL!	3	4	0	0	0	0	0	0	0	1	1	1	1	1	1	1	0	3
2		4	1	#NULL!	#NULL!	#NULL!	#NULL!	#NULL!		2	3	1	1	28655	4	4	4	4	4	4	5	1	4	5	5	5	5	3	4	4	#NULL!	3	6	0	0	0	0	0	0	0	1	0	0	0	0	0	0	1	3
2		6	1	#NULL!	#NULL!	#NULL!	#NULL!	#NULL!		2	3	3	1	49090	2	2	2	4	3	3	2	2	2	4	4	4	3	2	2	2	#NULL!	4	5	0	0	0	0	0	0	0	1	1	1	1	1	1	1	0	3
2		7	1	#NULL!	#NULL!	#NULL!	#NULL!	#NULL!		2	5	3	2	99212	2	2	2	2	2	2	5	3	5	5	5	5	3	3	3	3	1	5	6	0	0	0	0	0	0	0	1	1	0	0	1	0	0	0	3
2		4	1	#NULL!	#NULL!	#NULL!	#NULL!	#NULL!		2	3	11	2	15243	2	2	1	2	2	2	3	3	3	3	4	3	3	3	3	3	#NULL!	3	5	0	0	0	0	0	0	0	1	0	0	0	1	0	0	0	3
2		6	1	#NULL!	#NULL!	#NULL!	#NULL!	#NULL!		2	2	11	2	89441	0	3	3	4	4	4	1	1	1	3	5	5	1	1	1	1	#NULL!	1	5	0	0	0	0	0	0	0	1	1	1	1	1	1	1	0	3
2		3	1	#NULL!	#NULL!	#NULL!	#NULL!	#NULL!		2	2	3	2	49442	4	4	4	4	4	1	5	5	5	5	5	5	5	5	5	5	#NULL!	2	4	0	0	0	0	0	0	0	1	0	0	0	1	0	0	0	3
2		8	1	#NULL!	#NULL!	#NULL!	#NULL!	#NULL!		2	2	2	2	11796	0	0	0	2	2	2	4	4	4	4	4	4	3	1	2	2	#NULL!	1	3	0	0	0	0	0	0	0	1	0	1	1	1	0	1	0	3
2		6	1	#NULL!	#NULL!	#NULL!	#NULL!	#NULL!		2	3	4	2	32176	1	2	3	4	3	0	5	4	5	4	5	5	3	1	1	1	2	3	6	0	0	0	0	0	0	0	1	1	1	1	1	1	1	0	3
2		2	1	#NULL!	#NULL!	#NULL!	#NULL!	#NULL!		2	3	5	2	31698	0	0	0	4	3	2	2	2	2	4	4	4	2	2	2	2	2	3	5	0	0	0	0	0	0	0	1	0	0	0	1	0	1	0	3
2		7	#NULL!	1	#NULL!	#NULL!	#NULL!	#NULL!		2	5	3	1	27606	2	3	3	4	3	2	2	2	2	5	5	5	3	1	1	1	#NULL!	1	5	0	0	0	0	0	0	0	1	0	0	0	1	0	0	0	3
2		2	1	1	#NULL!	#NULL!	#NULL!	#NULL!		2	3	10	2	01267	1	2	0	4	4	3	2	2	1	2	5	5	2	1	1	1	1	5	5	0	0	0	0	0	0	0	1	1	1	1	1	1	1	0	3
2		3	1	#NULL!	#NULL!	#NULL!	#NULL!	#NULL!		2	3	4	2	60803	3	3	1	3	3	3	1	1	1	1	1	1	1	1	1	1	#NULL!	3	6	0	0	0	0	0	0	0	1	1	0	0	1	0	0	0	3
2		6	1	#NULL!	#NULL!	#NULL!	#NULL!	#NULL!		2	1	8	1	23455	2	3	0	4	4	4	3	4	4	4	4	5	3	4	2	3	#NULL!	4	6	0	0	0	0	0	0	0	1	1	1	1	1	1	1	0	3
2		6	1	#NULL!	#NULL!	#NULL!	#NULL!	#NULL!		2	3	3	1	10463	3	3	3	4	2	2	3	3	3	4	4	4	3	3	3	3	2	4	6	0	0	0	0	0	0	0	1	1	1	1	1	0	1	0	3
2		6	1	#NULL!	#NULL!	#NULL!	#NULL!	#NULL!		2	1	5	2	14225	2	4	1	4	4	3	5	3	4	1	1	1	5	3	3	5	#NULL!	1	5	0	0	0	0	0	0	0	1	0	0	0	0	0	0	1	3
2		6	1	#NULL!	#NULL!	#NULL!	#NULL!	#NULL!		2	5	11	2	06037	2	4	4	4	4	4	1	1	1	3	4	4	1	1	1	1	#NULL!	3	6	0	0	0	0	0	0	0	1	1	1	1	1	1	1	0	3
2		7	1	#NULL!	#NULL!	#NULL!	#NULL!	#NULL!		2	2	3	2	95825	2	2	1	2	2	1	4	4	4	4	4	4	4	2	2	2	#NULL!	1	1	0	0	0	0	0	0	0	1	1	1	0	1	1	1	0	3
2		4	1	#NULL!	#NULL!	#NULL!	#NULL!	#NULL!		2	3	11	2	37043	2	3	2	4	3	3	4	4	2	4	5	5	3	3	3	3	2	2	5	0	0	0	0	0	0	0	1	1	1	1	1	1	1	0	3
2		2	1	#NULL!	#NULL!	#NULL!	#NULL!	#NULL!		2	3	11	2	28075	4	4	4	4	4	4	4	3	1	4	5	4	3	1	1	1	2	3	6	0	0	0	0	0	0	0	1	0	0	0	1	0	0	0	3
2		6	1	#NULL!	#NULL!	#NULL!	#NULL!	#NULL!		2	3	2	2	19901	4	4	4	4	2	2	1	1	1	1	1	1	1	1	1	1	#NULL!	1	5	0	0	0	0	0	0	0	1	0	0	1	1	0	1	0	3
2		6	1	#NULL!	#NULL!	#NULL!	#NULL!	#NULL!		2	2	8	2	46544	2	3	2	3	3	2	3	3	3	4	4	4	3	2	2	2	2	2	5	0	0	0	0	0	0	0	1	1	0	0	1	1	0	0	3
2		6	1	#NULL!	#NULL!	#NULL!	#NULL!	#NULL!		2	4	4	2	73160	1	4	3	4	4	4	4	4	4	5	5	5	5	4	3	4	2	4	1	0	0	0	0	0	0	0	1	0	0	0	0	0	0	1	3
2		6	1	#NULL!	#NULL!	#NULL!	#NULL!	#NULL!		2	5	4	1	93906	3	4	3	3	3	3	4	4	4	5	4	5	4	3	3	3	2	3	5	0	0	0	0	0	0	0	1	1	1	1	1	1	1	0	3
2		3	1	#NULL!	#NULL!	#NULL!	#NULL!	#NULL!		2	4	1	1	32765	1	1	0	3	2	1	3	2	3	5	5	5	3	3	3	3	#NULL!	4	5	0	0	0	0	0	0	0	1	1	1	1	1	1	1	0	3
2		7	1	#NULL!	#NULL!	#NULL!	#NULL!	#NULL!		2	6	7	2	98077	2	3	3	4	4	4	2	2	2	4	4	4	3	2	2	2	#NULL!	1	3	0	0	0	0	0	0	0	1	0	1	1	0	0	0	0	3
2		6	1	#NULL!	#NULL!	#NULL!	#NULL!	#NULL!		2	3	5	2	80033	2	3	2	4	4	4	3	3	3	3	3	3	3	3	3	3	#NULL!	2	5	0	0	0	0	0	0	0	1	0	0	0	1	0	0	0	3
2		4	1	#NULL!	#NULL!	#NULL!	#NULL!	#NULL!		2	2	1	1	68502	2	1	1	4	4	1	1	1	1	5	5	5	1	1	1	1	#NULL!	1	6	0	0	0	0	0	0	0	1	1	1	1	1	1	1	0	3
2		4	1	#NULL!	#NULL!	#NULL!	#NULL!	#NULL!		2	4	7	2	98032	2	3	2	3	3	3	4	4	3	4	5	4	2	2	2	3	#NULL!	2	5	0	0	0	0	0	0	0	1	0	0	0	1	0	0	0	3
2		5	1	#NULL!	#NULL!	#NULL!	#NULL!	#NULL!		2	6	11	2	55016	0	2	1	4	1	1	1	1	1	3	3	3	1	1	1	1	2	3	5	0	0	0	0	0	0	0	1	0	0	0	0	0	0	1	3
2		5	1	#NULL!	#NULL!	#NULL!	#NULL!	#NULL!		2	3	5	2	49525	4	4	4	2	4	4	1	3	3	1	1	1	1	5	4	4	2	1	5	0	0	0	0	0	0	0	1	0	1	0	0	0	0	0	3
2		5	1	#NULL!	#NULL!	#NULL!	#NULL!	#NULL!		2	3	7	2	37615	3	3	3	4	4	4	2	2	2	2	3	4	1	1	1	1	#NULL!	2	5	0	0	0	0	0	0	0	1	1	1	1	1	1	1	0	3
2		8	1	#NULL!	#NULL!	#NULL!	#NULL!	#NULL!		2	5	5	2	28461	4	4	4	4	4	4	3	3	3	4	4	4	3	3	2	2	1	2	5	0	0	0	0	0	0	0	1	0	0	0	0	0	0	1	3
2		3	1	#NULL!	#NULL!	#NULL!	#NULL!	#NULL!		2	5	5	2	32258	3	4	3	4	4	3	3	2	1	4	5	5	3	1	1	1	#NULL!	1	2	0	0	0	0	0	0	0	1	0	0	0	1	0	0	0	3
2		4	1	#NULL!	#NULL!	#NULL!	#NULL!	#NULL!		2	2	7	2	32534	0	3	3	4	4	4	3	3	3	3	5	5	3	3	3	3	#NULL!	1	2	0	0	0	0	0	0	0	1	0	0	0	0	0	0	1	3
2		5	1	#NULL!	#NULL!	#NULL!	#NULL!	#NULL!		2	3	8	2	99202	4	1	0	4	4	4	1	1	1	5	5	5	3	4	2	1	1	1	5	0	0	0	0	0	0	0	1	0	0	0	1	0	0	0	3
2		7	1	#NULL!	#NULL!	#NULL!	#NULL!	#NULL!		2	3	2	2	35660	4	4	3	4	4	4	2	3	3	1	1	1	1	4	4	4	#NULL!	1	6	0	0	0	0	0	0	0	1	0	0	0	0	1	0	0	3
2		5	#NULL!	1	#NULL!	#NULL!	#NULL!	#NULL!		2	2	3	1	48224	3	2	0	0	2	0	1	4	3	1	1	1	1	5	3	3	2	3	2	0	0	0	0	0	0	0	1	1	1	0	1	0	1	0	3
2		2	#NULL!	#NULL!	#NULL!	#NULL!	#NULL!	1		1	2	1	1	34102	2	3	3	2	1	3	2	4	3	1	1	4	2	5	4	5	#NULL!	4	6	0	0	0	0	0	0	0	1	0	0	1	0	0	0	0	3
2		4	1	#NULL!	#NULL!	#NULL!	#NULL!	#NULL!		1	3	2	2	74467	2	3	3	3	3	4	3	3	2	4	4	4	3	3	2	3	#NULL!	2	5	0	0	0	0	0	0	0	1	1	1	1	1	1	1	0	3
2		7	1	#NULL!	#NULL!	#NULL!	#NULL!	#NULL!		2	4	3	2	01913	3	3	3	3	3	3	4	4	4	5	5	5	4	2	2	2	#NULL!	3	5	0	0	0	0	0	0	0	1	0	0	0	0	0	0	1	3
1		8	1	#NULL!	#NULL!	#NULL!	#NULL!	#NULL!		2	6	3	2	11746	4	4	4	4	4	4	4	2	2	5	4	3	1	1	1	1	#NULL!	3	6	0	0	0	0	0	0	0	1	1	1	1	1	1	1	0	3
1		4	1	#NULL!	#NULL!	#NULL!	#NULL!	#NULL!		2	3	6	2	30116	0	1	2	3	0	1	1	1	1	3	4	4	1	1	1	1	2	4	6	0	0	0	0	0	0	0	1	1	1	1	1	1	1	0	3
1		7	1	#NULL!	#NULL!	#NULL!	#NULL!	#NULL!		2	6	9	2	28104	2	3	3	4	3	4	4	4	3	4	4	5	3	2	2	1	#NULL!	1	5	0	0	0	0	0	0	0	1	1	0	0	1	1	1	0	3
1		7	1	#NULL!	#NULL!	#NULL!	#NULL!	#NULL!		2	5	11	2	28120	4	4	4	4	4	4	4	2	2	5	4	4	2	1	1	1	#NULL!	1	5	0	0	0	0	0	0	0	1	1	1	1	1	1	1	0	3
1		7	#NULL!	#NULL!	#NULL!	1	#NULL!	#NULL!		2	5	6	2	91789	3	3	3	3	3	3	4	4	4	4	4	4	4	4	4	4	2	1	5	0	0	0	0	0	0	0	1	0	0	0	0	0	0	1	3
1		4	1	#NULL!	#NULL!	#NULL!	#NULL!	#NULL!		2	5	8	2	80013	3	3	3	4	3	4	5	1	1	5	5	5	5	5	1	1	#NULL!	2	5	0	0	0	0	0	0	0	1	0	0	1	1	0	0	0	3
1		7	1	#NULL!	#NULL!	#NULL!	#NULL!	#NULL!		2	3	1	2	15235	3	3	2	3	2	2	3	3	3	3	3	4	2	2	2	2	#NULL!	4	5	0	0	0	0	0	0	0	1	0	0	0	0	0	0	1	3
1		4	#NULL!	#NULL!	#NULL!	1	#NULL!	#NULL!		2	3	8	1	10467	4	4	4	4	4	4	5	5	5	5	5	5	5	5	5	5	1	2	1	0	0	0	0	0	0	0	1	0	0	0	0	0	0	1	3
1		7	1	#NULL!	#NULL!	#NULL!	#NULL!	#NULL!		2	3	5	2	75149	2	2	0	3	0	2	3	3	3	4	4	4	4	2	2	2	#NULL!	2	5	0	0	0	0	0	0	0	1	1	1	1	1	1	1	0	3
1		6	1	#NULL!	#NULL!	#NULL!	#NULL!	#NULL!		2	6	11	2	29212	1	3	3	4	3	3	2	2	2	2	2	2	2	2	1	2	2	5	2	0	0	0	0	0	0	0	1	1	1	1	1	1	1	0	3
1		7	1	#NULL!	#NULL!	#NULL!	#NULL!	#NULL!		2	5	5	2	30127	3	2	1	2	2	2	4	4	4	4	4	4	4	2	2	2	1	2	1	0	0	0	0	0	0	0	1	0	0	0	1	0	0	0	3
1		6	1	#NULL!	1	#NULL!	#NULL!	#NULL!		2	5	11	2	08755	3	3	3	4	3	3	3	2	2	4	3	3	1	2	2	1	2	1	5	0	0	0	0	0	0	0	1	1	1	1	1	1	1	0	3
1		4	1	#NULL!	#NULL!	#NULL!	#NULL!	#NULL!		2	4	12	1	94533	4	4	4	4	4	0	5	1	1	5	5	5	1	1	1	1	#NULL!	1	5	0	0	0	0	0	0	0	1	0	0	0	0	0	0	1	3
1		5	1	#NULL!	#NULL!	#NULL!	#NULL!	#NULL!		2	4	11	2	21093	1	3	3	4	4	3	4	4	2	5	5	5	3	3	3	4	#NULL!	1	5	0	0	0	0	0	0	0	1	0	0	0	0	0	0	1	3
1		6	1	#NULL!	#NULL!	#NULL!	#NULL!	#NULL!		2	4	11	2	90249	3	3	3	4	4	3	4	3	2	5	5	5	3	3	2	4	#NULL!	3	5	0	0	0	0	0	0	0	1	0	0	0	1	0	0	0	3
1		8	1	#NULL!	#NULL!	#NULL!	#NULL!	#NULL!		2	6	2	2	80123	0	0	0	0	0	0	1	1	1	3	5	3	5	1	1	1	#NULL!	1	1	0	0	0	0	0	0	0	1	1	1	1	1	1	1	0	3
1		7	1	#NULL!	#NULL!	#NULL!	#NULL!	#NULL!		2	3	7	1	11219	0	0	0	4	3	0	4	4	4	5	5	5	3	5	2	1	#NULL!	2	3	0	0	0	0	0	0	0	1	1	1	1	1	1	1	0	3
1		4	1	#NULL!	#NULL!	#NULL!	#NULL!	#NULL!		2	5	11	2	08031	0	0	0	2	2	1	3	3	3	3	3	3	3	3	3	3	2	1	3	0	0	0	0	0	0	0	1	0	0	0	0	0	0	1	3
1		7	1	#NULL!	#NULL!	#NULL!	#NULL!	#NULL!		2	5	4	2	12061	4	4	4	4	4	4	5	5	3	5	5	5	3	4	3	3	#NULL!	1	5	0	0	0	0	0	0	0	1	0	0	0	0	0	0	1	3
1		6	1	#NULL!	#NULL!	#NULL!	#NULL!	#NULL!		2	3	1	1	90814	4	4	4	4	4	4	4	3	3	5	5	5	2	3	2	1	1	2	5	0	0	0	0	0	0	0	1	1	1	1	1	1	1	0	3
1		7	1	#NULL!	#NULL!	#NULL!	#NULL!	#NULL!		2	5	11	2	85045	4	4	3	4	4	4	3	2	3	3	4	4	2	1	1	1	#NULL!	1	6	0	0	0	0	0	0	0	1	0	0	0	0	0	0	1	3
1		7	1	#NULL!	#NULL!	#NULL!	#NULL!	#NULL!		2	3	11	1	15232	1	1	0	3	1	0	3	4	3	3	5	4	3	1	1	2	#NULL!	2	6	0	0	0	0	0	0	0	1	0	0	0	0	0	0	1	3
1		6	1	#NULL!	#NULL!	#NULL!	#NULL!	#NULL!		2	3	6	2	07003	1	4	1	4	4	4	3	3	3	4	4	4	3	4	4	4	1	1	5	0	0	0	0	0	0	0	1	0	0	0	1	0	0	0	3
1		5	#NULL!	1	#NULL!	#NULL!	#NULL!	#NULL!		2	2	4	2	92630	3	3	3	4	4	4	3	3	3	4	4	4	1	2	2	3	#NULL!	1	6	0	0	0	0	0	0	0	1	0	0	0	0	0	0	1	3
1		6	1	#NULL!	#NULL!	#NULL!	#NULL!	#NULL!		2	4	4	2	29072	4	4	4	4	4	4	4	4	4	4	4	4	3	3	3	3	#NULL!	2	6	0	0	0	0	0	0	0	1	0	0	0	1	0	0	0	3
1		5	1	#NULL!	#NULL!	#NULL!	#NULL!	#NULL!		2	6	4	2	71909	2	2	2	2	1	2	3	3	3	3	2	3	3	2	3	2	1	4	1	0	0	0	0	0	0	0	1	0	0	0	0	0	0	1	3
1		5	1	#NULL!	1	#NULL!	#NULL!	#NULL!		2	2	7	2	68147	0	2	2	4	2	2	5	5	3	5	5	5	1	1	1	1	2	1	5	0	0	0	0	0	0	0	1	1	0	1	1	1	1	0	3
1		4	#NULL!	1	#NULL!	#NULL!	#NULL!	#NULL!		2	5	3	1	64138	4	4	4	4	4	4	2	2	2	5	5	5	2	1	1	1	1	1	3	0	0	0	0	0	0	0	1	1	1	1	1	1	1	0	3
1		4	#NULL!	#NULL!	#NULL!	#NULL!	#NULL!	1	Hispanic	1	2	3	2	78644	2	3	4	4	2	4	4	4	2	4	5	5	3	5	5	1	1	5	2	0	0	0	0	0	0	0	1	1	0	0	0	0	0	0	3
1		6	#NULL!	1	#NULL!	#NULL!	#NULL!	#NULL!		2	3	7	2	35214	3	4	3	4	2	4	4	3	3	4	4	5	4	4	3	3	2	1	6	0	0	0	0	0	0	0	1	0	0	0	0	0	0	1	3
1		3	1	1	#NULL!	#NULL!	#NULL!	#NULL!		2	3	5	2	37040	3	3	2	3	2	2	3	3	3	4	5	5	3	1	1	1	#NULL!	1	2	0	0	0	0	0	0	0	1	0	0	0	1	0	1	0	3
1		7	1	#NULL!	#NULL!	#NULL!	#NULL!	#NULL!		2	3	2	1	36602	0	0	1	3	3	2	3	4	3	4	4	4	1	1	2	2	#NULL!	1	6	0	0	0	0	0	0	0	1	1	0	0	1	0	0	0	3
1		5	1	#NULL!	#NULL!	#NULL!	#NULL!	#NULL!		2	2	2	2	28305	0	0	0	4	0	0	5	3	3	5	5	5	3	3	3	3	#NULL!	4	6	0	0	0	0	0	0	0	1	0	0	0	0	0	0	1	3
1		8	1	#NULL!	#NULL!	#NULL!	#NULL!	#NULL!		2	5	9	1	23503	0	2	0	2	2	1	4	3	3	4	3	4	1	2	2	2	#NULL!	2	1	0	0	0	0	0	0	0	1	0	0	0	0	0	0	1	3
1		4	1	#NULL!	#NULL!	#NULL!	#NULL!	#NULL!		2	2	11	2	19020	3	2	0	4	3	2	5	3	2	5	4	4	2	3	2	3	#NULL!	1	6	0	0	0	0	0	0	0	1	0	0	0	0	0	0	1	3
1		7	1	#NULL!	#NULL!	#NULL!	#NULL!	#NULL!		2	3	11	2	70435	2	2	1	0	0	0	3	3	3	2	2	2	2	2	2	2	#NULL!	1	6	0	0	0	0	0	0	0	1	0	0	0	0	0	0	1	3
1		8	1	#NULL!	#NULL!	#NULL!	#NULL!	#NULL!		2	5	11	2	22033	1	2	0	3	2	3	3	3	3	5	4	4	3	3	1	1	#NULL!	2	5	0	0	0	0	0	0	0	1	0	0	0	0	0	0	1	3
1		6	1	#NULL!	#NULL!	#NULL!	#NULL!	#NULL!		2	6	8	2	14075	3	4	2	4	3	3	3	3	1	5	4	5	3	3	3	3	2	4	5	0	0	0	0	0	0	0	1	0	0	0	1	0	0	0	3
1		6	1	#NULL!	#NULL!	#NULL!	#NULL!	#NULL!		2	3	10	2	98042	2	3	1	4	3	3	4	4	3	5	5	5	4	4	3	3	#NULL!	3	5	0	0	0	0	0	0	0	1	0	0	1	0	0	0	0	3
1		6	1	#NULL!	#NULL!	#NULL!	#NULL!	#NULL!		2	6	5	2	11022	4	4	4	4	4	3	3	3	1	5	5	5	1	1	1	1	#NULL!	1	5	0	0	0	0	0	0	0	1	1	1	1	1	1	1	0	3
1		6	#NULL!	1	#NULL!	#NULL!	#NULL!	#NULL!		2	5	7	2	28376	2	2	2	3	2	2	3	3	3	3	3	3	3	3	3	3	#NULL!	1	5	0	0	0	0	0	0	0	1	0	0	0	1	0	0	0	3
1		7	1	#NULL!	#NULL!	#NULL!	#NULL!	#NULL!		2	5	5	2	08053	3	3	3	3	3	3	4	4	3	5	5	5	4	3	2	3	#NULL!	3	5	0	0	0	0	0	0	0	1	1	1	1	1	1	1	0	3
1		5	#NULL!	#NULL!	#NULL!	#NULL!	#NULL!	1		1	5	5	1	87112	1	1	1	4	2	0	3	3	3	3	3	4	4	5	3	3	#NULL!	1	5	0	0	0	0	0	0	0	1	1	1	1	1	1	1	0	3
1		7	1	#NULL!	#NULL!	#NULL!	#NULL!	#NULL!		2	5	6	2	45011	4	2	2	4	4	2	4	4	3	5	4	4	1	1	1	1	#NULL!	4	5	0	0	0	0	0	0	0	1	1	1	1	1	1	1	0	3
1		7	#NULL!	#NULL!	#NULL!	#NULL!	#NULL!	1	redneck	2	6	4	2	32301	4	4	4	4	4	4	5	5	5	5	5	5	5	2	1	1	#NULL!	2	5	0	0	0	0	0	0	0	1	1	1	0	1	0	1	0	3
1		6	1	#NULL!	#NULL!	#NULL!	#NULL!	#NULL!		2	3	4	1	91910	3	4	4	4	4	3	3	3	3	4	4	5	4	3	2	1	2	2	5	0	0	0	0	0	0	0	1	1	1	0	1	0	1	0	3
1		7	1	#NULL!	#NULL!	#NULL!	#NULL!	#NULL!		2	4	6	2	29073	3	3	3	4	3	3	3	3	3	4	4	4	3	3	2	1	#NULL!	1	5	0	0	0	0	0	0	0	1	1	1	0	1	0	1	0	3
1		7	1	#NULL!	#NULL!	#NULL!	#NULL!	#NULL!		2	7	10	2	48324	0	1	0	2	2	2	4	3	3	5	4	5	2	3	2	1	2	4	6	0	0	0	0	0	0	0	1	1	1	0	1	0	1	0	3
1		7	1	#NULL!	#NULL!	#NULL!	#NULL!	#NULL!		2	3	4	2	15037	4	4	4	4	4	4	3	4	3	4	4	4	3	3	3	3	2	2	5	0	0	0	0	0	0	0	1	1	1	0	1	1	1	0	3
1		7	1	#NULL!	#NULL!	#NULL!	#NULL!	#NULL!		2	4	5	2	41017	1	2	2	1	1	2	4	2	2	4	2	4	3	2	1	1	#NULL!	1	6	0	0	0	0	0	0	0	1	1	1	1	1	0	1	0	3
1		5	1	#NULL!	#NULL!	#NULL!	#NULL!	#NULL!		2	5	8	2	77386	0	2	1	4	3	2	3	3	3	4	4	4	3	3	2	2	#NULL!	2	6	0	0	0	0	0	0	0	1	1	1	1	1	1	1	0	3
1		4	1	#NULL!	#NULL!	#NULL!	#NULL!	#NULL!		2	3	1	2	96080	0	0	0	3	0	0	4	4	1	4	4	4	1	4	4	1	#NULL!	5	6	0	0	0	0	0	0	0	1	0	0	0	0	0	0	1	3
1		5	1	#NULL!	#NULL!	#NULL!	#NULL!	#NULL!		2	4	6	2	10941	4	4	0	4	4	4	3	3	3	5	5	5	5	1	1	1	#NULL!	3	5	0	0	0	0	0	0	0	1	0	0	0	0	1	0	0	3
1		7	#NULL!	#NULL!	#NULL!	1	#NULL!	#NULL!		2	3	8	2	96793	0	2	0	2	2	1	3	3	3	4	4	4	3	3	3	3	2	5	5	0	0	0	0	0	0	0	1	0	0	0	0	0	1	0	3
1		6	1	#NULL!	#NULL!	#NULL!	#NULL!	#NULL!		1	6	8	2	95503	0	0	0	0	1	0	1	1	1	2	2	2	1	1	1	1	#NULL!	4	5	0	0	0	0	0	0	0	1	1	1	1	1	1	1	0	3
1		6	1	#NULL!	#NULL!	#NULL!	#NULL!	#NULL!		2	5	1	2	75077	2	4	4	3	3	3	1	1	1	5	5	5	3	1	1	1	#NULL!	5	5	0	0	0	0	0	0	0	1	1	1	1	1	1	1	0	3
1		5	#NULL!	#NULL!	#NULL!	1	#NULL!	#NULL!		2	2	6	2	71112	1	2	2	2	2	1	3	3	3	3	3	3	3	3	3	3	1	4	6	0	0	0	0	0	0	0	1	0	0	0	0	0	0	1	3
1		7	1	#NULL!	#NULL!	#NULL!	#NULL!	#NULL!		2	4	5	2	55082	1	1	1	1	1	1	2	2	2	4	3	2	1	2	2	2	2	1	5	0	0	0	0	0	0	0	1	1	0	0	1	0	1	0	3
1		5	1	#NULL!	#NULL!	#NULL!	#NULL!	#NULL!		2	2	10	2	44055	3	3	3	4	4	3	4	4	4	4	4	4	3	4	3	3	1	1	2	0	0	0	0	0	0	0	1	0	0	0	1	0	0	0	3
4		5	#NULL!	#NULL!	#NULL!	#NULL!	#NULL!	1	Human	2	3	4	2	98569	2	2	3	2	3	2	3	3	3	4	4	4	3	3	3	2	#NULL!	2	6	1	0	0	0	0	0	0	0	0	1	0	0	0	0	0	3
4		7	1	#NULL!	#NULL!	#NULL!	#NULL!	#NULL!		2	3	2	1	78218	4	4	4	4	4	4	5	5	5	5	5	5	4	2	2	2	#NULL!	1	3	1	0	0	0	0	0	0	0	0	0	0	1	0	0	0	3
3		3	1	#NULL!	#NULL!	#NULL!	#NULL!	#NULL!		2	5	5	1	34238	3	3	1	3	3	2	3	2	2	3	5	5	3	2	1	2	#NULL!	3	6	1	0	0	0	0	0	0	0	0	0	0	0	0	0	1	3
2		6	1	#NULL!	#NULL!	#NULL!	#NULL!	#NULL!		2	2	1	2	30068	2	3	3	4	3	3	4	4	4	4	5	5	4	3	3	3	#NULL!	1	3	1	0	0	0	0	0	0	0	0	0	0	0	0	0	1	3
2		2	#NULL!	1	#NULL!	#NULL!	#NULL!	#NULL!		2	2	2	1	10009	0	0	0	4	4	4	4	4	4	4	4	4	4	4	4	4	#NULL!	1	6	1	0	0	0	0	0	0	0	0	0	0	0	0	0	1	3
2		7	1	#NULL!	#NULL!	#NULL!	#NULL!	#NULL!		2	2	7	1	61614	2	3	2	4	4	2	5	1	2	5	5	5	5	2	1	1	#NULL!	3	6	1	0	0	0	0	0	0	0	0	0	0	0	0	0	1	3
2		3	1	#NULL!	#NULL!	#NULL!	#NULL!	#NULL!		2	4	4	2	38868	2	3	3	3	3	3	1	1	1	5	5	5	3	1	1	1	2	3	5	1	0	0	0	0	0	0	0	0	0	0	0	0	0	1	3
2		5	1	#NULL!	#NULL!	#NULL!	#NULL!	#NULL!		2	2	2	1	03431	4	4	0	4	4	4	5	5	5	5	5	5	5	3	3	3	1	2	1	1	0	0	0	0	0	0	0	0	0	0	0	0	0	1	3
2		4	#NULL!	#NULL!	#NULL!	1	#NULL!	#NULL!		2	5	6	1	11358	3	2	2	4	4	4	5	5	5	5	5	5	5	5	5	5	2	1	4	0	1	1	1	1	1	0	0	0	0	0	0	0	0	1	3
2		4	#NULL!	1	#NULL!	#NULL!	#NULL!	#NULL!		2	3	3	1	43605	3	3	3	4	3	3	3	4	2	3	5	5	2	2	2	2	2	3	2	1	0	0	0	0	0	0	0	0	0	0	0	0	0	1	3
2		4	1	#NULL!	#NULL!	#NULL!	#NULL!	#NULL!		2	2	5	1	89128	0	0	4	4	4	4	5	5	5	5	5	5	5	5	5	5	2	3	1	1	0	0	0	0	0	0	0	0	0	0	0	0	0	1	3
2		7	1	#NULL!	#NULL!	#NULL!	#NULL!	#NULL!		2	5	7	1	80247	3	3	3	3	3	3	4	4	4	5	5	5	5	3	3	3	#NULL!	1	1	1	0	0	0	0	0	0	0	0	0	0	0	0	0	1	3
2		8	1	#NULL!	#NULL!	#NULL!	#NULL!	#NULL!		2	3	5	2	27540	2	2	2	3	3	3	4	4	4	5	5	5	5	3	3	3	#NULL!	4	6	1	0	0	0	0	0	0	0	0	0	0	0	0	0	1	3
2		3	#NULL!	1	#NULL!	#NULL!	#NULL!	#NULL!		2	2	2	2	71303	4	4	2	4	4	4	1	3	1	5	5	5	3	4	1	1	2	1	2	1	0	0	0	0	0	0	0	0	0	0	0	0	0	1	3
2		7	1	#NULL!	#NULL!	#NULL!	#NULL!	#NULL!		2	5	2	2	30518	2	0	0	4	4	2	4	4	4	5	5	5	3	3	3	3	2	3	5	1	0	0	0	0	0	0	0	0	0	0	0	0	0	1	3
2		6	1	#NULL!	#NULL!	#NULL!	#NULL!	#NULL!		2	5	8	1	47591	0	0	0	3	2	1	4	4	4	4	4	4	4	1	1	2	1	4	5	1	0	0	0	0	0	0	0	0	0	0	0	0	0	1	3
2		4	1	#NULL!	#NULL!	#NULL!	#NULL!	#NULL!		2	6	11	2	21157	2	3	2	3	3	3	3	2	2	4	5	4	3	3	2	2	2	3	2	0	1	1	0	0	0	0	0	0	1	0	1	0	0	0	3
2		7	1	#NULL!	#NULL!	#NULL!	#NULL!	#NULL!		2	5	8	1	32780	1	2	2	3	3	3	4	2	2	4	4	4	4	2	2	4	2	3	5	1	0	0	0	0	0	0	0	0	0	0	0	0	0	1	3
2		6	1	#NULL!	#NULL!	#NULL!	#NULL!	#NULL!		2	2	7	2	46143	4	4	4	4	4	4	4	4	3	4	5	5	4	2	2	2	#NULL!	1	6	1	0	0	0	0	0	0	0	0	0	0	0	0	0	1	3
2		2	1	#NULL!	#NULL!	#NULL!	#NULL!	#NULL!		2	2	7	2	20879	4	4	4	4	4	4	4	4	4	4	4	4	4	4	4	4	2	3	5	1	1	1	1	1	1	1	0	0	0	0	0	0	0	1	3
2		7	1	#NULL!	#NULL!	#NULL!	#NULL!	#NULL!		2	3	5	2	21286	4	3	2	4	4	4	5	5	5	5	5	5	5	5	5	5	2	1	6	1	0	0	0	0	0	0	0	0	0	0	0	0	0	1	3
2		5	1	#NULL!	#NULL!	#NULL!	#NULL!	#NULL!		2	2	4	2	49221	2	2	2	3	3	3	1	1	1	1	3	1	1	1	1	1	#NULL!	1	6	1	1	1	1	1	1	1	0	0	0	0	0	0	0	1	3
2		7	1	#NULL!	#NULL!	#NULL!	#NULL!	#NULL!		2	4	2	2	33917	1	3	1	3	3	3	3	3	3	5	4	5	3	3	3	3	#NULL!	2	6	1	0	0	0	0	0	0	0	0	0	0	0	0	0	1	3
2		8	1	#NULL!	#NULL!	#NULL!	#NULL!	#NULL!		2	2	3	1	07087	0	2	0	4	2	2	4	4	3	5	4	5	3	2	2	2	#NULL!	3	6	1	0	0	0	0	0	0	0	0	0	0	0	0	0	1	3
2		5	1	1	1	#NULL!	#NULL!	#NULL!		2	5	7	2	29585	4	4	4	4	4	4	3	3	3	4	4	4	3	3	3	3	2	3	1	1	0	0	0	0	0	0	0	0	0	0	0	0	0	1	3
2		4	1	#NULL!	#NULL!	#NULL!	#NULL!	#NULL!		2	5	6	2	80123	2	2	2	4	3	3	4	4	3	4	4	4	4	4	4	4	#NULL!	1	5	1	0	0	0	0	0	0	0	0	0	0	0	0	0	1	3
2		7	1	#NULL!	#NULL!	#NULL!	#NULL!	#NULL!		2	5	9	2	01522	3	4	3	4	4	4	4	4	3	5	5	5	3	1	1	1	2	3	5	1	0	0	0	0	0	0	0	0	0	0	1	0	1	0	3
2		6	#NULL!	1	#NULL!	#NULL!	#NULL!	#NULL!		2	4	2	1	89106	4	4	2	4	4	4	5	5	4	5	5	5	5	3	3	4	2	3	5	1	0	0	1	1	1	0	0	0	0	0	0	0	0	1	3
2		8	1	#NULL!	#NULL!	#NULL!	#NULL!	#NULL!		2	3	2	1	99205	2	1	1	3	2	3	5	5	5	4	5	5	3	1	1	1	#NULL!	2	6	1	0	0	0	1	0	0	0	0	0	0	0	0	0	1	3
2		6	1	#NULL!	#NULL!	#NULL!	#NULL!	#NULL!		2	2	10	2	11565	3	3	2	3	3	2	4	4	4	4	4	4	4	4	4	4	1	1	5	1	0	0	0	0	0	0	0	0	0	0	1	0	0	0	3
2		6	1	#NULL!	#NULL!	#NULL!	#NULL!	#NULL!		2	2	3	2	98030	3	4	3	4	4	2	5	5	5	5	5	5	5	5	5	5	2	3	3	1	0	0	0	0	0	0	0	0	0	0	0	0	0	1	3
2		5	1	#NULL!	#NULL!	#NULL!	#NULL!	#NULL!		1	4	6	1	85745	4	4	2	4	2	2	4	4	4	5	4	5	3	3	3	3	2	1	5	1	0	1	1	1	1	0	0	0	0	0	0	0	0	1	3
2		5	1	#NULL!	#NULL!	#NULL!	#NULL!	#NULL!		2	3	11	2	77573	0	2	2	4	4	4	5	5	5	5	5	5	5	5	5	5	#NULL!	1	6	1	0	0	0	0	0	0	0	0	0	0	0	0	0	1	3
2		8	1	#NULL!	#NULL!	#NULL!	#NULL!	#NULL!		2	6	10	2	02043	3	3	4	4	3	2	5	1	1	4	4	4	1	1	1	1	2	3	6	1	0	0	0	0	0	0	0	0	0	0	0	0	0	1	3
2		7	1	#NULL!	#NULL!	#NULL!	#NULL!	#NULL!		2	6	2	1	11374	4	3	0	4	4	3	4	4	4	5	5	5	4	4	3	3	1	1	6	0	0	1	1	1	0	0	0	1	1	1	1	1	1	0	3
2		7	1	#NULL!	#NULL!	#NULL!	#NULL!	#NULL!		2	2	5	2	23233	3	3	3	3	3	0	4	4	4	4	4	4	4	3	3	3	#NULL!	2	5	1	0	0	0	0	0	0	0	0	0	0	0	0	0	1	3
2		6	1	#NULL!	#NULL!	#NULL!	#NULL!	#NULL!		2	4	5	2	77517	4	4	4	4	3	2	4	4	4	5	5	5	4	2	2	2	2	3	6	0	0	0	0	0	1	0	0	0	0	0	0	0	0	1	3
2		4	1	#NULL!	#NULL!	#NULL!	#NULL!	#NULL!		2	2	4	2	06511	4	4	4	4	4	4	3	3	4	3	3	3	3	4	2	5	1	1	1	1	0	0	0	0	0	0	0	0	1	1	0	1	1	0	3
2		3	1	#NULL!	#NULL!	#NULL!	#NULL!	#NULL!		1	5	6	1	79938	3	3	2	3	3	2	2	4	3	2	2	2	1	2	3	5	2	3	5	0	0	1	0	0	1	0	0	0	0	0	0	0	0	1	3
2		2	#NULL!	1	#NULL!	#NULL!	#NULL!	#NULL!		2	2	1	2	60643	4	4	4	4	4	4	5	5	5	5	5	5	5	5	5	3	#NULL!	1	6	1	1	1	1	1	1	1	0	1	1	1	1	1	1	0	3
2		5	1	#NULL!	#NULL!	#NULL!	#NULL!	#NULL!		2	4	4	2	43607	4	4	4	4	4	4	5	5	5	5	5	5	5	5	5	5	2	3	5	1	0	0	0	0	0	0	0	0	0	0	0	0	0	1	3
2		6	1	#NULL!	#NULL!	#NULL!	#NULL!	#NULL!		2	5	3	1	98363	4	4	4	4	4	4	2	4	4	4	5	5	4	3	3	4	#NULL!	3	6	1	1	1	1	1	1	1	0	0	0	0	0	0	0	1	3
2		6	1	#NULL!	#NULL!	#NULL!	#NULL!	#NULL!		2	3	2	1	26101	2	2	2	3	3	3	3	3	3	4	4	4	4	3	3	3	#NULL!	4	6	1	0	0	0	0	0	0	0	0	0	0	0	0	0	1	3
2		4	#NULL!	1	#NULL!	#NULL!	#NULL!	#NULL!		2	5	4	2	75118	3	4	4	4	4	4	2	4	3	2	3	2	2	4	4	5	2	4	5	1	0	0	0	0	0	0	0	0	0	0	0	1	0	0	3
2		4	1	#NULL!	#NULL!	#NULL!	#NULL!	#NULL!		2	5	3	2	05701	4	4	4	4	4	4	4	4	4	5	5	5	5	1	2	1	2	3	5	1	1	1	1	1	1	1	0	0	0	0	0	0	0	1	3
2		4	1	#NULL!	#NULL!	#NULL!	#NULL!	#NULL!		2	4	8	2	91601	2	2	0	4	4	4	3	3	3	3	3	3	3	3	3	3	#NULL!	1	5	1	0	0	0	1	1	1	0	1	0	0	0	1	0	0	3
2		6	1	#NULL!	#NULL!	#NULL!	#NULL!	#NULL!		2	2	4	2	19020	0	2	2	4	4	4	3	3	1	5	5	5	4	2	2	4	#NULL!	4	1	1	0	0	0	0	0	0	0	0	0	0	0	0	0	1	3
2		4	1	#NULL!	#NULL!	#NULL!	#NULL!	#NULL!		2	2	4	1	08610	1	2	2	4	4	3	4	4	4	5	5	5	4	5	3	3	2	3	5	1	1	1	1	1	1	1	0	0	0	0	0	0	0	1	3
2		7	1	#NULL!	#NULL!	#NULL!	#NULL!	#NULL!		2	2	3	2	91343	0	1	2	4	4	4	5	5	5	5	5	5	5	5	3	3	#NULL!	1	5	1	0	0	0	0	1	1	0	0	0	0	0	0	0	1	3
2		2	1	#NULL!	#NULL!	#NULL!	#NULL!	#NULL!		2	2	7	1	50310	2	0	0	2	0	0	1	2	1	5	5	5	3	3	3	3	2	3	5	0	0	1	0	0	1	0	0	1	0	0	0	1	0	0	3
2		6	1	#NULL!	#NULL!	#NULL!	#NULL!	#NULL!		2	3	8	2	15229	4	4	4	4	3	3	4	3	2	5	5	5	5	2	2	2	2	4	5	1	0	0	0	0	0	0	0	0	0	0	1	0	0	0	3
2		4	#NULL!	1	#NULL!	#NULL!	#NULL!	#NULL!		2	4	4	1	33612	0	2	0	2	2	2	2	3	3	5	5	5	5	5	5	5	1	2	1	1	0	0	0	0	0	0	0	0	0	0	0	0	0	1	3
2		5	1	#NULL!	#NULL!	#NULL!	#NULL!	#NULL!		2	2	1	1	01850	0	0	0	2	0	0	3	3	3	3	3	3	3	3	3	3	#NULL!	3	2	0	0	1	0	0	0	0	0	0	0	0	0	0	0	1	3
2		3	#NULL!	#NULL!	#NULL!	#NULL!	#NULL!	1	Multiracial	2	2	3	2	08865	4	2	2	3	3	3	4	4	4	5	5	5	5	5	5	5	#NULL!	3	2	1	0	0	0	0	0	0	0	0	0	0	0	0	0	1	3
2		5	#NULL!	1	#NULL!	#NULL!	#NULL!	#NULL!		2	2	1	1	71801	1	1	0	4	4	4	4	4	4	5	5	5	5	5	5	5	#NULL!	1	6	1	0	0	0	0	0	0	0	0	0	0	0	0	0	1	3
2		7	1	#NULL!	#NULL!	#NULL!	#NULL!	#NULL!		2	3	2	1	33435	2	2	2	3	3	3	5	5	5	5	5	5	5	1	1	1	#NULL!	3	5	1	1	1	1	1	1	1	0	0	0	0	0	0	0	1	3
2		7	1	#NULL!	#NULL!	#NULL!	#NULL!	#NULL!		2	7	10	2	32309	3	3	2	4	4	2	5	4	5	5	5	5	5	3	3	4	#NULL!	1	4	1	0	0	0	0	0	0	0	0	0	0	0	0	0	1	3
2		6	#NULL!	1	#NULL!	#NULL!	#NULL!	#NULL!		2	2	2	1	31204	0	0	0	2	1	0	3	3	3	3	3	3	3	3	3	3	#NULL!	1	3	1	0	0	0	0	0	0	0	0	0	0	0	0	0	1	3
2		7	1	#NULL!	#NULL!	#NULL!	#NULL!	#NULL!		2	3	8	1	36107	3	3	3	4	4	3	4	4	3	4	4	4	3	2	2	2	2	1	6	1	0	0	0	0	0	0	0	0	0	0	0	0	0	1	3
2		7	1	#NULL!	#NULL!	#NULL!	#NULL!	#NULL!		2	2	7	2	21061	4	4	4	4	4	4	4	4	4	4	4	4	4	4	4	4	#NULL!	1	6	1	0	0	0	0	0	0	0	0	0	0	0	0	0	1	3
2		7	1	#NULL!	#NULL!	#NULL!	#NULL!	#NULL!		2	3	5	2	02675	4	4	4	4	4	4	5	5	5	5	5	5	5	3	3	3	2	3	5	1	0	0	0	0	0	0	0	0	0	0	0	0	0	1	3
2		7	1	#NULL!	#NULL!	#NULL!	#NULL!	#NULL!		2	5	5	2	85715	4	4	4	4	3	4	4	4	3	4	5	5	4	4	2	2	2	3	5	1	1	1	1	1	1	1	0	0	0	0	0	0	0	1	3
2		7	1	#NULL!	#NULL!	#NULL!	#NULL!	#NULL!		2	2	2	2	75149	2	3	2	4	4	3	3	3	3	5	4	4	3	3	3	3	#NULL!	3	5	1	0	0	0	0	0	0	0	0	0	0	0	0	0	1	3
2		5	1	#NULL!	#NULL!	#NULL!	#NULL!	#NULL!		2	2	3	2	48038	3	4	4	4	4	2	3	3	2	5	5	5	2	1	1	1	1	1	5	1	1	1	1	0	1	0	0	0	0	0	1	0	0	0	3
2		8	1	#NULL!	#NULL!	#NULL!	#NULL!	#NULL!		2	4	5	2	92584	3	4	3	3	3	3	4	5	4	5	5	5	5	5	4	3	#NULL!	1	5	1	0	0	0	0	0	0	0	0	0	0	0	0	0	1	3
2		3	1	#NULL!	#NULL!	#NULL!	#NULL!	#NULL!		2	3	3	2	34951	0	2	2	2	2	2	4	4	4	4	4	4	4	3	3	3	#NULL!	1	6	1	0	0	0	0	0	0	0	0	0	0	0	0	0	1	3
2		6	1	#NULL!	#NULL!	#NULL!	#NULL!	#NULL!		2	2	7	2	27103	0	0	0	4	4	4	4	4	4	5	5	5	3	5	3	3	2	1	5	1	0	1	1	0	1	1	0	0	0	0	0	0	0	1	3
2		6	1	#NULL!	#NULL!	#NULL!	#NULL!	#NULL!		2	3	1	2	71108	3	3	3	4	0	1	5	5	5	5	5	5	5	3	3	3	2	3	5	1	0	0	0	0	0	0	0	0	0	0	1	0	0	0	3
2		5	1	#NULL!	#NULL!	#NULL!	#NULL!	#NULL!		2	1	1	2	42754	1	4	2	4	4	4	3	3	3	4	4	4	4	3	4	4	2	1	5	1	0	0	0	0	0	0	0	0	0	0	0	0	0	1	3
2		6	1	#NULL!	#NULL!	#NULL!	#NULL!	#NULL!		2	2	2	1	17872	1	3	1	4	4	3	4	2	1	4	5	5	3	1	1	1	#NULL!	2	6	0	0	0	0	1	1	0	0	0	0	0	0	0	0	1	3
2		7	1	#NULL!	#NULL!	#NULL!	#NULL!	#NULL!		2	3	3	1	50310	2	4	4	4	4	0	4	3	3	5	5	5	4	3	2	3	2	3	5	1	0	0	0	0	0	0	0	0	0	0	0	1	0	0	3
2		5	1	#NULL!	#NULL!	#NULL!	#NULL!	#NULL!		2	4	4	1	85032	3	4	4	4	4	4	5	5	5	5	5	5	5	5	5	5	#NULL!	2	5	1	0	0	0	0	0	0	0	0	0	0	0	0	0	1	3
2		4	1	#NULL!	#NULL!	#NULL!	#NULL!	#NULL!		2	3	11	2	70769	1	3	2	3	4	3	4	4	3	5	4	4	4	5	4	3	1	2	2	0	1	0	0	0	0	0	0	0	0	0	1	0	0	0	3
2		7	1	#NULL!	#NULL!	#NULL!	#NULL!	#NULL!		2	5	2	2	06484	2	3	2	4	4	4	3	3	3	2	3	3	2	1	1	1	#NULL!	1	5	1	0	0	0	0	0	0	0	0	0	0	0	0	0	1	3
2		7	1	#NULL!	#NULL!	#NULL!	#NULL!	#NULL!		2	2	1	1	02151	0	0	0	3	3	3	4	4	4	5	5	5	4	5	2	2	#NULL!	1	5	1	0	0	1	0	1	1	0	0	0	0	0	0	0	1	3
2		7	1	#NULL!	#NULL!	#NULL!	#NULL!	#NULL!		2	2	2	1	75001	2	2	2	3	3	3	4	4	4	4	4	4	4	2	2	2	1	2	5	0	1	1	0	0	0	0	0	1	0	0	1	0	1	0	3
2		7	1	#NULL!	#NULL!	#NULL!	#NULL!	#NULL!		2	3	11	2	84037	3	3	3	3	3	3	4	4	3	5	5	5	5	4	5	4	1	1	6	1	0	0	0	0	0	0	0	0	0	0	0	0	0	1	3
2		7	1	#NULL!	#NULL!	#NULL!	#NULL!	#NULL!		2	5	8	2	34698	3	3	1	3	4	2	4	4	4	4	4	4	3	4	4	3	#NULL!	1	5	1	0	0	0	0	0	0	0	0	0	0	0	0	0	1	3
2		5	#NULL!	1	#NULL!	#NULL!	#NULL!	#NULL!		2	5	4	1	14301	0	1	0	4	4	2	5	1	1	5	5	5	5	1	1	1	2	3	3	1	0	0	0	0	0	0	0	0	0	0	0	0	0	1	3
2		5	1	#NULL!	#NULL!	#NULL!	#NULL!	#NULL!		2	4	3	2	28562	3	4	3	4	4	4	5	5	5	5	5	5	5	5	5	5	2	3	5	1	0	0	0	0	0	0	0	0	0	0	0	0	0	1	3
2		6	1	#NULL!	#NULL!	#NULL!	#NULL!	#NULL!		2	5	2	1	87108	3	3	3	4	4	4	1	1	1	5	5	5	3	2	2	2	2	1	6	1	0	0	0	0	0	0	0	0	0	0	0	0	0	1	3
2		7	1	#NULL!	#NULL!	#NULL!	#NULL!	#NULL!		2	7	11	2	99501	2	2	2	2	2	2	5	5	5	5	5	5	5	5	5	5	#NULL!	1	5	1	0	0	0	0	0	0	0	0	0	0	0	0	0	1	3
2		8	1	#NULL!	#NULL!	#NULL!	#NULL!	#NULL!		2	2	3	2	32780	2	2	2	4	3	3	5	5	5	5	5	5	5	5	5	5	2	1	6	1	1	1	1	1	1	1	0	0	0	0	0	0	0	1	3
2		7	1	#NULL!	#NULL!	#NULL!	#NULL!	#NULL!		2	4	4	2	17313	4	4	2	4	4	2	4	2	3	5	5	5	2	2	2	2	2	3	2	0	1	0	0	0	0	0	0	1	0	0	0	0	0	0	3
2		2	#NULL!	#NULL!	#NULL!	#NULL!	#NULL!	1	Hispanic	1	3	7	1	90002	4	4	0	4	0	4	5	5	5	5	5	5	5	5	5	5	#NULL!	1	1	1	1	1	1	1	1	1	0	0	0	0	0	0	0	1	3
2		7	1	#NULL!	#NULL!	#NULL!	#NULL!	#NULL!		2	2	2	1	68157	0	2	0	3	3	2	3	3	3	4	4	4	4	3	3	3	#NULL!	1	5	1	0	0	0	0	0	0	0	0	0	0	0	0	0	1	3
2		4	1	#NULL!	#NULL!	#NULL!	#NULL!	#NULL!		2	2	5	1	02908	2	2	2	4	4	4	1	4	4	4	4	4	4	5	5	4	#NULL!	2	6	1	1	1	1	1	1	1	0	0	0	0	0	0	0	1	3
2		7	1	#NULL!	#NULL!	#NULL!	#NULL!	#NULL!		2	3	9	2	08837	3	3	3	3	3	3	4	4	3	4	4	4	4	4	3	3	2	3	6	1	0	0	0	0	0	0	0	0	0	0	0	0	0	1	3
2		6	1	#NULL!	#NULL!	#NULL!	#NULL!	#NULL!		2	2	5	1	58701	3	3	3	2	2	3	4	4	4	4	4	4	4	4	3	3	#NULL!	1	6	1	0	0	0	0	0	0	0	0	0	0	0	0	0	1	3
2		5	1	#NULL!	#NULL!	#NULL!	#NULL!	#NULL!		2	2	5	2	85350	0	2	0	4	3	0	1	1	3	3	5	5	5	5	3	3	#NULL!	1	6	0	0	0	0	0	0	1	0	0	0	0	0	0	0	1	3
2		6	1	#NULL!	#NULL!	#NULL!	#NULL!	#NULL!		2	2	2	1	13502	3	3	3	4	4	4	5	5	5	5	5	5	5	5	5	5	2	3	6	1	0	0	0	0	0	0	0	0	0	0	0	0	0	1	3
2		7	1	#NULL!	#NULL!	#NULL!	#NULL!	#NULL!		2	3	6	2	06801	4	4	4	4	4	4	5	5	5	5	5	5	5	3	3	3	2	3	6	1	1	1	1	1	1	1	0	0	0	0	0	0	0	1	3
2		3	1	#NULL!	#NULL!	#NULL!	#NULL!	#NULL!		1	3	6	2	77379	2	3	3	3	3	3	4	4	4	5	5	5	4	4	4	4	#NULL!	4	6	1	1	1	1	1	1	1	0	0	0	0	1	0	0	0	3
2		7	1	#NULL!	#NULL!	#NULL!	#NULL!	#NULL!		2	3	12	2	55068	3	3	1	4	4	3	5	5	4	5	5	5	5	5	4	4	#NULL!	4	5	1	0	0	0	0	1	0	0	0	0	0	0	0	0	1	3
2		8	1	#NULL!	#NULL!	#NULL!	#NULL!	#NULL!		2	2	7	2	01864	0	4	2	4	4	2	5	5	4	5	5	5	4	3	3	3	#NULL!	1	2	0	0	1	0	0	1	1	0	0	0	0	0	0	0	1	3
2		6	1	#NULL!	#NULL!	#NULL!	#NULL!	#NULL!		2	2	1	2	45449	1	2	0	3	3	2	5	1	4	5	5	5	4	3	1	1	#NULL!	1	2	1	0	0	0	1	0	0	0	1	1	0	1	0	0	0	3
2		5	1	#NULL!	#NULL!	#NULL!	#NULL!	#NULL!		2	5	6	1	74133	3	0	2	4	4	4	5	5	5	5	5	5	5	3	3	3	#NULL!	2	6	1	0	0	0	0	0	0	0	0	0	0	0	0	0	1	3
2		7	1	#NULL!	#NULL!	#NULL!	#NULL!	#NULL!		2	4	8	1	38117	3	4	3	4	3	3	4	4	4	5	5	5	4	3	3	3	#NULL!	2	5	0	1	1	0	0	0	0	0	1	0	0	1	0	0	0	3
2		5	#NULL!	1	#NULL!	#NULL!	#NULL!	#NULL!		2	6	5	1	75235	0	0	0	2	3	2	5	5	3	4	5	5	3	3	3	4	#NULL!	1	5	1	0	0	0	0	0	0	0	1	0	0	0	0	0	0	3
2		7	1	#NULL!	#NULL!	#NULL!	#NULL!	#NULL!		2	3	4	1	33060	4	4	4	4	4	4	3	3	3	4	4	4	3	3	3	3	2	3	5	1	0	0	1	0	0	0	0	0	0	0	1	0	0	0	3
2		7	1	#NULL!	#NULL!	#NULL!	#NULL!	#NULL!		2	5	5	2	53572	3	3	3	3	3	3	4	4	4	4	5	5	4	3	3	3	2	1	5	1	0	0	0	0	0	0	0	0	0	0	0	0	0	1	3
2		4	1	#NULL!	#NULL!	#NULL!	#NULL!	#NULL!		2	2	4	2	79705	1	3	3	4	4	4	5	5	5	5	5	5	4	5	3	4	2	3	2	1	0	0	0	0	0	0	0	0	0	0	1	0	0	0	3
2		7	1	#NULL!	#NULL!	#NULL!	#NULL!	#NULL!		1	5	6	2	78745	3	4	3	4	4	4	5	5	5	5	5	5	5	3	4	3	#NULL!	3	2	1	0	0	0	0	0	0	0	0	0	0	0	0	0	1	3
2		4	1	#NULL!	#NULL!	#NULL!	#NULL!	#NULL!		1	4	6	2	43605	2	3	2	4	4	3	5	5	5	5	5	5	3	5	5	3	#NULL!	1	6	1	0	0	1	1	1	1	0	0	0	0	0	0	0	1	3
2		7	1	#NULL!	#NULL!	#NULL!	#NULL!	#NULL!		2	2	5	1	73162	1	2	1	4	1	4	2	2	2	2	4	2	2	5	2	2	2	1	6	1	0	0	0	0	0	0	0	0	0	0	0	0	0	1	3
2		3	1	#NULL!	#NULL!	#NULL!	#NULL!	#NULL!		2	2	6	1	85040	3	3	1	2	2	2	4	4	4	4	4	4	5	4	4	4	#NULL!	3	6	1	0	0	0	1	1	0	0	0	0	0	0	0	0	1	3
2		7	1	#NULL!	#NULL!	#NULL!	#NULL!	#NULL!		2	3	5	2	63128	3	3	2	4	3	3	4	3	2	5	5	5	5	4	2	2	2	3	6	1	0	0	0	0	0	0	0	0	0	0	0	0	0	1	3
2		5	1	#NULL!	#NULL!	#NULL!	#NULL!	#NULL!		2	5	6	2	21234	3	4	4	4	4	4	5	5	5	5	5	5	5	5	5	5	#NULL!	5	6	1	1	1	1	1	1	1	0	0	0	0	0	0	0	1	3
2		6	1	#NULL!	#NULL!	#NULL!	#NULL!	#NULL!		2	5	7	2	60462	3	3	2	4	4	4	5	5	5	5	5	5	5	5	5	1	1	1	5	1	0	0	0	0	0	0	0	0	0	0	0	0	0	1	3
2		6	1	#NULL!	#NULL!	#NULL!	#NULL!	#NULL!		2	2	3	2	08007	2	2	0	4	3	3	1	1	3	5	5	5	4	2	3	3	#NULL!	3	2	1	1	1	0	1	1	1	0	0	0	0	0	0	0	1	3
2		7	1	#NULL!	#NULL!	#NULL!	#NULL!	#NULL!		2	5	3	2	76182	2	2	1	3	2	2	5	5	4	5	5	5	4	3	3	2	#NULL!	3	5	1	0	0	0	0	0	0	0	0	0	0	0	0	0	1	3
2		7	1	#NULL!	#NULL!	#NULL!	#NULL!	#NULL!		2	5	7	1	02828	0	0	0	0	0	0	4	4	4	1	1	1	1	3	3	3	#NULL!	3	6	1	0	0	0	0	0	0	0	0	0	0	0	0	0	1	3
2		7	1	#NULL!	#NULL!	#NULL!	#NULL!	#NULL!		2	2	3	2	78666	2	2	2	3	3	3	4	4	3	3	3	3	4	4	3	4	#NULL!	2	1	1	0	1	0	0	1	1	0	0	0	0	0	0	0	1	3
2		5	1	#NULL!	1	#NULL!	#NULL!	#NULL!		2	2	5	2	78602	3	3	3	2	3	3	5	5	4	5	5	5	4	4	3	3	#NULL!	1	6	1	1	1	0	1	1	1	0	0	0	0	0	0	0	1	3
2		6	1	#NULL!	#NULL!	#NULL!	#NULL!	#NULL!		2	3	4	2	46060	2	3	3	3	3	3	5	4	5	5	5	5	5	5	3	3	2	3	6	0	0	1	1	1	1	0	0	1	0	0	1	0	1	0	3
2		6	1	#NULL!	#NULL!	#NULL!	#NULL!	#NULL!		2	5	11	1	59102	0	2	0	4	2	3	5	5	5	5	5	5	5	5	5	5	#NULL!	1	6	1	0	0	0	0	0	0	0	0	0	0	0	0	0	1	3
2		7	1	#NULL!	#NULL!	#NULL!	#NULL!	#NULL!		2	2	4	2	29406	2	2	2	3	3	1	2	4	3	3	4	4	3	4	4	4	#NULL!	1	5	1	0	0	0	0	0	0	0	0	0	0	0	0	0	1	3
2		7	1	#NULL!	#NULL!	#NULL!	#NULL!	#NULL!		2	2	3	2	29673	4	0	4	4	4	4	5	5	5	5	5	5	5	5	5	5	#NULL!	4	2	1	0	1	1	1	1	1	0	0	0	0	0	0	0	1	3
2		7	1	#NULL!	#NULL!	#NULL!	#NULL!	#NULL!		2	6	7	2	43537	4	4	4	4	4	3	3	3	3	4	4	4	3	3	3	3	2	2	5	1	0	1	0	0	0	0	0	0	0	0	0	0	0	1	3
2		7	1	#NULL!	#NULL!	#NULL!	#NULL!	#NULL!		2	4	3	1	14220	3	4	4	4	3	3	3	4	3	4	4	4	3	3	3	3	2	1	5	1	0	0	0	0	0	0	0	0	0	0	0	0	0	1	3
2		7	1	#NULL!	#NULL!	#NULL!	#NULL!	#NULL!		2	3	4	1	60630	3	4	3	4	4	4	5	5	3	5	5	5	3	3	3	3	2	3	5	0	0	1	1	1	1	0	0	0	0	0	0	0	0	1	3
2		7	1	#NULL!	#NULL!	#NULL!	#NULL!	#NULL!		2	6	8	2	30039	0	1	1	4	4	0	1	1	1	4	5	5	3	3	3	3	#NULL!	4	6	1	0	0	0	0	0	0	0	0	0	0	0	0	0	1	3
2		7	1	#NULL!	#NULL!	#NULL!	#NULL!	#NULL!		2	3	8	2	19958	4	4	4	4	4	4	5	5	5	5	5	5	5	4	2	2	2	3	4	1	1	1	0	0	0	0	0	1	0	0	1	0	0	0	3
2		6	1	#NULL!	#NULL!	#NULL!	#NULL!	#NULL!		2	3	7	2	23320	3	3	3	4	4	4	4	4	4	4	4	4	4	4	4	4	2	3	5	1	0	0	0	0	0	0	0	0	0	0	0	0	0	1	3
2		6	#NULL!	#NULL!	#NULL!	1	#NULL!	#NULL!		2	3	9	2	92627	3	3	3	4	3	3	4	4	3	5	5	5	3	3	3	3	#NULL!	2	6	0	0	0	0	1	0	0	0	0	1	0	1	0	0	0	3
2		8	1	#NULL!	#NULL!	#NULL!	#NULL!	#NULL!		2	5	7	1	84081	3	3	2	3	3	3	5	5	5	5	5	5	5	3	3	4	2	3	5	0	0	1	0	0	0	1	0	1	0	0	0	0	0	0	3
2		8	1	#NULL!	#NULL!	#NULL!	#NULL!	#NULL!		2	3	3	2	33917	0	2	1	4	4	4	4	4	3	5	5	5	4	3	3	3	#NULL!	2	2	0	0	1	0	0	0	0	0	0	0	0	1	0	0	0	3
2		7	1	#NULL!	#NULL!	#NULL!	#NULL!	#NULL!		2	6	6	1	46385	1	2	0	3	2	1	4	4	4	4	4	4	4	4	4	4	#NULL!	1	5	0	1	0	1	1	0	0	0	0	0	0	0	0	0	1	3
2		7	1	#NULL!	#NULL!	#NULL!	#NULL!	#NULL!		2	2	2	1	89104	0	0	0	2	2	2	3	3	3	4	4	4	3	3	3	3	1	2	6	1	1	1	1	0	1	1	0	0	0	0	0	0	0	1	3
2		7	1	#NULL!	#NULL!	#NULL!	#NULL!	#NULL!		2	2	8	1	68108	0	0	1	4	4	4	5	5	5	3	5	5	4	3	3	3	1	2	5	1	0	0	0	0	0	0	0	0	0	0	0	0	0	1	3
2		6	1	#NULL!	#NULL!	#NULL!	#NULL!	#NULL!		2	5	8	2	24064	2	2	2	4	4	2	4	3	3	4	4	4	3	3	3	2	#NULL!	3	6	1	0	0	0	0	0	0	0	1	1	1	1	0	0	0	3
2		7	1	#NULL!	#NULL!	#NULL!	#NULL!	#NULL!		2	4	8	1	92614	4	4	0	4	4	4	4	4	4	4	4	4	3	3	3	3	#NULL!	1	5	0	1	0	0	0	0	0	0	0	0	0	1	0	0	0	3
2		7	1	#NULL!	#NULL!	#NULL!	#NULL!	#NULL!		2	2	4	1	89044	2	3	2	4	4	4	4	4	3	4	4	5	3	3	3	3	#NULL!	2	6	1	0	0	0	0	0	0	0	0	0	0	0	0	0	1	3
2		6	1	#NULL!	#NULL!	#NULL!	#NULL!	#NULL!		2	3	3	2	33801	0	0	0	4	3	3	3	3	3	4	4	4	3	4	3	3	#NULL!	1	6	1	0	0	0	0	0	0	0	0	0	0	0	0	0	1	3
2		6	1	#NULL!	#NULL!	#NULL!	#NULL!	#NULL!		1	2	2	2	33527	0	2	2	4	4	4	2	2	2	4	4	4	3	2	2	2	1	4	2	1	0	0	0	0	0	0	0	0	0	0	0	0	0	1	3
2		8	1	#NULL!	#NULL!	#NULL!	#NULL!	#NULL!		2	3	4	2	44089	1	4	2	4	4	4	3	3	3	4	5	5	4	4	3	4	#NULL!	1	5	1	0	0	0	0	0	0	0	0	0	0	0	0	0	1	3
2		5	#NULL!	1	#NULL!	#NULL!	#NULL!	#NULL!		2	2	2	1	70119	2	4	4	4	4	2	1	1	1	5	5	5	5	5	5	5	#NULL!	2	6	1	0	0	0	0	0	0	0	0	0	0	0	0	0	1	3
2		6	1	#NULL!	#NULL!	#NULL!	#NULL!	#NULL!		2	2	6	2	56425	2	4	4	4	4	4	4	4	4	5	5	5	5	5	3	3	2	1	4	1	1	1	0	1	0	0	0	0	0	0	0	0	0	1	3
2		6	1	#NULL!	#NULL!	#NULL!	#NULL!	#NULL!		2	3	6	2	18510	4	4	4	4	4	4	5	5	5	5	5	5	5	5	5	5	1	5	6	1	1	1	1	1	1	1	0	1	1	1	1	1	1	0	3
2		9	1	#NULL!	#NULL!	#NULL!	#NULL!	#NULL!		2	4	4	2	85022	4	3	4	4	4	4	5	5	4	5	5	5	5	3	4	2	#NULL!	1	5	1	0	0	0	0	0	0	0	0	0	0	0	0	0	1	3
2		7	1	#NULL!	#NULL!	#NULL!	#NULL!	#NULL!		2	3	3	2	38116	4	4	4	4	4	4	5	5	5	5	5	5	4	3	2	3	2	1	5	1	0	0	0	0	0	0	0	0	0	0	0	0	0	1	3
2		6	1	#NULL!	#NULL!	#NULL!	#NULL!	#NULL!		2	2	3	2	84790	0	0	0	4	3	0	5	5	5	5	5	5	5	3	1	1	1	1	1	1	0	0	0	0	0	0	0	0	0	0	0	0	0	1	3
2		7	#NULL!	1	#NULL!	#NULL!	#NULL!	#NULL!		2	4	3	1	10027	4	4	4	4	4	4	5	5	5	5	5	5	5	1	1	1	#NULL!	1	6	1	0	0	0	0	0	0	0	0	0	0	0	0	0	1	3
2		5	1	#NULL!	#NULL!	#NULL!	#NULL!	#NULL!		2	2	8	1	12306	1	2	2	3	3	2	4	4	4	4	4	4	4	4	3	3	#NULL!	1	6	1	0	0	0	0	0	0	0	0	0	0	0	0	0	1	3
2		7	1	#NULL!	#NULL!	#NULL!	#NULL!	#NULL!		2	5	3	2	44077	4	4	2	4	4	4	5	5	3	5	5	5	4	2	1	1	#NULL!	2	5	1	0	0	0	0	0	0	0	0	0	0	0	0	0	1	3
2		7	1	#NULL!	#NULL!	#NULL!	#NULL!	#NULL!		2	3	4	2	08244	4	4	2	4	4	4	5	5	5	5	5	5	5	5	5	5	1	2	6	1	0	0	0	0	0	0	0	0	0	0	0	0	0	1	3
2		6	1	#NULL!	#NULL!	#NULL!	#NULL!	#NULL!		2	2	6	2	88008	3	4	4	4	4	4	5	5	5	5	5	5	5	3	3	3	#NULL!	1	5	1	0	0	0	0	0	0	0	0	0	0	0	0	0	1	3
2		7	1	#NULL!	#NULL!	#NULL!	#NULL!	#NULL!		2	4	5	2	97330	2	2	2	4	3	2	3	3	3	4	5	5	3	3	3	3	2	3	5	1	0	0	0	0	0	0	0	0	0	0	0	0	0	1	3
2		7	#NULL!	1	#NULL!	#NULL!	#NULL!	#NULL!		2	2	7	2	40258	0	0	0	2	2	0	5	5	5	5	5	5	5	5	4	4	2	1	6	1	0	0	0	0	0	0	0	0	0	0	0	0	0	1	3
2		7	1	#NULL!	#NULL!	#NULL!	#NULL!	#NULL!		2	3	9	1	94531	4	4	4	4	4	4	4	3	3	4	5	5	4	2	1	1	2	3	5	1	0	0	0	0	0	0	0	0	0	0	0	0	0	1	3
2		5	1	#NULL!	#NULL!	#NULL!	#NULL!	#NULL!		2	2	10	2	13039	0	0	0	4	4	4	5	5	5	5	5	5	5	5	5	5	2	2	5	1	0	0	0	0	0	0	0	0	0	0	0	0	0	1	3
2		7	1	#NULL!	#NULL!	#NULL!	#NULL!	#NULL!		2	3	5	2	78418	4	4	4	4	4	4	5	5	5	5	5	5	5	5	5	5	#NULL!	1	6	1	0	0	0	0	0	0	0	0	0	0	0	0	0	1	3
2		6	1	#NULL!	#NULL!	#NULL!	#NULL!	#NULL!		2	5	5	2	17406	0	0	0	3	0	0	4	3	3	4	4	4	4	1	1	1	#NULL!	1	6	1	0	0	1	0	0	0	0	0	0	0	1	0	1	0	3
2		7	1	#NULL!	#NULL!	#NULL!	#NULL!	#NULL!		1	2	7	1	77901	3	4	3	4	4	4	4	4	4	5	5	5	5	4	3	3	2	3	5	1	0	0	0	0	0	0	0	0	0	0	0	0	0	1	3
2		7	1	#NULL!	#NULL!	#NULL!	#NULL!	#NULL!		2	5	7	1	10025	4	4	4	4	4	4	1	5	1	1	5	5	1	1	1	1	2	1	5	1	0	0	0	0	0	0	0	0	0	0	0	0	0	1	3
2		7	1	#NULL!	#NULL!	#NULL!	#NULL!	#NULL!		2	2	10	2	44131	0	3	0	4	2	0	5	5	5	5	5	5	5	3	3	3	#NULL!	1	6	1	0	0	0	0	0	0	0	0	0	0	0	0	0	1	3
2		5	1	#NULL!	#NULL!	#NULL!	#NULL!	#NULL!		2	3	11	1	33604	4	4	3	4	4	4	3	3	3	4	5	5	1	3	1	3	2	3	5	1	0	0	0	0	0	0	0	0	0	0	0	0	0	1	3
2		7	1	#NULL!	#NULL!	#NULL!	#NULL!	#NULL!		2	4	5	2	48021	3	4	4	4	3	4	3	3	3	5	5	5	3	2	2	2	2	3	5	0	0	1	0	1	1	0	0	0	0	0	0	0	0	1	3
2		5	1	#NULL!	#NULL!	#NULL!	#NULL!	#NULL!		2	5	11	2	15237	4	4	4	3	3	3	4	4	4	4	4	4	4	2	2	2	#NULL!	1	6	1	0	0	0	0	0	0	0	0	0	0	0	0	0	1	3
2		6	1	#NULL!	#NULL!	#NULL!	#NULL!	#NULL!		2	6	4	2	34761	2	2	2	4	4	4	3	3	3	5	5	5	3	3	3	3	2	3	6	1	1	1	1	1	1	1	0	0	0	0	0	0	0	1	3
2		6	1	#NULL!	#NULL!	#NULL!	#NULL!	#NULL!		2	5	7	2	15697	1	4	2	4	4	3	4	3	4	5	5	5	2	1	1	1	1	3	5	0	0	1	0	0	0	0	0	1	1	0	1	0	0	0	3
2		7	1	#NULL!	#NULL!	#NULL!	#NULL!	#NULL!		2	2	2	2	94501	4	4	4	4	4	4	4	4	3	5	5	5	5	2	2	3	2	3	5	1	0	0	0	0	0	0	0	0	0	0	0	0	0	1	3
2		8	1	#NULL!	#NULL!	#NULL!	#NULL!	#NULL!		2	3	12	2	94558	4	3	3	4	4	4	5	5	5	5	5	5	5	4	3	3	2	1	6	1	0	1	1	1	1	1	0	0	0	0	0	0	0	1	3
2		5	1	#NULL!	#NULL!	#NULL!	#NULL!	#NULL!		2	2	2	1	39501	4	4	3	4	3	3	5	5	4	2	3	2	3	4	4	4	2	4	3	1	0	0	0	1	1	0	0	0	0	0	0	0	0	1	3
2		7	#NULL!	1	#NULL!	#NULL!	#NULL!	#NULL!		2	3	5	2	90042	0	2	0	3	2	1	4	4	4	5	5	5	5	5	5	5	#NULL!	3	5	1	0	0	0	0	0	0	0	0	0	0	0	0	0	1	3
2		7	1	#NULL!	#NULL!	#NULL!	#NULL!	#NULL!		2	3	12	1	85715	2	3	0	4	4	4	5	5	5	5	5	5	5	4	4	4	2	1	5	1	0	1	1	1	1	1	0	0	0	0	0	0	0	1	3
2		7	1	#NULL!	#NULL!	#NULL!	#NULL!	#NULL!		2	4	6	1	73118	0	0	0	4	4	4	1	1	1	5	5	5	5	1	1	1	2	3	5	0	0	1	1	1	0	0	0	0	0	0	0	0	0	1	3
2		7	1	#NULL!	#NULL!	#NULL!	#NULL!	#NULL!		2	2	2	2	19343	2	3	2	4	4	2	2	2	2	5	5	5	4	1	1	1	2	2	6	1	0	0	0	0	0	0	0	0	0	0	0	0	0	1	3
2		7	1	#NULL!	1	#NULL!	#NULL!	#NULL!		2	2	5	2	44321	3	1	1	3	3	0	4	4	4	4	4	4	3	3	2	2	#NULL!	4	5	1	0	0	0	0	0	0	0	0	0	0	0	0	0	1	3
2		7	1	#NULL!	#NULL!	#NULL!	#NULL!	#NULL!		2	5	3	2	48195	3	3	2	4	2	2	5	5	5	4	5	5	4	2	2	2	#NULL!	3	5	1	0	1	1	1	0	0	0	0	0	0	0	0	0	1	3
2		4	1	#NULL!	#NULL!	#NULL!	#NULL!	#NULL!		2	3	11	2	08882	0	3	0	3	0	0	4	4	4	5	5	5	4	5	1	1	#NULL!	4	6	1	0	0	0	0	0	0	0	0	0	0	0	0	0	1	3
2		7	1	#NULL!	#NULL!	#NULL!	#NULL!	#NULL!		2	6	11	2	19355	0	2	3	4	2	2	4	4	2	5	5	5	3	1	1	1	2	3	5	1	0	0	0	0	0	0	0	0	0	0	0	0	0	1	3
2		6	1	#NULL!	#NULL!	#NULL!	#NULL!	#NULL!		2	3	6	2	06790	1	4	2	4	3	4	1	4	3	5	5	5	5	4	3	4	2	3	5	0	1	0	0	0	0	0	0	0	0	0	0	0	0	1	3
2		8	1	#NULL!	#NULL!	#NULL!	#NULL!	#NULL!		2	2	4	2	97305	4	4	3	4	4	3	4	5	3	5	5	5	3	4	3	3	2	3	6	1	0	0	0	0	0	0	0	0	0	0	0	0	0	1	3
2		7	1	#NULL!	#NULL!	#NULL!	#NULL!	#NULL!		2	5	5	2	77088	2	2	2	3	3	3	4	4	3	5	5	5	3	4	3	3	#NULL!	2	6	1	0	0	0	0	0	0	0	0	0	0	0	0	0	1	3
2		7	1	#NULL!	#NULL!	#NULL!	#NULL!	#NULL!		2	6	6	2	97068	4	4	4	4	4	4	3	4	3	4	5	5	3	3	3	4	2	3	6	1	0	0	0	0	0	0	0	0	0	0	0	0	0	1	3
2		5	1	#NULL!	#NULL!	#NULL!	#NULL!	#NULL!		2	7	12	2	33322	0	1	3	4	3	0	4	4	4	4	4	4	3	3	3	3	1	1	5	1	0	0	0	0	0	0	0	0	0	0	0	0	0	1	3
2		7	1	#NULL!	#NULL!	#NULL!	#NULL!	#NULL!		2	7	11	2	20853	3	3	2	4	4	4	4	2	2	5	5	5	3	1	1	1	2	3	5	0	0	1	1	1	1	0	0	0	0	0	0	0	0	1	3
2		7	1	#NULL!	#NULL!	#NULL!	#NULL!	#NULL!		2	4	4	2	32953	2	2	2	2	2	2	4	4	4	4	4	4	4	3	3	3	#NULL!	1	6	1	0	0	0	0	0	0	0	0	0	0	0	0	0	1	3
2		7	1	#NULL!	#NULL!	#NULL!	#NULL!	#NULL!		2	6	12	2	21146	3	3	3	4	4	4	4	2	4	5	5	5	5	3	2	2	2	3	5	1	0	0	0	0	0	0	0	0	0	0	0	0	0	1	3
2		9	1	#NULL!	#NULL!	#NULL!	#NULL!	#NULL!		2	4	2	1	98908	4	3	2	4	4	2	5	5	5	5	5	5	5	5	4	3	2	1	6	1	0	0	0	0	0	0	0	0	0	0	0	0	0	1	3
2		7	1	#NULL!	#NULL!	#NULL!	#NULL!	#NULL!		2	3	5	2	43123	0	0	0	4	3	3	5	5	4	5	5	5	4	4	4	4	#NULL!	3	6	1	0	1	0	0	1	0	0	0	0	0	0	0	0	1	3
2		7	1	#NULL!	#NULL!	#NULL!	#NULL!	#NULL!		2	5	8	2	90706	3	2	2	3	2	3	5	4	4	5	5	5	4	3	3	3	2	3	2	1	0	0	0	0	0	0	0	0	0	0	0	0	0	1	3
2		7	1	#NULL!	#NULL!	#NULL!	#NULL!	#NULL!		2	5	4	1	53307	2	3	3	4	4	3	4	4	3	5	5	5	3	3	3	3	2	3	6	1	0	0	0	0	0	0	0	0	0	0	0	0	0	1	3
2		5	1	#NULL!	#NULL!	#NULL!	#NULL!	#NULL!		2	3	5	2	48118	0	1	0	4	3	0	5	5	4	3	4	3	2	2	2	1	2	3	5	0	1	1	0	0	0	0	0	0	0	0	1	0	0	0	3
2		5	1	#NULL!	#NULL!	#NULL!	#NULL!	#NULL!		2	2	3	2	21532	4	4	0	4	4	4	5	5	5	5	1	5	5	5	5	5	#NULL!	3	5	1	0	0	0	0	0	0	0	0	0	0	0	0	0	1	3
2		6	1	#NULL!	#NULL!	#NULL!	#NULL!	#NULL!		2	6	4	1	59801	2	2	2	3	3	3	5	5	5	4	4	4	4	4	4	4	#NULL!	3	6	1	0	0	0	0	0	0	0	0	0	0	0	0	0	1	3
2		6	1	#NULL!	#NULL!	#NULL!	#NULL!	#NULL!		2	2	6	1	77018	0	0	0	2	0	0	3	3	3	4	4	4	3	1	1	1	2	3	5	0	1	0	0	0	0	0	0	0	0	0	0	0	0	1	3
2		7	1	#NULL!	#NULL!	#NULL!	#NULL!	#NULL!		2	3	2	2	53188	3	4	0	4	4	4	5	5	5	5	5	5	5	5	5	5	2	3	6	1	0	1	1	1	1	1	0	0	0	0	0	0	0	1	3
2		6	1	#NULL!	#NULL!	#NULL!	#NULL!	#NULL!		2	6	8	2	10014	0	2	0	4	4	4	5	3	5	5	5	5	5	5	4	5	#NULL!	1	2	1	0	0	0	0	0	0	0	0	0	0	1	0	0	0	3
2		7	1	#NULL!	#NULL!	#NULL!	#NULL!	#NULL!		2	2	7	1	34952	2	3	2	4	4	4	4	4	3	4	4	4	3	3	3	3	1	1	5	1	0	0	0	0	0	0	0	0	0	0	0	0	0	1	3
2		8	1	#NULL!	#NULL!	#NULL!	#NULL!	#NULL!		2	6	5	1	45406	2	3	1	4	2	3	3	3	3	4	4	5	2	2	2	1	#NULL!	1	5	1	0	0	0	0	0	0	0	0	0	0	1	0	0	0	3
2		6	1	#NULL!	#NULL!	#NULL!	#NULL!	#NULL!		2	5	11	2	68123	3	4	2	4	2	3	4	1	2	5	5	5	3	2	2	2	2	3	5	1	0	0	0	1	1	0	0	1	0	0	1	1	1	0	3
2		7	1	#NULL!	#NULL!	#NULL!	#NULL!	#NULL!		2	2	6	2	32218	2	0	0	4	4	4	4	4	4	5	5	5	4	3	3	3	1	1	5	1	0	0	0	0	0	0	0	1	0	0	0	0	0	0	3
2		5	#NULL!	1	#NULL!	#NULL!	#NULL!	#NULL!		2	3	11	2	20721	4	4	3	4	4	4	2	3	1	5	5	5	5	1	1	1	1	4	5	1	0	0	0	0	0	0	0	0	0	0	0	0	0	1	3
2		7	#NULL!	1	#NULL!	#NULL!	#NULL!	#NULL!		2	5	3	1	15202	3	3	3	4	3	3	4	4	3	4	4	4	5	3	2	2	2	3	5	1	0	0	0	0	0	0	0	0	0	0	1	0	0	0	3
2		8	1	#NULL!	#NULL!	#NULL!	#NULL!	#NULL!		2	4	4	1	75240	2	2	1	3	2	2	4	4	3	4	4	4	3	1	1	1	2	3	5	0	1	0	0	0	0	0	0	0	0	0	0	0	0	1	3
2		7	1	#NULL!	#NULL!	#NULL!	#NULL!	#NULL!		2	3	2	2	41031	2	3	2	4	4	4	5	5	5	5	5	5	5	5	5	5	#NULL!	1	5	1	0	0	0	0	0	0	0	0	0	0	0	0	0	1	3
2		7	1	#NULL!	#NULL!	#NULL!	#NULL!	#NULL!		2	3	7	1	90745	4	4	4	4	1	3	5	5	5	5	5	5	3	3	3	3	#NULL!	4	6	1	0	0	0	0	0	0	0	1	0	0	1	0	0	0	3
2		4	1	#NULL!	#NULL!	#NULL!	#NULL!	#NULL!		2	4	7	1	52403	2	2	2	2	2	2	3	3	3	3	3	3	3	3	3	3	2	4	2	1	0	0	0	0	0	0	0	0	0	0	0	0	0	1	3
2		7	1	#NULL!	#NULL!	#NULL!	#NULL!	#NULL!		2	3	2	2	91384	3	3	2	3	3	3	5	5	5	5	5	5	5	5	5	5	#NULL!	1	1	1	0	0	0	0	0	0	0	0	0	0	0	0	0	1	3
2		8	1	#NULL!	#NULL!	#NULL!	#NULL!	#NULL!		2	3	12	2	80504	4	4	4	4	4	4	4	4	3	5	5	5	5	2	2	2	2	3	5	1	0	0	0	0	0	0	0	0	0	0	0	0	0	1	3
2		7	1	#NULL!	#NULL!	#NULL!	#NULL!	#NULL!		2	5	11	2	21043	0	1	0	3	1	4	3	4	3	5	5	5	4	2	2	2	1	1	5	1	0	0	0	0	0	0	0	0	0	0	1	1	0	0	3
2		6	1	#NULL!	#NULL!	#NULL!	#NULL!	#NULL!		2	2	2	2	46375	2	2	1	4	4	2	5	5	4	3	4	5	3	1	1	1	#NULL!	1	2	1	0	0	0	0	0	0	0	0	0	0	0	1	0	0	3
2		7	1	#NULL!	#NULL!	#NULL!	#NULL!	#NULL!		2	2	6	2	49534	2	3	3	4	3	3	5	5	3	5	5	5	3	3	3	3	#NULL!	2	5	1	0	0	0	0	0	0	0	0	0	0	0	0	0	1	3
2		6	1	#NULL!	#NULL!	#NULL!	#NULL!	#NULL!		2	3	7	2	39564	3	3	3	4	4	3	4	4	4	5	5	5	4	3	3	3	#NULL!	1	5	1	0	0	0	0	0	0	0	0	0	0	0	0	0	1	3
2		7	1	#NULL!	#NULL!	#NULL!	#NULL!	#NULL!		2	2	2	2	44906	4	4	4	4	4	4	5	5	5	5	5	5	3	1	1	1	#NULL!	3	5	1	0	0	0	0	0	0	0	0	0	0	0	0	0	1	3
2		5	1	#NULL!	#NULL!	#NULL!	#NULL!	#NULL!		2	3	12	2	78154	3	3	3	3	3	3	2	2	2	4	4	4	2	2	2	2	2	3	5	1	0	0	0	0	0	0	0	0	0	0	0	0	0	1	3
2		6	#NULL!	#NULL!	#NULL!	1	#NULL!	#NULL!		2	3	12	2	96740	2	2	2	3	2	1	4	4	4	5	5	5	4	3	3	3	#NULL!	4	5	1	1	1	1	1	1	1	0	0	0	0	0	0	0	1	3
2		3	1	#NULL!	#NULL!	#NULL!	#NULL!	#NULL!		2	1	1	1	43204	0	3	1	4	4	4	3	3	3	5	5	5	5	4	4	4	#NULL!	1	6	1	0	0	0	0	0	0	0	0	0	0	0	0	0	1	3
2		7	1	#NULL!	#NULL!	#NULL!	#NULL!	#NULL!		2	5	4	2	30338	1	3	2	4	4	4	4	4	3	4	4	4	4	2	2	2	#NULL!	3	5	0	1	0	0	0	0	0	0	0	0	0	1	0	0	0	3
2		4	1	#NULL!	#NULL!	#NULL!	#NULL!	#NULL!		2	3	3	2	37217	2	2	2	2	2	2	3	3	3	3	3	3	3	3	3	3	#NULL!	1	6	1	0	0	0	0	0	0	0	0	0	0	0	0	0	1	3
2		7	1	#NULL!	#NULL!	#NULL!	#NULL!	#NULL!		2	1	2	2	83651	4	4	4	4	4	3	5	5	5	5	5	4	5	5	5	4	#NULL!	2	5	1	0	0	0	0	0	0	0	0	0	0	0	0	0	1	3
2		7	1	#NULL!	#NULL!	#NULL!	#NULL!	#NULL!		2	6	7	2	70001	1	3	2	3	2	3	5	5	5	5	5	5	5	4	4	4	#NULL!	3	6	1	0	0	0	0	0	0	0	0	0	0	0	0	0	1	3
2		6	1	#NULL!	#NULL!	#NULL!	#NULL!	#NULL!		2	4	1	2	74012	0	4	2	4	4	2	5	5	5	5	5	5	5	5	5	5	2	3	2	1	0	0	0	0	0	0	0	0	0	0	0	0	0	1	3
2		4	1	#NULL!	#NULL!	#NULL!	#NULL!	#NULL!		2	2	3	2	23062	0	0	0	3	2	0	3	3	3	5	4	5	5	2	1	3	#NULL!	2	4	1	0	1	0	1	0	0	0	1	0	0	1	0	0	0	3
2		5	1	#NULL!	#NULL!	#NULL!	#NULL!	#NULL!		2	5	9	2	18708	2	2	2	3	2	2	3	3	3	4	4	5	3	3	2	2	2	3	5	1	0	0	0	0	0	0	0	0	0	0	0	0	0	1	3
2		6	1	#NULL!	#NULL!	#NULL!	#NULL!	#NULL!		2	5	2	2	53511	3	3	0	4	4	3	4	4	3	2	2	2	2	2	2	2	1	2	5	1	0	0	0	0	0	0	0	1	0	1	1	0	1	0	3
2		7	1	#NULL!	#NULL!	#NULL!	#NULL!	#NULL!		2	2	6	2	33626	1	2	0	3	3	4	4	4	4	4	4	4	3	4	4	4	2	1	5	1	0	1	0	1	1	0	0	0	0	0	0	0	0	1	3
2		5	1	#NULL!	#NULL!	#NULL!	#NULL!	#NULL!		2	2	3	2	14617	0	0	0	3	3	3	3	3	3	3	3	4	4	4	4	3	#NULL!	1	6	1	0	0	0	0	0	0	0	0	0	0	0	0	0	1	3
2		7	1	#NULL!	#NULL!	#NULL!	#NULL!	#NULL!		2	6	8	2	80909	3	3	3	3	3	3	5	5	5	5	5	5	5	5	5	5	2	3	5	1	0	0	0	0	0	0	0	0	0	0	0	0	0	1	3
2		7	1	#NULL!	#NULL!	#NULL!	#NULL!	#NULL!		2	6	6	1	54401	3	1	2	4	4	4	5	4	4	5	5	5	4	4	3	4	#NULL!	3	5	0	0	1	0	0	1	0	0	1	0	0	1	1	0	0	3
2		7	1	#NULL!	#NULL!	#NULL!	#NULL!	#NULL!		2	5	5	1	31909	3	4	4	4	4	4	5	5	5	5	5	5	5	1	1	1	1	2	5	1	0	0	0	0	0	0	0	0	0	0	0	0	0	1	3
2		7	#NULL!	1	#NULL!	#NULL!	#NULL!	#NULL!		2	2	2	1	25302	0	3	4	4	0	4	2	4	2	2	2	4	3	3	4	4	#NULL!	2	6	1	0	1	0	0	1	1	0	0	0	0	0	0	0	1	3
2		6	1	#NULL!	#NULL!	#NULL!	#NULL!	#NULL!		2	3	4	2	46825	2	4	3	4	4	4	1	1	1	4	5	5	1	1	1	1	1	4	1	1	0	0	0	0	0	0	0	1	0	0	1	0	1	0	3
2		3	1	#NULL!	#NULL!	#NULL!	#NULL!	#NULL!		2	6	8	2	80550	0	1	0	2	1	0	3	3	3	4	4	3	4	2	2	2	2	4	5	1	0	0	0	0	0	0	0	0	0	0	1	0	0	0	3
2		8	1	#NULL!	#NULL!	#NULL!	#NULL!	#NULL!		2	4	7	1	02446	4	4	4	4	4	4	4	4	3	5	5	5	5	2	3	3	2	3	5	1	1	1	0	0	0	0	0	0	0	0	0	0	0	1	3
2		7	1	#NULL!	#NULL!	#NULL!	#NULL!	#NULL!		2	2	11	2	28079	2	4	4	4	4	4	4	4	4	5	5	5	5	4	3	3	#NULL!	4	5	1	0	0	0	0	0	0	0	0	0	0	1	0	0	0	3
2		6	1	#NULL!	#NULL!	#NULL!	#NULL!	#NULL!		2	7	4	1	92103	4	4	3	4	3	3	3	3	3	5	5	5	3	3	3	3	2	3	5	1	0	0	0	0	1	0	0	0	0	0	0	0	0	1	3
2		8	1	#NULL!	#NULL!	#NULL!	#NULL!	#NULL!		2	3	5	2	32210	1	3	1	3	3	2	5	5	4	5	5	5	5	3	4	4	2	3	6	1	0	0	0	0	1	1	0	0	0	0	0	0	0	1	3
2		7	1	#NULL!	#NULL!	#NULL!	#NULL!	#NULL!		2	6	12	2	94583	4	3	2	4	4	4	5	5	5	5	5	5	5	3	3	3	#NULL!	2	5	1	0	0	0	0	0	0	0	0	0	0	0	0	1	0	3
2		5	1	#NULL!	#NULL!	#NULL!	#NULL!	#NULL!		2	3	8	2	44067	3	0	0	3	0	1	4	4	3	5	5	5	3	1	2	1	#NULL!	1	5	1	0	0	0	0	0	0	0	0	0	0	0	0	0	1	3
2		6	#NULL!	1	#NULL!	#NULL!	#NULL!	#NULL!		2	3	3	1	23505	3	2	3	2	2	3	3	4	3	2	3	3	3	3	3	2	#NULL!	3	6	1	0	1	1	1	1	0	0	0	0	0	1	0	0	0	3
2		6	1	#NULL!	#NULL!	#NULL!	#NULL!	#NULL!		2	3	11	2	45373	3	4	3	4	4	4	5	5	3	5	5	5	5	3	3	3	#NULL!	4	6	0	0	1	0	0	0	0	0	0	0	0	1	0	0	0	3
2		8	1	#NULL!	#NULL!	#NULL!	#NULL!	#NULL!		1	4	8	2	43016	0	3	3	4	4	4	5	5	5	5	5	5	5	4	4	4	#NULL!	4	5	1	0	0	0	0	0	0	0	0	0	0	0	0	0	1	3
2		4	1	#NULL!	#NULL!	#NULL!	#NULL!	#NULL!		2	1	3	2	46142	4	4	2	4	4	4	1	1	1	3	3	3	3	3	3	3	#NULL!	1	6	1	1	1	1	1	1	1	0	0	0	0	0	0	0	1	3
2		8	1	#NULL!	#NULL!	#NULL!	#NULL!	#NULL!		2	2	5	2	11778	1	4	1	4	4	4	5	5	5	5	5	5	5	5	5	5	2	3	5	1	1	1	1	1	1	1	0	0	0	0	0	0	0	1	3
2		7	1	#NULL!	#NULL!	#NULL!	#NULL!	#NULL!		2	5	12	2	80134	1	3	3	3	3	3	3	3	3	5	3	5	3	3	3	3	2	3	5	1	0	0	0	0	0	0	0	0	0	0	0	0	0	1	3
2		3	1	#NULL!	#NULL!	#NULL!	#NULL!	#NULL!		2	1	3	1	48895	3	2	1	1	3	1	1	4	2	4	5	5	5	3	3	3	#NULL!	1	1	0	0	0	0	1	1	0	0	0	0	0	0	0	0	1	3
2		7	1	#NULL!	#NULL!	#NULL!	#NULL!	#NULL!		2	4	11	2	12205	2	4	1	4	3	4	4	4	3	4	5	4	3	3	3	3	#NULL!	3	5	0	0	0	1	0	1	0	0	0	0	0	1	0	0	0	3
2		8	1	#NULL!	#NULL!	#NULL!	#NULL!	#NULL!		2	4	11	2	73505	0	3	0	3	3	3	5	4	5	5	5	5	4	3	3	3	#NULL!	1	5	1	0	0	0	0	0	0	0	0	0	0	1	0	0	0	3
2		8	1	#NULL!	#NULL!	#NULL!	#NULL!	#NULL!		2	5	11	1	85032	1	1	0	4	4	4	4	4	3	5	4	5	3	4	3	2	#NULL!	2	6	1	0	0	0	0	0	0	0	0	0	0	1	0	0	0	3
2		8	1	#NULL!	#NULL!	#NULL!	#NULL!	#NULL!		2	1	3	2	75656	2	4	4	4	4	2	5	5	5	5	5	5	5	1	1	1	#NULL!	2	5	1	0	0	0	0	0	0	0	0	0	0	0	0	0	1	3
2		5	1	#NULL!	#NULL!	#NULL!	#NULL!	#NULL!		2	6	12	2	30005	4	3	3	4	4	3	5	5	5	5	5	5	5	4	4	5	2	1	5	1	1	1	1	0	1	1	0	0	0	0	0	0	0	1	3
2		7	#NULL!	1	#NULL!	#NULL!	#NULL!	#NULL!		2	4	2	1	27406	3	3	3	4	4	4	1	5	1	5	5	5	5	5	5	5	2	3	6	1	0	0	0	0	0	0	0	0	0	0	0	0	0	1	3
2		4	#NULL!	#NULL!	#NULL!	1	#NULL!	#NULL!		2	2	1	2	48135	2	2	1	3	1	1	3	4	3	4	3	4	4	4	3	3	2	2	6	1	0	0	0	0	0	0	0	0	0	0	0	0	0	1	3
2		6	1	#NULL!	#NULL!	#NULL!	#NULL!	#NULL!		2	1	2	1	28516	2	4	3	4	4	3	4	4	3	4	4	5	3	3	3	3	2	3	5	1	0	0	0	0	0	0	0	0	0	0	0	0	0	1	3
2		2	#NULL!	1	#NULL!	#NULL!	#NULL!	#NULL!		2	1	3	1	46410	4	4	4	3	4	3	3	3	3	5	5	5	4	5	4	4	#NULL!	1	6	1	0	0	0	1	0	0	0	0	1	0	1	0	0	0	3
2		7	1	#NULL!	#NULL!	#NULL!	#NULL!	#NULL!		2	6	4	1	55406	2	2	2	2	2	2	3	3	3	4	4	4	3	3	3	3	2	3	5	0	1	1	0	0	1	0	0	0	0	0	0	0	0	1	3
2		4	1	#NULL!	#NULL!	#NULL!	#NULL!	#NULL!		2	5	3	2	19501	2	3	3	4	4	3	4	4	4	4	4	4	3	4	4	4	2	1	5	1	0	0	0	0	0	0	0	0	0	0	0	0	0	1	3
2		5	#NULL!	1	#NULL!	#NULL!	#NULL!	#NULL!		2	3	11	2	37042	4	4	4	4	4	4	5	5	3	5	5	5	3	3	3	3	#NULL!	1	5	1	0	0	0	0	0	0	0	0	0	0	1	0	0	0	3
2		5	1	#NULL!	#NULL!	#NULL!	#NULL!	#NULL!		2	2	5	1	53214	3	3	3	4	4	3	4	4	4	5	5	5	4	3	3	2	2	3	6	1	1	1	1	0	1	1	0	0	0	0	0	0	0	1	3
2		8	1	#NULL!	#NULL!	#NULL!	#NULL!	#NULL!		2	3	5	1	88310	2	3	2	4	2	3	5	4	4	5	5	5	5	3	3	3	2	3	5	1	0	0	0	0	0	0	0	0	0	0	0	0	0	1	3
2		5	1	#NULL!	#NULL!	#NULL!	#NULL!	#NULL!		2	3	11	2	77619	2	2	1	4	4	2	5	5	5	5	5	5	5	5	5	5	2	3	5	1	0	0	0	0	0	0	0	0	0	0	0	0	0	1	3
2		6	1	#NULL!	#NULL!	#NULL!	#NULL!	#NULL!		2	6	9	2	02472	1	3	3	4	4	2	5	5	5	3	4	4	3	1	1	1	2	3	1	1	0	0	0	0	0	0	0	0	0	0	0	0	0	1	3
2		8	1	#NULL!	#NULL!	#NULL!	#NULL!	#NULL!		2	5	5	2	27127	4	4	4	4	4	4	5	5	5	5	5	5	5	5	5	4	2	3	1	1	0	0	0	0	0	0	0	0	0	0	0	0	0	1	3
2		7	1	#NULL!	#NULL!	#NULL!	#NULL!	#NULL!		2	3	7	2	30082	1	2	0	3	2	2	2	3	3	4	4	5	3	2	2	1	#NULL!	5	5	0	1	0	1	0	1	0	0	0	0	0	1	0	0	0	3
2		2	1	#NULL!	#NULL!	#NULL!	#NULL!	#NULL!		2	2	12	2	11771	4	4	4	4	4	4	5	5	5	5	5	5	5	5	5	5	2	4	2	1	0	0	0	0	0	0	0	0	0	0	0	0	0	1	3
2		7	1	#NULL!	#NULL!	#NULL!	#NULL!	#NULL!		2	3	5	1	32937	3	3	3	3	3	3	3	3	3	4	4	4	2	2	2	2	2	3	5	1	1	0	0	0	0	0	0	1	1	0	1	1	1	0	3
2		8	1	#NULL!	#NULL!	#NULL!	#NULL!	#NULL!		2	5	9	2	75287	2	2	0	4	4	4	1	1	1	5	5	5	1	1	1	1	2	3	5	1	0	0	0	0	0	0	0	0	0	0	0	0	0	1	3
2		6	1	#NULL!	#NULL!	#NULL!	#NULL!	#NULL!		2	5	3	1	90046	2	2	2	4	3	3	3	3	3	4	4	4	3	4	3	4	#NULL!	1	6	1	0	0	0	0	0	0	0	0	0	0	0	0	0	1	3
2		7	1	#NULL!	#NULL!	#NULL!	#NULL!	#NULL!		2	2	2	2	32073	3	3	3	3	3	3	4	4	4	5	5	5	5	4	4	4	2	3	6	1	0	0	0	0	0	0	0	0	0	0	0	0	0	1	3
2		9	1	#NULL!	#NULL!	#NULL!	#NULL!	#NULL!		2	5	8	2	85251	4	4	4	4	3	4	5	5	5	5	5	5	5	3	1	2	#NULL!	3	5	1	0	0	0	0	0	0	0	0	0	0	0	0	0	1	3
2		6	1	#NULL!	#NULL!	#NULL!	#NULL!	#NULL!		2	5	2	2	08107	1	3	2	4	3	3	4	5	4	5	5	5	5	2	2	2	2	3	5	1	0	0	0	0	0	0	0	0	0	0	0	0	0	1	3
2		5	1	#NULL!	#NULL!	#NULL!	#NULL!	#NULL!		2	6	12	1	94550	4	4	4	4	4	4	4	3	2	5	5	5	5	1	1	3	2	3	6	1	1	1	1	1	1	1	0	0	0	0	0	0	0	1	3
2		7	1	#NULL!	#NULL!	#NULL!	#NULL!	#NULL!		2	6	8	2	15108	1	1	1	4	3	1	5	5	4	5	5	5	4	3	2	2	#NULL!	1	5	1	0	0	0	0	0	0	0	1	0	0	0	0	0	0	3
2		7	1	#NULL!	#NULL!	#NULL!	#NULL!	#NULL!		2	4	8	2	32976	2	2	2	4	4	4	3	3	3	5	5	5	5	1	3	3	2	3	2	1	0	0	0	0	0	0	0	0	0	0	0	0	0	1	3
2		6	1	#NULL!	#NULL!	#NULL!	#NULL!	#NULL!		2	2	2	2	85705	2	3	3	2	2	1	5	5	5	3	3	3	3	5	5	5	#NULL!	1	6	1	0	0	0	0	0	0	0	0	0	0	0	0	0	1	3
2		7	1	#NULL!	#NULL!	#NULL!	#NULL!	#NULL!		2	5	11	2	75044	4	4	3	4	3	3	4	4	4	4	4	4	4	2	2	2	#NULL!	5	6	1	0	0	0	0	0	0	0	0	0	0	0	0	0	1	3
2		4	1	#NULL!	#NULL!	#NULL!	#NULL!	#NULL!		2	5	7	2	89052	0	0	0	2	2	2	5	5	4	5	5	5	5	3	3	3	#NULL!	1	6	1	0	0	0	0	0	0	0	0	0	0	0	0	0	1	3
2		7	#NULL!	1	#NULL!	#NULL!	#NULL!	#NULL!		2	4	4	1	33311	0	1	0	0	0	0	1	4	1	4	4	3	4	4	4	4	#NULL!	1	6	1	0	0	0	0	0	0	0	0	0	0	0	0	0	1	3
2		7	1	#NULL!	#NULL!	#NULL!	#NULL!	#NULL!		2	3	3	1	92108	4	4	4	4	4	4	5	5	5	5	5	5	5	5	5	5	#NULL!	4	6	1	1	1	1	1	1	1	0	0	0	0	0	0	0	1	3
2		6	1	#NULL!	#NULL!	#NULL!	#NULL!	#NULL!		2	5	11	1	33612	1	1	0	3	2	0	1	1	1	4	5	5	2	1	1	1	2	3	5	1	0	0	0	0	0	0	0	0	0	0	0	0	0	1	3
2		7	1	#NULL!	#NULL!	#NULL!	#NULL!	#NULL!		2	6	5	1	89110	4	4	3	4	3	4	4	4	3	4	5	5	3	2	2	2	2	3	5	1	0	0	0	0	0	0	0	0	0	0	0	0	0	1	3
2		7	1	#NULL!	#NULL!	#NULL!	#NULL!	#NULL!		2	4	3	1	53220	4	4	4	4	4	2	3	4	3	5	5	5	5	3	3	3	2	3	6	0	1	0	0	1	1	0	0	0	0	0	0	0	0	1	3
2		6	1	#NULL!	#NULL!	#NULL!	#NULL!	#NULL!		2	5	3	2	82007	4	1	0	4	3	0	3	3	3	5	4	4	3	3	3	3	#NULL!	1	6	1	0	0	0	0	0	0	0	0	0	0	0	0	0	1	3
2		7	1	#NULL!	#NULL!	#NULL!	#NULL!	#NULL!		2	6	6	1	75230	2	3	2	3	3	2	4	4	4	5	5	5	4	4	3	3	#NULL!	2	6	1	0	0	0	0	0	0	0	0	0	0	0	0	0	1	3
2		8	1	#NULL!	#NULL!	#NULL!	#NULL!	#NULL!		2	3	5	2	28086	4	4	4	4	4	4	4	4	4	5	5	5	4	2	2	2	#NULL!	1	5	1	0	0	0	0	0	0	0	0	0	0	0	0	0	1	3
2		6	1	#NULL!	#NULL!	#NULL!	#NULL!	#NULL!		2	4	4	2	01960	2	3	3	3	3	3	4	4	4	4	5	5	4	3	3	3	2	3	5	1	0	0	0	0	0	0	0	0	0	0	1	0	0	0	3
2		8	1	#NULL!	#NULL!	#NULL!	#NULL!	#NULL!		2	5	8	2	89002	0	2	0	4	3	4	1	1	1	1	5	5	1	1	1	1	2	3	5	1	0	0	0	0	0	0	0	0	0	0	0	0	0	1	3
2		9	1	#NULL!	#NULL!	#NULL!	#NULL!	#NULL!		2	3	4	2	89139	3	2	1	3	3	3	4	4	4	4	4	5	5	4	4	3	#NULL!	3	6	0	0	1	0	0	1	0	0	0	0	0	1	0	0	0	3
2		3	1	#NULL!	1	#NULL!	#NULL!	#NULL!		2	5	1	2	93612	0	0	0	2	2	1	3	3	3	3	4	4	3	3	3	3	#NULL!	3	6	1	0	0	0	0	0	0	0	0	0	0	0	0	0	1	3
2		8	1	#NULL!	#NULL!	#NULL!	#NULL!	#NULL!		2	6	6	2	76182	4	3	0	4	4	4	4	2	3	4	4	4	2	2	2	2	#NULL!	2	5	0	1	0	0	0	0	0	0	0	0	0	0	1	0	0	3
2		5	#NULL!	#NULL!	1	#NULL!	#NULL!	#NULL!		2	4	8	2	77327	2	2	2	3	2	2	4	3	3	4	4	4	3	4	3	3	2	1	5	1	0	0	0	0	0	0	0	0	0	0	0	0	0	1	3
2		7	1	#NULL!	#NULL!	#NULL!	#NULL!	#NULL!		2	5	11	2	89084	2	3	2	4	4	4	5	5	5	5	5	5	5	5	5	4	2	3	5	1	0	0	0	0	0	0	0	0	0	0	0	0	0	1	3
2		6	1	#NULL!	1	#NULL!	#NULL!	#NULL!		2	3	5	1	32114	4	4	4	4	4	4	5	5	5	5	5	5	5	5	5	5	2	3	5	1	1	1	1	1	1	1	0	0	0	0	0	0	0	1	3
2		6	1	#NULL!	#NULL!	#NULL!	#NULL!	#NULL!		2	5	11	2	80503	3	3	3	3	2	1	3	3	3	4	5	4	3	3	3	3	2	4	6	1	1	1	0	0	1	0	0	0	0	0	0	0	0	1	3
2		6	1	#NULL!	#NULL!	#NULL!	#NULL!	#NULL!		2	6	8	2	30328	4	4	4	4	2	4	4	4	2	5	5	5	3	3	3	3	#NULL!	3	6	0	1	1	0	0	0	0	0	0	0	0	0	0	0	1	3
2		3	#NULL!	#NULL!	#NULL!	1	#NULL!	#NULL!		2	7	12	1	11223	4	4	4	4	4	3	5	5	5	5	5	5	5	5	5	5	#NULL!	1	5	1	1	1	1	1	1	1	0	0	0	0	0	0	0	1	3
2		7	1	#NULL!	#NULL!	#NULL!	#NULL!	#NULL!		2	3	4	2	55449	3	4	2	4	4	3	4	4	2	5	4	5	4	3	3	2	2	3	5	1	0	1	0	0	0	0	0	0	0	0	0	0	0	1	3
2		6	1	#NULL!	#NULL!	#NULL!	#NULL!	#NULL!		2	4	11	2	47905	2	3	3	4	4	4	4	4	3	5	4	5	4	5	4	5	#NULL!	1	6	1	0	0	0	0	0	0	0	0	0	0	0	0	0	1	3
2		4	1	#NULL!	#NULL!	#NULL!	#NULL!	#NULL!		1	5	2	2	32701	0	0	0	4	2	1	2	3	3	4	4	3	3	4	3	4	#NULL!	3	6	1	1	1	1	0	0	0	0	1	1	1	0	0	0	0	3
2		6	1	#NULL!	#NULL!	#NULL!	#NULL!	#NULL!		2	4	5	2	48912	2	3	1	4	3	2	5	4	3	5	5	5	3	2	2	2	#NULL!	4	5	0	0	0	1	1	0	0	0	1	0	0	1	0	0	0	3
2		5	#NULL!	#NULL!	#NULL!	1	#NULL!	#NULL!		2	5	11	1	75010	4	4	4	4	4	4	5	5	5	5	5	5	5	5	5	5	#NULL!	4	6	1	1	1	1	1	1	1	0	0	0	0	0	0	0	1	3
2		8	1	#NULL!	#NULL!	#NULL!	#NULL!	#NULL!		2	6	9	2	91321	2	2	2	4	3	4	3	4	3	4	4	4	4	5	3	3	2	3	6	1	0	0	0	0	0	0	0	0	0	0	0	0	0	1	3
2		7	1	#NULL!	#NULL!	#NULL!	#NULL!	#NULL!		2	2	6	1	11228	0	0	0	4	4	4	5	5	5	5	5	5	5	5	5	5	#NULL!	1	5	1	0	0	0	0	0	0	0	0	0	0	0	0	0	1	3
2		4	1	1	#NULL!	#NULL!	#NULL!	#NULL!		2	3	2	1	04901	2	3	1	1	2	0	5	5	3	5	5	5	3	3	3	3	#NULL!	3	6	1	1	1	1	0	1	0	0	0	0	0	0	0	0	1	3
2		8	1	#NULL!	#NULL!	#NULL!	#NULL!	#NULL!		2	2	8	2	86314	0	2	0	4	4	2	5	5	5	4	4	4	4	3	3	3	#NULL!	1	6	1	0	1	0	0	0	0	0	0	0	0	0	0	0	1	3
2		7	1	#NULL!	#NULL!	#NULL!	#NULL!	#NULL!		2	3	7	2	98052	0	0	0	4	4	4	4	4	4	5	5	5	5	3	3	3	#NULL!	4	6	1	0	0	0	0	0	0	0	0	0	0	0	0	0	1	3
2		7	1	#NULL!	#NULL!	#NULL!	#NULL!	#NULL!		2	5	8	1	11375	4	4	2	4	3	4	4	5	5	5	5	5	5	5	5	4	2	3	5	0	0	0	1	1	1	1	0	0	0	0	0	0	0	1	3
2		6	1	#NULL!	#NULL!	#NULL!	#NULL!	#NULL!		2	3	3	2	45662	0	1	0	3	3	2	5	5	5	5	5	5	5	5	5	5	#NULL!	4	6	1	0	0	0	0	0	0	0	0	0	0	0	0	0	1	3
2		8	1	#NULL!	#NULL!	#NULL!	#NULL!	#NULL!		2	6	9	2	01844	4	3	4	3	2	3	4	3	3	5	5	5	5	3	3	4	2	3	5	1	0	0	0	1	0	0	0	1	0	0	1	0	0	0	3
2		7	1	#NULL!	#NULL!	#NULL!	#NULL!	#NULL!		2	4	9	2	02360	1	3	0	4	4	4	4	3	3	5	5	5	4	3	3	3	2	3	5	1	1	1	0	0	0	0	0	1	1	0	1	0	0	0	3
2		7	1	#NULL!	#NULL!	#NULL!	#NULL!	#NULL!		2	6	6	2	44709	3	3	3	4	4	4	5	5	5	4	5	5	4	2	2	1	#NULL!	1	5	1	0	0	1	0	1	0	0	0	0	0	0	0	0	1	3
2		6	1	#NULL!	#NULL!	#NULL!	#NULL!	#NULL!		2	5	12	2	06405	2	3	3	3	2	2	4	4	4	5	5	5	4	3	3	3	#NULL!	1	6	0	0	1	0	0	0	0	0	0	0	0	0	0	0	1	3
2		8	1	#NULL!	#NULL!	#NULL!	#NULL!	#NULL!		2	2	4	1	08723	2	4	3	4	4	4	5	5	5	5	5	5	5	1	1	1	2	1	5	1	1	1	1	1	1	1	0	0	0	0	1	0	0	0	3
2		5	1	#NULL!	#NULL!	#NULL!	#NULL!	#NULL!		2	3	4	2	25045	3	4	4	4	4	4	5	5	5	5	5	5	5	5	5	3	#NULL!	3	6	1	0	0	0	0	0	0	0	0	0	0	1	0	0	0	3
2		5	1	#NULL!	#NULL!	#NULL!	#NULL!	#NULL!		2	5	11	2	89147	2	3	0	4	3	3	4	5	3	4	5	5	3	3	3	3	#NULL!	4	1	1	0	0	0	0	0	0	0	0	0	0	1	0	0	0	3
2		8	1	#NULL!	#NULL!	#NULL!	#NULL!	#NULL!		2	3	11	2	33408	3	2	4	4	4	4	5	4	3	5	4	5	4	3	3	3	#NULL!	4	2	1	0	0	0	0	0	0	0	0	0	0	1	0	0	0	3
2		7	1	#NULL!	#NULL!	#NULL!	#NULL!	#NULL!		2	4	7	2	98177	3	3	3	3	3	3	4	4	4	5	5	5	4	2	2	2	#NULL!	3	5	1	0	0	0	0	0	0	0	0	0	0	0	0	0	1	3
2		6	1	#NULL!	#NULL!	#NULL!	#NULL!	#NULL!		2	1	3	2	56258	2	4	1	4	4	4	4	2	2	5	5	5	5	4	2	2	#NULL!	4	3	1	0	1	1	1	1	0	0	0	0	0	0	0	0	1	3
2		7	1	#NULL!	#NULL!	#NULL!	#NULL!	#NULL!		2	6	4	2	94401	3	2	2	3	2	2	4	4	4	5	5	5	5	4	3	4	#NULL!	1	5	0	0	1	0	0	0	0	0	0	0	0	0	0	0	1	3
2		7	#NULL!	#NULL!	#NULL!	1	#NULL!	#NULL!		2	6	5	1	96816	3	4	3	4	3	2	4	4	3	5	5	5	4	3	3	3	2	3	5	0	1	1	1	1	1	0	0	0	0	0	1	0	0	0	3
2		7	1	#NULL!	#NULL!	#NULL!	#NULL!	#NULL!		2	3	5	2	98177	0	0	0	4	0	0	5	5	5	5	5	5	5	1	1	1	#NULL!	3	5	1	0	0	0	0	0	0	0	0	0	0	0	0	0	1	3
2		6	1	#NULL!	#NULL!	#NULL!	#NULL!	#NULL!		2	3	4	1	35045	4	4	4	4	4	4	5	5	5	5	5	5	5	5	5	5	#NULL!	4	5	1	0	0	0	0	0	0	0	0	0	0	0	0	0	1	3
2		5	1	1	1	#NULL!	#NULL!	#NULL!		2	6	6	2	77459	4	4	4	4	4	4	1	4	2	4	4	4	4	4	4	4	2	3	5	1	0	0	0	0	0	0	0	0	0	0	0	0	0	1	3
2		6	1	#NULL!	#NULL!	#NULL!	#NULL!	#NULL!		1	6	9	2	77388	4	4	4	4	4	0	5	3	5	5	5	5	4	3	3	3	2	3	2	0	0	1	0	0	1	0	0	0	0	0	0	0	0	1	3
2		3	1	#NULL!	#NULL!	#NULL!	#NULL!	#NULL!		2	5	5	2	28610	1	1	1	4	4	4	3	3	3	4	5	5	4	4	3	3	2	3	6	0	1	0	1	1	1	0	0	0	0	0	1	0	0	0	3
2		8	1	#NULL!	#NULL!	#NULL!	#NULL!	#NULL!		2	5	2	2	48312	3	4	4	4	4	2	3	3	3	4	3	3	1	1	1	1	2	3	5	1	0	0	0	0	0	0	0	0	0	0	1	0	1	0	3
2		6	1	#NULL!	#NULL!	#NULL!	#NULL!	#NULL!		2	3	3	2	97321	2	4	4	4	3	2	3	1	1	4	5	5	3	1	1	1	2	4	2	0	0	0	0	1	0	0	0	1	0	0	1	0	1	0	3
2		5	1	#NULL!	#NULL!	#NULL!	#NULL!	#NULL!		2	4	11	2	29662	0	0	0	2	2	2	4	4	3	4	4	4	3	3	3	3	2	3	5	1	0	0	0	0	0	0	0	0	0	0	1	0	0	0	3
2		7	1	#NULL!	#NULL!	#NULL!	#NULL!	#NULL!		2	2	4	2	24012	0	3	0	4	4	4	4	4	4	4	4	4	4	1	1	1	#NULL!	3	6	1	0	0	1	1	1	0	0	0	0	0	0	0	0	1	3
2		6	1	#NULL!	#NULL!	#NULL!	#NULL!	#NULL!		2	4	2	2	44004	1	1	1	2	1	0	5	3	3	5	5	5	3	5	4	3	1	1	1	1	0	0	0	0	0	0	0	0	0	0	0	0	0	1	3
2		7	1	#NULL!	#NULL!	#NULL!	#NULL!	#NULL!		2	6	6	2	27712	2	4	2	3	3	3	5	5	3	3	5	5	5	1	1	1	2	1	6	1	0	0	0	0	0	0	0	0	0	0	0	0	0	1	3
2		6	1	#NULL!	#NULL!	#NULL!	#NULL!	#NULL!		2	2	1	2	70072	3	3	0	4	4	0	5	2	4	5	5	5	5	5	5	3	1	1	3	1	1	1	0	0	0	1	0	0	0	0	0	0	0	1	3
2		7	1	#NULL!	#NULL!	#NULL!	#NULL!	#NULL!		2	2	2	1	53221	0	4	0	4	4	4	3	3	3	5	5	5	4	3	3	3	2	1	5	1	0	0	0	0	0	0	0	0	0	0	0	0	0	1	3
2		5	1	#NULL!	#NULL!	#NULL!	#NULL!	#NULL!		2	2	2	2	08723	2	0	0	3	2	1	1	1	1	5	5	5	5	5	1	3	#NULL!	2	6	1	0	0	0	0	0	0	0	0	0	0	0	0	0	1	3
2		7	1	#NULL!	#NULL!	#NULL!	#NULL!	#NULL!		2	3	2	2	31763	0	2	1	4	3	4	5	5	4	5	5	4	4	3	3	3	#NULL!	1	6	1	0	0	0	0	0	0	0	0	0	0	0	1	0	0	3
2		6	1	#NULL!	#NULL!	#NULL!	#NULL!	#NULL!		2	3	11	2	59847	3	3	3	4	4	4	5	4	5	5	5	5	5	2	2	2	2	1	6	1	0	0	0	0	0	0	0	0	0	0	0	0	0	1	3
2		6	1	#NULL!	#NULL!	#NULL!	#NULL!	#NULL!		2	4	4	1	74112	4	4	4	4	4	4	3	3	3	5	5	4	3	2	2	2	2	3	5	1	0	0	0	0	0	0	0	0	0	0	0	0	0	1	3
2		7	1	#NULL!	#NULL!	#NULL!	#NULL!	#NULL!		2	5	7	1	44805	4	4	3	4	3	4	5	5	5	5	5	5	5	3	3	3	2	3	5	1	0	0	0	0	0	0	0	0	0	0	0	0	0	1	3
2		5	1	#NULL!	#NULL!	#NULL!	#NULL!	#NULL!		2	2	7	2	16105	0	4	2	4	4	4	4	3	3	5	5	5	4	4	3	3	#NULL!	2	5	1	0	0	0	0	0	0	0	0	0	0	0	0	0	1	3
2		6	1	#NULL!	#NULL!	#NULL!	#NULL!	#NULL!		2	2	2	1	44144	2	3	0	4	4	3	5	5	5	5	5	5	5	4	4	4	2	3	6	0	0	1	0	0	1	0	0	0	0	0	0	0	0	1	3
2		7	1	#NULL!	#NULL!	#NULL!	#NULL!	#NULL!		2	5	2	2	27330	4	4	4	4	4	4	5	5	5	5	5	5	5	5	5	5	2	3	5	1	0	0	0	0	0	0	0	0	0	0	0	0	0	1	3
2		7	1	#NULL!	#NULL!	#NULL!	#NULL!	#NULL!		2	3	4	1	52802	0	0	0	4	4	4	5	5	5	5	5	5	5	5	5	5	#NULL!	4	5	1	0	0	0	0	0	0	0	0	0	0	0	0	0	1	3
2		7	1	#NULL!	#NULL!	#NULL!	#NULL!	#NULL!		2	6	4	2	29687	3	4	1	4	3	3	4	3	4	1	5	5	4	1	1	2	#NULL!	2	5	1	0	0	0	0	0	0	0	0	0	0	0	0	0	1	3
2		4	1	#NULL!	#NULL!	#NULL!	#NULL!	#NULL!		2	2	5	2	22015	4	4	4	4	4	4	5	5	5	5	5	5	5	5	5	5	#NULL!	1	6	1	1	1	1	1	1	1	0	0	0	0	0	0	0	1	3
2		5	1	#NULL!	#NULL!	#NULL!	#NULL!	#NULL!		2	5	12	2	66206	4	4	2	4	4	4	3	3	2	5	4	3	1	1	1	1	#NULL!	4	6	1	0	0	0	0	0	0	0	0	0	0	1	0	0	0	3
2		8	1	#NULL!	#NULL!	#NULL!	#NULL!	#NULL!		2	6	6	2	21601	4	4	4	4	4	4	5	5	5	5	5	5	5	3	3	3	2	3	5	1	0	1	0	0	1	0	0	0	0	0	0	0	0	1	3
2		7	1	#NULL!	#NULL!	#NULL!	#NULL!	#NULL!		2	3	3	2	97008	4	4	4	2	3	2	5	3	3	5	5	5	5	3	3	3	2	3	5	0	0	1	0	0	0	0	0	0	0	0	0	0	0	1	3
2		6	1	#NULL!	#NULL!	#NULL!	#NULL!	#NULL!		2	3	2	2	48154	4	4	4	4	4	4	4	4	2	4	4	4	3	2	2	2	#NULL!	3	5	1	0	0	0	0	0	0	0	0	0	0	0	0	0	1	3
2		6	1	#NULL!	#NULL!	#NULL!	#NULL!	#NULL!		2	5	3	2	44124	2	3	2	3	3	3	4	4	3	4	5	4	3	3	3	3	2	1	5	1	0	0	0	0	0	0	0	0	0	0	0	0	0	1	3
2		3	1	#NULL!	#NULL!	#NULL!	#NULL!	#NULL!		2	1	1	2	28090	4	4	2	4	4	4	1	1	1	1	1	1	1	5	5	5	2	4	6	1	0	0	0	0	0	0	0	0	0	0	0	0	0	1	3
2		9	1	#NULL!	#NULL!	#NULL!	#NULL!	#NULL!		2	6	8	2	70126	2	4	2	3	3	3	5	5	5	5	5	5	5	4	4	4	#NULL!	1	5	1	0	0	0	0	0	0	0	1	0	0	1	0	0	0	3
2		4	1	#NULL!	#NULL!	#NULL!	#NULL!	#NULL!		2	3	3	1	35208	4	3	3	4	4	4	4	4	3	5	5	4	4	3	2	2	#NULL!	5	1	0	1	0	0	0	0	0	0	1	0	1	1	0	1	0	3
2		6	1	#NULL!	#NULL!	#NULL!	#NULL!	#NULL!		2	5	3	1	89147	2	3	2	3	3	3	3	3	3	4	4	4	3	3	3	3	2	1	6	1	0	0	0	0	0	0	0	0	0	0	0	0	0	1	3
2		7	1	#NULL!	#NULL!	#NULL!	#NULL!	#NULL!		2	4	11	2	97123	3	0	0	3	0	0	3	3	3	3	3	3	3	3	3	3	2	1	6	1	0	1	0	0	0	0	0	0	0	0	0	0	0	1	3
2		6	1	#NULL!	#NULL!	#NULL!	#NULL!	#NULL!		2	5	2	1	78415	4	4	4	4	4	4	5	5	5	5	3	5	5	5	5	5	#NULL!	4	6	1	1	1	1	1	1	1	0	0	0	0	0	0	0	1	3
2		9	1	#NULL!	#NULL!	#NULL!	#NULL!	#NULL!		2	6	11	1	29621	0	3	1	4	4	4	5	3	3	5	5	5	3	3	3	3	2	3	5	1	0	0	0	0	0	0	0	0	0	0	0	0	0	1	3
2		7	1	#NULL!	#NULL!	#NULL!	#NULL!	#NULL!		2	4	5	2	02536	3	4	3	3	3	3	5	5	5	5	5	5	5	3	3	3	2	3	5	1	0	0	0	0	0	0	0	0	0	0	0	0	0	1	3
2		6	1	#NULL!	#NULL!	#NULL!	#NULL!	#NULL!		2	5	12	2	07040	2	2	2	4	3	3	3	3	3	5	5	5	5	3	3	3	#NULL!	1	5	1	0	0	0	0	0	0	0	0	0	0	0	0	0	1	3
2		6	1	#NULL!	#NULL!	#NULL!	#NULL!	#NULL!		2	3	3	1	32805	0	2	2	4	4	4	1	1	1	4	5	5	4	2	2	2	2	3	5	1	0	0	0	1	1	0	0	1	0	0	1	1	1	0	3
2		7	1	#NULL!	#NULL!	#NULL!	#NULL!	#NULL!		2	3	3	2	91750	0	0	0	0	0	0	1	1	1	5	5	5	5	4	4	3	#NULL!	2	5	1	0	0	0	1	0	0	0	1	1	0	1	0	0	0	3
2		8	1	#NULL!	#NULL!	#NULL!	#NULL!	#NULL!		2	3	6	2	78737	0	0	0	3	3	3	4	4	4	4	4	4	4	4	4	3	#NULL!	1	1	1	0	0	0	0	0	0	0	0	0	0	0	0	0	1	3
2		6	1	#NULL!	#NULL!	#NULL!	#NULL!	#NULL!		2	4	10	2	34734	2	3	3	4	4	4	4	2	2	4	5	5	4	2	2	2	2	3	1	0	1	0	0	0	0	0	0	0	0	0	1	0	1	0	3
2		7	1	#NULL!	#NULL!	#NULL!	#NULL!	#NULL!		2	5	4	1	76116	4	4	4	4	4	4	4	4	4	5	5	5	5	4	4	4	#NULL!	4	6	1	0	0	0	0	0	0	0	0	0	0	0	0	0	1	3
2		8	1	#NULL!	#NULL!	#NULL!	#NULL!	#NULL!		2	6	6	2	28409	4	4	4	3	3	4	4	4	3	4	4	4	3	3	3	3	#NULL!	2	5	1	0	0	0	0	0	0	0	0	0	0	0	0	0	1	3
2		7	1	#NULL!	#NULL!	#NULL!	#NULL!	#NULL!		2	5	12	2	60047	4	4	3	4	4	3	5	5	5	5	5	5	5	5	3	3	2	3	5	1	1	1	1	1	1	1	0	0	0	0	0	0	0	1	3
2		8	1	#NULL!	#NULL!	#NULL!	#NULL!	#NULL!		2	6	11	2	92879	3	2	1	4	4	4	4	3	4	4	3	4	3	4	3	2	#NULL!	4	3	1	0	0	0	0	0	0	0	0	0	1	1	1	1	0	3
2		7	1	#NULL!	#NULL!	#NULL!	#NULL!	#NULL!		2	5	12	2	07960	3	3	3	4	3	3	3	3	3	4	5	4	4	2	2	2	2	3	5	1	0	0	0	0	0	0	0	0	0	0	1	0	0	0	3
2		7	1	#NULL!	#NULL!	#NULL!	#NULL!	#NULL!		2	6	4	1	02134	2	3	2	4	3	2	3	3	3	3	5	4	3	3	3	3	2	3	5	1	0	0	0	0	0	0	0	0	0	0	0	0	0	1	3
2		8	1	#NULL!	#NULL!	#NULL!	#NULL!	#NULL!		2	3	4	2	33897	3	4	2	4	3	3	5	5	3	5	5	5	5	3	3	3	#NULL!	3	5	1	0	0	0	0	0	0	0	0	0	0	0	0	0	1	3
2		7	1	#NULL!	#NULL!	#NULL!	#NULL!	#NULL!		2	5	9	2	37067	3	4	3	4	4	4	5	5	5	5	5	5	4	2	2	3	#NULL!	1	5	1	0	0	0	0	0	0	0	1	0	0	1	0	0	0	3
2		4	1	#NULL!	#NULL!	#NULL!	#NULL!	#NULL!		2	3	1	1	55746	1	1	1	2	3	2	4	3	3	5	5	5	4	3	3	3	#NULL!	4	3	1	0	0	1	0	1	1	0	0	0	0	1	0	0	0	3
2		8	1	#NULL!	#NULL!	#NULL!	#NULL!	#NULL!		2	3	7	2	02176	3	3	3	3	3	3	4	4	3	5	5	5	4	3	3	3	2	3	5	1	0	0	0	0	0	0	0	0	0	0	0	0	0	1	3
2		7	1	#NULL!	#NULL!	#NULL!	#NULL!	#NULL!		2	6	2	1	33716	0	0	0	2	1	0	4	4	4	5	4	5	4	3	3	3	#NULL!	1	6	1	0	0	0	0	0	0	0	0	0	0	0	0	0	1	3
2		6	#NULL!	#NULL!	1	#NULL!	#NULL!	#NULL!		1	3	3	2	46901	2	3	1	4	4	2	4	4	4	5	5	5	4	2	2	2	#NULL!	4	6	1	0	0	0	0	0	0	0	0	0	0	0	0	0	1	3
2		7	1	#NULL!	#NULL!	#NULL!	#NULL!	#NULL!		2	2	3	1	97045	4	4	4	4	4	3	5	5	5	5	5	5	5	3	3	3	#NULL!	1	6	1	0	0	0	0	0	0	0	0	0	0	0	0	0	1	3
2		8	1	#NULL!	#NULL!	#NULL!	#NULL!	#NULL!		2	6	5	2	06037	3	3	3	3	3	3	5	5	5	4	4	4	4	4	4	4	2	3	3	1	1	0	0	0	0	0	0	0	0	0	1	0	1	0	3
2		7	1	#NULL!	#NULL!	#NULL!	#NULL!	#NULL!		2	5	2	1	73106	4	0	4	4	4	4	5	5	5	5	5	5	5	5	1	5	2	1	5	1	0	0	0	0	0	0	0	0	0	0	0	0	0	1	3
2		5	1	#NULL!	#NULL!	#NULL!	#NULL!	#NULL!		2	1	2	2	32702	0	0	0	2	0	0	5	1	1	5	5	5	5	5	1	1	1	1	5	1	0	0	0	0	0	0	0	0	0	0	1	0	0	0	3
2		6	1	#NULL!	#NULL!	#NULL!	#NULL!	#NULL!		2	4	9	2	80226	4	4	4	3	1	2	3	2	1	4	5	4	1	1	1	1	2	3	5	1	0	0	0	0	0	0	0	0	0	0	1	0	0	0	3
2		7	1	#NULL!	#NULL!	#NULL!	#NULL!	#NULL!		2	2	5	2	16803	1	1	0	1	0	1	4	4	4	5	4	5	3	4	4	4	1	4	5	0	0	1	0	0	1	0	0	0	0	0	0	0	0	1	3
2		7	1	#NULL!	#NULL!	#NULL!	#NULL!	#NULL!		2	4	10	2	78578	2	3	1	2	3	3	5	2	2	5	5	5	4	1	1	1	2	3	5	1	0	0	0	0	0	0	0	0	0	0	0	0	0	1	3
2		5	1	#NULL!	#NULL!	#NULL!	#NULL!	#NULL!		2	5	9	2	92069	4	3	4	4	4	4	5	5	5	5	5	5	5	5	5	5	#NULL!	2	6	0	1	1	0	1	1	0	0	0	0	0	0	0	0	1	3
2		5	1	#NULL!	#NULL!	#NULL!	#NULL!	#NULL!		2	4	2	2	32615	0	3	3	4	4	2	4	4	3	5	5	5	3	4	3	3	2	1	3	1	0	0	0	0	0	0	0	0	0	0	0	0	0	1	3
2		3	#NULL!	1	#NULL!	#NULL!	#NULL!	#NULL!		2	6	12	2	19809	4	4	4	4	4	4	5	5	5	5	5	5	4	5	4	5	2	1	1	1	1	1	1	1	1	1	0	0	0	0	0	0	0	1	3
2		7	1	#NULL!	#NULL!	#NULL!	#NULL!	#NULL!		2	2	7	2	02864	0	1	1	2	2	2	4	4	4	4	4	4	4	3	3	3	2	4	6	1	0	0	0	0	0	0	0	0	0	0	0	0	0	1	3
2		7	#NULL!	1	#NULL!	#NULL!	#NULL!	#NULL!		2	3	5	1	60615	3	4	3	4	3	3	5	4	4	4	5	5	5	5	5	5	1	4	1	0	1	1	1	0	1	0	0	0	0	0	0	0	0	1	3
2		7	1	#NULL!	#NULL!	#NULL!	#NULL!	#NULL!		2	5	11	2	80108	4	4	4	4	4	4	5	5	5	5	5	5	3	2	2	2	2	3	6	1	1	1	0	0	1	0	0	0	0	0	1	0	0	0	3
2		6	1	#NULL!	#NULL!	#NULL!	#NULL!	#NULL!		2	2	4	2	32806	0	3	0	4	4	4	5	5	5	5	5	5	5	5	5	5	1	2	1	0	0	0	0	1	0	0	0	1	0	0	0	0	0	0	3
2		5	1	#NULL!	#NULL!	#NULL!	#NULL!	#NULL!		2	3	1	1	97220	3	4	4	4	4	4	2	4	4	5	5	5	5	3	3	3	#NULL!	1	6	1	0	0	0	0	0	0	0	0	0	0	0	0	0	1	3
2		8	1	#NULL!	#NULL!	#NULL!	#NULL!	#NULL!		2	2	2	1	48212	0	0	0	3	0	0	3	3	3	3	3	3	3	3	3	3	1	1	1	1	1	1	0	0	0	0	0	0	0	0	0	0	0	1	3
2		7	1	#NULL!	#NULL!	#NULL!	#NULL!	#NULL!		2	4	4	2	48813	3	4	2	4	4	4	5	2	2	4	5	4	2	1	1	1	#NULL!	2	5	0	1	0	1	0	1	0	0	0	0	0	1	1	1	0	3
2		7	1	#NULL!	#NULL!	#NULL!	#NULL!	#NULL!		2	5	5	1	66102	1	1	1	2	2	1	4	4	4	4	4	4	4	4	4	4	#NULL!	1	5	0	1	0	0	0	0	0	0	0	0	0	0	0	0	1	3
2		6	1	#NULL!	#NULL!	#NULL!	#NULL!	#NULL!		2	5	5	1	19145	4	4	4	4	4	4	5	5	5	5	5	5	5	3	3	3	1	3	5	1	0	0	0	0	0	0	0	0	0	0	0	0	0	1	3
2		7	1	#NULL!	#NULL!	#NULL!	#NULL!	#NULL!		2	5	9	2	98034	3	1	3	3	3	3	3	4	4	4	5	5	4	3	3	3	1	3	6	1	0	0	0	0	0	0	0	0	0	0	0	0	0	1	3
2		9	1	#NULL!	#NULL!	#NULL!	#NULL!	#NULL!		2	2	2	2	03087	0	1	0	0	0	0	5	5	3	5	5	5	5	2	3	2	#NULL!	1	6	1	0	1	0	0	1	0	0	0	0	0	1	0	0	0	3
2		2	#NULL!	#NULL!	#NULL!	1	#NULL!	#NULL!		2	3	1	1	83713	0	0	0	4	2	2	2	3	3	3	5	4	3	3	3	3	#NULL!	1	6	1	0	0	0	0	0	0	0	0	0	0	0	0	0	1	3
2		5	1	#NULL!	#NULL!	#NULL!	#NULL!	#NULL!		2	5	3	1	37216	0	0	0	0	0	0	3	3	3	3	3	3	3	3	3	3	#NULL!	1	5	1	0	0	0	0	0	0	0	0	0	0	0	0	0	1	3
2		8	1	#NULL!	#NULL!	#NULL!	#NULL!	#NULL!		2	6	3	2	11756	3	4	4	4	4	4	5	5	5	5	5	5	5	1	1	1	2	3	5	1	1	1	0	0	1	0	0	0	0	0	1	0	0	0	3
2		7	1	#NULL!	#NULL!	#NULL!	#NULL!	#NULL!		2	4	5	2	97003	4	4	3	3	3	3	4	3	4	4	4	4	3	4	3	3	2	3	5	0	1	0	0	1	1	0	0	0	0	0	0	0	0	1	3
2		5	1	#NULL!	#NULL!	#NULL!	#NULL!	#NULL!		2	3	6	2	34472	3	4	3	4	4	4	5	4	4	5	5	5	5	4	3	3	2	3	6	1	0	0	0	0	0	0	0	0	0	0	0	0	0	1	3
2		7	#NULL!	1	#NULL!	#NULL!	#NULL!	#NULL!		2	4	8	1	19138	2	2	0	3	2	3	5	5	5	5	5	5	5	4	5	5	2	1	5	1	0	0	0	0	0	0	0	0	0	0	0	0	0	1	3
2		8	1	#NULL!	#NULL!	#NULL!	#NULL!	#NULL!		2	2	6	1	27511	2	3	3	3	3	3	5	5	5	5	5	5	4	5	3	3	#NULL!	3	5	1	1	1	1	0	1	1	0	0	0	0	0	0	0	1	3
2		4	#NULL!	1	#NULL!	#NULL!	#NULL!	#NULL!		2	3	1	1	33161	0	4	4	4	4	4	5	5	5	5	5	5	5	5	5	5	2	1	5	1	1	1	1	1	1	1	0	0	0	0	0	0	0	1	3
2		4	1	#NULL!	#NULL!	#NULL!	#NULL!	#NULL!		2	5	12	2	28562	3	3	2	3	4	4	4	4	4	4	4	4	4	4	3	3	1	4	6	1	0	0	0	0	0	0	0	0	0	0	0	0	0	1	3
2		8	1	#NULL!	#NULL!	#NULL!	#NULL!	#NULL!		2	3	4	1	54902	0	2	2	4	4	4	2	2	2	4	4	4	3	3	3	3	#NULL!	1	5	1	0	0	0	0	0	0	0	0	0	0	0	0	0	1	3
2		7	1	#NULL!	#NULL!	#NULL!	#NULL!	#NULL!		2	2	2	2	59102	2	2	2	3	3	3	4	4	4	5	5	5	4	4	4	4	#NULL!	2	6	1	0	0	0	0	0	0	0	0	0	0	0	0	0	1	3
2		6	1	#NULL!	#NULL!	#NULL!	#NULL!	#NULL!		2	3	1	2	85614	3	3	3	3	3	3	4	4	4	4	4	4	4	3	3	3	#NULL!	1	5	1	0	0	0	0	0	0	0	0	0	0	0	1	0	0	3
2		4	1	#NULL!	#NULL!	#NULL!	#NULL!	#NULL!		2	4	6	1	97206	2	2	1	4	4	3	3	3	3	4	4	4	4	2	2	2	#NULL!	1	5	0	0	0	1	1	0	0	0	0	1	0	1	0	1	0	3
2		6	1	#NULL!	#NULL!	#NULL!	#NULL!	#NULL!		2	3	9	2	43081	2	4	3	4	4	4	4	4	4	5	5	5	5	3	3	3	#NULL!	2	6	1	0	0	0	0	0	0	0	0	0	0	0	0	0	1	3
2		8	#NULL!	1	#NULL!	#NULL!	#NULL!	#NULL!		2	5	3	1	33056	1	3	3	4	2	0	3	3	3	4	4	4	3	2	2	2	#NULL!	2	5	1	0	0	0	0	0	0	0	0	0	0	0	0	0	1	3
2		6	#NULL!	1	#NULL!	#NULL!	#NULL!	#NULL!		2	3	6	2	47905	3	3	2	4	4	3	5	5	5	5	5	5	5	4	4	3	1	3	4	1	1	0	1	1	0	0	0	0	0	0	0	0	0	1	3
2		6	1	#NULL!	#NULL!	#NULL!	#NULL!	#NULL!		2	5	3	1	85205	0	3	1	4	4	4	3	3	1	5	5	5	3	3	1	1	2	3	6	1	0	0	0	0	0	0	0	1	0	0	1	0	0	0	3
2		3	1	#NULL!	#NULL!	#NULL!	#NULL!	#NULL!		2	5	7	2	19335	3	4	3	4	4	3	4	2	2	4	4	4	2	2	2	2	2	3	5	1	1	0	0	0	0	0	0	0	0	0	1	0	0	0	3
2		7	1	#NULL!	#NULL!	#NULL!	#NULL!	#NULL!		2	1	1	1	97322	4	4	4	4	4	2	3	3	2	4	4	4	3	3	2	2	#NULL!	1	5	1	0	0	0	0	0	0	0	0	0	0	0	0	0	1	3
2		7	1	#NULL!	#NULL!	#NULL!	#NULL!	#NULL!		2	3	4	1	33771	3	4	4	4	4	4	4	4	4	4	4	4	4	2	2	2	2	3	6	1	0	0	0	0	0	0	0	0	0	0	0	0	0	1	3
2		7	1	#NULL!	#NULL!	#NULL!	#NULL!	#NULL!		2	4	4	2	54901	1	3	3	2	2	2	4	4	2	5	5	5	4	3	3	2	#NULL!	2	5	1	0	0	0	0	0	0	0	0	0	0	0	0	0	1	3
2		3	1	#NULL!	#NULL!	#NULL!	#NULL!	#NULL!		2	2	3	2	15370	0	2	1	4	4	2	3	5	3	5	5	5	4	4	3	3	2	3	6	1	0	0	0	0	0	0	0	0	0	0	1	0	0	0	3
2		7	1	#NULL!	#NULL!	#NULL!	#NULL!	#NULL!		2	4	3	2	85743	4	3	4	4	4	4	5	5	4	5	5	5	5	3	3	3	#NULL!	1	5	1	0	0	0	0	0	0	0	0	0	0	0	0	0	1	3
2		7	1	#NULL!	#NULL!	#NULL!	#NULL!	#NULL!		2	3	3	2	49001	0	2	2	2	1	0	1	4	2	1	1	1	1	4	1	5	#NULL!	1	5	0	1	0	0	0	1	1	0	1	0	0	0	0	1	0	3
2		7	1	#NULL!	#NULL!	#NULL!	#NULL!	#NULL!		2	3	3	2	32935	3	3	3	3	3	3	1	1	1	5	5	5	1	1	1	1	2	1	5	1	0	0	0	0	0	0	0	0	0	0	1	0	1	0	3
2		6	1	#NULL!	#NULL!	#NULL!	#NULL!	#NULL!		2	7	2	2	47203	3	2	2	4	3	4	5	5	5	5	5	5	5	5	5	5	#NULL!	3	6	1	0	0	1	0	0	0	0	0	0	0	0	0	0	1	3
2		5	1	#NULL!	#NULL!	#NULL!	#NULL!	#NULL!		2	5	11	2	46845	1	3	2	4	4	4	5	5	5	5	5	5	5	1	1	1	1	1	5	1	0	0	0	0	0	0	0	0	0	0	0	0	0	1	3
2		7	1	#NULL!	#NULL!	#NULL!	#NULL!	#NULL!		2	2	8	2	74055	0	1	0	2	4	0	5	5	4	5	4	5	4	2	2	2	2	4	5	1	0	0	1	1	1	0	0	0	0	0	0	0	0	1	3
2		6	1	#NULL!	#NULL!	#NULL!	#NULL!	#NULL!		2	2	3	2	79042	2	4	2	4	4	4	3	3	3	5	4	4	3	2	2	2	#NULL!	1	5	1	0	0	0	0	0	0	0	0	0	0	0	0	0	1	3
2		7	1	#NULL!	#NULL!	#NULL!	#NULL!	#NULL!		2	5	7	2	55306	3	3	3	4	4	2	5	5	5	5	5	5	4	3	3	3	#NULL!	1	1	1	0	0	0	0	0	0	0	0	0	0	0	0	0	1	3
2		6	1	#NULL!	#NULL!	#NULL!	#NULL!	#NULL!		2	5	5	1	29607	2	4	4	4	4	3	3	4	3	4	5	5	4	3	3	3	2	3	6	1	0	0	0	0	0	0	0	0	0	0	0	0	0	1	3
2		7	1	#NULL!	#NULL!	#NULL!	#NULL!	#NULL!		2	2	5	2	55024	1	1	1	1	1	1	4	4	4	4	4	4	4	4	4	4	#NULL!	4	5	1	0	1	0	0	1	0	0	0	0	0	0	0	0	1	3
2		6	#NULL!	#NULL!	#NULL!	#NULL!	#NULL!	1		1	4	4	2	37620	0	0	0	3	3	3	5	5	5	3	5	5	3	5	5	5	1	4	5	1	0	0	0	0	0	0	0	0	0	0	1	0	0	0	3
2		6	1	#NULL!	#NULL!	#NULL!	#NULL!	#NULL!		2	3	7	2	08822	3	4	3	4	4	4	5	5	4	5	5	5	5	5	5	3	2	1	5	1	0	0	0	0	0	0	0	0	0	0	0	0	0	1	3
2		5	1	#NULL!	#NULL!	#NULL!	#NULL!	#NULL!		2	2	1	2	43062	2	2	2	2	2	2	3	3	3	3	3	3	3	3	3	3	#NULL!	1	6	1	0	0	0	0	0	0	0	0	0	0	0	0	0	1	3
2		7	1	#NULL!	#NULL!	#NULL!	#NULL!	#NULL!		2	2	3	1	52404	1	2	2	4	3	4	3	3	3	3	4	3	3	3	3	2	2	3	2	1	0	0	0	0	0	0	0	0	0	0	0	0	0	1	3
2		6	#NULL!	1	#NULL!	#NULL!	#NULL!	#NULL!		2	3	10	2	10550	4	3	4	3	2	0	1	1	3	5	5	5	3	5	2	5	2	1	6	1	1	1	1	1	1	1	0	0	0	0	0	0	0	1	3
2		7	1	#NULL!	#NULL!	#NULL!	#NULL!	#NULL!		2	6	2	2	53511	0	2	2	3	3	3	4	4	4	4	4	4	4	3	3	3	#NULL!	1	5	1	0	0	0	0	0	0	0	0	0	0	0	0	0	1	3
2		7	1	#NULL!	#NULL!	#NULL!	#NULL!	#NULL!		2	3	2	1	95820	3	0	0	1	1	1	4	4	3	4	4	4	3	3	4	2	#NULL!	4	6	1	0	0	0	0	0	0	0	0	0	0	0	0	0	1	3
2		7	1	#NULL!	#NULL!	#NULL!	#NULL!	#NULL!		2	5	2	1	92405	4	4	4	4	3	3	4	4	3	4	5	5	4	4	4	3	#NULL!	3	1	1	0	0	0	0	0	0	0	0	0	0	0	0	0	1	3
2		7	1	#NULL!	#NULL!	#NULL!	#NULL!	#NULL!		2	6	11	2	02703	2	2	2	3	3	2	4	4	4	4	4	4	4	3	3	3	2	3	5	1	0	0	0	0	0	0	0	0	0	0	0	0	0	1	3
2		6	1	#NULL!	#NULL!	#NULL!	#NULL!	#NULL!		2	3	6	2	70739	3	3	3	3	3	3	3	2	2	4	5	5	3	3	3	3	2	1	4	1	0	1	0	0	1	0	0	0	0	0	0	0	0	1	3
2		6	1	#NULL!	#NULL!	#NULL!	#NULL!	#NULL!		2	4	9	1	96003	0	0	0	0	0	0	5	5	3	5	5	5	3	1	1	1	2	3	5	1	1	1	1	1	1	1	0	0	0	0	0	0	0	1	3
2		5	1	#NULL!	#NULL!	#NULL!	#NULL!	#NULL!		2	3	6	2	20715	2	3	1	4	3	2	5	5	5	5	5	5	5	5	5	5	#NULL!	3	5	1	1	1	1	1	1	0	0	0	0	0	1	0	0	0	3
2		4	1	#NULL!	#NULL!	#NULL!	#NULL!	#NULL!		2	4	4	2	71291	0	3	1	4	3	2	2	2	2	4	5	5	2	3	3	3	#NULL!	4	3	1	0	0	0	0	0	0	0	0	0	0	0	0	0	1	3
2		7	1	#NULL!	#NULL!	#NULL!	#NULL!	#NULL!		2	6	5	2	01749	3	4	4	4	3	3	3	3	3	5	5	4	3	2	2	2	2	3	5	1	0	0	0	0	0	0	0	0	0	0	0	0	0	1	3
2		7	1	#NULL!	#NULL!	#NULL!	#NULL!	#NULL!		2	3	3	2	54476	3	2	2	1	1	1	4	4	4	5	5	5	5	3	4	3	2	4	4	1	0	0	0	0	0	0	0	0	0	0	0	0	0	1	3
2		6	1	#NULL!	#NULL!	#NULL!	#NULL!	#NULL!		2	2	5	2	54130	4	4	3	4	4	4	4	3	3	5	5	5	3	3	3	3	2	3	5	1	0	0	0	0	0	0	0	0	0	0	0	0	0	1	3
2		2	1	#NULL!	#NULL!	#NULL!	#NULL!	#NULL!		2	3	12	2	06831	3	3	4	4	4	0	3	3	3	5	5	5	5	5	5	5	2	3	5	1	1	1	1	1	1	1	0	0	0	0	0	0	0	1	3
2		4	1	#NULL!	#NULL!	#NULL!	#NULL!	#NULL!		2	5	6	2	61201	0	4	0	4	4	2	5	5	3	5	5	5	5	5	5	5	2	2	5	1	0	0	0	0	0	0	0	0	0	0	0	0	0	1	3
2		5	#NULL!	1	#NULL!	#NULL!	#NULL!	#NULL!		2	3	1	2	37043	3	4	4	4	4	4	5	5	5	5	5	5	5	5	5	5	#NULL!	2	6	1	1	1	1	1	1	1	0	0	0	0	0	0	0	1	3
2		8	1	#NULL!	#NULL!	#NULL!	#NULL!	#NULL!		2	3	4	2	97233	4	4	4	4	4	4	5	5	5	5	5	5	5	5	5	5	2	3	5	1	0	0	0	0	0	0	0	0	0	0	0	0	0	1	3
2		6	1	#NULL!	#NULL!	#NULL!	#NULL!	#NULL!		2	5	11	2	28273	3	4	3	4	4	4	4	4	4	4	4	5	5	3	3	3	#NULL!	3	5	1	0	0	0	0	0	0	0	0	0	0	1	0	0	0	3
2		5	1	#NULL!	#NULL!	#NULL!	#NULL!	#NULL!		2	4	2	2	54615	3	0	2	4	4	4	1	5	4	1	1	1	1	5	5	5	2	3	1	1	0	0	0	0	0	0	0	0	0	0	0	0	0	1	3
2		5	1	#NULL!	#NULL!	#NULL!	#NULL!	#NULL!		2	2	2	1	89106	4	4	4	4	1	3	4	4	4	5	5	5	5	3	3	3	2	3	5	1	1	1	1	1	1	1	0	0	0	0	0	0	0	1	3
2		5	1	#NULL!	#NULL!	#NULL!	#NULL!	#NULL!		2	4	8	1	15650	3	4	4	4	4	4	5	5	3	5	5	5	4	1	1	1	#NULL!	1	6	1	0	0	0	0	0	0	0	0	0	0	0	0	0	1	3
2		6	1	#NULL!	#NULL!	#NULL!	#NULL!	#NULL!		2	2	6	2	53189	1	2	1	3	2	2	5	5	5	5	5	5	5	5	5	4	#NULL!	4	6	1	0	0	0	0	0	0	0	0	0	0	0	0	0	1	3
2		4	1	#NULL!	#NULL!	#NULL!	#NULL!	#NULL!		2	3	8	2	28376	1	3	1	3	3	2	3	3	3	4	3	4	3	3	3	3	#NULL!	4	6	1	0	0	0	0	0	0	0	0	0	0	0	0	0	1	3
2		7	1	#NULL!	#NULL!	#NULL!	#NULL!	#NULL!		2	3	3	2	44094	3	3	3	3	3	3	5	5	5	5	5	5	5	5	5	5	#NULL!	1	2	1	0	1	0	0	0	1	0	0	0	0	0	0	0	1	3
2		4	1	#NULL!	#NULL!	#NULL!	#NULL!	#NULL!		2	2	2	2	32570	2	4	2	4	4	4	3	4	2	5	5	5	3	5	5	5	#NULL!	1	6	1	0	0	0	0	0	0	0	0	0	0	0	0	0	1	3
2		6	1	#NULL!	#NULL!	#NULL!	#NULL!	#NULL!		2	5	3	2	31069	4	4	0	4	4	4	5	5	5	5	5	5	5	4	5	4	2	3	5	1	0	0	0	0	0	0	0	0	0	0	0	0	0	1	3
2		7	1	#NULL!	#NULL!	#NULL!	#NULL!	#NULL!		2	5	3	1	54401	2	3	3	3	3	3	3	3	3	4	4	4	3	3	2	2	2	3	5	1	1	1	0	0	0	0	0	1	0	0	1	0	0	0	3
2		2	1	#NULL!	#NULL!	#NULL!	#NULL!	#NULL!		2	4	1	2	29073	2	0	0	4	4	1	4	4	4	4	4	5	3	3	3	3	2	4	6	1	0	0	0	0	0	0	0	0	0	0	1	0	0	0	3
2		8	1	#NULL!	#NULL!	#NULL!	#NULL!	#NULL!		2	6	7	1	94708	4	4	4	4	4	4	5	5	5	5	5	5	5	1	1	1	2	3	5	1	0	0	0	0	0	0	0	0	0	0	0	0	0	1	3
2		2	1	#NULL!	#NULL!	#NULL!	#NULL!	#NULL!		2	3	2	1	23803	3	4	3	4	4	4	4	2	3	5	5	4	3	3	3	2	#NULL!	2	6	1	0	1	0	1	1	1	0	0	0	0	0	0	0	1	3
2		7	1	#NULL!	#NULL!	#NULL!	#NULL!	#NULL!		2	3	4	2	02360	3	4	3	4	4	4	5	5	5	5	5	5	4	3	3	3	2	3	6	1	0	0	0	0	0	0	0	0	0	0	0	0	0	1	3
2		7	1	#NULL!	#NULL!	#NULL!	#NULL!	#NULL!		2	5	11	2	44070	3	4	3	4	4	4	5	5	5	5	5	5	5	4	4	3	#NULL!	1	5	1	0	0	0	0	0	0	0	0	0	0	0	0	0	1	3
2		6	1	#NULL!	#NULL!	#NULL!	#NULL!	#NULL!		2	6	4	2	37771	3	3	2	4	4	4	4	4	4	4	4	4	3	3	3	3	2	3	6	1	0	0	0	0	0	0	0	0	0	0	0	0	0	1	3
2		3	1	#NULL!	#NULL!	#NULL!	#NULL!	#NULL!		2	5	10	2	07730	0	0	0	0	0	0	3	3	3	1	1	1	1	3	3	3	#NULL!	1	1	1	1	1	1	1	1	1	0	0	0	0	0	0	0	1	3
2		3	1	#NULL!	#NULL!	#NULL!	#NULL!	#NULL!		2	2	1	2	93535	0	0	0	3	2	2	3	3	3	5	5	5	5	3	3	3	#NULL!	1	6	0	0	0	1	0	1	0	0	0	0	0	1	0	0	0	3
2		7	1	#NULL!	#NULL!	#NULL!	#NULL!	#NULL!		2	2	7	1	11421	2	2	0	4	3	3	4	4	4	4	5	4	4	2	2	2	#NULL!	3	6	1	0	0	0	0	1	0	0	1	0	0	1	0	1	0	3
2		8	1	#NULL!	#NULL!	#NULL!	#NULL!	#NULL!		2	3	3	1	94123	4	4	4	4	0	0	5	5	1	5	5	5	3	1	1	1	2	3	5	1	0	0	0	0	0	0	0	0	0	0	0	0	0	1	3
2		5	#NULL!	#NULL!	#NULL!	1	#NULL!	#NULL!		2	5	11	2	64155	3	3	3	4	4	0	3	3	3	4	5	5	3	2	3	3	2	4	4	0	1	1	0	0	0	0	0	0	0	0	1	0	1	0	3
2		6	1	#NULL!	#NULL!	#NULL!	#NULL!	#NULL!		2	3	12	2	68133	2	2	2	2	2	2	2	2	2	4	4	4	3	2	2	3	#NULL!	4	5	1	0	0	0	0	0	0	0	0	0	0	0	0	0	1	3
2		2	1	#NULL!	#NULL!	#NULL!	#NULL!	#NULL!		2	1	4	1	25276	0	1	0	4	4	4	3	3	3	3	3	3	3	3	3	3	#NULL!	1	6	1	0	0	0	0	0	0	0	1	0	0	0	0	0	0	3
2		6	#NULL!	1	#NULL!	#NULL!	#NULL!	#NULL!		2	3	1	1	23220	2	4	4	4	3	4	3	3	3	5	5	5	5	3	3	2	#NULL!	1	6	1	0	0	0	0	0	0	0	0	0	0	0	0	0	1	3
2		7	1	#NULL!	#NULL!	#NULL!	#NULL!	#NULL!		2	3	3	2	48038	4	4	4	4	4	4	4	4	4	4	4	4	2	3	2	2	2	3	5	0	1	0	0	0	1	0	0	0	0	0	1	0	0	0	3
2		5	1	#NULL!	#NULL!	#NULL!	#NULL!	#NULL!		2	2	5	2	22602	0	1	1	4	3	1	3	3	4	3	3	3	3	3	3	3	#NULL!	2	2	1	0	0	0	0	0	0	0	0	0	0	0	0	0	1	3
2		2	1	#NULL!	#NULL!	#NULL!	#NULL!	#NULL!		1	1	1	1	87121	2	2	4	4	4	4	1	4	2	1	1	1	5	5	4	4	2	1	3	1	0	0	1	1	1	0	0	0	0	0	0	0	0	1	3
2		6	1	#NULL!	#NULL!	#NULL!	#NULL!	#NULL!		2	2	4	2	28117	2	2	2	2	2	2	4	3	3	5	5	5	5	5	5	5	2	2	5	1	0	0	0	0	0	0	0	0	0	0	0	0	0	1	3
2		4	1	#NULL!	#NULL!	#NULL!	#NULL!	#NULL!		2	3	12	2	27103	3	4	2	3	2	2	3	1	4	3	3	3	3	4	4	4	#NULL!	1	5	1	0	0	0	0	0	0	0	0	0	0	0	0	0	1	3
2		4	1	#NULL!	#NULL!	#NULL!	#NULL!	#NULL!		2	3	2	1	16001	4	3	3	4	4	4	4	4	4	5	5	5	5	5	5	5	2	1	5	1	0	0	0	0	0	0	0	0	0	0	0	0	0	1	3
2		4	1	#NULL!	1	#NULL!	#NULL!	#NULL!		2	3	5	1	49269	0	2	0	3	1	0	5	5	5	5	5	5	5	5	3	2	2	1	5	1	0	0	0	0	0	0	0	0	0	0	1	0	0	0	3
2		4	1	#NULL!	#NULL!	#NULL!	#NULL!	#NULL!		2	6	9	1	96706	4	4	4	4	4	4	5	5	5	5	5	5	5	5	5	5	2	3	4	1	0	0	0	0	0	0	0	0	0	0	0	0	0	1	3
2		5	1	#NULL!	#NULL!	#NULL!	#NULL!	#NULL!		2	5	5	2	30044	2	3	2	4	4	3	4	4	4	5	5	5	4	2	2	2	#NULL!	3	6	1	0	0	0	0	0	0	0	0	0	0	0	0	0	1	3
2		7	#NULL!	#NULL!	#NULL!	#NULL!	#NULL!	1		1	3	5	2	77433	4	4	2	4	2	2	5	5	5	5	5	5	5	1	1	1	2	3	3	1	0	0	0	0	0	0	0	0	0	0	1	0	0	0	3
2		4	1	#NULL!	#NULL!	#NULL!	#NULL!	#NULL!		2	5	5	2	97330	4	4	4	4	4	4	5	5	5	5	5	5	5	2	2	2	2	3	5	1	1	1	1	1	1	1	0	0	0	0	1	0	0	0	3
2		2	#NULL!	1	#NULL!	1	#NULL!	#NULL!		2	2	6	2	96734	1	2	1	4	3	3	3	3	3	5	5	5	3	3	3	3	#NULL!	1	6	1	1	1	1	1	1	1	0	0	0	0	1	0	0	0	3
2		6	1	#NULL!	#NULL!	#NULL!	#NULL!	#NULL!		2	4	6	1	14220	1	4	3	4	4	4	5	5	5	5	5	5	5	2	2	2	2	3	5	1	0	0	0	0	0	0	0	0	0	0	1	0	1	0	3
2		3	1	#NULL!	#NULL!	#NULL!	#NULL!	#NULL!		2	3	3	2	99037	3	1	2	1	3	2	3	3	3	3	3	4	2	1	1	1	#NULL!	2	5	0	0	1	0	1	1	0	0	0	0	0	0	0	0	1	3
2		5	1	#NULL!	#NULL!	#NULL!	#NULL!	#NULL!		2	3	7	2	43081	2	3	4	4	3	2	4	4	3	5	5	5	3	1	1	1	2	4	5	1	0	0	0	0	0	0	0	0	0	0	1	0	1	0	3
2		7	1	#NULL!	#NULL!	#NULL!	#NULL!	#NULL!		2	5	4	1	99205	4	4	4	4	4	4	5	5	5	5	5	5	5	4	2	2	2	3	5	1	0	0	0	0	0	0	0	0	0	0	0	1	0	0	3
2		5	1	#NULL!	#NULL!	#NULL!	#NULL!	#NULL!		2	5	8	2	33770	3	4	2	3	3	2	4	4	4	4	5	5	3	1	1	1	#NULL!	3	5	1	0	0	0	0	0	0	0	0	0	0	0	0	0	1	3
2		6	1	#NULL!	#NULL!	#NULL!	#NULL!	#NULL!		1	4	10	2	91932	4	4	4	4	4	4	5	5	5	5	5	5	5	1	1	1	2	3	5	0	0	0	0	1	1	0	0	1	0	0	1	0	1	0	3
2		7	#NULL!	1	#NULL!	#NULL!	#NULL!	#NULL!		2	2	6	2	28075	4	4	0	4	4	2	1	1	1	5	5	5	5	1	1	1	#NULL!	1	6	1	1	1	1	0	1	1	0	0	0	0	0	0	0	1	3
2		4	1	#NULL!	1	#NULL!	1	#NULL!		2	2	2	1	94590	0	0	0	0	0	0	4	4	4	4	4	4	4	4	4	4	#NULL!	1	2	1	0	0	0	0	0	0	0	0	0	0	0	0	0	1	3
2		3	1	#NULL!	#NULL!	#NULL!	#NULL!	#NULL!		2	5	10	2	15668	2	3	1	2	2	2	4	4	4	5	5	5	4	5	5	5	2	3	6	1	0	0	0	0	0	0	0	0	0	0	0	0	0	1	3
2		6	1	#NULL!	#NULL!	#NULL!	#NULL!	#NULL!		2	5	7	2	97702	3	3	3	4	3	4	4	2	2	5	5	5	3	3	1	1	2	3	5	1	1	1	1	1	1	1	0	0	0	0	0	0	0	1	3
2		5	#NULL!	1	#NULL!	#NULL!	#NULL!	#NULL!		2	6	2	2	20720	2	0	0	4	4	4	5	5	5	5	5	5	5	3	3	3	1	1	4	1	0	1	1	1	1	1	0	0	0	0	0	0	0	1	3
2		5	1	#NULL!	#NULL!	#NULL!	#NULL!	#NULL!		2	2	5	2	43050	0	3	0	4	4	4	4	4	4	5	5	5	5	5	5	5	2	3	6	1	0	0	0	0	0	0	0	0	0	0	0	0	0	1	3
2		6	1	#NULL!	#NULL!	#NULL!	#NULL!	#NULL!		2	4	6	2	04843	2	3	2	4	4	4	4	4	3	5	5	5	4	2	2	2	2	3	2	1	0	0	0	0	0	0	0	0	0	0	0	0	0	1	3
2		8	1	#NULL!	#NULL!	#NULL!	#NULL!	#NULL!		2	5	8	2	77356	0	4	0	4	4	2	5	5	5	5	5	5	5	5	5	5	2	1	6	1	1	1	1	1	1	1	0	0	0	0	0	0	0	1	3
2		7	1	#NULL!	#NULL!	#NULL!	#NULL!	#NULL!		2	3	5	2	86325	4	4	4	4	4	4	4	4	2	4	4	4	4	2	2	2	2	2	5	1	0	0	0	0	0	0	0	0	0	0	0	0	0	1	3
2		3	1	#NULL!	#NULL!	#NULL!	#NULL!	#NULL!		2	6	11	2	07081	2	3	2	4	4	4	5	3	1	5	5	5	5	5	4	3	#NULL!	1	1	0	0	1	0	0	0	1	0	0	0	0	0	0	0	1	3
2		2	#NULL!	#NULL!	#NULL!	1	#NULL!	#NULL!		1	3	1	1	78586	0	0	0	2	0	0	5	5	5	5	5	5	5	5	5	5	2	3	5	1	1	1	1	1	1	0	0	0	0	0	1	0	0	0	3
2		5	1	#NULL!	#NULL!	#NULL!	#NULL!	#NULL!		2	1	2	1	27823	1	1	4	3	3	2	5	4	4	5	5	5	5	5	5	5	#NULL!	1	5	1	0	0	0	0	0	0	0	0	0	0	0	0	0	1	3
2		4	1	#NULL!	#NULL!	#NULL!	#NULL!	#NULL!		2	5	4	2	28105	0	2	3	4	3	4	1	1	1	3	4	4	3	1	1	1	#NULL!	4	1	0	0	1	0	0	0	0	0	0	0	0	1	0	1	0	3
2		7	1	#NULL!	#NULL!	#NULL!	#NULL!	#NULL!		2	5	10	2	94536	2	2	2	3	3	2	4	3	2	3	4	4	3	2	2	2	2	3	5	1	0	0	0	0	0	0	0	0	0	0	0	0	0	1	3
2		6	1	#NULL!	#NULL!	#NULL!	#NULL!	#NULL!		2	6	8	1	33635	3	3	3	4	4	4	5	3	3	5	5	5	5	5	3	3	#NULL!	1	6	1	0	0	0	0	0	0	0	0	0	0	0	0	0	1	3
2		4	1	#NULL!	#NULL!	#NULL!	#NULL!	#NULL!		2	2	3	1	38462	0	2	0	3	3	3	5	2	5	5	5	5	5	5	5	5	#NULL!	3	5	1	0	0	0	0	0	0	0	0	0	0	0	0	0	1	3
2		4	1	#NULL!	#NULL!	#NULL!	#NULL!	#NULL!		2	5	5	1	48910	2	0	0	4	3	4	5	4	4	5	5	5	4	3	3	3	#NULL!	1	5	1	0	0	0	0	0	0	0	0	0	0	1	0	0	0	3
2		5	1	#NULL!	#NULL!	#NULL!	#NULL!	#NULL!		2	3	12	2	60102	3	4	3	4	4	4	5	5	5	5	5	5	5	5	4	4	2	1	6	1	0	0	0	0	0	0	0	0	0	0	0	0	0	1	3
2		2	1	#NULL!	#NULL!	#NULL!	#NULL!	#NULL!		2	6	5	2	70458	2	1	1	0	1	0	3	4	3	2	1	2	2	5	3	4	#NULL!	2	4	1	1	1	1	1	1	1	0	0	0	0	0	0	0	1	3
2		3	#NULL!	#NULL!	#NULL!	1	#NULL!	#NULL!		2	3	3	1	94546	4	4	3	4	4	4	5	5	5	5	5	5	5	5	5	5	#NULL!	4	5	1	1	1	1	1	1	1	0	0	0	0	0	0	0	1	3
2		3	#NULL!	1	#NULL!	#NULL!	#NULL!	#NULL!		2	6	4	2	07052	2	2	2	4	4	4	1	5	3	4	5	4	5	3	2	2	#NULL!	1	5	1	0	0	0	0	0	0	0	0	0	0	0	0	0	1	3
2		8	1	#NULL!	#NULL!	#NULL!	#NULL!	#NULL!		2	5	9	2	30606	2	3	1	4	4	4	3	3	3	5	5	5	5	3	3	3	2	3	5	1	0	0	0	0	0	0	0	0	0	0	0	0	0	1	3
2		5	1	#NULL!	#NULL!	#NULL!	#NULL!	#NULL!		2	5	12	2	17543	3	3	3	4	4	4	3	3	2	5	5	5	5	4	2	2	2	3	5	1	1	1	1	1	1	1	0	0	0	0	1	0	0	0	3
2		8	1	#NULL!	#NULL!	#NULL!	#NULL!	#NULL!		2	2	5	1	53227	4	4	4	4	3	3	5	5	3	5	5	5	4	3	4	3	#NULL!	2	5	1	0	0	0	0	0	0	0	0	0	0	0	0	0	1	3
2		6	#NULL!	#NULL!	1	#NULL!	#NULL!	#NULL!		2	3	10	2	15235	0	2	1	3	2	3	1	5	2	3	5	1	1	3	2	5	#NULL!	3	6	0	1	0	0	0	0	0	0	0	0	0	0	0	0	1	3
2		4	#NULL!	1	#NULL!	#NULL!	#NULL!	#NULL!		2	6	10	2	20770	3	3	3	4	3	4	5	5	5	5	5	5	5	5	4	4	#NULL!	1	5	1	1	1	1	1	1	1	0	0	0	0	0	0	0	1	3
2		5	1	#NULL!	#NULL!	#NULL!	#NULL!	#NULL!		2	5	5	2	37043	2	4	4	4	4	4	5	5	5	5	5	5	5	5	5	5	#NULL!	1	6	0	0	1	1	1	1	0	0	0	0	0	1	0	1	0	3
2		8	#NULL!	1	#NULL!	#NULL!	#NULL!	#NULL!		2	5	6	1	75241	0	0	0	0	0	0	3	3	3	3	3	3	3	3	3	3	#NULL!	1	5	1	0	0	0	0	0	0	0	0	0	0	0	0	0	1	3
2		9	1	#NULL!	#NULL!	#NULL!	#NULL!	#NULL!		2	6	12	2	91006	4	4	4	4	4	4	5	5	5	5	5	5	5	3	3	1	2	3	6	1	0	0	0	0	0	0	0	0	0	0	0	0	0	1	3
2		7	1	#NULL!	#NULL!	#NULL!	#NULL!	#NULL!		2	4	10	1	78746	4	4	3	4	4	3	4	4	2	4	5	5	2	2	2	2	2	3	5	1	0	0	0	0	0	0	0	0	0	0	1	0	0	0	3
2		8	1	#NULL!	#NULL!	#NULL!	#NULL!	#NULL!		2	5	5	2	94591	3	4	0	4	4	4	5	3	3	5	5	5	3	2	2	2	#NULL!	2	5	1	0	0	0	0	0	0	0	0	0	0	1	0	1	0	3
2		6	1	#NULL!	#NULL!	#NULL!	#NULL!	#NULL!		2	4	5	1	98503	3	3	3	4	3	4	5	5	4	5	5	5	3	5	5	5	2	4	5	1	0	0	0	0	0	0	0	0	0	0	1	0	1	0	3
2		5	#NULL!	1	#NULL!	#NULL!	#NULL!	#NULL!		2	6	5	1	37207	3	4	4	4	4	4	4	4	3	5	5	5	3	2	2	2	2	3	2	1	0	0	0	0	0	0	0	0	0	0	0	0	0	1	3
2		7	1	#NULL!	#NULL!	#NULL!	#NULL!	#NULL!		2	4	5	2	17111	2	3	3	4	4	4	3	3	3	4	4	4	4	4	3	4	2	3	6	1	0	0	1	1	1	0	0	0	0	0	0	0	0	1	3
2		3	#NULL!	1	#NULL!	#NULL!	#NULL!	#NULL!		2	2	1	1	24592	4	4	4	4	4	4	1	1	1	5	5	5	5	1	1	5	#NULL!	1	6	1	1	1	1	1	1	1	0	0	0	0	0	0	0	1	3
2		4	1	#NULL!	#NULL!	#NULL!	#NULL!	#NULL!		2	4	7	2	15102	2	2	2	3	3	2	4	4	3	4	4	4	3	3	3	3	2	3	2	1	0	0	0	0	0	0	0	0	0	0	0	0	0	1	3
2		6	1	#NULL!	#NULL!	#NULL!	#NULL!	#NULL!		2	6	4	1	64504	3	2	2	4	3	3	4	3	3	5	5	5	3	2	2	2	2	5	2	1	0	0	0	0	0	0	0	0	0	0	0	0	0	1	3
2		7	1	#NULL!	#NULL!	#NULL!	#NULL!	#NULL!		2	3	4	2	28540	2	4	3	4	4	2	1	1	1	5	5	5	5	3	1	1	2	3	6	1	1	1	1	1	1	1	0	0	0	0	0	0	0	1	3
2		2	1	#NULL!	#NULL!	#NULL!	#NULL!	#NULL!		2	5	5	1	97058	2	2	1	3	3	3	4	4	4	4	4	4	4	4	4	4	2	1	6	0	1	1	0	0	1	1	0	0	0	0	0	0	0	1	3
2		7	1	#NULL!	#NULL!	#NULL!	#NULL!	#NULL!		2	2	7	2	70062	0	0	0	3	3	3	4	4	4	4	5	5	5	5	5	5	#NULL!	1	5	0	0	0	0	0	1	0	0	0	0	0	0	0	0	1	3
2		8	1	#NULL!	#NULL!	#NULL!	#NULL!	#NULL!		2	3	4	1	91381	3	3	3	3	3	3	4	4	4	5	5	5	4	3	3	3	#NULL!	1	6	1	0	0	0	0	0	0	0	0	0	0	0	0	0	1	3
2		6	1	#NULL!	#NULL!	#NULL!	#NULL!	#NULL!		2	6	11	2	30062	3	3	3	2	2	2	5	5	5	5	5	5	5	5	5	5	#NULL!	1	2	1	0	1	1	0	1	1	0	0	0	0	0	0	0	1	3
2		6	1	#NULL!	#NULL!	#NULL!	#NULL!	#NULL!		2	2	8	2	45013	4	4	4	4	4	4	5	4	3	5	5	5	4	3	1	1	2	3	5	1	0	0	0	0	0	0	0	0	0	0	0	0	0	1	3
2		7	1	#NULL!	#NULL!	#NULL!	#NULL!	#NULL!		2	3	6	1	53216	2	2	2	4	3	4	4	4	3	4	3	4	4	2	2	2	#NULL!	1	5	1	0	0	0	0	0	0	0	0	0	0	0	0	0	1	3
2		7	1	#NULL!	#NULL!	#NULL!	#NULL!	#NULL!		2	4	11	2	78660	4	4	0	4	4	4	2	2	2	4	4	4	2	2	2	2	1	3	5	1	0	0	0	0	1	1	0	0	0	0	0	0	0	1	3
2		8	1	#NULL!	#NULL!	#NULL!	#NULL!	#NULL!		2	6	3	2	55426	3	3	3	3	3	3	4	4	4	5	5	5	5	4	4	2	#NULL!	2	6	0	0	1	0	0	0	0	0	0	0	1	1	0	1	0	3
2		3	1	#NULL!	#NULL!	#NULL!	#NULL!	#NULL!		2	4	1	2	61614	2	3	3	4	4	4	4	4	4	5	5	5	5	2	2	2	#NULL!	2	6	1	0	0	0	0	0	0	0	0	0	0	0	0	0	1	3
2		7	1	#NULL!	#NULL!	#NULL!	#NULL!	#NULL!		2	3	6	2	45065	1	3	0	3	2	1	4	4	4	5	5	5	3	1	1	1	#NULL!	4	5	1	0	0	0	0	1	1	0	0	0	0	0	0	0	1	3
2		6	1	#NULL!	#NULL!	#NULL!	#NULL!	#NULL!		2	3	2	2	21740	3	4	4	4	4	4	4	3	3	5	5	5	5	3	1	1	2	1	6	1	0	1	1	0	1	0	0	0	0	0	0	0	0	1	3
2		8	1	#NULL!	#NULL!	#NULL!	#NULL!	#NULL!		2	6	5	2	89506	4	4	4	4	4	3	4	4	3	4	5	4	3	3	2	3	2	3	5	1	1	0	0	0	0	0	0	0	0	0	0	0	0	1	3
2		7	1	#NULL!	#NULL!	#NULL!	#NULL!	#NULL!		2	5	10	2	28115	2	4	4	4	4	4	5	5	5	5	5	5	5	5	5	5	2	4	6	1	1	1	1	1	1	1	0	0	0	0	0	0	0	1	3
2		6	1	#NULL!	#NULL!	#NULL!	#NULL!	#NULL!		2	2	3	2	45601	3	3	2	4	3	2	2	2	2	3	4	4	3	3	3	3	#NULL!	4	6	1	0	0	0	0	0	0	0	0	0	0	0	0	0	1	3
2		7	1	#NULL!	#NULL!	#NULL!	#NULL!	#NULL!		2	2	3	1	47714	0	0	0	0	0	0	4	5	3	5	5	5	5	3	3	3	#NULL!	2	6	1	0	0	0	0	0	0	0	0	0	0	0	0	0	1	3
2		5	1	#NULL!	#NULL!	#NULL!	#NULL!	#NULL!		2	6	8	2	38017	2	2	2	4	4	4	5	5	5	5	5	5	5	3	3	3	#NULL!	4	5	1	0	0	0	0	0	0	0	1	0	0	1	0	0	0	3
2		4	#NULL!	1	#NULL!	#NULL!	#NULL!	#NULL!		2	2	3	1	23462	2	3	1	4	4	1	5	5	5	3	5	5	5	5	4	3	1	4	6	1	0	1	1	0	1	0	0	0	0	0	1	0	0	0	3
2		7	1	#NULL!	1	#NULL!	#NULL!	#NULL!		2	2	4	1	74112	3	2	2	1	1	2	4	4	3	5	5	5	4	4	2	3	2	4	5	1	0	0	0	1	1	0	0	1	0	0	1	0	1	0	3
2		7	1	#NULL!	#NULL!	#NULL!	#NULL!	#NULL!		2	4	7	2	89434	2	3	1	4	2	2	4	4	3	5	4	5	3	3	3	3	#NULL!	1	6	1	0	0	0	0	0	0	0	0	0	0	0	0	0	1	3
2		4	#NULL!	1	#NULL!	#NULL!	#NULL!	#NULL!		1	5	8	2	62234	3	3	2	2	3	3	4	4	3	5	5	5	3	3	4	4	#NULL!	3	5	1	0	0	0	0	0	0	0	0	0	0	0	0	0	1	3
2		4	1	#NULL!	#NULL!	#NULL!	#NULL!	#NULL!		2	4	9	2	39232	2	4	4	4	4	3	4	4	4	1	5	5	3	1	1	1	#NULL!	3	6	1	0	0	0	0	0	0	0	0	0	0	0	0	0	1	3
2		8	1	#NULL!	#NULL!	#NULL!	#NULL!	#NULL!		2	6	3	1	72205	2	2	1	3	3	2	4	4	4	5	5	5	4	4	4	4	2	3	6	1	1	1	0	0	1	0	0	0	0	0	0	0	0	1	3
2		7	#NULL!	1	#NULL!	#NULL!	#NULL!	#NULL!		2	5	7	1	21213	2	3	2	4	4	4	5	5	5	5	5	5	5	5	3	4	2	1	5	1	0	0	0	0	0	0	0	0	0	0	0	0	0	1	3
2		2	1	#NULL!	#NULL!	#NULL!	#NULL!	#NULL!		2	2	11	2	89012	2	2	2	3	2	2	4	4	4	3	5	5	4	3	2	2	2	3	6	1	1	0	0	0	0	0	0	0	0	0	0	0	0	1	3
2		8	1	#NULL!	#NULL!	#NULL!	#NULL!	#NULL!		2	5	7	2	60015	2	3	2	3	3	3	5	5	5	5	5	5	5	5	5	3	1	2	6	1	1	1	1	1	1	1	0	0	0	0	0	0	0	1	3
2		7	1	#NULL!	#NULL!	#NULL!	#NULL!	#NULL!		2	7	8	1	74136	4	4	4	4	4	3	2	2	2	5	5	5	5	4	2	3	2	3	5	1	1	0	0	1	0	0	0	0	0	0	1	1	0	0	3
2		4	1	#NULL!	#NULL!	#NULL!	#NULL!	#NULL!		2	2	8	1	24014	1	3	4	4	4	4	3	2	2	5	5	5	3	4	2	4	#NULL!	2	5	1	0	0	0	0	0	0	0	0	0	0	1	0	0	0	3
2		6	1	#NULL!	1	#NULL!	#NULL!	#NULL!		2	2	1	2	48883	4	4	4	4	4	4	5	5	5	5	5	5	5	5	5	5	#NULL!	1	6	1	1	1	1	1	1	1	0	0	0	0	0	0	0	1	3
2		3	1	#NULL!	#NULL!	#NULL!	#NULL!	#NULL!		2	2	2	2	43228	0	1	0	2	4	3	1	2	1	1	1	1	1	5	5	5	#NULL!	4	5	1	0	0	0	0	0	0	0	0	0	0	0	0	0	1	3
2		7	1	#NULL!	#NULL!	#NULL!	#NULL!	#NULL!		2	3	4	2	59801	3	3	3	3	3	3	4	4	3	5	5	5	4	3	3	3	2	3	5	0	1	0	0	0	1	0	0	0	0	0	0	0	0	1	3
2		6	1	#NULL!	#NULL!	#NULL!	#NULL!	#NULL!		2	5	10	2	27529	0	0	0	3	4	4	1	3	2	5	5	5	4	5	1	3	#NULL!	1	4	1	1	1	1	1	1	1	0	0	0	0	0	0	0	1	3
2		3	1	#NULL!	#NULL!	#NULL!	#NULL!	#NULL!		2	5	6	2	80226	0	0	0	2	2	2	4	4	4	4	5	5	3	4	3	3	#NULL!	4	1	1	0	0	0	0	0	0	0	0	0	0	0	0	0	1	3
2		4	1	#NULL!	#NULL!	#NULL!	#NULL!	#NULL!		2	4	6	2	95834	3	3	2	3	3	3	4	4	3	4	4	4	3	3	3	3	#NULL!	4	1	1	0	0	0	0	0	0	0	0	0	0	0	0	0	1	3
2		5	1	#NULL!	#NULL!	#NULL!	#NULL!	#NULL!		2	5	9	2	83605	2	3	2	4	4	4	4	4	4	4	4	4	4	2	2	2	#NULL!	3	5	1	0	0	0	0	0	0	0	1	0	0	1	0	0	0	3
2		6	#NULL!	1	#NULL!	#NULL!	#NULL!	#NULL!		2	3	4	2	34668	4	4	4	4	4	4	5	5	5	5	5	5	5	5	4	5	2	1	6	1	1	1	1	1	1	1	0	0	0	0	0	0	0	1	3
2		8	1	#NULL!	#NULL!	#NULL!	#NULL!	#NULL!		2	6	4	2	37167	4	4	4	4	4	4	5	5	5	5	5	5	5	3	3	3	#NULL!	1	5	1	0	0	0	0	0	0	0	0	0	0	0	0	0	1	3
2		3	1	#NULL!	#NULL!	#NULL!	#NULL!	#NULL!		2	5	5	2	72019	0	0	0	1	1	1	2	3	4	4	4	4	3	4	3	3	2	3	5	1	1	1	1	1	1	1	0	0	0	0	0	0	0	1	3
2		7	1	#NULL!	#NULL!	#NULL!	#NULL!	#NULL!		2	6	11	2	08033	2	4	3	4	3	4	5	5	5	5	5	5	5	3	3	3	2	3	5	1	0	0	0	0	0	0	0	0	0	0	0	0	0	1	3
2		6	#NULL!	#NULL!	1	#NULL!	#NULL!	#NULL!		1	4	9	2	95405	0	4	4	4	4	0	5	5	5	5	5	5	5	5	5	5	#NULL!	4	2	1	0	0	0	0	0	0	0	0	0	0	0	0	0	1	3
2		8	1	#NULL!	1	#NULL!	#NULL!	#NULL!		2	3	10	2	34288	2	2	0	4	2	2	4	4	4	4	5	5	4	3	2	2	#NULL!	3	5	1	0	0	0	0	0	0	0	0	0	0	0	0	0	1	3
2		3	1	#NULL!	#NULL!	#NULL!	#NULL!	#NULL!		2	1	2	1	77009	0	0	0	1	0	0	3	3	3	3	3	3	3	3	3	3	2	3	5	1	0	0	0	0	0	0	0	0	0	0	0	0	0	1	3
2		4	1	#NULL!	#NULL!	#NULL!	#NULL!	#NULL!		2	6	12	1	02149	2	3	3	4	4	3	4	2	2	4	5	5	3	2	2	2	2	3	3	1	0	0	0	0	0	0	0	0	0	0	0	0	0	1	3
2		5	1	#NULL!	#NULL!	#NULL!	#NULL!	#NULL!		1	4	7	2	91367	2	4	4	4	4	4	4	4	4	5	5	5	5	3	3	3	2	3	5	1	1	1	0	0	1	1	0	0	0	0	0	0	0	1	3
2		7	1	#NULL!	#NULL!	#NULL!	#NULL!	#NULL!		2	6	3	1	31907	4	4	3	4	4	4	4	4	3	4	5	5	4	3	1	1	1	3	5	1	0	0	0	0	0	0	0	0	0	0	0	0	0	1	3
2		3	1	#NULL!	#NULL!	#NULL!	#NULL!	#NULL!		2	2	1	1	12205	2	3	3	1	1	2	3	2	3	2	3	4	3	3	3	3	#NULL!	3	5	1	0	0	0	0	0	0	0	0	0	0	0	0	0	1	3
2		3	1	#NULL!	#NULL!	#NULL!	#NULL!	#NULL!		2	5	5	2	71448	2	4	4	4	2	2	5	5	3	4	5	5	3	2	3	2	2	3	6	1	0	1	0	0	1	0	0	0	0	0	0	0	0	1	3
2		7	1	#NULL!	#NULL!	#NULL!	#NULL!	#NULL!		2	6	10	2	60091	3	2	2	3	2	3	4	4	4	4	5	4	4	2	2	2	2	3	5	1	0	0	0	0	0	0	0	1	0	0	0	0	0	0	3
2		2	#NULL!	#NULL!	#NULL!	1	#NULL!	#NULL!		2	3	3	2	85303	3	3	3	3	3	3	3	4	2	1	3	4	4	5	5	5	2	4	6	0	1	0	1	0	1	0	0	0	0	0	0	0	0	1	3
2		6	1	#NULL!	#NULL!	#NULL!	#NULL!	#NULL!		2	3	11	2	98374	0	1	1	4	4	1	5	3	4	5	5	5	4	5	4	3	#NULL!	1	3	1	0	0	0	0	1	1	0	0	0	0	0	0	0	1	3
2		5	1	#NULL!	#NULL!	#NULL!	#NULL!	#NULL!		2	6	9	1	23704	0	0	0	4	4	4	4	3	3	4	4	4	4	3	2	3	2	3	6	0	1	0	0	0	0	0	0	0	0	0	0	0	0	1	3
2		4	1	#NULL!	#NULL!	#NULL!	#NULL!	#NULL!		2	5	10	2	06801	2	2	0	1	1	0	4	4	4	4	5	5	4	3	3	3	#NULL!	2	5	1	0	0	0	0	0	0	0	0	0	0	0	0	0	1	3
2		7	1	#NULL!	#NULL!	#NULL!	#NULL!	#NULL!		2	5	8	2	34145	3	3	3	4	4	4	5	5	5	5	5	5	5	5	5	5	2	2	6	1	0	1	1	1	1	1	0	0	0	0	0	0	0	1	3
2		7	1	#NULL!	#NULL!	#NULL!	#NULL!	#NULL!		2	2	7	2	53151	1	1	1	3	3	2	5	5	5	5	5	5	5	3	3	3	#NULL!	1	5	1	0	0	0	0	0	0	0	0	0	0	0	0	0	1	3
2		7	1	#NULL!	#NULL!	#NULL!	#NULL!	#NULL!		2	4	4	2	85351	4	4	4	4	4	4	5	5	5	5	5	5	5	1	1	1	#NULL!	3	6	1	0	0	0	0	0	0	0	0	0	0	0	0	0	1	3
2		5	1	#NULL!	#NULL!	#NULL!	#NULL!	#NULL!		2	3	8	2	08619	3	4	2	4	4	3	5	3	3	5	5	5	4	2	2	2	2	3	5	1	0	1	0	0	1	1	0	0	0	0	0	0	0	1	3
2		4	1	#NULL!	#NULL!	#NULL!	#NULL!	#NULL!		2	2	4	1	36867	0	3	1	4	3	2	4	4	3	4	3	4	4	4	4	4	#NULL!	1	6	1	1	1	1	1	1	1	0	0	0	0	0	0	0	1	3
2		7	1	#NULL!	#NULL!	#NULL!	#NULL!	#NULL!		2	3	2	2	92553	2	2	2	2	2	2	4	4	4	4	4	4	4	3	3	3	#NULL!	4	6	1	1	1	1	1	1	0	0	0	0	0	0	0	0	1	3
2		6	1	#NULL!	#NULL!	#NULL!	#NULL!	#NULL!		2	3	2	2	39532	4	4	1	4	4	1	2	3	3	5	5	5	4	4	2	2	2	1	4	1	0	0	0	0	0	0	0	0	0	0	0	0	0	1	3
2		6	1	#NULL!	#NULL!	#NULL!	#NULL!	#NULL!		2	5	5	2	01730	4	4	4	4	4	4	5	5	2	5	5	5	5	2	5	2	2	3	5	1	0	0	0	1	0	0	0	0	0	0	0	0	0	1	3
2		6	1	#NULL!	#NULL!	#NULL!	#NULL!	#NULL!		2	6	9	2	80923	3	4	2	4	3	4	1	3	1	4	5	5	1	1	1	1	2	2	4	1	1	1	0	1	1	0	0	0	0	0	1	0	0	0	3
2		4	1	#NULL!	#NULL!	#NULL!	#NULL!	#NULL!		2	3	3	1	27278	2	1	2	4	4	4	4	4	4	5	4	5	5	5	4	3	#NULL!	3	6	1	1	1	1	1	1	1	0	0	0	0	0	0	0	1	3
2		3	1	#NULL!	#NULL!	#NULL!	#NULL!	#NULL!		2	5	3	2	01062	4	4	4	4	4	4	3	3	3	5	5	5	3	3	3	3	2	3	5	1	0	0	0	0	0	0	0	0	0	0	0	0	0	1	3
2		5	1	#NULL!	#NULL!	#NULL!	#NULL!	#NULL!		2	3	2	1	29303	1	2	1	3	1	1	2	4	4	4	4	4	4	4	4	4	#NULL!	1	4	1	0	1	1	1	1	1	0	0	0	0	0	0	0	1	3
2		3	1	#NULL!	#NULL!	1	#NULL!	#NULL!		2	2	3	1	19103	0	1	0	4	0	2	5	5	5	5	5	5	5	5	5	5	#NULL!	3	3	1	1	1	1	1	1	1	0	0	0	0	0	0	0	1	3
2		6	1	#NULL!	#NULL!	#NULL!	#NULL!	#NULL!		2	2	10	2	45044	1	0	0	3	3	3	5	5	5	5	5	5	5	2	2	2	1	1	1	1	0	0	0	0	1	1	0	0	0	0	0	0	0	1	3
2		3	1	#NULL!	#NULL!	#NULL!	#NULL!	#NULL!		2	3	4	2	49770	0	0	0	3	3	2	3	4	3	3	3	4	3	2	2	2	#NULL!	1	5	1	0	0	0	0	0	0	0	0	0	0	0	0	0	1	3
2		2	1	#NULL!	#NULL!	1	#NULL!	#NULL!		2	3	6	2	42240	0	0	0	4	4	4	3	4	5	3	5	5	5	5	5	4	2	4	6	1	0	0	0	0	0	0	0	0	0	0	0	0	0	1	3
2		4	#NULL!	1	#NULL!	#NULL!	#NULL!	#NULL!		2	3	1	1	31601	1	2	1	4	2	0	1	5	1	5	5	5	5	5	5	5	#NULL!	1	6	1	1	1	1	1	1	1	0	0	0	0	0	0	0	1	3
2		7	1	#NULL!	#NULL!	#NULL!	#NULL!	#NULL!		2	3	4	2	40031	1	0	1	4	3	4	4	4	4	4	4	4	4	4	4	4	1	1	6	1	0	0	0	0	0	0	0	0	0	0	1	0	0	0	3
2		5	#NULL!	1	#NULL!	#NULL!	#NULL!	#NULL!		2	4	7	2	85741	3	3	3	4	3	3	4	4	2	4	4	4	2	1	1	1	2	3	6	1	0	0	0	0	0	0	0	0	0	0	0	0	0	1	3
2		5	1	#NULL!	#NULL!	#NULL!	#NULL!	#NULL!		2	5	6	1	87120	2	3	1	4	2	0	4	4	2	4	4	4	3	3	1	3	1	1	6	1	0	0	0	0	0	0	0	0	0	0	0	0	0	1	3
2		3	1	#NULL!	#NULL!	#NULL!	#NULL!	#NULL!		2	2	3	2	95521	3	2	0	4	2	4	4	4	4	4	5	5	3	4	3	3	1	1	5	1	0	0	0	0	0	0	0	0	0	0	0	0	0	1	3
2		7	1	#NULL!	#NULL!	#NULL!	#NULL!	#NULL!		2	5	3	2	33782	1	2	0	3	3	3	3	3	2	5	5	5	4	1	1	2	#NULL!	1	5	1	0	0	0	0	0	0	0	0	0	0	0	0	0	1	3
2		6	1	#NULL!	#NULL!	#NULL!	#NULL!	#NULL!		2	2	3	1	48239	2	4	4	4	4	4	4	2	2	4	4	4	2	2	2	2	2	2	6	0	0	0	0	0	1	0	0	1	0	1	1	0	1	0	3
2		7	1	#NULL!	#NULL!	#NULL!	#NULL!	#NULL!		2	4	5	2	23150	4	4	4	4	4	4	3	3	3	4	4	5	4	4	3	3	#NULL!	2	5	1	0	0	0	0	0	0	0	0	0	0	0	0	0	1	3
2		4	1	#NULL!	#NULL!	#NULL!	#NULL!	#NULL!		2	2	1	1	32726	4	2	3	4	4	4	5	5	5	5	5	5	5	3	1	1	2	1	6	0	0	0	0	1	1	0	0	0	0	0	1	0	0	0	3
2		6	1	#NULL!	#NULL!	#NULL!	#NULL!	#NULL!		2	1	4	1	73112	4	4	4	4	4	4	4	4	4	5	5	5	5	4	3	3	2	3	6	1	0	0	0	0	0	0	0	0	0	0	0	0	0	1	3
2		4	#NULL!	1	#NULL!	#NULL!	#NULL!	#NULL!		2	2	4	1	72104	2	3	3	2	2	3	4	4	2	3	3	3	3	4	4	5	#NULL!	2	4	1	1	1	0	0	1	1	0	0	0	0	0	0	0	1	3
2		8	1	#NULL!	#NULL!	#NULL!	#NULL!	#NULL!		2	6	2	1	55102	1	3	3	3	3	2	5	3	3	4	4	4	3	2	2	2	#NULL!	3	6	1	0	0	0	0	0	0	0	0	0	0	0	0	0	1	3
2		3	1	#NULL!	#NULL!	#NULL!	#NULL!	#NULL!		2	5	7	1	97401	2	2	2	3	3	3	4	4	4	4	4	4	4	3	3	3	#NULL!	3	6	1	0	0	0	0	0	0	0	0	0	0	1	0	0	0	3
2		3	1	#NULL!	#NULL!	#NULL!	#NULL!	#NULL!		2	6	5	2	44135	1	2	0	2	2	2	4	3	2	4	4	4	4	2	2	2	#NULL!	2	5	1	0	0	0	0	0	0	0	0	1	1	1	0	1	0	3
2		7	1	#NULL!	#NULL!	#NULL!	#NULL!	#NULL!		2	2	6	1	89104	1	2	0	4	4	3	4	4	3	5	4	4	3	2	2	2	2	3	5	1	0	0	0	0	0	0	0	0	0	0	0	0	0	1	3
2		2	1	#NULL!	#NULL!	#NULL!	#NULL!	#NULL!		2	3	8	2	77494	2	1	1	4	4	1	4	3	4	5	5	5	5	4	4	4	2	2	5	1	0	0	0	0	0	0	0	0	0	0	1	0	0	0	3
2		3	1	#NULL!	#NULL!	#NULL!	#NULL!	#NULL!		2	5	10	1	22030	0	0	0	0	0	0	5	5	5	5	5	5	5	5	5	5	2	3	5	1	1	1	1	1	1	1	0	0	0	0	0	0	0	1	3
2		4	1	#NULL!	#NULL!	#NULL!	#NULL!	#NULL!		2	2	6	1	89115	3	2	2	4	4	4	2	3	3	1	1	1	1	1	3	4	#NULL!	4	6	1	0	0	0	0	0	0	0	0	1	1	1	0	1	0	3
2		7	1	#NULL!	#NULL!	#NULL!	#NULL!	#NULL!		2	5	8	2	49685	3	3	1	4	3	3	5	4	3	5	5	4	5	4	3	3	2	1	6	1	1	1	1	1	1	1	0	0	0	0	0	0	0	1	3
2		7	1	#NULL!	#NULL!	#NULL!	#NULL!	#NULL!		2	2	3	2	14220	4	4	4	4	4	4	4	5	3	4	5	4	3	2	2	2	1	2	6	1	0	0	0	0	0	0	0	0	0	0	1	0	1	0	3
2		5	1	#NULL!	#NULL!	#NULL!	#NULL!	#NULL!		2	2	3	2	15642	0	4	3	4	4	4	5	5	5	5	5	5	5	4	3	3	#NULL!	3	5	1	0	0	0	0	0	0	0	0	0	0	0	0	0	1	3
2		7	1	#NULL!	#NULL!	#NULL!	#NULL!	#NULL!		2	2	5	2	07724	0	0	0	0	0	0	5	5	5	5	5	5	5	5	5	5	1	1	6	1	1	1	1	1	1	1	0	0	0	0	0	0	0	1	3
2		3	1	#NULL!	#NULL!	#NULL!	#NULL!	#NULL!		2	4	7	1	75235	4	4	4	4	4	4	4	4	4	5	5	5	4	4	4	4	2	3	5	1	0	0	0	0	0	0	0	0	0	0	0	0	0	1	3
2		4	1	#NULL!	#NULL!	#NULL!	#NULL!	#NULL!		2	1	3	2	60137	1	4	3	4	4	3	3	3	3	4	5	5	3	4	4	4	2	1	5	0	0	0	1	1	0	0	0	1	1	1	1	0	1	0	3
2		3	1	#NULL!	#NULL!	1	#NULL!	#NULL!		2	3	1	2	03060	1	3	3	4	4	4	4	4	4	4	5	5	5	5	5	5	2	3	5	1	1	1	1	1	1	1	0	0	0	0	0	0	0	1	3
2		5	1	#NULL!	#NULL!	#NULL!	#NULL!	#NULL!		2	5	5	1	32803	2	3	3	2	3	3	3	3	3	3	4	3	3	4	4	4	#NULL!	1	1	1	0	0	0	0	0	0	0	0	0	0	0	0	0	1	3
2		6	1	#NULL!	#NULL!	#NULL!	#NULL!	#NULL!		2	2	6	1	23518	4	4	4	4	4	4	4	5	5	5	5	5	5	5	4	3	2	3	6	1	1	1	1	1	1	1	0	0	0	0	0	0	0	1	3
2		5	1	#NULL!	#NULL!	#NULL!	#NULL!	#NULL!		2	2	5	1	54304	2	4	2	2	2	2	5	3	1	5	5	5	5	3	4	4	#NULL!	3	6	1	1	1	1	1	1	1	0	0	0	0	0	0	0	1	3
2		3	1	#NULL!	#NULL!	#NULL!	#NULL!	#NULL!		2	3	6	2	23456	4	3	2	4	4	4	3	3	3	3	5	5	3	3	3	3	#NULL!	1	5	0	0	0	1	1	1	0	0	0	0	0	1	0	1	0	3
2		2	1	#NULL!	#NULL!	#NULL!	#NULL!	#NULL!		2	3	1	1	54701	0	0	0	2	2	2	3	3	3	4	4	4	4	4	4	3	#NULL!	4	6	1	0	0	0	0	0	0	0	0	0	0	1	0	0	0	3
2		3	1	#NULL!	#NULL!	#NULL!	#NULL!	#NULL!		2	5	11	2	48331	1	3	2	4	4	3	3	3	3	4	4	4	3	1	1	1	#NULL!	2	5	1	0	0	0	1	1	0	0	1	0	1	1	0	0	0	3
2		6	1	#NULL!	#NULL!	#NULL!	#NULL!	#NULL!		2	7	12	1	82072	4	4	4	4	4	4	5	5	5	5	5	5	5	5	5	5	2	3	5	1	0	0	0	0	0	0	0	0	0	0	0	0	0	1	3
2		7	#NULL!	1	#NULL!	#NULL!	#NULL!	#NULL!		2	6	2	1	10314	1	1	0	1	1	0	3	3	3	4	4	4	3	3	3	3	#NULL!	2	5	1	0	0	0	0	0	0	0	0	0	0	0	0	0	1	3
2		5	1	#NULL!	#NULL!	#NULL!	#NULL!	#NULL!		2	3	7	2	83709	4	4	4	4	2	3	3	3	3	4	5	5	2	2	2	2	2	3	5	1	0	0	0	0	0	0	0	0	0	0	1	1	0	0	3
2		6	1	#NULL!	#NULL!	#NULL!	#NULL!	#NULL!		2	6	8	2	38016	3	4	4	4	4	4	3	3	3	4	5	5	3	4	3	3	#NULL!	1	5	1	0	0	0	0	0	0	0	0	0	0	0	0	0	1	3
2		3	#NULL!	#NULL!	#NULL!	#NULL!	#NULL!	1		2	3	5	1	17602	4	4	4	4	3	3	5	5	5	5	4	5	5	4	3	3	2	1	5	1	0	0	0	0	0	0	0	0	0	0	1	0	0	0	3
2		6	1	#NULL!	#NULL!	#NULL!	#NULL!	#NULL!		2	5	4	2	65807	4	3	4	4	4	3	4	4	4	5	5	5	4	5	5	5	2	3	6	1	0	0	0	0	0	0	0	0	0	0	0	0	0	1	3
2		2	1	#NULL!	#NULL!	#NULL!	#NULL!	#NULL!		2	6	6	2	32514	3	3	3	3	3	2	5	5	5	5	5	5	4	3	3	3	2	3	6	0	1	0	0	1	1	0	0	0	0	0	1	0	0	0	3
2		7	1	#NULL!	#NULL!	#NULL!	#NULL!	#NULL!		2	5	11	2	66210	4	4	4	4	4	4	5	5	5	5	5	5	5	4	4	4	2	3	6	1	0	0	0	0	0	0	0	0	0	0	0	0	0	1	3
2		3	1	#NULL!	#NULL!	#NULL!	#NULL!	#NULL!		2	2	7	2	48184	3	3	1	4	3	1	3	3	3	3	5	4	3	3	3	3	2	3	5	1	1	1	0	0	0	0	0	1	1	1	1	1	1	0	3
1		2	1	#NULL!	#NULL!	#NULL!	#NULL!	#NULL!		2	2	5	1	01960	3	3	3	3	4	3	3	3	5	4	3	4	4	4	3	4	2	2	2	1	0	1	0	0	0	0	0	0	0	1	0	0	1	0	3
1		3	1	#NULL!	#NULL!	#NULL!	#NULL!	#NULL!		2	5	9	1	46805	3	2	3	4	4	4	3	3	3	4	4	4	4	4	4	4	#NULL!	1	5	1	0	0	0	0	0	0	0	0	0	0	0	0	0	1	3
1		7	1	#NULL!	#NULL!	#NULL!	#NULL!	#NULL!		2	2	2	2	32960	2	2	2	2	2	2	4	4	4	4	4	4	4	3	3	3	2	3	6	1	0	0	0	0	0	0	0	0	0	0	0	0	0	1	3
1		8	1	#NULL!	#NULL!	#NULL!	#NULL!	#NULL!		2	5	6	1	06811	4	4	4	4	4	4	4	2	2	4	5	5	4	2	2	2	#NULL!	1	6	1	0	0	0	0	0	0	0	0	0	0	0	0	0	1	3
1		7	1	#NULL!	#NULL!	#NULL!	#NULL!	#NULL!		2	5	6	2	33024	3	4	4	4	3	3	1	1	1	1	5	5	1	1	1	1	#NULL!	3	6	1	0	0	0	0	0	0	0	1	1	1	1	1	1	0	3
1		8	1	#NULL!	#NULL!	#NULL!	#NULL!	#NULL!		2	5	7	2	10954	3	3	2	3	3	3	5	5	5	4	5	4	3	3	2	2	1	1	5	1	0	0	0	0	0	0	0	0	0	0	0	0	0	1	3
1		7	1	#NULL!	#NULL!	#NULL!	#NULL!	#NULL!		2	5	9	2	03054	2	3	3	3	3	3	4	4	3	5	5	5	3	5	5	4	#NULL!	1	1	1	0	0	0	0	0	0	0	1	0	0	0	1	0	0	3
1		7	1	#NULL!	#NULL!	#NULL!	#NULL!	#NULL!		2	5	6	2	06477	3	3	3	4	3	2	5	5	3	5	5	5	3	3	2	2	2	3	5	1	0	0	0	0	0	0	0	0	0	0	0	0	0	1	3
1		7	1	#NULL!	#NULL!	#NULL!	#NULL!	#NULL!		2	2	3	2	40291	3	4	4	4	3	3	5	5	3	4	5	5	4	4	3	3	#NULL!	3	4	1	0	0	0	0	0	0	0	0	0	0	0	0	0	1	3
1		7	1	#NULL!	#NULL!	#NULL!	#NULL!	#NULL!		2	5	9	2	92706	3	4	3	4	4	2	3	3	3	4	5	5	3	3	3	2	2	3	5	1	1	1	1	1	1	1	0	0	0	0	0	0	0	1	3
1		2	1	#NULL!	#NULL!	#NULL!	#NULL!	#NULL!		2	1	1	1	05345	2	3	4	3	4	0	2	1	2	5	4	2	2	5	4	4	2	2	2	1	0	0	0	0	0	0	0	0	0	0	0	0	0	1	3
1		2	1	#NULL!	#NULL!	#NULL!	#NULL!	#NULL!		1	4	7	1	60629	3	0	0	3	0	3	4	5	5	5	5	5	5	4	3	3	2	3	5	0	1	1	0	0	0	0	0	0	0	0	0	0	0	1	3
1		4	#NULL!	1	#NULL!	#NULL!	#NULL!	#NULL!		2	3	4	1	30337	3	2	2	2	2	2	3	3	3	3	3	3	3	3	3	3	#NULL!	1	6	1	0	0	0	0	0	0	0	0	0	0	0	0	0	1	3
1		2	1	#NULL!	#NULL!	#NULL!	#NULL!	#NULL!		1	3	10	2	79904	3	3	2	3	3	4	4	4	4	5	5	5	4	4	3	3	#NULL!	2	6	1	0	0	0	0	0	0	0	0	0	0	0	0	0	1	3
1		7	1	#NULL!	#NULL!	#NULL!	#NULL!	#NULL!		2	3	10	2	33761	3	4	2	4	2	3	3	3	3	4	4	4	3	2	2	2	2	3	6	0	1	0	0	0	0	0	0	0	0	0	0	0	0	1	3
1		6	1	#NULL!	#NULL!	#NULL!	#NULL!	#NULL!		2	5	4	2	21015	3	4	2	4	3	3	4	4	1	5	5	5	2	1	1	1	2	3	5	0	1	0	0	0	0	0	0	0	0	0	0	0	0	1	3
1		8	1	#NULL!	#NULL!	#NULL!	#NULL!	#NULL!		2	5	5	2	97223	2	2	2	3	3	3	4	4	4	4	4	4	4	3	4	4	#NULL!	1	5	1	0	0	0	0	0	0	0	0	0	0	0	0	0	1	3
1		8	1	#NULL!	#NULL!	#NULL!	#NULL!	#NULL!		2	5	8	1	66609	4	4	4	4	4	4	5	5	3	5	5	5	4	3	3	3	#NULL!	2	5	1	0	0	0	0	0	0	0	0	0	0	0	0	0	1	3
1		6	#NULL!	#NULL!	#NULL!	#NULL!	1	#NULL!		2	5	8	1	95828	2	2	2	4	4	2	2	3	3	1	1	1	1	4	4	5	#NULL!	2	6	1	0	0	0	0	0	0	0	0	0	0	0	0	0	1	3
1		7	1	#NULL!	#NULL!	#NULL!	#NULL!	#NULL!		2	5	6	2	80831	2	3	3	3	3	3	4	4	3	4	4	4	3	4	3	2	2	3	5	1	0	0	1	1	0	0	0	1	0	0	1	0	0	0	3
1		3	1	#NULL!	#NULL!	#NULL!	#NULL!	#NULL!		2	5	10	1	94133	4	4	4	3	3	3	5	5	5	5	5	5	1	5	5	3	2	2	6	1	0	0	0	0	0	0	0	0	0	0	0	0	0	1	3
1		5	1	#NULL!	#NULL!	#NULL!	#NULL!	#NULL!		2	5	5	2	30741	4	4	4	4	4	4	5	5	5	5	5	5	5	5	5	5	#NULL!	1	6	1	0	0	0	0	0	0	0	0	0	0	0	0	0	1	3
1		6	#NULL!	1	#NULL!	#NULL!	#NULL!	#NULL!		2	4	6	1	85007	3	4	4	4	4	4	5	5	5	5	5	5	5	5	5	5	1	1	6	1	0	0	0	0	0	0	0	0	0	0	0	0	0	1	3
1		7	1	#NULL!	#NULL!	#NULL!	#NULL!	#NULL!		2	6	6	2	01923	3	3	3	3	3	3	4	3	3	4	4	4	3	4	3	3	2	1	5	1	0	0	0	0	0	0	0	0	0	0	0	0	0	1	3
1		8	1	#NULL!	#NULL!	#NULL!	#NULL!	#NULL!		2	5	11	2	28546	4	4	4	4	4	4	4	4	3	5	4	5	3	3	1	1	#NULL!	2	5	0	1	0	0	0	0	0	0	0	0	0	1	0	0	0	3
1		4	1	#NULL!	#NULL!	#NULL!	#NULL!	#NULL!		2	3	3	1	98104	4	4	4	4	4	4	5	5	5	5	5	5	3	2	2	3	#NULL!	4	5	1	0	0	0	0	0	0	0	0	0	0	0	0	0	1	3
1		4	1	#NULL!	#NULL!	#NULL!	#NULL!	#NULL!		2	4	3	1	42301	4	4	4	4	4	4	5	5	3	5	5	5	5	5	5	3	#NULL!	4	6	1	0	0	0	0	0	0	0	0	0	0	0	0	0	1	3
1		8	1	#NULL!	#NULL!	#NULL!	#NULL!	#NULL!		2	2	2	2	18519	0	1	0	4	4	4	5	5	4	5	5	5	5	4	4	4	2	1	5	1	0	1	1	1	1	0	0	0	0	0	0	0	0	1	3
1		8	1	#NULL!	#NULL!	#NULL!	#NULL!	#NULL!		2	6	7	2	97034	3	3	3	4	4	3	4	3	3	4	5	5	4	1	1	1	2	1	5	1	0	0	0	0	0	0	0	0	0	0	0	0	0	1	3
1		7	1	#NULL!	#NULL!	#NULL!	#NULL!	#NULL!		2	5	6	2	37771	1	2	1	3	2	1	5	5	5	5	5	5	5	3	3	3	#NULL!	1	4	1	0	0	0	0	0	0	0	1	0	1	0	1	0	0	3
1		7	1	#NULL!	#NULL!	#NULL!	#NULL!	#NULL!		2	4	6	2	82545	4	4	2	4	4	4	5	5	5	5	5	5	5	3	1	1	#NULL!	3	5	1	0	0	0	0	0	0	0	0	0	0	0	0	0	1	3
1		8	1	#NULL!	#NULL!	#NULL!	#NULL!	#NULL!		2	2	5	2	33801	1	2	2	3	3	2	4	4	4	4	4	4	4	4	3	4	#NULL!	1	4	1	0	0	0	0	0	0	0	1	1	1	0	0	0	0	3
1		8	1	#NULL!	#NULL!	#NULL!	#NULL!	#NULL!		2	4	8	2	34233	3	4	4	4	4	4	5	5	4	5	5	5	4	4	4	4	#NULL!	2	1	1	0	0	0	0	1	0	0	0	0	0	0	0	0	1	3
1		4	#NULL!	#NULL!	#NULL!	1	#NULL!	#NULL!		2	3	5	1	19149	4	4	4	4	4	4	1	5	3	1	1	1	1	5	5	5	2	1	6	1	1	1	1	1	1	1	0	0	0	0	0	0	0	1	3
1		7	1	#NULL!	#NULL!	#NULL!	#NULL!	#NULL!		2	5	11	2	01033	4	4	3	4	3	4	3	4	2	5	5	5	3	2	2	2	2	3	6	1	0	0	0	0	0	0	0	0	0	0	0	0	0	1	3
1		8	1	#NULL!	#NULL!	#NULL!	#NULL!	#NULL!		2	6	7	2	32812	4	4	4	4	4	4	5	5	5	5	5	5	5	5	5	5	2	3	6	1	1	1	1	1	1	1	0	0	0	0	0	0	0	1	3
1		4	1	#NULL!	#NULL!	#NULL!	#NULL!	#NULL!		2	3	3	2	89433	3	4	2	4	4	4	5	5	5	5	5	5	3	4	4	3	2	3	6	0	0	0	0	1	1	0	0	0	0	0	1	0	0	0	3
1		9	1	#NULL!	#NULL!	#NULL!	#NULL!	#NULL!		2	5	12	2	91356	3	3	3	4	4	3	3	4	3	5	5	5	5	4	3	3	#NULL!	2	5	1	0	0	0	0	0	0	0	0	0	0	0	0	0	1	3
1		8	1	#NULL!	#NULL!	#NULL!	#NULL!	#NULL!		2	3	6	2	77433	2	3	3	4	4	4	4	4	4	5	5	5	5	2	3	3	#NULL!	1	6	1	0	0	0	0	0	0	0	0	0	0	0	0	0	1	3
1		7	1	#NULL!	#NULL!	#NULL!	#NULL!	#NULL!		2	2	4	2	48044	0	0	0	0	0	0	4	3	3	5	5	5	5	3	3	3	#NULL!	1	6	1	0	0	0	0	0	0	0	0	0	0	0	0	0	1	3
1		4	1	#NULL!	#NULL!	#NULL!	#NULL!	#NULL!		2	4	6	2	53110	3	3	3	3	3	3	4	5	1	5	1	5	1	2	2	3	#NULL!	1	2	1	0	0	0	0	0	0	0	1	0	0	0	0	0	0	3
1		6	1	#NULL!	#NULL!	#NULL!	#NULL!	#NULL!		2	3	7	2	37924	3	3	2	4	3	3	4	4	4	4	4	4	4	4	4	4	#NULL!	4	2	1	0	0	0	0	0	0	0	0	0	0	0	0	0	1	3
1		6	1	#NULL!	#NULL!	#NULL!	#NULL!	#NULL!		2	2	3	2	05661	0	1	1	3	0	0	5	5	2	5	5	5	2	3	3	3	#NULL!	2	2	1	0	0	0	0	0	0	0	0	0	0	0	0	0	1	3
1		9	1	#NULL!	#NULL!	#NULL!	#NULL!	#NULL!		2	6	11	2	07627	4	4	4	2	4	4	5	5	5	4	5	4	3	5	4	4	#NULL!	2	5	1	0	0	0	0	0	0	0	0	0	0	0	1	0	0	3
1		8	1	#NULL!	#NULL!	#NULL!	#NULL!	#NULL!		2	6	10	2	30529	0	3	1	3	2	2	5	5	3	5	5	5	3	4	3	4	2	3	5	1	1	1	0	0	1	0	0	0	0	0	0	0	0	1	3
1		7	1	#NULL!	#NULL!	#NULL!	#NULL!	#NULL!		2	5	6	2	11756	1	3	1	2	2	2	4	4	4	4	4	4	4	3	3	3	#NULL!	1	6	1	0	0	0	0	0	0	0	0	0	0	0	0	0	1	3
1		7	1	#NULL!	#NULL!	#NULL!	#NULL!	#NULL!		2	3	6	2	32258	4	4	4	4	4	3	1	4	1	5	5	5	3	5	3	5	2	1	5	1	0	0	0	0	0	0	0	0	0	0	0	0	0	1	3
1		7	1	#NULL!	#NULL!	#NULL!	#NULL!	#NULL!		2	6	5	2	48237	2	2	2	2	2	2	4	4	4	4	4	4	4	1	1	1	#NULL!	2	6	1	0	0	0	0	0	0	0	0	0	0	0	0	0	1	3
1		7	1	#NULL!	#NULL!	#NULL!	#NULL!	#NULL!		2	2	11	2	08205	3	3	2	4	4	3	4	4	4	5	5	5	5	4	4	4	2	2	3	1	0	0	0	0	0	0	0	0	0	0	1	1	0	0	3
1		7	#NULL!	#NULL!	#NULL!	1	#NULL!	#NULL!		2	3	11	2	38016	2	2	2	4	4	4	5	4	4	5	5	5	5	3	3	3	#NULL!	3	2	1	0	0	0	0	0	0	0	0	0	0	1	0	0	0	3
1		7	1	#NULL!	#NULL!	#NULL!	#NULL!	#NULL!		2	5	2	1	14607	2	2	1	3	3	2	5	5	4	5	4	4	3	3	2	5	#NULL!	1	5	1	0	0	0	1	1	0	0	0	0	0	0	0	0	1	3
1		8	1	#NULL!	#NULL!	#NULL!	#NULL!	#NULL!		2	6	11	1	92656	4	4	4	4	4	4	5	5	5	5	5	5	5	5	5	5	#NULL!	1	5	1	0	0	0	0	0	0	0	0	0	0	0	0	0	1	3
1		8	1	#NULL!	#NULL!	#NULL!	#NULL!	#NULL!		2	6	9	1	94607	3	3	3	3	2	3	3	3	3	5	5	5	2	3	3	3	#NULL!	3	5	1	0	0	0	0	0	0	0	0	0	0	0	0	0	1	3
1		7	1	#NULL!	#NULL!	#NULL!	#NULL!	#NULL!		2	4	4	2	85022	4	4	4	4	4	4	3	3	3	3	3	4	3	4	4	4	#NULL!	4	6	1	0	0	0	0	0	0	0	0	0	0	0	0	0	1	3
1		5	1	#NULL!	#NULL!	#NULL!	#NULL!	#NULL!		2	3	3	2	95348	2	3	3	3	2	2	4	4	4	5	5	5	2	3	3	2	2	3	5	0	1	0	1	1	1	0	0	0	0	0	0	0	0	1	3
1		7	1	#NULL!	#NULL!	#NULL!	#NULL!	#NULL!		2	2	9	2	02777	3	3	3	3	3	3	4	4	4	5	5	5	5	4	4	4	#NULL!	1	5	1	0	0	0	0	0	0	0	0	0	0	0	0	0	1	3
1		7	1	#NULL!	#NULL!	#NULL!	#NULL!	#NULL!		2	5	6	1	76542	2	4	4	4	4	4	2	2	2	4	5	4	3	1	1	1	2	3	6	1	0	0	0	0	0	0	0	0	0	0	0	0	0	1	3
1		7	#NULL!	#NULL!	1	#NULL!	#NULL!	#NULL!		2	5	4	1	78240	3	3	3	4	2	4	5	5	5	4	5	5	4	3	3	3	#NULL!	2	3	1	0	0	0	0	0	0	0	0	0	0	0	0	0	1	3
1		7	1	#NULL!	#NULL!	#NULL!	#NULL!	#NULL!		2	5	9	2	88005	4	4	4	4	4	4	2	4	1	5	5	5	1	1	1	1	2	1	5	1	0	0	0	0	0	0	0	0	0	0	1	0	1	0	3
1		6	1	#NULL!	#NULL!	#NULL!	#NULL!	#NULL!		2	6	12	2	22042	3	3	3	3	3	2	4	4	3	5	5	5	4	3	3	3	1	2	1	1	0	0	0	0	0	0	0	0	0	0	0	0	0	1	3
1		7	1	#NULL!	#NULL!	#NULL!	#NULL!	#NULL!		2	4	3	2	55124	4	4	3	4	3	4	4	3	3	5	5	5	3	3	4	2	2	3	5	1	1	0	0	1	0	0	0	0	0	0	1	0	0	0	3
1		7	1	#NULL!	#NULL!	#NULL!	#NULL!	#NULL!		2	5	8	2	95821	3	2	2	4	4	4	4	4	3	3	4	4	3	4	3	2	2	3	5	0	1	1	0	1	1	0	0	1	0	0	0	0	0	0	3
1		8	1	#NULL!	#NULL!	#NULL!	#NULL!	#NULL!		2	5	4	2	43613	2	4	4	4	4	4	4	4	3	3	5	4	3	3	3	3	2	1	6	1	0	0	0	0	0	0	0	0	0	0	0	0	0	1	3
1		7	#NULL!	1	#NULL!	#NULL!	#NULL!	#NULL!		2	3	5	2	76179	4	4	4	4	4	4	4	4	4	5	5	4	3	2	2	2	#NULL!	2	5	1	0	0	0	0	0	0	0	0	0	0	0	0	0	1	3
1		7	1	#NULL!	#NULL!	#NULL!	#NULL!	#NULL!		2	5	5	1	32803	3	3	3	4	4	3	4	4	4	5	5	5	5	4	4	4	2	3	5	1	0	0	0	0	0	0	0	0	0	0	0	0	0	1	3
1		8	1	#NULL!	#NULL!	#NULL!	#NULL!	#NULL!		2	6	7	1	46256	3	3	3	3	3	3	5	3	2	5	5	5	4	2	2	2	1	1	6	1	1	0	1	1	0	0	0	0	0	0	1	0	0	0	3
1		6	1	#NULL!	#NULL!	#NULL!	#NULL!	#NULL!		2	5	3	2	01851	4	4	1	4	4	3	5	4	3	5	5	5	3	4	1	2	2	3	5	1	0	0	0	0	0	0	0	0	0	0	0	0	0	1	3
1		7	1	#NULL!	#NULL!	#NULL!	#NULL!	#NULL!		2	3	10	2	14227	4	4	3	4	4	4	4	4	4	5	5	5	4	4	4	3	#NULL!	1	5	1	0	1	1	1	1	0	0	0	0	0	0	0	0	1	3
1		4	#NULL!	1	#NULL!	#NULL!	#NULL!	#NULL!		2	3	4	1	21215	3	3	3	3	3	3	3	4	3	2	1	1	3	5	3	5	#NULL!	2	4	1	1	1	0	0	0	0	0	0	0	0	0	0	0	1	3
1		7	1	#NULL!	#NULL!	#NULL!	#NULL!	#NULL!		2	5	12	2	89148	3	4	1	3	2	1	5	5	5	5	5	5	5	4	3	4	2	3	5	1	0	0	0	0	0	0	0	0	0	0	1	0	0	0	3
1		7	#NULL!	1	#NULL!	#NULL!	#NULL!	#NULL!		2	5	9	2	20112	2	3	1	4	2	0	3	3	3	5	5	5	5	3	2	2	#NULL!	1	5	1	0	0	0	0	0	0	0	0	0	0	0	0	0	1	3
1		7	1	#NULL!	#NULL!	#NULL!	#NULL!	#NULL!		2	5	11	2	34203	4	4	4	4	4	3	3	2	2	3	5	4	3	3	2	3	2	3	5	1	0	0	0	0	1	0	0	0	0	0	1	0	0	0	3
1		7	1	#NULL!	#NULL!	#NULL!	#NULL!	#NULL!		1	6	4	2	78240	2	2	1	3	3	2	3	3	3	4	4	4	2	3	1	1	#NULL!	1	5	0	1	0	0	0	0	0	0	0	0	0	1	0	0	0	3
1		8	1	#NULL!	#NULL!	#NULL!	#NULL!	#NULL!		2	3	5	2	55428	4	4	3	4	3	2	5	5	5	5	5	5	4	5	5	4	2	3	6	0	1	1	1	1	1	0	0	0	0	0	0	0	0	1	3
1		7	1	1	#NULL!	1	#NULL!	1	hispanic	1	3	12	2	95014	3	4	4	4	4	4	5	5	3	5	5	4	3	2	2	1	#NULL!	1	5	0	1	0	0	1	1	0	0	0	0	0	0	0	0	1	3
1		7	1	#NULL!	#NULL!	#NULL!	#NULL!	#NULL!		2	2	4	1	60706	4	4	4	4	4	4	5	5	3	5	5	5	3	4	3	3	2	3	5	1	1	1	0	0	0	0	0	0	0	0	0	0	0	1	3
1		7	1	#NULL!	#NULL!	#NULL!	#NULL!	#NULL!		2	3	8	1	32607	2	3	3	3	3	3	4	4	2	4	4	4	2	2	3	3	1	3	5	1	0	0	0	0	0	0	0	0	0	0	0	0	0	1	3
1		6	1	#NULL!	#NULL!	#NULL!	#NULL!	#NULL!		2	5	11	2	18707	3	3	4	4	3	3	4	4	3	4	4	4	3	3	3	3	#NULL!	4	6	1	1	1	1	1	1	1	0	0	0	0	0	0	0	1	3
1		6	1	#NULL!	#NULL!	#NULL!	#NULL!	#NULL!		1	3	6	1	11221	2	2	2	4	2	0	3	3	3	3	3	3	3	3	3	3	1	1	6	1	0	0	0	0	0	0	0	0	0	0	0	0	0	1	3
1		8	1	#NULL!	#NULL!	#NULL!	#NULL!	#NULL!		1	2	4	1	33126	2	2	2	3	3	2	4	4	3	4	4	4	4	3	3	3	2	1	5	1	0	0	0	0	0	0	0	0	0	0	0	0	0	1	3
1		7	#NULL!	#NULL!	#NULL!	#NULL!	#NULL!	1		2	6	9	2	48312	0	3	0	4	4	4	2	1	1	4	5	5	1	1	1	1	2	3	5	1	1	1	0	0	0	0	0	0	0	0	1	0	0	0	3
1		7	1	#NULL!	#NULL!	#NULL!	#NULL!	#NULL!		2	2	3	2	83835	3	2	0	1	1	0	1	1	1	1	4	3	1	1	1	1	1	2	5	1	0	0	0	0	0	0	0	1	0	0	0	0	0	0	3
1		6	1	#NULL!	#NULL!	#NULL!	#NULL!	#NULL!		2	3	12	2	23236	2	3	2	3	3	2	4	4	3	4	4	4	4	4	3	3	2	3	5	1	0	0	0	0	0	0	0	0	0	0	0	0	0	1	3
1		8	1	#NULL!	#NULL!	#NULL!	#NULL!	#NULL!		2	3	3	2	32901	2	3	2	3	3	3	4	5	4	5	5	5	4	4	2	3	2	3	6	1	0	0	0	0	0	0	0	0	0	0	1	0	1	0	3
1		7	1	#NULL!	#NULL!	#NULL!	#NULL!	#NULL!		2	5	2	2	28601	3	4	3	4	4	3	4	4	3	5	5	5	4	3	2	2	#NULL!	1	5	1	0	0	0	0	0	0	0	0	0	0	0	0	0	1	3
1		7	1	#NULL!	#NULL!	#NULL!	#NULL!	#NULL!		2	6	12	2	80122	3	3	3	4	4	4	3	1	1	4	4	4	2	2	2	1	2	1	5	0	0	1	0	1	1	0	0	0	0	0	1	0	0	0	3
1		8	1	#NULL!	#NULL!	#NULL!	#NULL!	#NULL!		2	6	10	2	45239	2	2	1	3	2	2	3	3	3	4	4	4	3	2	2	2	1	2	5	0	0	1	0	0	0	0	0	1	0	0	0	0	0	0	3
1		6	1	#NULL!	#NULL!	#NULL!	#NULL!	#NULL!		2	3	10	1	14222	3	2	0	4	2	2	5	5	4	5	5	5	4	1	1	1	#NULL!	5	5	1	0	0	0	0	0	0	0	0	0	0	0	0	0	1	3
1		3	1	#NULL!	#NULL!	#NULL!	#NULL!	#NULL!		2	2	12	2	37777	3	3	3	3	3	3	4	4	2	3	3	4	4	4	3	2	#NULL!	1	5	1	0	0	1	1	1	1	0	0	0	0	0	0	0	1	3
1		8	1	#NULL!	#NULL!	#NULL!	#NULL!	#NULL!		2	4	8	2	97086	4	4	4	4	4	4	5	5	5	5	5	5	5	1	1	1	2	3	2	1	0	0	0	0	0	0	0	0	0	0	1	0	0	0	3
1		7	1	#NULL!	#NULL!	#NULL!	#NULL!	#NULL!		2	5	5	2	48170	1	2	2	1	1	1	3	3	3	5	5	5	4	4	3	3	#NULL!	3	6	1	0	0	0	0	0	0	0	0	0	0	0	0	0	1	3
1		7	1	#NULL!	#NULL!	#NULL!	#NULL!	#NULL!		2	6	11	2	10917	3	4	3	4	4	4	3	3	3	5	5	5	3	2	2	2	2	3	5	0	1	0	1	0	1	0	0	0	0	0	0	0	0	1	3
1		7	1	#NULL!	#NULL!	#NULL!	#NULL!	#NULL!		2	3	4	2	28374	0	2	1	3	1	1	4	4	3	5	4	4	3	4	3	3	#NULL!	1	5	1	0	0	0	0	0	0	0	0	0	0	0	0	0	1	3
1		4	#NULL!	#NULL!	#NULL!	1	#NULL!	#NULL!		2	1	5	1	60645	1	1	0	0	0	0	5	5	1	5	5	5	5	5	5	5	#NULL!	1	6	1	0	0	0	0	0	0	0	0	0	0	0	0	0	1	3
1		7	1	#NULL!	#NULL!	#NULL!	#NULL!	#NULL!		2	6	12	2	32259	1	4	4	4	1	3	5	5	3	5	5	5	5	1	1	1	2	3	5	1	0	0	0	1	1	1	0	0	0	0	0	0	0	1	3
1		6	1	#NULL!	#NULL!	#NULL!	#NULL!	#NULL!		2	2	4	2	45177	4	4	0	4	0	0	4	2	2	5	5	5	3	1	3	3	#NULL!	1	5	1	0	0	0	0	0	0	0	0	0	0	1	0	0	0	3
1		8	1	#NULL!	#NULL!	#NULL!	#NULL!	#NULL!		2	5	11	2	78640	3	4	0	4	2	1	5	3	3	5	4	5	4	3	3	3	2	4	5	1	0	0	0	0	0	0	0	0	0	0	0	0	0	1	3
1		7	1	#NULL!	#NULL!	#NULL!	#NULL!	#NULL!		2	4	3	2	45356	4	4	4	4	4	4	3	3	3	4	5	5	5	3	3	3	#NULL!	3	6	1	0	0	0	0	0	0	0	0	0	0	0	0	0	1	3
1		7	1	#NULL!	#NULL!	#NULL!	#NULL!	#NULL!		2	3	5	2	32547	0	0	0	0	0	0	3	3	3	3	3	3	3	3	3	3	#NULL!	1	6	1	0	0	0	0	0	0	0	0	0	0	0	0	0	1	3
1		6	1	#NULL!	#NULL!	#NULL!	#NULL!	#NULL!		2	5	4	2	85743	4	4	4	4	4	4	4	4	2	5	5	5	5	5	5	5	#NULL!	1	1	1	0	0	0	0	0	0	0	0	0	0	0	0	0	1	3
1		7	1	#NULL!	#NULL!	#NULL!	#NULL!	#NULL!		2	2	6	2	32407	3	3	3	3	3	3	4	4	3	3	4	4	2	1	1	1	2	1	5	1	0	0	0	0	0	0	0	0	0	0	0	0	0	1	3
1		7	1	#NULL!	#NULL!	#NULL!	#NULL!	#NULL!		2	5	12	2	73170	3	3	3	3	3	3	3	3	3	4	4	4	3	3	3	3	2	3	5	0	1	0	0	0	0	0	0	0	0	0	0	0	0	1	3
1		7	1	#NULL!	#NULL!	#NULL!	#NULL!	#NULL!		2	2	7	2	19352	2	4	3	4	4	4	3	3	3	4	5	5	4	3	3	3	#NULL!	1	6	1	0	0	0	0	0	0	0	0	0	0	0	0	0	1	3
1		8	1	#NULL!	#NULL!	#NULL!	#NULL!	#NULL!		2	4	2	2	12020	4	4	4	4	4	2	5	5	5	5	5	5	5	3	3	5	#NULL!	1	6	1	0	0	0	0	0	0	0	0	0	0	0	0	0	1	3
1		7	1	#NULL!	#NULL!	#NULL!	#NULL!	#NULL!		2	5	3	2	32086	3	3	3	4	3	3	4	4	4	4	5	5	5	4	4	4	#NULL!	3	6	1	0	0	0	0	0	0	0	0	0	0	0	0	0	1	3
1		6	1	#NULL!	#NULL!	#NULL!	#NULL!	#NULL!		2	5	8	1	78254	2	2	2	3	3	2	4	4	3	4	4	4	3	4	3	3	2	3	6	1	1	1	0	1	1	0	0	0	0	0	1	0	0	0	3
1		6	#NULL!	1	#NULL!	#NULL!	#NULL!	#NULL!		2	5	5	1	11233	0	0	0	4	4	3	1	1	1	1	1	1	1	1	1	1	1	1	5	1	0	0	0	0	1	0	0	0	0	0	0	0	0	1	3
1		8	1	#NULL!	#NULL!	#NULL!	#NULL!	#NULL!		2	3	3	1	92376	3	3	0	3	2	2	1	2	3	5	5	5	4	2	3	3	#NULL!	1	1	1	0	0	0	0	0	0	0	0	0	0	0	0	0	1	3
1		6	1	#NULL!	#NULL!	#NULL!	#NULL!	#NULL!		2	6	11	1	80247	3	3	3	4	3	3	2	2	2	4	4	5	4	2	2	2	2	3	5	1	0	0	0	0	0	0	0	0	0	0	1	0	0	0	3
1		5	1	#NULL!	#NULL!	#NULL!	#NULL!	#NULL!		2	6	11	2	16415	4	4	4	4	4	4	5	5	5	5	5	5	5	5	5	5	2	3	5	1	1	1	0	1	1	0	0	0	0	0	0	0	0	1	3
1		7	1	#NULL!	#NULL!	#NULL!	#NULL!	#NULL!		2	4	7	2	97229	3	3	2	3	3	2	3	3	3	4	4	4	3	2	1	1	2	3	3	0	0	0	1	0	1	0	0	0	0	0	0	0	0	1	3
1		7	1	#NULL!	#NULL!	#NULL!	#NULL!	#NULL!		2	3	3	2	22026	1	2	1	2	1	0	4	4	3	4	5	5	4	4	4	3	2	1	6	1	1	1	0	0	0	0	0	0	0	0	0	0	0	1	3
1		8	1	#NULL!	#NULL!	#NULL!	#NULL!	#NULL!		2	2	5	2	34655	3	4	2	3	1	0	5	5	3	4	3	4	3	3	3	3	#NULL!	1	5	1	0	0	0	0	0	0	0	0	0	0	0	0	0	1	3
1		6	1	#NULL!	#NULL!	#NULL!	#NULL!	#NULL!		2	6	9	2	33763	4	4	4	4	4	3	5	5	5	5	5	5	1	5	5	5	2	3	6	1	1	1	0	1	1	1	0	1	0	0	0	0	0	0	3
1		8	1	#NULL!	#NULL!	#NULL!	#NULL!	#NULL!		2	6	3	2	76112	0	0	0	1	0	0	5	5	5	5	5	5	5	4	4	4	2	3	6	1	0	0	0	0	0	0	0	0	0	0	0	0	0	1	3
1		7	1	#NULL!	#NULL!	#NULL!	#NULL!	#NULL!		2	4	6	2	21502	4	4	4	4	3	3	1	5	5	5	5	5	2	1	1	1	2	4	5	1	0	0	0	0	0	0	0	0	0	1	0	0	0	0	3
1		7	1	#NULL!	#NULL!	#NULL!	#NULL!	#NULL!		2	5	7	2	07073	3	3	3	3	3	3	4	4	2	4	4	4	4	2	2	2	2	4	3	1	0	0	0	1	0	0	0	1	1	1	1	1	1	0	3
1		8	1	#NULL!	#NULL!	#NULL!	#NULL!	#NULL!		2	2	3	1	98682	4	2	0	1	1	1	5	5	5	5	5	5	5	5	3	2	1	1	6	1	0	0	0	0	0	0	0	0	0	0	0	0	0	1	3
1		7	1	#NULL!	#NULL!	#NULL!	#NULL!	#NULL!		2	2	3	2	72118	3	3	2	4	4	1	1	3	3	5	3	5	4	4	5	5	#NULL!	1	6	1	0	0	0	0	0	0	0	0	0	0	0	0	0	1	3
1		7	1	#NULL!	#NULL!	#NULL!	#NULL!	#NULL!		2	2	6	2	44057	2	4	4	4	4	4	5	5	4	5	5	5	4	4	3	3	#NULL!	3	6	1	0	1	1	1	1	0	0	0	0	0	0	0	0	1	3
1		6	1	#NULL!	#NULL!	#NULL!	#NULL!	#NULL!		2	3	1	2	31907	2	4	4	4	4	4	5	5	5	5	5	5	5	1	1	3	2	3	5	1	0	0	0	0	0	0	0	1	0	0	1	0	0	0	3
1		8	1	#NULL!	#NULL!	#NULL!	#NULL!	#NULL!		2	3	7	2	641189	4	4	4	4	4	4	5	5	5	5	5	5	5	3	3	3	#NULL!	5	5	1	0	0	0	0	0	0	0	1	0	0	0	0	0	0	3
1		6	1	#NULL!	#NULL!	#NULL!	#NULL!	#NULL!		2	5	11	1	10065	3	3	3	4	4	4	4	4	4	4	4	4	4	4	4	4	#NULL!	1	5	1	0	0	0	0	0	0	0	0	0	0	0	0	0	1	3
1		7	1	#NULL!	#NULL!	#NULL!	#NULL!	#NULL!		2	3	3	2	32086	3	4	4	4	4	4	2	2	2	5	5	5	3	2	2	3	#NULL!	1	6	1	0	0	0	0	0	0	0	0	0	0	0	0	0	1	3
1		6	1	#NULL!	#NULL!	#NULL!	#NULL!	#NULL!		2	5	12	2	07432	1	1	1	3	3	1	3	3	3	4	5	5	3	3	3	3	#NULL!	2	5	1	0	0	0	0	0	0	0	0	0	0	0	0	0	1	3
1		5	1	#NULL!	#NULL!	#NULL!	#NULL!	#NULL!		2	4	5	2	19030	3	3	3	3	3	3	4	4	4	4	4	4	4	4	4	4	2	3	4	0	0	1	0	0	0	0	0	0	0	0	0	0	0	1	3
1		7	1	#NULL!	#NULL!	#NULL!	#NULL!	#NULL!		2	6	6	1	27106	0	0	0	0	0	0	5	5	5	5	5	5	5	5	5	5	2	3	5	1	0	0	0	0	0	0	0	0	0	0	0	0	0	1	3
1		6	1	#NULL!	#NULL!	#NULL!	#NULL!	#NULL!		2	3	6	2	61614	2	3	2	3	2	2	4	4	3	5	5	5	3	4	3	3	#NULL!	1	5	1	0	0	0	0	0	0	0	0	0	0	1	0	0	0	3
1		7	1	#NULL!	#NULL!	#NULL!	#NULL!	#NULL!		2	6	5	1	87123	3	3	3	4	3	3	5	5	5	5	5	5	5	3	3	4	1	1	1	1	0	0	0	0	0	0	0	0	0	0	0	0	0	1	3
1		8	1	#NULL!	#NULL!	#NULL!	#NULL!	#NULL!		2	3	3	1	64804	4	0	4	4	4	4	4	4	3	4	4	4	3	2	2	2	#NULL!	1	6	1	0	0	0	0	0	0	0	0	0	0	0	0	0	1	3
1		7	1	#NULL!	#NULL!	#NULL!	#NULL!	#NULL!		2	4	3	1	37214	3	4	4	4	4	4	4	4	3	5	5	5	3	3	2	1	1	1	6	1	0	0	0	0	0	0	0	0	0	0	1	0	1	0	3
1		7	1	#NULL!	#NULL!	#NULL!	#NULL!	#NULL!		2	3	7	2	49417	4	4	4	4	4	4	5	5	3	5	5	5	3	3	3	3	2	2	6	1	0	0	0	0	0	0	0	0	0	0	0	0	0	1	3
1		7	1	#NULL!	#NULL!	#NULL!	#NULL!	#NULL!		2	6	11	2	16148	4	4	4	4	4	0	1	1	1	5	5	5	1	1	1	1	2	3	5	1	0	0	1	1	1	0	0	0	0	0	1	0	0	0	3
1		6	1	#NULL!	#NULL!	#NULL!	#NULL!	#NULL!		1	2	7	1	85705	1	2	0	2	3	3	4	4	3	3	4	4	3	3	3	3	2	1	4	0	1	0	0	0	0	0	0	0	0	0	0	0	0	1	3
1		7	1	#NULL!	#NULL!	#NULL!	#NULL!	#NULL!		2	3	5	1	89101	4	4	4	4	4	3	4	4	3	5	5	5	4	3	3	3	2	3	5	1	0	0	1	1	1	0	0	0	0	0	0	0	0	1	3
1		4	1	#NULL!	#NULL!	#NULL!	#NULL!	#NULL!		1	3	3	1	89142	3	2	3	4	3	3	5	5	4	5	4	4	4	4	4	5	2	1	6	1	1	1	0	0	1	1	0	0	0	0	0	0	0	1	3
1		6	1	#NULL!	#NULL!	#NULL!	#NULL!	#NULL!		2	3	3	1	25702	0	0	0	4	0	4	3	3	3	3	5	5	3	3	3	3	2	3	4	1	0	0	0	1	0	0	0	0	0	0	0	0	0	1	3
1		7	1	#NULL!	#NULL!	#NULL!	#NULL!	#NULL!		2	5	7	1	03060	2	3	4	4	4	4	5	5	5	5	5	5	5	4	3	3	2	3	4	0	0	1	1	0	1	0	0	0	0	0	0	0	0	1	3
1		7	1	#NULL!	#NULL!	#NULL!	#NULL!	#NULL!		2	6	12	2	89166	4	4	4	4	4	4	5	5	5	4	5	4	3	3	3	3	#NULL!	1	6	0	1	0	0	0	0	0	0	1	0	0	1	0	0	0	3
1		6	1	#NULL!	#NULL!	#NULL!	#NULL!	#NULL!		2	5	7	2	20904	2	2	2	3	2	2	4	3	3	4	4	4	2	2	2	2	#NULL!	1	6	1	0	0	0	0	0	0	0	0	0	0	0	0	0	1	3
1		7	1	#NULL!	#NULL!	#NULL!	#NULL!	#NULL!		2	6	11	2	72758	0	2	1	4	2	1	5	5	3	5	5	5	4	3	3	2	#NULL!	3	5	1	0	0	0	0	0	0	0	0	0	0	1	0	0	0	3
1		7	#NULL!	1	#NULL!	#NULL!	#NULL!	#NULL!		2	3	6	2	33033	3	3	3	3	3	3	3	4	3	4	5	5	4	4	3	4	2	1	5	1	0	0	0	0	0	0	0	0	0	0	0	0	0	1	3
1		8	1	#NULL!	#NULL!	#NULL!	#NULL!	#NULL!		2	5	6	2	76116	4	4	4	4	4	4	3	3	3	4	4	4	4	3	3	3	#NULL!	2	6	1	0	0	0	0	0	0	0	0	0	0	0	0	0	1	3
1		3	1	#NULL!	#NULL!	#NULL!	#NULL!	#NULL!		2	2	1	1	44101	2	2	2	2	2	2	3	3	3	3	3	3	3	3	3	3	#NULL!	1	6	1	0	0	0	0	0	0	0	0	0	0	0	0	0	1	3
1		7	1	#NULL!	#NULL!	#NULL!	#NULL!	#NULL!		2	6	7	2	14221	0	2	0	3	2	0	3	3	3	4	4	4	3	1	1	1	2	3	5	1	0	0	0	0	0	0	0	0	0	0	1	0	0	0	3
1		8	1	#NULL!	#NULL!	#NULL!	#NULL!	#NULL!		2	4	7	2	60067	2	3	2	2	2	3	4	4	4	4	4	4	4	3	3	3	#NULL!	1	5	1	1	1	1	1	1	1	0	0	0	0	0	0	0	1	3
1		6	1	#NULL!	#NULL!	#NULL!	#NULL!	#NULL!		2	5	6	2	53154	3	3	3	3	2	2	3	3	3	4	4	4	3	3	3	3	#NULL!	4	5	0	0	0	1	0	0	0	0	0	0	0	1	0	0	0	3
1		8	#NULL!	1	#NULL!	#NULL!	#NULL!	#NULL!		2	3	5	1	90806	4	4	4	4	4	4	5	5	1	5	5	5	1	1	1	1	#NULL!	2	6	1	0	0	0	0	0	0	0	0	0	0	0	0	0	1	3
1		7	1	#NULL!	#NULL!	#NULL!	#NULL!	#NULL!		2	3	6	2	98661	3	4	4	4	4	4	5	2	2	4	4	4	1	1	1	1	#NULL!	2	6	0	0	1	0	0	0	0	0	1	0	0	1	0	0	0	3
1		8	1	#NULL!	#NULL!	#NULL!	#NULL!	#NULL!		2	7	11	2	70605	3	3	3	3	3	3	5	5	5	5	5	5	5	4	1	1	#NULL!	1	1	0	1	1	1	1	1	0	0	0	0	0	0	0	0	1	3
1		6	1	#NULL!	#NULL!	#NULL!	#NULL!	#NULL!		2	5	8	2	29483	1	3	3	4	3	2	3	3	3	4	5	5	3	3	3	3	2	3	5	0	0	1	0	0	0	0	0	0	0	0	0	0	0	1	3
1		8	1	#NULL!	#NULL!	#NULL!	#NULL!	#NULL!		2	7	9	1	90278	3	3	2	4	2	4	4	4	3	4	5	4	4	3	1	2	1	3	6	1	0	0	0	0	0	0	0	0	0	0	1	0	0	0	3
1		8	#NULL!	#NULL!	#NULL!	#NULL!	#NULL!	1		1	4	4	1	76012	3	3	3	3	3	3	4	5	4	5	5	5	5	4	4	5	2	1	3	1	0	0	0	0	0	0	0	0	0	0	0	0	0	1	3
1		7	#NULL!	1	#NULL!	#NULL!	#NULL!	#NULL!		2	2	4	2	67460	1	2	1	4	4	2	5	5	5	5	5	5	5	3	3	3	#NULL!	1	5	1	0	0	0	0	0	0	0	0	0	0	0	0	0	1	3
1		8	1	#NULL!	#NULL!	#NULL!	#NULL!	#NULL!		2	3	9	2	89012	3	3	2	3	3	2	5	5	5	5	5	5	5	5	5	5	2	1	6	1	0	0	0	0	0	0	0	0	0	0	0	0	0	1	3
1		7	1	#NULL!	#NULL!	#NULL!	#NULL!	#NULL!		2	6	4	2	90620	4	4	4	4	4	3	3	3	3	4	4	4	4	2	2	2	2	3	6	1	0	0	0	0	0	0	0	1	0	0	1	0	1	0	3
1		7	1	#NULL!	#NULL!	#NULL!	#NULL!	#NULL!		2	4	7	1	92506	4	4	4	4	4	4	3	3	3	5	5	5	2	4	4	4	#NULL!	4	4	1	0	0	0	1	0	0	0	0	0	0	1	0	0	0	3
1		7	1	#NULL!	#NULL!	#NULL!	#NULL!	#NULL!		2	3	6	2	31763	3	4	4	4	4	4	4	4	4	5	5	5	3	3	3	3	#NULL!	1	6	1	1	1	1	1	1	1	0	0	0	0	0	0	0	1	3
1		8	1	#NULL!	#NULL!	#NULL!	#NULL!	#NULL!		2	5	3	1	10019	1	1	0	4	4	0	5	5	5	5	5	5	4	3	3	3	#NULL!	1	5	1	0	0	0	0	0	0	0	0	0	0	0	0	0	1	3
1		7	1	#NULL!	#NULL!	#NULL!	#NULL!	#NULL!		2	5	12	2	21044	3	3	2	4	3	3	4	3	2	4	5	5	4	2	1	2	2	3	5	1	1	1	0	1	0	0	0	0	0	0	1	0	0	0	3
1		6	1	#NULL!	#NULL!	#NULL!	#NULL!	#NULL!		2	3	2	1	85635	1	3	1	2	2	2	3	3	3	3	3	3	3	4	4	4	2	4	6	1	0	0	1	1	1	0	0	0	0	0	0	0	0	1	3
1		9	1	#NULL!	#NULL!	#NULL!	#NULL!	#NULL!		2	5	4	2	07922	3	3	2	3	4	4	4	4	4	5	4	5	4	3	4	4	#NULL!	4	5	1	0	0	0	0	0	0	0	1	0	0	0	0	0	0	3
1		8	1	#NULL!	#NULL!	#NULL!	#NULL!	#NULL!		2	2	5	2	98512	4	4	4	4	4	4	5	5	5	5	5	5	5	5	1	5	1	1	1	1	0	0	0	0	0	0	0	0	0	0	0	0	0	1	3
1		7	#NULL!	#NULL!	#NULL!	1	#NULL!	#NULL!		2	5	5	2	90640	3	3	1	4	1	2	4	4	3	4	4	4	3	3	3	3	2	4	5	0	1	0	1	0	0	0	0	1	0	0	1	0	1	0	3
1		7	1	#NULL!	#NULL!	#NULL!	#NULL!	#NULL!		2	6	11	2	02664	2	3	2	4	4	4	3	3	3	4	4	4	3	3	3	3	2	3	5	1	0	0	0	0	0	0	0	0	0	0	0	0	0	1	3
1		7	1	#NULL!	#NULL!	#NULL!	#NULL!	#NULL!		2	1	7	1	59937	4	4	4	4	3	3	1	1	1	4	4	4	2	3	3	3	#NULL!	1	5	1	0	0	0	0	0	0	0	0	0	0	0	0	0	1	3
1		7	1	#NULL!	#NULL!	#NULL!	#NULL!	#NULL!		2	4	4	2	75052	4	4	3	4	4	4	5	5	5	5	5	5	4	5	5	5	#NULL!	1	5	1	0	0	0	0	0	0	0	0	0	0	0	0	0	1	3
1		3	#NULL!	#NULL!	#NULL!	#NULL!	#NULL!	1	Mixed	1	3	5	2	89145	2	0	0	4	4	4	4	4	4	4	4	4	1	1	1	1	2	3	5	0	1	1	1	1	1	0	0	0	0	0	1	0	0	0	3
1		7	1	#NULL!	#NULL!	#NULL!	#NULL!	#NULL!		2	5	10	2	77447	4	4	4	4	4	4	5	5	5	5	5	5	5	5	3	3	2	3	5	1	1	1	1	1	1	0	0	0	0	0	1	0	0	0	3
1		8	1	#NULL!	#NULL!	#NULL!	#NULL!	#NULL!		2	3	8	2	95123	3	3	1	3	3	1	5	5	3	5	5	5	5	4	3	3	#NULL!	1	6	1	0	0	0	0	0	0	0	0	0	0	0	0	0	1	3
1		7	1	#NULL!	#NULL!	#NULL!	#NULL!	#NULL!		2	3	5	2	53074	3	4	3	3	3	4	4	5	4	4	4	5	3	3	3	3	2	3	3	1	0	0	0	0	0	0	0	0	0	0	1	0	0	0	3
1		7	1	#NULL!	#NULL!	#NULL!	#NULL!	#NULL!		2	3	5	2	17859	4	4	4	2	2	2	1	2	1	1	1	1	1	1	1	1	#NULL!	1	6	1	0	0	0	0	0	0	0	0	0	0	0	0	0	1	3
1		7	1	#NULL!	1	#NULL!	#NULL!	#NULL!		2	5	2	2	52722	3	3	3	3	3	2	5	5	4	5	5	5	4	3	3	2	2	3	3	1	0	0	0	0	0	0	0	0	0	0	0	0	0	1	3
1		9	1	#NULL!	#NULL!	#NULL!	#NULL!	#NULL!		2	7	1	2	02914	4	4	4	4	4	4	5	5	3	5	5	5	5	3	4	3	#NULL!	2	5	1	1	1	1	1	1	1	0	0	0	0	0	0	0	1	3
1		5	1	#NULL!	#NULL!	#NULL!	#NULL!	#NULL!		2	5	10	2	32771	3	3	3	4	4	4	4	4	2	5	5	5	3	3	2	2	2	3	4	0	0	1	0	0	0	1	0	0	0	0	0	0	0	1	3
1		7	1	#NULL!	#NULL!	#NULL!	#NULL!	#NULL!		2	5	11	2	07649	3	4	4	4	3	3	4	4	4	4	4	4	4	2	2	3	#NULL!	1	5	1	0	0	0	0	0	0	0	0	0	0	0	0	0	1	3
1		6	1	#NULL!	#NULL!	#NULL!	#NULL!	#NULL!		2	5	12	2	22003	2	2	2	2	2	2	4	4	4	4	4	4	4	3	3	3	#NULL!	3	6	0	1	1	1	0	1	0	0	0	0	0	1	1	0	0	3
1		7	1	#NULL!	#NULL!	#NULL!	#NULL!	#NULL!		2	4	7	2	79924	4	4	4	4	4	4	4	3	3	4	4	4	3	2	2	2	2	1	5	1	0	0	0	0	0	0	0	0	0	0	0	0	0	1	3
1		8	1	#NULL!	#NULL!	#NULL!	#NULL!	#NULL!		2	6	12	2	85263	1	4	4	4	2	2	5	5	5	5	5	5	4	5	4	4	2	3	5	1	0	0	0	0	0	0	0	0	0	0	0	0	0	1	3
1		5	#NULL!	#NULL!	#NULL!	#NULL!	#NULL!	1	mixed	1	3	6	2	77089	4	4	4	4	4	4	2	2	2	5	5	5	5	1	1	1	2	3	5	1	0	0	0	0	0	0	0	0	0	0	1	0	1	0	3
1		7	1	#NULL!	#NULL!	#NULL!	#NULL!	#NULL!		2	4	10	2	29456	4	4	4	4	4	4	3	4	3	4	5	5	4	2	2	2	2	3	6	1	0	0	1	1	0	0	0	0	0	0	1	0	1	0	3
1		7	1	#NULL!	#NULL!	#NULL!	#NULL!	#NULL!		2	6	11	2	53022	4	4	4	4	4	4	3	3	3	4	4	4	1	2	2	2	2	1	5	1	0	0	0	0	0	0	0	0	0	0	0	0	0	1	3
1		6	1	#NULL!	#NULL!	#NULL!	#NULL!	#NULL!		2	5	7	2	08054	4	4	2	4	3	2	4	3	3	4	5	5	5	4	3	3	2	3	3	1	0	0	0	1	1	0	0	0	0	0	0	0	0	1	3
1		6	1	#NULL!	#NULL!	#NULL!	#NULL!	#NULL!		2	5	9	2	48081	1	1	1	2	2	2	3	3	3	4	4	4	4	2	2	2	2	4	3	0	0	1	0	0	0	0	0	0	0	0	0	0	0	1	3
1		6	1	#NULL!	#NULL!	#NULL!	#NULL!	#NULL!		2	5	8	2	80917	3	2	2	3	3	3	4	4	4	4	4	4	4	3	3	3	2	4	5	1	0	0	0	0	0	0	0	0	0	0	0	0	0	1	3
1		6	1	#NULL!	#NULL!	#NULL!	#NULL!	#NULL!		2	6	12	2	01760	2	4	1	3	2	1	3	2	2	4	4	4	1	1	1	1	2	3	5	1	0	0	0	0	0	0	0	1	1	1	1	1	1	0	3
1		5	1	#NULL!	#NULL!	#NULL!	#NULL!	#NULL!		2	5	6	2	20850	0	3	0	3	3	3	3	3	3	4	4	3	3	2	2	2	#NULL!	1	5	1	0	0	0	0	0	0	0	1	0	1	1	0	1	0	3
1		8	#NULL!	#NULL!	#NULL!	1	#NULL!	#NULL!		2	6	11	2	94015	3	3	3	3	3	3	2	4	4	3	4	4	4	4	4	4	2	1	6	1	0	0	0	0	0	0	0	0	0	0	0	0	0	1	3
1		7	1	#NULL!	#NULL!	#NULL!	#NULL!	#NULL!		2	3	11	2	91350	3	2	3	4	4	3	4	4	4	4	4	4	4	4	4	4	#NULL!	1	6	1	0	0	0	0	0	0	0	0	0	0	0	0	0	1	3
1		7	1	#NULL!	#NULL!	#NULL!	#NULL!	#NULL!		2	5	9	2	17112	4	4	4	4	4	3	4	4	4	5	5	5	5	4	4	4	#NULL!	3	3	1	0	0	1	1	1	0	0	0	0	0	0	0	0	1	3
1		7	1	#NULL!	#NULL!	#NULL!	#NULL!	#NULL!		2	5	11	2	60131	2	3	2	3	3	4	4	4	4	5	5	5	4	4	3	3	2	1	5	1	0	0	0	0	0	0	0	0	0	0	0	0	0	1	3
1		7	1	#NULL!	#NULL!	#NULL!	#NULL!	#NULL!		2	2	4	2	89118	1	3	2	4	4	3	5	5	4	5	5	5	4	4	3	4	#NULL!	1	5	1	0	1	1	1	1	0	0	0	0	0	0	0	0	1	3
1		6	1	#NULL!	#NULL!	#NULL!	#NULL!	#NULL!		2	2	3	1	47240	2	2	2	2	2	2	3	3	3	3	3	3	3	3	3	3	1	1	6	1	0	1	0	0	0	0	0	0	0	0	0	0	0	1	3
1		8	1	#NULL!	#NULL!	#NULL!	#NULL!	#NULL!		2	3	5	1	76148	2	3	2	3	3	3	1	1	5	1	1	2	1	3	3	3	2	1	5	0	0	1	0	0	0	0	0	0	0	0	0	0	1	0	3
1		7	1	#NULL!	#NULL!	#NULL!	#NULL!	#NULL!		2	3	3	2	29418	2	2	2	3	3	3	3	3	3	4	4	5	3	2	2	2	#NULL!	4	5	0	1	1	0	0	0	0	0	0	0	1	0	0	0	0	3
1		7	1	#NULL!	#NULL!	#NULL!	#NULL!	#NULL!		2	2	4	2	29483	0	2	2	4	4	4	4	4	3	5	5	5	5	3	3	3	1	1	5	1	0	0	0	0	0	0	0	0	0	0	0	0	0	1	3
1		7	1	#NULL!	#NULL!	#NULL!	#NULL!	#NULL!		2	5	3	1	68503	4	4	4	4	4	4	5	5	5	5	5	5	5	5	5	5	#NULL!	1	1	1	0	0	0	0	0	0	0	0	0	0	0	0	0	1	3
1		7	1	#NULL!	#NULL!	#NULL!	#NULL!	#NULL!		2	3	2	1	10003	3	3	3	3	3	3	4	4	4	4	4	4	4	4	4	4	2	3	2	1	0	0	0	0	0	0	0	0	0	0	1	0	0	0	3
1		8	1	#NULL!	#NULL!	#NULL!	#NULL!	#NULL!		2	6	12	2	94920	3	3	3	3	3	3	4	2	2	4	4	4	2	2	1	1	2	3	5	0	1	0	0	0	0	0	0	1	0	0	1	0	0	0	3
1		7	#NULL!	#NULL!	#NULL!	#NULL!	#NULL!	1	caucasian("white" is not a race)	2	4	9	2	53589	3	3	2	4	4	3	4	4	3	4	5	5	4	3	1	2	2	1	5	0	1	1	0	0	0	0	0	1	0	0	1	0	0	0	3
1		8	1	#NULL!	#NULL!	#NULL!	#NULL!	#NULL!		2	5	5	2	94551	3	3	3	4	4	3	4	4	4	5	5	5	5	4	3	3	2	3	5	0	0	0	1	1	0	0	0	0	0	0	1	0	0	0	3
1		5	1	#NULL!	1	#NULL!	#NULL!	#NULL!		2	5	11	2	86334	3	2	1	3	2	3	4	4	4	5	5	5	4	4	4	4	#NULL!	2	5	0	1	1	1	1	1	0	0	0	0	0	0	0	0	1	3
1		9	1	#NULL!	#NULL!	#NULL!	#NULL!	#NULL!		2	5	4	2	11733	1	0	0	2	1	0	3	3	2	3	5	4	3	3	3	2	#NULL!	1	6	1	0	0	0	0	0	0	0	0	0	0	0	0	0	1	3
1		7	1	#NULL!	#NULL!	#NULL!	#NULL!	#NULL!		2	3	6	2	46237	3	3	3	4	4	3	5	5	5	5	5	5	1	1	1	1	2	2	1	0	0	1	0	0	1	0	0	0	0	0	0	0	0	1	3
1		8	1	#NULL!	#NULL!	#NULL!	#NULL!	#NULL!		2	6	12	2	48423	3	3	3	3	3	3	4	2	3	5	5	5	5	3	2	2	1	1	6	1	0	0	0	0	0	0	0	1	0	0	1	0	1	0	3
1		6	1	#NULL!	#NULL!	#NULL!	#NULL!	#NULL!		2	5	8	2	81007	2	4	2	3	3	3	3	4	3	5	5	5	3	2	2	3	2	3	5	1	0	0	0	0	0	0	0	0	0	0	0	0	0	1	3
1		7	1	#NULL!	#NULL!	#NULL!	#NULL!	#NULL!		2	5	7	2	14580	2	3	2	3	3	4	5	5	4	5	5	5	5	5	5	5	2	4	6	0	1	1	1	0	1	0	0	0	0	0	0	0	0	1	3
1		6	1	#NULL!	#NULL!	#NULL!	#NULL!	#NULL!		2	2	3	1	08401	1	3	3	4	4	3	5	5	5	5	5	5	5	5	5	4	2	1	6	1	0	1	1	1	1	1	0	0	0	0	0	0	0	1	3
1		6	1	#NULL!	#NULL!	#NULL!	#NULL!	#NULL!		2	2	5	1	78130	3	3	0	1	1	1	2	2	2	3	3	3	3	4	4	4	#NULL!	5	4	1	0	0	0	0	0	0	0	0	0	0	0	0	0	1	3
1		7	1	#NULL!	#NULL!	#NULL!	#NULL!	#NULL!		2	5	8	2	13424	1	1	1	1	1	1	4	4	4	4	4	4	4	4	4	4	2	3	6	1	0	0	0	0	0	0	0	0	0	0	0	0	0	1	3
1		7	1	#NULL!	#NULL!	#NULL!	#NULL!	#NULL!		2	5	12	2	77433	4	4	4	4	4	4	4	4	3	4	4	5	3	2	2	1	2	3	5	1	0	0	0	0	0	0	0	0	0	0	0	0	0	1	3
1		7	1	#NULL!	#NULL!	#NULL!	#NULL!	#NULL!		2	2	6	2	55016	4	4	4	4	4	4	5	5	4	5	5	5	4	5	3	3	#NULL!	2	6	1	0	0	0	0	0	0	0	0	0	0	1	0	0	0	3
1		7	1	#NULL!	#NULL!	#NULL!	#NULL!	#NULL!		2	6	3	2	98008	4	4	4	4	4	4	3	3	3	5	5	5	4	3	3	3	2	3	5	1	0	0	0	0	1	0	0	0	0	0	0	0	0	1	3
1		8	1	#NULL!	#NULL!	#NULL!	#NULL!	#NULL!		2	5	4	2	92604	2	2	2	2	2	2	5	5	5	5	5	5	5	4	4	4	#NULL!	2	5	1	0	0	0	0	0	0	0	0	0	0	0	0	0	1	3
1		7	1	#NULL!	#NULL!	#NULL!	#NULL!	#NULL!		2	5	11	2	29909	4	4	4	3	1	3	4	4	4	5	5	5	3	3	1	3	2	3	6	1	1	1	0	1	1	0	0	0	0	0	1	0	0	0	3
1		7	1	#NULL!	#NULL!	#NULL!	#NULL!	#NULL!		2	3	4	2	08070	1	2	0	4	4	0	1	1	1	5	5	5	1	1	1	1	#NULL!	1	1	1	0	0	0	0	0	0	0	0	0	0	0	0	0	1	3
1		7	1	#NULL!	#NULL!	#NULL!	#NULL!	#NULL!		2	6	10	2	98685	1	1	1	1	1	3	5	3	4	5	5	5	2	2	2	2	1	1	5	1	0	0	0	0	0	0	0	0	0	0	0	0	0	1	3
1		5	1	#NULL!	#NULL!	#NULL!	#NULL!	#NULL!		2	5	3	2	18504	2	2	2	2	3	2	4	4	4	4	4	4	4	4	4	4	1	1	1	1	0	0	0	0	0	0	0	0	0	0	0	0	0	1	3
1		8	1	#NULL!	#NULL!	#NULL!	#NULL!	#NULL!		2	4	12	1	54494	2	3	0	3	0	3	1	3	1	1	1	1	3	5	3	5	#NULL!	1	5	1	0	0	1	1	1	0	0	0	0	0	0	0	0	1	3
1		8	1	#NULL!	#NULL!	#NULL!	#NULL!	#NULL!		2	5	6	2	31419	3	4	4	4	4	4	5	5	5	5	5	5	5	3	3	3	2	3	6	1	0	0	0	1	0	0	0	1	0	0	1	0	1	0	3
1		8	1	#NULL!	#NULL!	#NULL!	#NULL!	#NULL!		2	2	6	2	32765	0	4	3	4	4	4	5	5	5	5	5	5	5	5	5	4	2	3	5	1	0	0	0	0	1	0	0	0	0	0	0	0	0	1	3
1		8	1	#NULL!	#NULL!	#NULL!	#NULL!	#NULL!		2	3	7	2	89147	4	4	4	4	3	4	5	3	3	4	4	4	3	1	1	1	#NULL!	4	2	1	0	0	0	0	0	0	0	0	0	0	0	0	0	1	3
1		7	#NULL!	#NULL!	#NULL!	1	#NULL!	#NULL!		2	4	3	2	96734	3	3	3	3	3	3	5	5	5	5	5	5	5	4	4	4	#NULL!	2	4	0	0	1	0	0	0	0	0	1	0	0	0	0	0	0	3
1		7	1	#NULL!	#NULL!	#NULL!	#NULL!	#NULL!		2	5	3	2	27604	3	4	4	4	4	4	5	5	5	5	5	5	5	3	3	3	2	3	5	1	0	0	0	0	0	0	0	0	0	0	0	0	0	1	3
1		7	1	#NULL!	#NULL!	#NULL!	#NULL!	#NULL!		2	2	3	1	46201	2	3	2	4	4	4	4	3	3	5	5	4	3	3	3	3	#NULL!	1	6	1	0	0	0	0	0	0	0	0	0	0	0	0	0	1	3
1		4	#NULL!	1	#NULL!	#NULL!	#NULL!	#NULL!		2	2	3	1	29420	2	3	4	4	4	3	4	4	3	4	4	4	4	3	4	3	#NULL!	1	5	1	1	1	1	1	1	1	0	0	0	0	0	0	0	1	3
1		8	1	#NULL!	#NULL!	#NULL!	#NULL!	#NULL!		2	3	7	2	32159	0	0	0	2	2	2	4	4	4	4	4	4	2	2	2	2	2	3	6	1	0	0	0	0	0	0	0	0	0	0	0	0	0	1	3
1		5	1	#NULL!	#NULL!	#NULL!	#NULL!	#NULL!		2	3	1	2	60115	0	1	0	4	0	0	1	1	1	5	5	3	1	1	1	1	1	2	5	0	0	0	0	1	0	0	0	0	0	0	1	0	1	0	3
1		8	1	#NULL!	#NULL!	#NULL!	#NULL!	#NULL!		2	5	4	1	52806	1	3	3	3	3	3	4	4	4	5	5	5	4	2	2	2	#NULL!	1	5	1	0	0	0	0	0	0	0	0	0	0	0	0	0	1	3
1		3	1	#NULL!	#NULL!	#NULL!	#NULL!	#NULL!		1	6	4	1	32801	1	2	2	4	4	4	1	4	2	1	1	1	1	4	4	5	#NULL!	5	2	1	0	0	0	0	0	0	0	0	0	0	0	0	0	1	3
1		7	1	#NULL!	#NULL!	#NULL!	#NULL!	#NULL!		2	3	5	1	54937	4	4	4	4	4	4	4	4	3	5	5	5	5	3	3	3	2	3	5	1	0	0	0	0	0	0	0	0	0	0	0	0	0	1	3
1		4	1	#NULL!	#NULL!	#NULL!	#NULL!	#NULL!		2	3	1	2	74902	2	2	2	3	3	3	2	2	4	4	4	4	3	5	3	4	#NULL!	1	6	0	0	1	0	1	1	0	0	0	0	0	1	0	0	0	3
1		7	1	#NULL!	#NULL!	#NULL!	#NULL!	#NULL!		2	5	7	2	99709	4	3	2	4	3	1	2	2	2	5	5	4	1	3	1	1	2	3	5	1	0	0	0	0	0	0	0	0	0	0	0	0	0	1	3
1		8	1	#NULL!	#NULL!	#NULL!	#NULL!	#NULL!		2	5	12	2	26003	4	4	3	3	3	4	4	4	4	4	4	4	4	2	2	1	2	3	5	1	0	0	0	0	0	0	0	1	1	1	1	1	1	0	3
1		8	1	#NULL!	#NULL!	#NULL!	#NULL!	#NULL!		2	5	7	2	34446	3	4	3	4	4	3	4	3	3	5	5	5	4	3	3	3	#NULL!	3	5	1	0	0	0	0	0	0	0	1	0	0	0	0	0	0	3
1		8	1	#NULL!	#NULL!	#NULL!	#NULL!	#NULL!		2	6	12	2	85259	2	3	3	1	1	2	4	4	4	5	5	5	5	4	4	4	#NULL!	5	6	1	1	1	1	1	1	1	0	0	0	0	0	0	0	1	3
1		7	1	#NULL!	#NULL!	#NULL!	#NULL!	#NULL!		2	2	5	2	83607	3	3	4	0	0	0	5	5	1	3	3	3	3	1	1	3	2	1	6	1	0	0	0	0	0	0	0	0	0	0	0	0	0	1	3
1		7	1	#NULL!	#NULL!	#NULL!	#NULL!	#NULL!		2	5	3	1	80112	3	3	3	3	3	3	3	3	3	4	4	4	3	3	3	3	2	1	5	1	0	0	0	0	0	0	0	0	0	0	0	0	0	1	3
1		7	1	#NULL!	#NULL!	#NULL!	#NULL!	#NULL!		2	5	11	2	63026	4	4	4	4	4	4	4	4	3	5	5	5	4	3	4	3	2	3	5	0	1	0	0	0	0	0	0	0	0	0	0	0	0	1	3
1		7	1	#NULL!	#NULL!	#NULL!	#NULL!	#NULL!		2	6	12	2	07646	2	2	2	3	3	2	4	4	4	5	5	5	4	5	3	3	2	3	6	1	0	0	0	0	0	0	0	0	0	0	0	0	0	1	3
1		7	#NULL!	#NULL!	1	#NULL!	#NULL!	#NULL!		2	5	10	2	73008	4	4	4	4	4	4	5	5	3	5	5	5	3	2	2	2	1	5	5	1	0	0	0	0	0	0	0	1	0	0	1	0	1	0	3
1		9	1	#NULL!	#NULL!	#NULL!	#NULL!	#NULL!		2	6	10	2	37659	3	4	3	4	3	4	5	4	3	5	5	5	5	3	3	4	2	3	5	1	1	1	1	1	1	0	0	0	0	0	0	0	0	1	3
1		4	1	#NULL!	#NULL!	#NULL!	#NULL!	#NULL!		2	4	6	2	17551	3	4	4	4	3	1	1	1	1	5	5	5	1	2	1	1	2	3	3	0	1	0	0	1	1	0	0	0	0	0	0	0	0	1	3
1		6	1	#NULL!	#NULL!	#NULL!	#NULL!	#NULL!		2	2	10	2	49286	2	4	4	4	4	2	5	1	3	3	4	4	1	1	1	1	2	1	5	1	0	1	0	0	1	0	0	1	0	0	1	0	0	0	3
1		6	1	#NULL!	#NULL!	#NULL!	#NULL!	#NULL!		2	5	1	1	97302	3	4	3	4	1	1	3	3	3	4	4	4	3	3	3	3	#NULL!	1	6	1	0	0	0	0	0	0	0	0	0	0	0	0	0	1	3
1		7	1	#NULL!	#NULL!	#NULL!	#NULL!	#NULL!		2	6	5	2	24018	1	2	2	4	4	4	4	4	3	5	4	4	3	2	2	2	2	3	5	0	1	0	0	0	0	0	0	1	0	0	1	0	0	0	3
1		7	1	#NULL!	#NULL!	#NULL!	#NULL!	#NULL!		2	3	3	1	45449	4	4	4	4	3	4	5	5	5	5	5	5	5	5	5	4	#NULL!	1	6	1	0	0	0	0	1	1	0	1	0	0	1	0	1	0	3
1		6	1	#NULL!	#NULL!	#NULL!	#NULL!	#NULL!		2	2	9	2	21078	4	4	4	4	4	4	5	5	5	5	5	5	1	1	1	1	1	4	1	1	0	0	0	0	0	0	0	0	0	0	0	0	0	1	3
1		7	1	#NULL!	#NULL!	#NULL!	#NULL!	#NULL!		2	2	11	1	92563	3	3	3	4	4	4	5	5	5	5	5	5	3	5	5	3	2	1	5	0	1	1	0	0	0	0	0	0	0	1	1	0	0	0	3
1		7	1	#NULL!	#NULL!	#NULL!	#NULL!	#NULL!		1	7	11	2	92692	2	1	1	3	2	1	4	4	3	4	4	4	3	4	3	3	#NULL!	3	6	1	0	0	0	0	0	0	0	0	0	0	0	0	0	1	3
1		7	#NULL!	#NULL!	#NULL!	#NULL!	#NULL!	1		1	5	2	2	98226	3	4	4	3	2	2	1	5	1	3	4	4	3	1	1	1	#NULL!	1	6	1	0	0	0	0	0	0	0	0	1	1	1	1	1	0	3
1		4	1	#NULL!	#NULL!	#NULL!	#NULL!	#NULL!		2	6	11	1	90045	4	4	4	4	4	4	5	5	5	5	5	5	5	5	5	5	2	4	6	1	0	0	0	0	0	0	0	0	0	0	0	0	0	1	3
1		7	1	#NULL!	1	#NULL!	#NULL!	#NULL!		2	4	6	2	32763	3	4	4	3	4	4	3	5	3	5	4	4	3	1	1	1	2	2	5	1	0	0	0	0	0	0	0	0	0	0	1	1	1	0	3
1		5	1	#NULL!	#NULL!	#NULL!	#NULL!	#NULL!		2	5	1	2	20190	2	4	0	3	2	2	3	3	3	3	4	3	3	3	3	3	2	2	5	0	1	0	0	0	0	0	0	0	0	0	0	0	0	1	3
1		7	1	#NULL!	#NULL!	#NULL!	#NULL!	#NULL!		2	6	12	1	77005	4	4	3	4	4	4	5	5	3	5	5	5	3	1	1	1	2	3	6	1	0	0	0	0	0	0	0	0	0	0	0	0	0	1	3
1		4	1	#NULL!	#NULL!	#NULL!	#NULL!	#NULL!		2	6	10	2	02476	2	3	2	2	2	3	5	5	5	5	5	5	4	3	3	3	2	3	5	1	0	0	0	0	0	0	0	0	0	0	1	0	0	0	3
1		5	1	#NULL!	#NULL!	#NULL!	#NULL!	#NULL!		2	5	2	1	85710	1	1	1	1	1	1	4	4	4	2	4	4	2	2	2	2	2	1	6	1	0	0	0	0	0	0	0	0	0	0	1	0	0	0	3
1		7	1	#NULL!	#NULL!	#NULL!	#NULL!	#NULL!		2	5	7	2	10314	3	3	3	3	3	3	4	4	4	4	4	4	4	4	4	4	2	3	3	1	1	1	0	1	1	0	0	0	0	0	0	0	0	1	3
1		7	1	#NULL!	#NULL!	#NULL!	#NULL!	#NULL!		2	2	4	1	85650	4	4	4	4	4	4	5	5	5	5	5	5	5	1	1	3	2	1	6	1	0	0	0	0	0	0	0	0	0	0	0	0	0	1	3
1		7	1	#NULL!	#NULL!	#NULL!	#NULL!	#NULL!		2	2	5	2	53022	4	4	4	3	3	2	4	4	3	5	5	4	3	3	3	3	2	3	5	1	0	0	0	0	0	0	0	0	0	0	1	0	0	0	3
1		7	1	#NULL!	#NULL!	#NULL!	#NULL!	#NULL!		2	4	5	2	45152	3	4	3	4	4	4	4	5	4	5	5	5	5	5	4	4	1	1	5	1	0	0	0	0	0	0	0	0	0	0	0	0	0	1	3
1		5	1	#NULL!	#NULL!	#NULL!	#NULL!	#NULL!		2	6	11	2	12203	3	3	3	3	3	3	4	4	4	5	5	5	4	4	4	4	1	1	6	1	1	1	0	0	1	1	0	0	0	0	0	0	0	1	3
1		7	1	#NULL!	#NULL!	#NULL!	#NULL!	#NULL!		2	3	9	2	06037	4	4	4	4	4	4	4	4	3	4	4	4	3	3	3	3	#NULL!	2	5	1	0	0	0	0	0	0	0	0	0	0	1	0	0	0	3
1		3	#NULL!	#NULL!	#NULL!	#NULL!	#NULL!	1		2	2	1	2	28625	3	2	1	2	2	2	3	3	3	3	3	3	2	3	2	4	#NULL!	1	1	1	1	1	1	1	1	1	0	0	0	0	0	0	0	1	3
1		7	1	#NULL!	#NULL!	#NULL!	#NULL!	#NULL!		2	3	5	1	45209	4	4	4	4	4	4	4	4	3	4	4	4	3	3	3	3	2	2	2	1	0	0	0	0	0	0	0	0	0	0	0	0	0	1	3
1		6	1	#NULL!	#NULL!	#NULL!	#NULL!	#NULL!		2	3	3	2	17602	3	3	2	4	3	3	4	4	4	4	4	4	4	4	4	4	2	1	1	1	0	0	0	0	0	0	0	0	0	0	0	0	1	0	3
1		7	1	#NULL!	#NULL!	#NULL!	#NULL!	#NULL!		2	3	11	2	33947	3	3	3	4	4	3	4	4	3	5	5	4	3	3	3	2	2	3	5	1	0	0	0	0	0	0	0	0	0	0	1	0	0	0	3
1		7	1	#NULL!	#NULL!	#NULL!	#NULL!	#NULL!		2	4	6	2	85027	2	2	1	2	2	2	5	5	5	5	5	5	5	3	3	3	#NULL!	1	5	1	0	0	0	0	0	0	0	0	0	0	0	0	0	1	3
1		7	1	#NULL!	#NULL!	#NULL!	#NULL!	#NULL!		2	3	6	1	66085	2	4	4	2	3	3	3	3	3	4	4	4	3	3	3	3	2	1	5	1	1	1	0	0	0	0	0	0	0	0	1	0	0	0	3
1		7	1	#NULL!	#NULL!	#NULL!	#NULL!	#NULL!		2	6	4	1	43302	0	0	0	1	1	1	4	4	4	5	5	5	4	4	4	4	#NULL!	2	6	1	0	0	1	0	0	1	0	0	0	0	0	0	0	1	3
1		7	1	#NULL!	#NULL!	#NULL!	#NULL!	#NULL!		2	2	3	1	19120	3	4	3	4	4	4	4	4	4	5	5	5	5	3	3	3	#NULL!	1	5	1	0	0	0	0	0	0	0	0	0	0	0	0	0	1	3
1		7	1	#NULL!	#NULL!	#NULL!	#NULL!	#NULL!		2	5	8	2	84092	4	2	2	3	3	3	4	4	4	4	4	4	4	4	4	3	2	3	5	1	0	0	0	0	0	0	0	0	0	0	0	0	0	1	3
1		5	#NULL!	1	#NULL!	#NULL!	#NULL!	#NULL!		2	2	3	1	76014	0	0	1	3	3	2	3	4	3	5	5	5	4	3	4	3	#NULL!	2	5	1	0	0	0	1	1	1	0	0	0	0	0	0	0	1	3
1		4	1	#NULL!	#NULL!	#NULL!	#NULL!	#NULL!		2	5	11	2	92056	4	3	4	4	3	3	5	5	5	5	5	5	4	5	2	2	2	4	5	0	1	0	0	1	1	0	0	1	0	0	1	0	1	0	3
1		6	1	#NULL!	#NULL!	#NULL!	#NULL!	#NULL!		2	6	3	2	03867	4	4	4	4	4	4	3	3	3	3	4	5	3	3	3	3	2	3	5	1	0	0	0	0	0	0	0	0	0	0	1	0	0	0	3
1		7	1	#NULL!	#NULL!	#NULL!	#NULL!	#NULL!		2	5	2	2	85215	3	1	1	4	4	4	2	2	3	4	5	5	3	2	2	2	2	3	5	1	0	0	0	0	0	0	0	0	0	0	0	0	0	1	3
1		6	1	#NULL!	#NULL!	#NULL!	#NULL!	#NULL!		2	3	5	2	15906	2	2	2	3	3	2	1	3	1	1	1	1	1	5	5	5	#NULL!	1	5	1	0	0	0	0	0	0	0	0	0	0	0	0	0	1	3
1		7	1	#NULL!	#NULL!	#NULL!	#NULL!	#NULL!		2	5	2	2	60563	4	4	4	4	4	4	4	5	3	4	3	1	3	4	1	1	1	1	6	1	0	1	1	1	1	1	0	0	0	0	0	0	0	1	3
1		5	1	#NULL!	#NULL!	#NULL!	#NULL!	#NULL!		2	6	12	1	87113	2	3	2	3	3	2	3	3	3	4	4	4	4	3	3	3	#NULL!	1	5	1	0	0	0	0	0	0	0	0	0	0	0	0	0	1	3
1		5	#NULL!	#NULL!	#NULL!	1	#NULL!	#NULL!		2	3	1	2	97036	3	3	3	3	3	3	4	4	4	4	4	4	4	3	3	2	#NULL!	2	5	1	0	0	0	0	0	0	0	1	0	0	1	0	0	0	3
1		7	1	#NULL!	#NULL!	#NULL!	#NULL!	#NULL!		2	4	5	2	07728	1	4	1	4	3	2	4	3	3	5	5	4	4	2	5	3	#NULL!	1	5	0	0	1	1	0	1	0	0	0	0	0	1	1	0	0	3
1		7	1	#NULL!	#NULL!	#NULL!	#NULL!	#NULL!		2	6	10	2	33469	4	4	3	4	4	3	5	4	4	5	4	5	4	3	4	4	2	5	6	0	1	0	0	1	1	0	0	0	0	0	0	0	0	1	3
1		8	1	#NULL!	#NULL!	#NULL!	#NULL!	#NULL!		2	2	4	2	85213	3	3	3	4	3	3	5	5	5	5	5	5	5	2	2	2	#NULL!	4	5	1	0	0	0	0	0	0	0	0	0	0	0	0	0	1	3
1		8	1	#NULL!	#NULL!	#NULL!	#NULL!	#NULL!		2	5	3	2	90291	4	4	4	4	4	4	3	3	3	5	5	5	5	3	3	3	2	3	5	0	1	0	0	0	0	0	0	0	0	0	0	0	0	1	3
1		5	1	#NULL!	#NULL!	#NULL!	#NULL!	#NULL!		1	4	6	2	46038	0	0	0	4	2	4	4	4	4	4	5	5	3	4	4	4	2	3	5	1	0	0	0	0	0	0	0	0	0	0	0	0	0	1	3
1		3	1	#NULL!	#NULL!	#NULL!	#NULL!	#NULL!		2	5	7	2	32905	4	4	3	4	4	4	2	1	2	4	4	5	2	1	1	1	2	2	5	0	1	1	1	1	1	0	0	0	0	0	1	0	0	0	3
1		5	1	#NULL!	#NULL!	#NULL!	#NULL!	#NULL!		2	5	6	2	42503	2	4	4	4	4	4	4	4	3	5	5	5	2	2	1	1	#NULL!	4	5	1	0	0	0	0	0	0	0	0	0	0	0	0	0	1	3
1		6	1	#NULL!	#NULL!	#NULL!	#NULL!	#NULL!		2	5	10	2	75040	2	3	3	4	3	3	5	5	5	5	5	5	4	3	3	1	#NULL!	4	5	1	0	0	0	0	0	0	0	0	0	0	0	0	0	1	3
1		7	1	#NULL!	#NULL!	#NULL!	#NULL!	#NULL!		2	3	3	2	37087	4	4	4	4	4	4	5	5	5	4	4	5	3	3	2	1	#NULL!	5	6	1	0	0	0	0	0	0	0	0	0	0	0	0	0	1	3
1		7	1	#NULL!	#NULL!	#NULL!	#NULL!	#NULL!		2	3	11	1	68117	2	2	2	3	1	1	5	5	5	5	5	5	5	4	4	4	2	1	2	1	0	0	0	0	0	0	0	0	0	0	0	0	0	1	3
1		4	1	#NULL!	1	#NULL!	#NULL!	#NULL!		2	6	9	2	39211	2	3	2	2	2	1	3	3	2	3	5	5	2	3	3	2	#NULL!	4	5	0	1	1	0	1	0	0	0	0	0	0	1	0	1	0	3
1		7	1	#NULL!	#NULL!	#NULL!	#NULL!	#NULL!		2	5	3	2	99205	4	4	0	4	0	4	3	3	3	5	5	5	3	3	3	3	2	3	5	1	1	1	0	0	0	0	0	0	0	0	1	0	0	0	3
1		7	1	#NULL!	#NULL!	#NULL!	#NULL!	#NULL!		2	4	10	2	94519	3	3	3	4	4	4	2	2	2	4	4	4	2	1	1	1	#NULL!	1	5	1	0	0	0	0	0	0	0	0	0	0	0	0	0	1	3
1		7	1	#NULL!	#NULL!	#NULL!	#NULL!	#NULL!		2	3	9	2	18704	4	4	2	4	4	4	4	4	3	4	5	4	3	3	3	3	#NULL!	3	5	0	0	0	0	1	1	0	0	0	0	0	1	0	0	0	3
1		7	1	#NULL!	#NULL!	#NULL!	#NULL!	#NULL!		2	5	9	2	60173	4	4	4	4	4	4	5	4	3	5	5	5	2	5	2	3	1	1	6	1	0	0	0	0	0	0	0	0	0	0	0	0	0	1	3
1		6	1	#NULL!	#NULL!	#NULL!	#NULL!	#NULL!		1	3	4	1	34982	4	4	4	4	4	4	3	4	3	5	5	5	5	4	3	3	2	1	6	1	0	0	0	0	0	0	0	0	0	0	0	0	0	1	3
1		8	1	#NULL!	#NULL!	#NULL!	#NULL!	#NULL!		2	5	11	2	60403	1	1	1	2	2	2	5	5	5	5	5	5	5	1	1	1	#NULL!	2	5	1	1	1	1	1	1	1	0	0	0	0	0	0	0	1	3
1		6	1	#NULL!	#NULL!	#NULL!	#NULL!	#NULL!		1	2	1	1	79915	4	4	4	4	4	4	3	3	3	4	5	5	3	3	3	3	#NULL!	1	3	1	1	1	1	1	1	1	0	0	0	0	0	0	0	1	3
1		5	#NULL!	#NULL!	#NULL!	#NULL!	#NULL!	1	Prefer not to answer	2	3	3	2	28277	2	3	3	3	3	3	1	4	3	1	1	1	1	1	1	5	#NULL!	3	6	1	0	0	0	0	0	0	0	0	0	0	0	0	0	1	3
1		7	1	#NULL!	#NULL!	#NULL!	#NULL!	#NULL!		2	5	11	2	35146	0	0	0	2	2	2	4	4	4	4	4	4	3	3	3	3	2	1	1	1	0	0	0	0	0	0	0	0	0	0	1	0	0	0	3
1		7	1	#NULL!	#NULL!	#NULL!	#NULL!	#NULL!		2	5	4	2	29526	3	3	4	1	3	4	5	5	5	4	4	5	5	4	5	4	2	3	5	1	0	0	0	0	0	0	0	0	0	0	0	0	0	1	3
1		4	1	#NULL!	#NULL!	#NULL!	#NULL!	#NULL!		2	2	3	2	53219	4	4	4	4	4	4	5	5	5	5	5	5	5	5	5	5	1	1	1	1	0	0	0	0	0	0	0	0	0	0	0	0	0	1	3
4		6	1	#NULL!	#NULL!	#NULL!	#NULL!	#NULL!		2	5	6	2	41076	3	3	3	4	4	4	5	5	5	5	5	5	5	3	2	3	#NULL!	3	5	1	0	0	0	0	0	0	0	0	0	0	0	0	0	1	3
4		7	#NULL!	1	#NULL!	#NULL!	#NULL!	#NULL!		2	5	11	2	30189	0	0	0	4	4	0	3	3	3	4	4	4	4	3	3	3	#NULL!	1	5	1	1	1	1	1	1	1	0	0	0	0	0	0	0	1	3
3		5	1	#NULL!	#NULL!	#NULL!	#NULL!	#NULL!		2	3	3	1	28358	4	4	4	3	4	3	3	1	1	5	5	5	5	4	2	4	#NULL!	1	6	1	0	0	0	0	0	0	0	0	0	0	0	0	0	1	3
3		2	#NULL!	1	#NULL!	#NULL!	#NULL!	#NULL!		2	2	4	1	43229	0	2	1	3	3	3	4	3	3	5	5	5	3	4	3	3	#NULL!	2	6	1	0	0	0	0	0	0	0	0	0	0	0	0	0	1	3
3		6	1	#NULL!	#NULL!	#NULL!	#NULL!	#NULL!		2	3	2	1	64506	4	4	4	4	4	4	1	5	1	1	1	1	1	5	1	5	2	3	6	1	1	1	1	1	1	1	0	0	0	0	0	0	0	1	3
3		5	#NULL!	#NULL!	#NULL!	1	#NULL!	#NULL!		2	5	6	1	91605	3	3	3	4	3	2	4	4	4	5	5	4	5	4	3	3	2	1	6	1	0	0	0	0	0	0	0	0	0	0	0	0	0	1	3
3		5	1	1	1	#NULL!	#NULL!	1	middle eastern	2	5	4	1	90027	3	3	3	3	2	3	2	1	1	4	5	5	5	1	1	1	2	3	5	1	1	1	0	0	1	0	0	0	0	0	1	0	0	0	3
3		4	1	#NULL!	#NULL!	#NULL!	#NULL!	#NULL!		2	5	11	2	35244	2	4	2	4	2	4	3	4	3	5	5	5	5	4	4	4	2	3	5	1	0	0	0	0	0	0	0	0	0	0	0	0	0	1	3
3		2	1	#NULL!	#NULL!	#NULL!	#NULL!	#NULL!		2	2	9	1	37129	3	3	1	4	4	4	3	2	2	4	4	4	3	2	2	2	#NULL!	2	6	1	0	0	0	0	0	0	0	0	0	0	0	0	0	1	3
2		3	#NULL!	#NULL!	#NULL!	#NULL!	#NULL!	1	Hispanic	1	2	1	1	81003	0	1	2	2	3	3	1	1	1	4	4	5	1	4	2	2	#NULL!	4	6	1	0	0	0	0	0	0	0	0	0	0	0	0	0	1	3
2		7	#NULL!	#NULL!	#NULL!	#NULL!	#NULL!	1	Mixed	2	2	12	2	07003	2	2	2	2	2	2	3	3	3	3	3	3	4	3	3	4	2	1	6	1	0	0	0	0	0	0	0	0	0	0	0	0	0	1	3
2		4	#NULL!	#NULL!	#NULL!	#NULL!	#NULL!	1	Hispanic	1	2	11	2	78415	3	4	4	4	4	4	5	5	5	5	5	5	5	1	1	1	#NULL!	2	6	0	1	0	0	0	0	0	0	0	0	0	0	0	0	1	3
2		4	#NULL!	#NULL!	#NULL!	1	#NULL!	#NULL!		2	5	4	2	41042	2	2	2	2	2	1	3	4	3	4	4	4	4	3	3	3	#NULL!	2	6	1	0	0	0	0	0	0	0	0	0	0	0	0	0	1	3
2		6	1	#NULL!	#NULL!	#NULL!	#NULL!	#NULL!		2	3	4	1	20007	4	4	2	4	3	3	1	1	1	5	5	5	3	1	1	1	2	3	5	1	0	0	0	0	0	0	0	0	0	0	1	0	0	0	3
2		2	1	#NULL!	#NULL!	#NULL!	#NULL!	#NULL!		2	3	6	1	25701	0	1	0	4	4	0	5	5	4	5	4	5	4	3	3	3	#NULL!	1	5	0	1	0	1	0	1	1	0	0	0	0	0	0	0	1	3
2		3	1	#NULL!	#NULL!	#NULL!	#NULL!	#NULL!		2	2	2	1	89145	1	3	2	3	3	2	2	2	2	3	4	4	4	3	3	4	2	1	6	1	0	0	0	0	0	0	0	0	0	0	0	0	0	1	3
2		2	1	#NULL!	#NULL!	#NULL!	#NULL!	#NULL!		2	2	3	1	64801	1	0	0	2	3	0	5	3	4	5	4	5	5	5	5	5	#NULL!	1	6	1	0	0	0	0	0	0	0	0	0	0	0	0	0	1	3
2		5	#NULL!	1	#NULL!	#NULL!	#NULL!	#NULL!		2	3	4	1	45229	4	4	4	4	3	4	4	4	3	4	4	4	4	5	5	4	#NULL!	1	5	1	0	1	0	1	1	1	0	0	0	0	0	0	0	1	3
2		5	#NULL!	1	#NULL!	#NULL!	#NULL!	#NULL!		2	3	6	2	28214	0	1	0	2	2	2	1	2	2	4	4	4	4	4	5	4	#NULL!	4	6	1	0	0	0	0	0	0	0	0	0	0	0	0	0	1	3
2		3	1	#NULL!	#NULL!	#NULL!	#NULL!	#NULL!		2	5	4	1	02184	0	3	0	3	3	1	2	2	2	5	5	5	5	5	2	3	#NULL!	3	4	1	0	0	0	0	1	0	0	0	0	0	1	0	1	0	3
2		7	1	#NULL!	#NULL!	#NULL!	#NULL!	#NULL!		2	3	2	2	43055	3	3	3	3	3	3	4	4	4	4	4	4	4	4	3	3	#NULL!	3	5	1	0	0	0	0	0	0	0	0	0	0	0	0	0	1	3
2		4	1	#NULL!	#NULL!	#NULL!	#NULL!	#NULL!		1	3	4	1	87105	0	1	0	0	0	0	5	5	3	5	5	5	5	5	5	5	1	1	5	1	0	1	1	0	0	1	0	0	0	0	0	0	0	1	3
2		4	1	#NULL!	#NULL!	#NULL!	#NULL!	#NULL!		2	4	3	2	34231	2	3	3	3	3	2	5	4	4	4	4	5	4	4	4	4	2	1	6	1	0	0	0	0	0	0	0	0	0	0	0	0	0	1	3
2		4	1	#NULL!	#NULL!	#NULL!	#NULL!	#NULL!		2	5	3	2	72143	1	1	0	2	2	1	5	3	3	4	4	4	3	3	3	3	#NULL!	1	6	1	0	0	0	0	0	0	0	0	0	0	0	0	0	1	3
2		4	1	#NULL!	#NULL!	#NULL!	#NULL!	#NULL!		1	3	4	1	48912	3	3	2	4	3	1	4	4	3	5	5	5	4	3	3	4	2	3	5	1	0	0	0	0	0	0	0	1	0	0	0	0	0	0	3
2		5	1	#NULL!	#NULL!	#NULL!	#NULL!	#NULL!		1	3	7	1	11220	4	3	2	4	4	3	4	4	4	5	5	5	5	1	1	3	#NULL!	1	5	1	0	0	0	0	0	0	0	0	0	0	0	0	0	1	3
2		4	#NULL!	1	#NULL!	#NULL!	#NULL!	#NULL!		2	5	8	1	21213	3	3	2	4	4	3	2	3	4	4	4	4	3	5	4	4	2	3	5	1	1	1	1	1	1	1	0	0	0	0	0	0	0	1	3
2		4	1	#NULL!	#NULL!	#NULL!	#NULL!	#NULL!		2	2	1	1	25302	0	1	0	2	2	4	3	3	3	3	3	3	3	3	3	3	#NULL!	1	2	1	0	0	0	0	0	0	0	0	0	0	0	0	0	1	3
2		5	1	#NULL!	#NULL!	#NULL!	#NULL!	#NULL!		2	5	11	2	66062	1	1	1	4	2	2	5	5	5	5	5	5	5	5	5	5	#NULL!	1	6	1	0	0	0	0	0	0	0	0	0	0	0	0	0	1	3
2		3	1	#NULL!	#NULL!	#NULL!	#NULL!	#NULL!		2	5	3	1	62521	2	3	2	4	4	4	3	3	3	4	5	5	3	3	3	3	2	4	5	0	0	0	1	1	1	0	0	0	0	0	1	0	0	0	3
2		5	1	#NULL!	#NULL!	#NULL!	#NULL!	#NULL!		2	3	3	2	38242	0	3	3	4	0	3	4	4	4	3	4	4	4	4	5	4	1	1	6	1	0	0	0	0	0	0	0	0	0	0	0	0	0	1	3
2		8	1	#NULL!	#NULL!	#NULL!	#NULL!	#NULL!		2	6	8	2	48192	3	4	3	4	3	3	4	4	3	5	5	5	3	4	3	2	#NULL!	2	1	1	0	0	0	0	0	0	0	0	0	0	0	0	0	1	3
2		5	1	#NULL!	#NULL!	#NULL!	#NULL!	#NULL!		2	3	3	1	44135	1	2	0	3	2	0	3	3	3	3	5	4	3	3	3	3	#NULL!	4	6	1	0	0	0	0	0	0	0	0	0	0	1	0	0	0	3
2		4	1	#NULL!	#NULL!	#NULL!	#NULL!	#NULL!		2	5	9	2	33034	0	3	4	4	4	0	3	3	3	5	5	5	3	3	3	3	#NULL!	1	6	1	0	0	0	0	0	0	0	0	0	0	0	0	0	1	3
2		4	1	#NULL!	#NULL!	#NULL!	#NULL!	#NULL!		2	5	11	2	77429	2	2	3	4	3	3	1	4	4	1	2	2	2	4	3	5	2	3	5	0	1	0	0	0	1	0	0	0	0	0	0	0	0	1	3
2		3	1	#NULL!	#NULL!	#NULL!	#NULL!	#NULL!		2	4	6	1	77707	0	0	0	0	0	0	1	3	3	4	4	4	4	5	3	5	#NULL!	1	6	1	0	0	0	0	0	0	0	0	0	0	0	0	0	1	3
2		4	1	#NULL!	#NULL!	#NULL!	#NULL!	#NULL!		2	3	11	2	47630	0	4	1	4	2	2	3	3	3	5	5	5	3	3	3	3	2	3	5	1	0	0	0	0	0	0	0	0	0	0	0	0	0	1	3
2		5	1	#NULL!	#NULL!	#NULL!	#NULL!	#NULL!		2	6	2	1	25702	4	4	4	4	4	4	1	1	1	1	5	1	1	1	1	1	2	3	5	1	0	0	0	0	0	0	0	0	0	0	1	0	0	0	3
2		4	1	#NULL!	#NULL!	#NULL!	#NULL!	#NULL!		2	6	5	1	28546	4	4	2	4	4	4	3	4	4	4	4	4	3	3	2	3	2	3	6	1	0	0	0	0	0	0	0	0	0	0	0	0	0	1	3
2		2	#NULL!	1	#NULL!	#NULL!	#NULL!	#NULL!		2	1	1	2	29118	4	2	4	4	4	4	1	3	1	1	1	1	1	5	5	5	2	1	3	1	0	0	0	1	1	1	0	0	1	0	0	0	0	0	3
2		5	1	#NULL!	#NULL!	#NULL!	#NULL!	#NULL!		2	3	6	2	15044	4	3	2	4	4	4	3	3	3	4	4	4	3	3	3	3	2	2	5	1	0	0	0	0	0	0	0	0	0	0	0	0	0	1	3
2		4	1	#NULL!	#NULL!	#NULL!	#NULL!	#NULL!		1	4	7	1	32806	4	4	4	4	4	4	5	5	5	5	5	5	5	5	5	5	2	3	5	1	1	1	1	1	1	1	0	1	1	1	1	0	1	0	3
2		4	1	#NULL!	1	#NULL!	#NULL!	#NULL!		2	3	4	1	46218	4	4	4	4	4	4	4	4	3	4	4	4	4	1	1	1	#NULL!	3	6	1	1	1	1	1	1	0	0	0	0	0	1	0	0	0	3
2		6	1	#NULL!	#NULL!	#NULL!	#NULL!	#NULL!		1	2	8	1	91730	0	0	0	2	2	2	4	4	2	4	4	4	4	4	4	4	1	1	5	1	0	0	0	0	0	0	0	0	0	0	0	0	0	1	3
2		5	1	#NULL!	#NULL!	#NULL!	#NULL!	#NULL!		2	1	1	2	37854	0	0	0	4	0	0	5	5	5	5	5	5	5	5	3	3	#NULL!	1	6	1	0	0	0	0	0	0	0	0	0	0	0	0	0	1	3
2		8	1	#NULL!	#NULL!	#NULL!	#NULL!	#NULL!		2	2	6	2	71105	3	3	3	4	3	3	4	4	3	5	5	5	3	4	4	3	#NULL!	3	6	1	0	0	0	0	0	0	0	0	0	0	0	0	0	1	3
2		7	1	#NULL!	#NULL!	#NULL!	#NULL!	#NULL!		2	4	4	2	40223	2	2	1	4	4	4	3	4	3	5	5	5	3	3	3	3	#NULL!	1	6	1	0	0	0	0	0	0	0	0	0	0	0	0	0	1	3
2		4	1	#NULL!	#NULL!	#NULL!	#NULL!	#NULL!		2	3	4	1	85711	2	1	1	3	2	2	3	3	3	4	5	5	4	3	3	4	#NULL!	1	1	1	0	0	0	0	0	0	0	0	1	1	1	0	1	0	3
2		5	#NULL!	#NULL!	1	#NULL!	#NULL!	#NULL!		2	5	3	2	91302	3	3	3	4	4	4	5	5	3	5	5	5	5	5	5	3	2	1	6	1	0	0	0	0	0	0	0	0	0	0	0	0	0	1	3
2		7	1	#NULL!	#NULL!	#NULL!	#NULL!	#NULL!		2	2	10	1	75248	3	2	1	4	4	4	5	5	4	5	5	5	5	2	2	2	2	1	5	1	0	0	0	0	0	0	0	0	0	0	0	0	0	1	3
2		8	1	#NULL!	#NULL!	#NULL!	#NULL!	#NULL!		2	2	4	1	92117	3	3	3	4	3	4	3	3	3	4	4	4	3	3	3	3	#NULL!	1	6	1	0	0	0	0	0	0	0	0	0	0	0	0	0	1	3
2		5	#NULL!	1	#NULL!	#NULL!	#NULL!	#NULL!		2	3	3	2	19720	2	2	0	0	0	0	3	4	3	3	4	4	4	4	2	3	#NULL!	1	2	1	0	0	0	0	0	0	0	0	0	0	0	0	0	1	3
2		6	1	#NULL!	#NULL!	#NULL!	#NULL!	#NULL!		2	2	6	1	92648	4	4	4	4	4	4	5	4	4	5	4	4	4	5	4	4	1	4	5	1	0	1	0	1	1	1	0	0	0	0	0	0	0	1	3
2		6	1	#NULL!	#NULL!	#NULL!	#NULL!	#NULL!		2	5	7	2	08865	1	2	1	3	3	2	5	5	5	5	5	5	5	3	3	3	2	3	6	1	0	0	0	0	0	0	0	0	0	0	1	0	0	0	3
2		3	1	#NULL!	#NULL!	#NULL!	#NULL!	#NULL!		2	6	4	1	80206	1	1	0	4	3	1	2	2	2	4	5	5	4	4	3	3	2	3	1	1	0	1	1	1	1	1	0	0	0	0	0	0	0	1	3
2		6	#NULL!	#NULL!	#NULL!	1	#NULL!	#NULL!		2	2	3	2	98118	1	0	0	0	0	0	1	3	1	1	1	1	1	2	3	3	1	1	6	1	0	0	0	0	0	0	0	0	1	1	0	0	0	0	3
2		4	1	#NULL!	#NULL!	#NULL!	#NULL!	#NULL!		2	5	6	1	45505	2	3	2	4	4	3	4	4	4	4	4	4	3	3	3	3	2	3	1	1	0	0	0	0	0	0	0	0	0	0	0	0	0	1	3
2		4	1	#NULL!	#NULL!	#NULL!	#NULL!	#NULL!		2	3	3	2	44703	3	2	1	3	3	3	5	5	5	5	5	5	5	4	1	1	#NULL!	3	6	1	0	0	0	0	0	0	0	0	0	0	0	0	0	1	3
2		6	1	#NULL!	#NULL!	#NULL!	#NULL!	#NULL!		2	4	5	2	42262	3	3	1	4	1	3	4	4	4	5	4	5	5	3	3	3	2	1	5	1	0	0	0	0	0	0	0	0	0	0	0	0	0	1	3
2		4	1	#NULL!	#NULL!	#NULL!	#NULL!	#NULL!		2	3	6	2	33880	4	4	4	4	4	4	5	3	3	3	5	5	3	1	1	1	2	1	6	1	0	0	0	0	0	0	0	0	0	0	0	0	0	1	3
2		2	1	#NULL!	#NULL!	#NULL!	#NULL!	#NULL!		2	4	2	2	84065	3	3	3	3	3	3	2	2	2	5	5	5	4	4	2	4	#NULL!	2	5	1	0	0	0	0	0	0	0	0	0	0	1	0	0	0	3
2		7	#NULL!	1	#NULL!	#NULL!	#NULL!	#NULL!		2	5	11	1	10469	0	2	0	4	0	4	3	3	3	5	5	5	3	3	3	3	#NULL!	1	6	0	0	1	0	0	1	0	0	1	0	0	0	0	0	0	3
2		5	1	#NULL!	#NULL!	#NULL!	#NULL!	#NULL!		1	5	5	1	33613	3	3	3	4	4	4	5	5	5	4	4	4	3	5	5	4	1	1	6	1	0	0	0	0	0	0	0	0	0	0	0	0	0	1	3
2		4	1	#NULL!	#NULL!	#NULL!	#NULL!	#NULL!		2	5	6	2	35405	2	3	3	4	4	3	3	3	3	5	5	5	5	3	3	3	1	2	1	1	0	0	0	0	0	0	0	0	0	0	1	0	0	0	3
2		4	1	#NULL!	#NULL!	#NULL!	#NULL!	#NULL!		2	3	6	2	85142	1	3	3	3	2	2	5	5	3	5	5	5	3	4	3	3	2	3	6	1	1	1	1	1	1	1	0	0	0	0	0	0	0	1	3
2		7	1	#NULL!	#NULL!	#NULL!	#NULL!	#NULL!		2	5	7	1	98109	4	4	4	4	2	4	5	5	5	5	5	5	5	3	3	4	2	1	4	0	0	0	0	1	1	0	0	0	0	0	1	0	0	0	3
2		2	1	#NULL!	#NULL!	#NULL!	#NULL!	#NULL!		2	1	3	2	49855	1	2	1	3	2	1	5	5	4	5	5	5	4	5	5	5	2	1	6	1	0	1	1	1	1	1	0	0	0	0	0	0	0	1	3
2		5	1	#NULL!	#NULL!	#NULL!	#NULL!	#NULL!		2	5	8	2	22181	0	0	0	2	2	2	4	4	2	4	4	4	2	2	2	2	2	1	5	1	0	0	0	0	0	0	0	0	0	0	0	0	0	1	3
2		6	1	#NULL!	#NULL!	#NULL!	#NULL!	#NULL!		2	2	2	1	32955	0	1	0	1	0	1	1	5	1	1	1	1	1	5	5	5	#NULL!	4	6	1	0	0	0	0	0	0	0	0	0	0	0	0	0	1	3
2		7	1	#NULL!	#NULL!	#NULL!	#NULL!	#NULL!		2	3	4	2	98338	2	3	3	4	4	4	5	5	5	5	5	5	5	1	1	1	#NULL!	1	5	1	1	1	1	1	1	1	0	0	0	0	0	0	0	1	3
2		6	1	#NULL!	#NULL!	#NULL!	#NULL!	#NULL!		2	5	12	1	37919	3	3	3	4	4	4	5	5	5	5	5	5	5	5	5	5	2	3	5	1	1	1	1	0	1	1	0	0	0	0	0	0	0	1	3
2		4	1	#NULL!	#NULL!	1	#NULL!	#NULL!		2	5	7	2	91350	4	4	3	4	3	3	1	4	4	5	5	5	4	5	1	1	#NULL!	1	2	1	0	0	0	0	0	0	0	0	0	0	0	0	0	1	3
2		6	1	#NULL!	#NULL!	#NULL!	#NULL!	#NULL!		2	2	3	2	76640	4	4	4	4	4	4	5	2	2	5	5	5	5	1	5	1	#NULL!	3	5	1	0	0	0	0	0	0	0	0	0	0	0	0	0	1	3
2		6	1	#NULL!	#NULL!	#NULL!	#NULL!	#NULL!		2	4	5	1	98502	4	4	4	4	2	0	5	4	5	5	5	5	5	4	4	1	2	1	6	1	1	1	0	1	1	0	0	0	0	0	0	0	0	1	3
2		7	1	#NULL!	#NULL!	#NULL!	#NULL!	#NULL!		2	4	4	2	32277	3	4	2	4	4	4	3	3	3	4	5	5	3	2	2	3	2	3	5	1	0	0	0	0	0	0	0	1	0	0	1	0	0	0	3
2		7	1	#NULL!	#NULL!	#NULL!	#NULL!	#NULL!		2	2	7	2	15045	0	1	1	4	4	4	4	3	3	4	4	4	4	3	3	3	#NULL!	1	6	1	0	0	0	0	0	0	0	0	0	0	0	0	0	1	3
2		7	1	#NULL!	#NULL!	#NULL!	#NULL!	#NULL!		2	3	1	2	99203	2	3	3	3	3	3	4	4	3	5	5	5	5	3	3	3	#NULL!	3	4	1	0	1	1	1	1	1	0	0	0	0	0	0	0	1	3
2		7	1	#NULL!	#NULL!	#NULL!	#NULL!	#NULL!		2	3	9	2	60089	0	3	0	4	3	4	5	5	3	5	5	5	5	2	3	2	#NULL!	1	1	1	0	0	0	0	0	0	0	0	0	0	0	0	0	1	3
2		7	1	#NULL!	#NULL!	#NULL!	#NULL!	#NULL!		2	5	6	2	54937	4	4	3	3	2	3	5	5	5	5	5	5	4	5	5	5	#NULL!	4	2	1	0	0	0	0	0	0	0	0	0	0	0	0	0	1	3
2		3	1	#NULL!	#NULL!	#NULL!	1	#NULL!		2	3	5	1	27705	2	2	2	4	4	2	4	4	4	1	1	1	1	4	4	4	1	4	5	1	0	0	0	0	0	0	0	0	0	0	0	0	0	1	3
2		6	1	#NULL!	#NULL!	#NULL!	#NULL!	#NULL!		2	2	4	2	30188	3	3	2	4	4	4	5	5	5	5	5	5	5	4	3	3	#NULL!	2	5	1	1	1	1	1	1	0	0	0	0	0	0	0	0	1	3
2		6	1	#NULL!	#NULL!	#NULL!	#NULL!	#NULL!		2	6	7	2	29926	3	4	4	4	4	4	4	4	4	4	5	5	3	1	1	1	1	4	5	1	0	0	0	0	0	0	0	0	0	0	0	0	0	1	3
2		6	1	#NULL!	#NULL!	#NULL!	#NULL!	#NULL!		2	2	4	2	07644	2	2	2	3	3	3	4	4	3	4	4	4	4	3	3	3	#NULL!	4	6	1	0	1	1	1	1	1	0	0	0	0	0	0	0	1	3
2		7	1	#NULL!	#NULL!	#NULL!	#NULL!	#NULL!		2	5	10	2	34201	3	3	3	4	3	3	4	4	4	5	5	5	4	4	4	4	#NULL!	1	6	1	0	0	0	0	0	0	0	0	0	0	0	0	0	1	3
2		2	1	#NULL!	#NULL!	#NULL!	#NULL!	#NULL!		2	3	8	2	40514	3	3	2	3	3	3	5	5	5	5	5	5	5	5	5	5	2	5	5	1	0	0	0	0	0	0	0	0	0	0	0	0	0	1	3
2		6	1	1	1	#NULL!	#NULL!	#NULL!		1	2	5	2	89115	2	4	4	3	3	2	1	1	3	5	5	5	5	5	5	5	2	3	5	1	0	1	1	1	1	1	0	0	0	0	0	0	0	1	3
2		7	1	#NULL!	#NULL!	#NULL!	#NULL!	#NULL!		2	7	2	2	02176	4	4	4	4	4	4	5	4	4	5	5	5	3	3	3	3	2	3	6	0	1	1	0	1	1	0	0	0	0	0	1	0	1	0	3
2		7	1	#NULL!	#NULL!	#NULL!	#NULL!	#NULL!		2	6	8	2	30033	4	4	4	4	4	4	5	5	5	5	5	5	5	5	5	3	2	1	6	1	0	0	0	0	0	0	0	0	0	0	0	0	0	1	3
2		6	1	#NULL!	#NULL!	#NULL!	#NULL!	#NULL!		2	3	8	2	52804	2	2	3	4	2	3	4	4	3	5	5	5	3	3	3	4	#NULL!	1	5	1	0	0	1	1	1	0	0	0	0	0	0	0	0	1	3
2		2	1	#NULL!	#NULL!	#NULL!	#NULL!	#NULL!		2	2	3	2	98375	1	2	1	3	3	1	4	4	4	4	4	4	3	3	3	3	#NULL!	1	6	0	0	1	1	0	1	0	0	0	1	0	1	0	0	0	3
2		7	1	#NULL!	#NULL!	#NULL!	#NULL!	#NULL!		2	3	5	2	63376	0	2	0	4	4	0	5	5	5	5	5	5	5	3	3	5	#NULL!	3	6	1	0	0	0	0	0	0	0	0	0	0	0	0	0	1	3
2		7	1	#NULL!	#NULL!	#NULL!	#NULL!	#NULL!		2	6	11	1	98465	4	4	4	4	4	4	4	3	3	4	5	5	3	2	2	2	2	3	5	1	1	1	0	0	0	0	0	0	0	0	1	0	0	0	3
2		7	1	#NULL!	#NULL!	#NULL!	#NULL!	#NULL!		2	6	3	2	75081	3	4	1	4	2	3	3	3	3	5	5	5	3	2	2	3	2	3	2	0	1	0	0	0	0	0	0	0	0	0	0	0	0	1	3
2		3	1	#NULL!	#NULL!	#NULL!	#NULL!	#NULL!		2	3	12	2	19508	0	0	0	2	1	1	3	3	3	5	3	4	3	3	3	3	#NULL!	4	6	1	0	0	0	0	0	0	0	0	0	0	0	0	0	1	3
2		7	1	#NULL!	#NULL!	#NULL!	#NULL!	#NULL!		2	5	4	2	92127	1	4	4	3	3	3	4	4	4	5	5	5	5	3	3	3	2	3	4	1	0	0	0	0	0	0	0	1	1	1	0	0	0	0	3
2		8	1	#NULL!	#NULL!	#NULL!	#NULL!	#NULL!		2	3	3	2	27609	2	4	4	4	4	4	5	5	3	5	5	5	4	3	2	1	2	1	6	0	0	1	0	0	1	0	0	0	0	0	0	0	0	1	3
2		4	#NULL!	1	#NULL!	#NULL!	#NULL!	#NULL!		2	5	11	2	23836	3	2	2	3	3	3	3	3	3	5	5	5	5	3	3	3	#NULL!	1	5	1	1	0	0	0	0	0	0	0	0	0	0	1	0	0	3
2		7	1	#NULL!	#NULL!	#NULL!	#NULL!	#NULL!		2	2	2	2	97015	0	2	0	4	3	3	3	5	3	5	5	5	5	4	4	5	#NULL!	1	5	1	0	0	0	0	0	0	0	0	0	0	1	1	0	0	3
2		7	1	#NULL!	#NULL!	#NULL!	#NULL!	#NULL!		2	6	11	2	12065	4	4	4	3	3	3	5	5	4	5	5	5	5	3	3	1	1	1	5	0	0	1	0	0	0	0	0	0	0	0	0	0	0	1	3
2		6	#NULL!	1	1	#NULL!	#NULL!	#NULL!		2	3	6	1	28079	2	0	0	4	4	4	4	4	2	3	3	3	3	3	3	3	1	1	6	1	0	0	1	1	1	0	0	0	0	0	1	0	0	0	3
2		7	1	#NULL!	#NULL!	#NULL!	#NULL!	#NULL!		2	6	6	2	33321	0	4	4	4	4	4	1	3	3	1	1	1	1	3	3	3	#NULL!	3	5	1	0	0	0	0	0	0	0	0	0	0	0	0	0	1	3
2		6	1	#NULL!	#NULL!	#NULL!	#NULL!	#NULL!		2	5	10	2	64055	3	4	3	4	4	4	3	3	2	5	5	5	3	3	3	3	2	2	5	0	1	0	1	0	1	0	0	0	0	0	0	0	0	1	3
2		4	#NULL!	#NULL!	#NULL!	#NULL!	#NULL!	1	Latinx	1	3	8	1	98402	0	2	1	4	4	3	3	3	3	4	5	4	3	3	3	3	#NULL!	1	6	1	0	0	0	0	0	0	0	0	0	0	0	0	0	1	3
2		6	1	#NULL!	#NULL!	#NULL!	#NULL!	#NULL!		2	3	11	2	39525	2	4	4	4	4	0	5	5	5	5	5	5	5	1	1	1	#NULL!	1	5	1	0	0	0	0	0	0	0	0	0	0	0	0	0	1	3
2		6	1	#NULL!	#NULL!	#NULL!	#NULL!	#NULL!		2	2	11	2	77584	3	4	4	4	3	3	5	5	3	5	5	5	4	2	1	1	#NULL!	1	6	1	0	0	0	0	0	0	0	0	1	1	0	0	0	0	3
2		7	1	#NULL!	#NULL!	#NULL!	#NULL!	#NULL!		2	2	4	2	01821	0	0	0	3	2	0	4	4	3	2	5	5	2	2	2	2	#NULL!	1	3	1	0	1	1	0	1	1	0	0	0	0	0	0	0	1	3
2		6	1	#NULL!	#NULL!	#NULL!	#NULL!	#NULL!		2	3	5	2	02895	2	2	2	4	4	4	4	4	4	4	4	4	4	4	2	2	#NULL!	4	5	1	0	0	0	0	0	0	0	0	0	0	0	0	0	1	3
2		5	1	#NULL!	#NULL!	#NULL!	#NULL!	#NULL!		2	4	6	2	58504	2	3	2	4	4	3	3	3	2	4	5	5	2	4	4	4	1	4	6	1	0	0	0	0	0	0	0	1	0	0	0	0	0	0	3
2		5	1	#NULL!	#NULL!	#NULL!	#NULL!	#NULL!		2	4	1	2	48602	4	4	4	4	4	4	3	3	3	5	5	5	3	3	3	3	2	3	5	1	1	1	1	1	1	1	0	0	0	0	0	0	0	1	3
2		7	1	#NULL!	#NULL!	#NULL!	#NULL!	#NULL!		2	2	8	2	01862	0	4	4	4	4	4	2	2	2	5	5	5	1	1	1	1	2	3	5	1	0	0	0	0	0	0	0	0	0	0	0	0	0	1	3
2		5	#NULL!	1	#NULL!	#NULL!	#NULL!	#NULL!		2	3	1	2	08312	4	4	4	4	4	4	5	5	4	5	5	5	5	5	3	1	2	1	6	1	0	0	0	0	0	0	0	0	0	0	0	0	0	1	3
2		7	1	#NULL!	#NULL!	#NULL!	#NULL!	#NULL!		2	3	7	2	30252	1	1	0	4	4	3	3	4	4	4	4	4	3	4	4	4	#NULL!	1	5	1	0	0	0	0	0	0	0	0	0	0	0	0	0	1	3
2		7	1	#NULL!	#NULL!	#NULL!	#NULL!	#NULL!		2	3	7	2	80104	0	0	0	4	4	4	5	5	5	5	5	5	5	3	4	1	#NULL!	2	5	1	0	0	0	0	0	0	0	0	0	0	0	0	0	1	3
2		7	1	#NULL!	#NULL!	#NULL!	#NULL!	#NULL!		2	2	6	2	19975	1	2	1	3	3	1	5	5	5	5	5	5	5	2	2	2	#NULL!	1	3	1	0	0	0	0	0	0	0	0	0	0	0	0	0	1	3
2		6	1	#NULL!	#NULL!	#NULL!	#NULL!	#NULL!		2	5	4	2	07734	3	4	4	4	4	4	5	5	5	5	5	5	5	5	4	4	2	3	5	1	0	0	0	0	0	0	0	0	0	0	0	0	0	1	3
2		7	#NULL!	1	#NULL!	#NULL!	#NULL!	#NULL!		2	2	2	1	38748	0	4	0	3	0	0	5	5	5	5	5	5	5	5	5	5	#NULL!	3	5	1	0	0	0	0	0	0	0	0	0	0	0	0	0	1	3
2		6	1	#NULL!	#NULL!	#NULL!	#NULL!	#NULL!		2	4	10	2	21222	2	2	2	4	3	3	3	3	3	5	5	5	4	2	2	2	2	1	5	1	1	1	1	1	1	0	0	0	0	0	0	0	0	1	3
2		6	1	#NULL!	#NULL!	#NULL!	#NULL!	#NULL!		2	3	6	1	75063	2	4	4	4	4	4	5	5	5	5	4	5	5	5	5	5	1	1	6	1	1	1	1	1	1	1	0	1	0	0	0	0	0	0	3
2		3	1	#NULL!	#NULL!	#NULL!	#NULL!	#NULL!		2	4	3	2	34990	2	3	1	2	3	4	4	4	4	5	5	5	3	5	5	5	2	3	6	1	0	0	0	0	0	0	0	0	0	0	0	0	0	1	3
2		6	1	#NULL!	#NULL!	#NULL!	#NULL!	#NULL!		2	4	7	1	10002	3	3	2	4	3	2	5	5	3	5	5	5	3	1	1	1	2	1	5	1	0	0	0	1	1	0	0	0	0	0	0	0	0	1	3
2		6	1	#NULL!	#NULL!	#NULL!	#NULL!	#NULL!		2	4	5	2	10704	1	1	1	4	4	3	3	3	3	3	4	5	3	3	2	2	2	3	2	1	1	1	0	0	0	0	0	0	0	0	1	0	0	0	3
2		2	1	#NULL!	#NULL!	#NULL!	#NULL!	#NULL!		2	1	2	1	90046	2	3	2	2	2	1	2	1	1	5	5	5	4	3	2	1	2	1	6	1	0	0	1	1	1	1	0	0	0	0	0	0	0	1	3
2		3	1	#NULL!	#NULL!	#NULL!	#NULL!	#NULL!		2	2	5	2	84020	1	1	1	2	1	1	1	1	1	1	4	3	1	1	1	1	2	1	2	0	1	1	1	0	1	1	0	0	0	0	0	0	0	1	3
2		6	1	#NULL!	#NULL!	#NULL!	#NULL!	#NULL!		2	3	1	2	18052	1	1	1	4	4	2	5	5	5	5	5	5	5	5	5	5	#NULL!	3	6	1	0	0	0	0	0	0	0	0	0	0	0	0	0	1	3
2		4	#NULL!	1	#NULL!	#NULL!	#NULL!	#NULL!		2	2	1	2	90047	0	0	0	4	4	2	5	5	5	4	5	5	5	3	3	3	1	1	6	0	1	1	0	0	1	1	0	0	0	0	0	0	0	1	3
2		2	1	#NULL!	#NULL!	#NULL!	#NULL!	#NULL!		2	1	11	2	19365	1	1	0	4	1	0	2	1	3	5	5	5	2	4	4	4	#NULL!	3	5	1	0	0	0	1	1	0	0	0	0	0	1	0	1	0	3
2		9	1	#NULL!	#NULL!	#NULL!	#NULL!	#NULL!		2	4	4	2	60540	2	3	2	2	3	2	5	5	5	5	5	5	4	3	3	3	#NULL!	4	6	1	0	0	0	0	0	0	0	0	0	0	0	0	0	1	3
2		7	1	#NULL!	#NULL!	#NULL!	#NULL!	#NULL!		2	2	6	1	53209	0	0	0	3	1	0	5	5	5	5	5	5	5	5	5	5	#NULL!	3	5	1	1	1	1	1	1	1	0	0	0	0	0	0	0	1	3
2		8	1	#NULL!	#NULL!	#NULL!	#NULL!	#NULL!		2	3	8	1	73703	4	4	4	4	4	4	5	5	5	5	5	5	5	5	5	5	2	3	4	1	0	0	0	0	0	0	0	0	0	0	0	0	0	1	3
2		5	1	#NULL!	#NULL!	#NULL!	#NULL!	#NULL!		2	5	8	2	68434	1	1	0	3	3	2	5	3	3	5	4	5	3	2	2	2	#NULL!	1	6	1	0	0	0	0	0	0	0	0	0	0	1	0	0	0	3
2		7	1	#NULL!	#NULL!	#NULL!	#NULL!	#NULL!		2	3	2	2	32726	4	4	4	4	4	4	5	3	3	5	5	5	3	2	2	1	2	3	5	1	0	0	0	0	0	0	0	0	0	0	1	0	0	0	3
2		4	1	#NULL!	#NULL!	#NULL!	#NULL!	1		2	3	5	2	32804	3	3	3	4	3	3	4	5	4	5	5	5	4	3	3	3	#NULL!	1	5	1	0	0	0	0	0	0	0	0	0	0	1	0	0	0	3
2		4	1	#NULL!	#NULL!	#NULL!	#NULL!	#NULL!		2	5	8	2	16803	0	0	0	1	1	0	4	4	4	5	5	5	4	3	3	3	#NULL!	4	4	0	1	0	0	0	0	0	0	0	0	0	0	0	0	1	3
2		7	1	#NULL!	#NULL!	#NULL!	#NULL!	#NULL!		2	6	11	1	30307	2	3	2	3	2	3	3	5	3	4	5	5	3	4	4	4	2	3	5	1	1	1	0	1	1	0	0	0	0	0	1	0	0	0	3
2		7	1	#NULL!	#NULL!	#NULL!	#NULL!	#NULL!		2	6	9	2	49509	3	4	2	4	3	3	3	3	3	4	5	5	3	3	3	3	2	3	6	1	1	0	0	0	0	0	0	0	0	0	0	0	0	1	3
2		2	#NULL!	1	#NULL!	#NULL!	#NULL!	#NULL!		2	2	3	2	33617	4	3	4	4	3	4	4	4	4	1	4	1	1	3	4	4	#NULL!	1	2	1	1	1	1	1	1	1	0	0	0	0	0	0	0	1	3
2		3	1	#NULL!	#NULL!	#NULL!	#NULL!	#NULL!		2	5	3	2	37217	3	3	3	2	2	2	3	4	3	4	4	4	3	3	3	4	2	3	5	0	1	1	1	1	1	0	0	0	0	0	0	0	1	0	3
2		7	1	#NULL!	#NULL!	#NULL!	#NULL!	#NULL!		2	6	8	1	07023	0	0	0	0	0	0	1	1	1	1	1	1	1	1	1	1	#NULL!	1	6	1	0	0	0	0	0	0	0	0	0	0	0	0	0	1	3
2		5	1	#NULL!	#NULL!	#NULL!	#NULL!	#NULL!		2	2	6	2	55014	2	3	2	4	2	3	4	3	2	5	5	5	4	5	4	4	2	3	5	1	0	0	0	0	0	0	0	0	0	0	1	0	1	0	3
2		7	1	#NULL!	#NULL!	#NULL!	#NULL!	#NULL!		2	3	4	2	70817	3	3	3	4	4	2	5	1	3	5	5	5	3	3	3	3	2	2	5	1	0	0	0	0	0	0	0	0	0	0	0	0	0	1	3
2		8	1	#NULL!	#NULL!	#NULL!	#NULL!	#NULL!		2	5	4	1	79424	3	3	3	4	3	3	5	5	5	5	5	5	5	2	2	1	#NULL!	1	3	1	0	0	0	0	0	0	0	0	0	0	0	0	0	1	3
2		7	1	#NULL!	#NULL!	#NULL!	#NULL!	#NULL!		2	6	7	2	34690	2	3	3	4	4	3	4	4	3	4	5	5	4	2	2	3	#NULL!	3	5	1	0	0	0	0	0	0	0	0	0	0	0	0	0	1	3
2		6	1	#NULL!	#NULL!	#NULL!	#NULL!	#NULL!		2	3	2	2	53086	2	3	3	3	3	2	5	5	5	5	5	5	5	5	5	5	#NULL!	1	6	1	1	1	1	1	1	1	0	0	0	0	0	0	0	1	3
2		6	1	#NULL!	#NULL!	#NULL!	#NULL!	#NULL!		2	6	2	1	80224	4	4	3	4	3	2	3	4	2	4	5	5	2	1	1	4	2	3	6	0	1	1	1	0	0	0	0	0	0	0	1	0	0	0	3
2		6	1	#NULL!	#NULL!	#NULL!	#NULL!	#NULL!		2	2	3	2	83301	1	3	1	3	1	1	5	5	5	5	5	5	5	5	5	3	2	3	5	1	0	0	0	0	0	0	0	0	0	0	0	0	0	1	3
2		8	#NULL!	1	#NULL!	#NULL!	#NULL!	#NULL!		2	7	8	1	94596	4	4	3	4	4	4	1	4	2	5	5	5	5	3	3	3	#NULL!	1	6	1	0	0	0	0	0	0	0	0	0	0	0	0	0	1	3
2		7	1	#NULL!	#NULL!	#NULL!	#NULL!	#NULL!		2	2	7	2	40258	4	4	3	4	3	3	5	5	5	5	5	5	5	3	3	3	2	3	5	1	0	0	0	0	0	0	0	0	0	0	0	0	0	1	3
2		5	1	#NULL!	#NULL!	#NULL!	#NULL!	#NULL!		2	5	8	2	29527	1	4	2	4	4	4	5	5	5	4	4	4	4	4	4	4	2	1	6	1	0	0	0	0	0	0	0	0	0	0	0	0	0	1	3
2		8	1	#NULL!	#NULL!	#NULL!	#NULL!	#NULL!		2	5	11	2	30022	0	0	0	4	4	4	5	5	4	5	5	5	5	2	2	2	#NULL!	3	5	1	0	0	0	0	0	0	0	0	0	0	0	0	0	1	3
2		9	1	#NULL!	#NULL!	#NULL!	#NULL!	#NULL!		2	3	10	2	75025	2	3	3	4	3	4	5	4	3	4	5	5	3	2	2	2	2	3	5	0	0	1	0	0	0	0	0	0	0	0	0	0	0	1	3
2		7	1	#NULL!	#NULL!	#NULL!	#NULL!	#NULL!		2	3	7	2	39501	3	3	2	4	4	3	4	4	3	5	5	5	3	2	2	2	2	3	6	0	0	1	0	0	1	0	0	0	0	0	0	0	0	1	3
2		4	1	#NULL!	#NULL!	#NULL!	#NULL!	#NULL!		2	5	6	2	15601	4	2	0	4	2	1	3	3	3	5	5	5	5	5	5	5	2	3	5	1	1	1	0	0	1	0	0	0	0	0	1	0	0	0	3
2		6	#NULL!	#NULL!	#NULL!	1	#NULL!	#NULL!		2	4	1	2	92083	4	4	4	4	4	4	1	5	1	4	4	5	4	5	5	5	#NULL!	1	6	0	0	1	0	0	0	0	0	0	0	0	0	0	0	1	3
2		7	1	#NULL!	#NULL!	#NULL!	#NULL!	#NULL!		2	3	6	2	60543	3	3	3	3	2	2	4	4	4	4	4	4	4	3	3	3	#NULL!	1	5	1	0	0	0	1	1	0	0	0	0	0	0	0	0	1	3
2		6	1	#NULL!	#NULL!	#NULL!	#NULL!	#NULL!		2	5	8	2	91730	4	4	4	4	4	0	5	4	2	5	5	5	3	2	1	1	2	3	6	1	0	0	0	0	0	0	0	0	0	0	0	0	0	1	3
2		7	1	#NULL!	#NULL!	#NULL!	#NULL!	#NULL!		2	5	5	2	32118	2	4	0	4	4	2	4	1	1	5	5	5	2	1	1	1	2	3	4	0	1	1	1	1	1	1	0	0	0	0	0	0	0	1	3
2		6	1	#NULL!	#NULL!	#NULL!	#NULL!	#NULL!		2	3	7	2	08723	3	4	3	4	4	4	3	4	4	5	5	5	4	5	5	5	#NULL!	1	6	1	0	0	0	0	0	0	0	1	0	0	0	0	0	0	3
2		4	#NULL!	1	#NULL!	#NULL!	#NULL!	#NULL!		2	4	3	1	49224	0	1	2	0	0	0	5	5	5	5	5	5	5	5	5	4	2	3	6	1	1	1	1	1	1	1	0	0	0	0	0	0	0	1	3
2		4	1	#NULL!	#NULL!	#NULL!	#NULL!	#NULL!		2	2	9	2	07724	0	2	0	4	3	3	4	3	3	5	5	5	3	3	3	3	#NULL!	2	2	1	0	0	0	0	0	1	0	0	0	0	0	0	0	1	3
2		7	1	#NULL!	#NULL!	#NULL!	#NULL!	#NULL!		2	3	7	2	33161	0	2	0	3	3	3	4	4	4	4	4	4	4	4	4	4	#NULL!	3	6	1	1	1	1	1	1	1	0	0	0	0	0	0	0	1	3
2		7	1	#NULL!	#NULL!	#NULL!	#NULL!	#NULL!		2	3	8	2	53151	2	3	2	3	2	3	3	2	2	4	4	3	2	2	2	3	#NULL!	1	6	0	1	0	0	0	0	0	0	0	0	0	1	0	1	0	3
2		7	1	#NULL!	#NULL!	#NULL!	#NULL!	#NULL!		2	3	2	2	14626	2	4	1	4	4	4	5	5	5	5	5	5	5	3	3	3	#NULL!	4	6	1	1	1	1	1	1	1	0	0	0	0	0	0	0	1	3
2		7	1	#NULL!	#NULL!	#NULL!	#NULL!	#NULL!		2	5	7	2	03820	2	2	2	3	3	2	4	4	3	5	5	5	5	2	2	2	2	3	6	1	0	0	0	0	0	0	0	0	0	0	0	0	0	1	3
2		6	1	#NULL!	#NULL!	#NULL!	#NULL!	#NULL!		2	5	3	2	30016	2	4	4	4	3	3	3	3	3	5	5	5	3	2	2	2	#NULL!	1	6	1	0	0	0	0	0	0	0	0	0	0	0	0	0	1	3
2		7	1	#NULL!	#NULL!	#NULL!	#NULL!	#NULL!		2	5	3	2	91405	1	3	2	4	3	2	4	4	4	4	4	4	4	2	2	2	#NULL!	2	5	1	0	0	0	0	0	0	0	0	0	0	0	0	0	1	3
2		6	1	#NULL!	#NULL!	#NULL!	#NULL!	#NULL!		2	5	4	2	55991	3	3	4	4	4	4	5	5	5	5	5	5	5	1	1	1	2	3	5	1	0	0	0	0	0	0	0	0	0	0	0	0	0	1	3
2		3	1	#NULL!	1	#NULL!	#NULL!	#NULL!		2	6	7	2	08021	2	2	2	1	1	0	5	5	3	4	5	5	3	3	3	3	#NULL!	1	5	1	0	0	0	0	0	0	0	0	0	0	1	0	0	0	3
2		7	1	#NULL!	#NULL!	#NULL!	#NULL!	#NULL!		2	4	11	2	07424	1	2	1	3	3	3	4	4	4	4	4	4	3	2	2	2	#NULL!	1	2	1	0	0	0	0	0	0	0	0	0	0	1	0	0	0	3
2		6	1	#NULL!	#NULL!	#NULL!	#NULL!	#NULL!		2	6	9	1	60630	3	3	3	4	3	3	4	4	4	4	4	4	3	4	4	4	#NULL!	1	5	1	0	0	0	0	0	0	0	0	0	0	0	0	0	1	3
2		7	1	#NULL!	#NULL!	#NULL!	#NULL!	#NULL!		2	6	12	2	28405	3	4	4	4	4	4	4	4	4	4	4	4	3	3	2	2	#NULL!	3	5	1	0	0	0	0	0	0	0	0	0	0	0	1	0	0	3
2		7	1	#NULL!	#NULL!	#NULL!	#NULL!	#NULL!		2	4	8	2	85050	2	4	4	4	2	4	4	3	3	5	5	5	5	3	3	3	#NULL!	1	6	1	0	0	0	0	0	0	0	0	0	0	0	0	0	1	3
2		6	1	#NULL!	#NULL!	#NULL!	#NULL!	#NULL!		2	3	8	2	75704	3	3	3	4	3	3	5	5	5	5	5	5	4	5	4	5	#NULL!	1	5	1	0	0	0	0	0	0	0	0	0	0	0	0	0	1	3
2		4	1	#NULL!	#NULL!	#NULL!	#NULL!	#NULL!		2	3	3	1	49504	2	2	2	4	4	3	5	5	5	5	5	5	5	5	5	5	#NULL!	1	6	1	1	1	1	1	1	1	0	0	0	0	0	0	0	1	3
2		7	1	#NULL!	#NULL!	#NULL!	#NULL!	#NULL!		2	5	7	2	27545	0	3	0	4	1	1	3	3	3	3	4	4	3	3	3	3	1	1	5	1	0	0	0	0	0	0	0	0	0	0	0	0	0	1	3
2		6	1	#NULL!	#NULL!	#NULL!	#NULL!	#NULL!		2	7	8	2	19067	0	1	1	2	3	3	3	4	4	4	4	4	4	4	3	3	#NULL!	1	6	1	0	0	0	0	0	0	0	0	0	0	0	0	0	1	3
2		3	1	#NULL!	#NULL!	#NULL!	#NULL!	#NULL!		2	6	4	1	87104	1	1	1	2	1	1	4	2	2	4	4	4	4	4	2	3	#NULL!	3	5	1	0	1	1	1	1	1	0	0	0	0	0	0	0	1	3
2		6	1	#NULL!	#NULL!	#NULL!	#NULL!	#NULL!		2	3	5	1	53220	4	4	0	4	4	4	4	4	3	5	5	5	3	1	1	1	2	3	6	1	0	0	0	0	0	0	0	0	0	0	0	0	0	1	3
2		7	1	#NULL!	#NULL!	#NULL!	#NULL!	#NULL!		2	1	2	2	75115	0	0	0	2	2	0	3	3	3	4	4	4	4	4	3	3	#NULL!	4	6	1	0	0	0	0	0	0	0	0	0	0	0	0	0	1	3
2		4	#NULL!	#NULL!	#NULL!	1	#NULL!	#NULL!		2	5	8	1	91902	4	4	4	4	4	4	5	5	5	5	5	5	5	5	5	5	1	1	2	1	1	1	1	1	1	1	0	0	0	0	0	0	0	1	3
2		7	1	#NULL!	#NULL!	#NULL!	#NULL!	#NULL!		2	5	10	2	94565	3	3	2	4	3	2	4	3	3	5	5	5	5	4	4	3	2	3	5	1	0	0	0	0	0	0	0	1	0	0	0	0	0	0	3
2		4	1	#NULL!	#NULL!	#NULL!	#NULL!	#NULL!		2	6	8	1	33966	2	2	0	4	2	2	5	5	5	5	5	5	5	5	5	5	2	1	5	1	1	1	1	1	1	1	0	0	0	0	0	0	0	1	3
2		6	1	#NULL!	#NULL!	#NULL!	#NULL!	#NULL!		2	3	10	2	75007	0	0	0	4	3	3	3	3	3	5	5	5	5	4	4	3	2	3	6	1	1	1	1	1	1	1	0	0	0	0	0	0	0	1	3
2		7	#NULL!	1	#NULL!	#NULL!	#NULL!	#NULL!		2	5	9	2	32548	2	4	1	4	4	4	5	5	5	4	4	5	3	3	3	3	#NULL!	1	6	1	0	0	0	0	0	0	0	0	0	0	0	0	0	1	3
2		8	1	#NULL!	#NULL!	#NULL!	#NULL!	#NULL!		2	2	4	2	32708	2	4	3	4	4	4	4	4	4	5	5	5	5	5	5	5	2	3	5	1	0	0	0	0	0	0	0	0	0	0	0	0	0	1	3
2		8	1	#NULL!	#NULL!	#NULL!	#NULL!	#NULL!		2	2	11	2	97304	3	3	3	3	3	3	4	3	3	5	5	5	3	3	3	3	#NULL!	3	5	1	0	0	0	0	0	0	0	0	0	0	1	0	0	0	3
2		7	1	#NULL!	#NULL!	#NULL!	#NULL!	#NULL!		2	5	1	1	46544	0	1	0	4	3	2	5	5	5	4	5	5	3	3	3	3	#NULL!	3	6	0	1	0	0	0	0	0	0	0	0	0	1	0	0	0	3
2		6	1	#NULL!	#NULL!	#NULL!	#NULL!	#NULL!		2	6	12	2	14127	4	4	4	4	4	4	5	5	5	5	5	5	3	3	3	3	#NULL!	1	5	1	0	0	0	0	0	0	0	0	0	0	0	0	0	1	3
2		7	1	#NULL!	#NULL!	#NULL!	#NULL!	#NULL!		2	3	2	2	65810	1	3	2	4	4	4	3	4	3	5	5	5	3	3	3	3	2	3	5	1	0	0	0	0	0	0	0	0	0	0	0	0	0	1	3
2		7	1	#NULL!	#NULL!	#NULL!	#NULL!	#NULL!		2	2	3	2	65721	2	4	4	4	4	4	4	4	3	3	5	5	3	2	2	2	#NULL!	2	2	1	0	0	0	0	0	0	0	0	0	0	0	0	0	1	3
2		7	1	#NULL!	#NULL!	#NULL!	#NULL!	#NULL!		2	5	7	2	33954	4	4	4	4	4	4	3	3	3	4	5	5	4	3	3	2	2	3	5	1	0	0	0	0	0	0	0	0	0	0	0	0	0	1	3
2		4	#NULL!	#NULL!	#NULL!	1	#NULL!	#NULL!		2	7	11	2	91746	1	1	1	2	2	1	5	5	4	3	5	3	5	4	4	3	#NULL!	3	5	1	0	0	0	0	0	0	0	0	0	0	0	0	0	1	3
2		3	1	#NULL!	#NULL!	#NULL!	#NULL!	#NULL!		2	2	5	1	24012	3	4	3	4	4	4	3	3	2	4	4	4	3	4	4	4	#NULL!	4	6	1	0	0	0	0	0	0	0	0	0	0	0	0	0	1	3
2		5	1	#NULL!	#NULL!	#NULL!	#NULL!	#NULL!		2	3	3	2	49444	2	2	2	4	4	4	5	3	3	5	5	5	5	5	3	3	2	3	5	1	0	0	0	0	0	0	0	0	0	0	0	0	0	1	3
2		8	1	#NULL!	#NULL!	#NULL!	#NULL!	#NULL!		2	2	4	1	92562	2	0	2	4	4	2	5	5	3	5	5	5	5	5	5	3	#NULL!	3	1	1	0	0	0	0	0	0	0	0	0	0	0	0	0	1	3
2		3	1	#NULL!	#NULL!	#NULL!	#NULL!	#NULL!		2	4	7	1	33896	2	2	2	4	4	4	5	5	3	5	5	5	4	5	5	5	#NULL!	1	6	1	1	1	1	0	1	1	0	0	0	0	0	0	0	1	3
2		7	1	#NULL!	#NULL!	#NULL!	#NULL!	#NULL!		2	5	11	2	44012	3	3	3	3	3	3	4	3	3	5	5	5	3	2	2	2	2	3	5	1	0	0	0	0	0	0	0	0	0	0	0	0	0	1	3
2		7	1	#NULL!	#NULL!	#NULL!	#NULL!	#NULL!		2	3	12	1	11226	4	4	4	4	4	4	3	3	3	5	5	5	5	3	3	3	1	1	1	1	0	0	0	1	1	0	0	0	0	0	1	0	1	0	3
2		5	1	#NULL!	#NULL!	#NULL!	#NULL!	#NULL!		2	5	3	1	44708	1	1	1	1	1	1	5	5	5	5	5	5	5	5	1	5	#NULL!	3	6	0	1	0	0	0	0	0	0	0	0	0	0	0	0	1	3
2		7	1	#NULL!	#NULL!	#NULL!	#NULL!	#NULL!		2	5	10	2	11561	3	4	4	4	3	4	4	4	4	5	5	5	5	2	2	2	2	3	5	1	0	0	0	0	0	0	0	0	0	0	1	0	0	0	3
2		4	1	#NULL!	#NULL!	#NULL!	#NULL!	#NULL!		2	4	4	2	08210	4	2	2	4	4	3	4	4	3	4	5	4	3	1	1	1	#NULL!	3	5	1	0	0	0	0	0	0	0	0	0	0	0	0	0	1	3
2		4	1	#NULL!	#NULL!	#NULL!	#NULL!	#NULL!		2	3	3	2	50595	1	1	1	3	3	2	5	5	5	5	5	5	3	3	3	4	2	1	6	1	1	1	1	1	1	1	0	0	0	0	0	0	0	1	3
2		8	1	#NULL!	#NULL!	#NULL!	#NULL!	#NULL!		2	3	5	2	92618	2	3	3	4	3	4	4	4	4	5	5	5	3	4	3	4	#NULL!	3	6	1	0	1	0	1	1	1	0	0	0	0	0	0	0	1	3
2		3	1	#NULL!	#NULL!	#NULL!	#NULL!	#NULL!		2	3	5	2	98315	3	3	3	4	4	4	5	5	5	4	5	5	4	5	4	4	2	1	2	1	0	1	0	1	1	1	0	0	0	0	0	0	0	1	3
2		6	1	#NULL!	#NULL!	#NULL!	#NULL!	#NULL!		1	5	4	2	26062	3	3	2	2	3	2	4	4	3	5	5	5	4	4	4	5	1	4	5	1	1	1	1	0	1	1	0	0	0	0	0	0	0	1	3
2		7	1	#NULL!	#NULL!	#NULL!	#NULL!	#NULL!		2	3	5	2	12306	3	4	4	4	4	4	5	5	5	4	5	5	3	3	3	3	#NULL!	1	6	1	1	1	1	1	1	1	0	0	0	0	0	0	0	1	3
2		7	1	#NULL!	#NULL!	#NULL!	#NULL!	#NULL!		2	5	4	2	28411	1	2	2	3	3	3	4	4	4	5	5	5	4	3	3	3	#NULL!	4	5	1	0	0	0	0	0	0	0	0	0	0	1	0	0	0	3
2		6	1	#NULL!	#NULL!	#NULL!	#NULL!	#NULL!		1	3	4	2	18634	0	1	1	2	2	2	4	4	4	4	4	4	4	4	4	4	#NULL!	1	6	1	0	1	1	1	1	1	0	1	1	1	1	1	1	0	3
2		7	1	#NULL!	#NULL!	#NULL!	#NULL!	#NULL!		2	5	8	2	08751	4	4	3	4	4	4	5	5	5	5	5	5	5	2	2	2	2	3	6	1	0	0	0	0	0	0	0	0	0	0	1	0	0	0	3
2		4	1	#NULL!	#NULL!	#NULL!	#NULL!	#NULL!		2	2	3	1	46241	3	4	3	4	1	2	4	4	4	4	3	4	2	4	4	3	2	1	6	1	0	1	0	0	1	0	0	0	0	0	0	0	0	1	3
2		7	1	#NULL!	#NULL!	#NULL!	#NULL!	#NULL!		2	5	7	1	85023	3	3	1	4	3	4	5	4	3	5	5	5	3	3	3	3	2	3	5	1	0	0	0	0	0	0	0	0	0	0	0	0	0	1	3
2		7	1	#NULL!	#NULL!	#NULL!	#NULL!	#NULL!		2	4	6	2	44107	1	3	4	3	4	4	5	5	5	5	5	5	5	4	4	4	#NULL!	4	5	1	0	1	1	1	1	1	0	0	0	0	0	0	0	1	3
2		6	1	#NULL!	#NULL!	#NULL!	#NULL!	#NULL!		2	2	3	2	01420	0	4	3	4	4	4	5	4	3	4	4	4	3	4	1	1	2	3	5	1	0	0	0	0	0	0	0	0	0	0	1	1	1	0	3
2		3	1	#NULL!	#NULL!	#NULL!	#NULL!	#NULL!		2	3	1	2	73044	2	3	3	4	2	2	4	2	2	4	4	5	2	1	1	1	2	3	5	1	1	1	0	0	0	1	0	0	0	0	0	0	0	1	3
2		3	1	#NULL!	#NULL!	#NULL!	#NULL!	#NULL!		1	5	11	2	22405	2	2	2	4	3	2	4	4	4	4	4	4	3	3	3	3	2	1	5	1	0	0	0	0	0	0	0	0	1	0	1	0	0	0	3
2		7	#NULL!	1	#NULL!	#NULL!	#NULL!	#NULL!		2	4	5	2	32824	4	2	2	2	2	2	4	4	5	5	5	5	5	5	5	5	#NULL!	4	5	1	0	0	0	0	0	0	0	0	0	0	0	0	0	1	3
2		6	#NULL!	1	#NULL!	#NULL!	#NULL!	#NULL!		2	2	4	1	60651	0	0	0	2	3	4	5	5	5	5	5	5	5	5	5	5	#NULL!	1	5	1	0	1	0	0	1	0	0	0	0	0	0	0	0	1	3
2		5	#NULL!	1	#NULL!	#NULL!	#NULL!	#NULL!		2	4	8	2	30813	2	4	0	4	4	4	5	5	4	5	5	5	4	5	5	2	2	3	5	1	0	0	0	0	0	0	0	0	0	0	0	0	0	1	3
2		6	1	#NULL!	#NULL!	#NULL!	#NULL!	#NULL!		2	4	5	2	32256	2	4	2	4	4	4	5	1	1	5	5	5	5	1	1	1	#NULL!	4	5	1	0	0	0	0	0	0	0	0	0	0	0	0	0	1	3
2		6	1	#NULL!	#NULL!	#NULL!	#NULL!	#NULL!		2	2	3	1	60639	0	1	0	0	0	0	4	4	3	4	4	4	4	3	3	4	#NULL!	1	6	0	0	1	0	0	1	0	0	0	0	0	1	0	0	0	3
2		3	#NULL!	#NULL!	#NULL!	#NULL!	#NULL!	1		1	5	4	1	90044	0	2	2	4	4	2	5	4	4	5	4	5	5	5	5	5	#NULL!	1	5	0	0	1	1	0	1	1	0	0	0	0	0	0	0	1	3
2		6	1	#NULL!	#NULL!	#NULL!	#NULL!	#NULL!		2	3	6	2	23831	0	2	0	4	4	0	4	3	3	4	4	4	3	2	2	2	1	1	5	0	1	0	0	0	0	0	0	0	0	0	0	0	0	1	3
2		4	1	#NULL!	#NULL!	#NULL!	#NULL!	#NULL!		2	6	11	1	11201	4	3	3	3	4	4	5	5	5	5	3	4	5	4	4	5	1	3	2	1	0	1	0	1	0	0	0	0	1	1	0	1	0	0	3
2		7	1	#NULL!	#NULL!	#NULL!	#NULL!	#NULL!		2	2	4	2	01906	0	3	3	4	4	4	5	3	3	4	4	4	4	4	2	2	2	3	5	1	1	1	0	0	0	0	0	0	0	0	1	0	0	0	3
2		6	1	#NULL!	#NULL!	#NULL!	#NULL!	#NULL!		2	5	11	2	89134	2	1	1	3	3	3	4	4	4	3	4	5	2	2	2	2	2	3	5	1	1	1	1	1	1	1	0	0	0	0	0	0	0	1	3
2		2	1	#NULL!	#NULL!	#NULL!	#NULL!	#NULL!		2	6	9	2	46033	3	2	1	2	2	1	4	4	4	5	5	5	4	3	4	3	2	4	5	0	1	0	0	0	0	0	0	0	0	0	1	0	1	0	3
2		3	#NULL!	1	#NULL!	#NULL!	#NULL!	#NULL!		2	5	6	2	20747	3	2	2	4	3	3	4	4	4	4	4	4	4	4	4	4	2	3	5	1	0	0	0	0	0	0	0	0	0	0	0	0	0	1	3
2		2	#NULL!	#NULL!	#NULL!	#NULL!	#NULL!	1	Olive	1	4	2	2	82009	2	3	3	2	2	2	5	4	5	4	4	4	5	3	3	3	#NULL!	3	3	1	1	0	1	1	1	0	0	1	0	0	1	0	1	0	3
2		7	1	#NULL!	#NULL!	#NULL!	#NULL!	#NULL!		2	2	4	1	68502	3	4	4	3	2	3	5	5	4	4	5	5	4	4	3	3	#NULL!	4	5	1	0	0	0	0	0	0	0	0	0	0	0	0	0	1	3
2		6	1	#NULL!	#NULL!	#NULL!	#NULL!	#NULL!		2	5	2	2	18250	4	4	4	4	4	4	5	5	4	5	5	5	5	1	1	1	2	3	5	1	0	0	0	0	0	0	0	0	0	0	0	0	0	1	3
2		3	#NULL!	1	#NULL!	#NULL!	#NULL!	#NULL!		2	3	3	2	48066	0	2	0	4	4	0	4	4	4	4	4	4	4	3	4	4	#NULL!	1	6	1	0	0	0	0	0	0	0	0	0	0	0	0	0	1	3
2		5	#NULL!	#NULL!	#NULL!	#NULL!	#NULL!	1		2	3	6	1	11203	4	1	1	3	3	3	1	2	1	1	1	1	1	2	2	5	#NULL!	2	6	1	0	0	0	0	0	0	0	0	0	0	0	0	0	1	3
2		7	1	#NULL!	#NULL!	#NULL!	#NULL!	#NULL!		2	5	3	1	68104	3	3	1	4	3	2	4	4	3	4	4	5	4	3	3	3	1	1	6	1	0	0	0	0	0	0	0	0	0	0	0	0	0	1	3
2		4	#NULL!	1	#NULL!	#NULL!	#NULL!	#NULL!		2	3	4	2	48185	0	2	2	3	3	3	5	5	5	5	5	5	5	5	5	5	#NULL!	1	6	1	0	0	0	0	1	0	0	0	1	0	1	1	0	0	3
2		7	1	#NULL!	#NULL!	#NULL!	#NULL!	#NULL!		2	4	4	1	92057	2	2	2	4	2	2	4	4	4	5	5	5	5	3	3	3	#NULL!	4	6	1	0	0	0	0	0	0	0	0	0	0	0	0	0	1	3
2		5	#NULL!	#NULL!	#NULL!	1	#NULL!	#NULL!		2	5	9	2	60544	3	4	3	4	4	4	3	2	2	5	5	5	2	3	4	2	2	3	6	1	0	0	1	0	1	1	0	0	0	0	0	0	0	1	3
2		7	1	#NULL!	#NULL!	#NULL!	#NULL!	#NULL!		2	4	11	2	80031	3	3	3	3	3	3	3	3	3	4	4	4	3	3	3	3	2	3	6	1	0	0	0	0	0	0	0	0	0	0	0	0	0	1	3
2		3	#NULL!	1	#NULL!	#NULL!	#NULL!	#NULL!		2	2	2	2	39208	0	2	3	4	4	2	3	3	3	5	5	5	3	3	3	3	#NULL!	4	5	1	0	0	0	0	0	0	0	1	1	1	1	0	0	0	3
2		5	1	#NULL!	#NULL!	#NULL!	#NULL!	#NULL!		2	5	5	1	37209	2	3	3	4	3	3	3	3	2	5	5	5	5	2	2	2	2	4	6	1	0	0	0	0	0	0	0	0	0	0	0	0	0	1	3
2		3	1	#NULL!	#NULL!	#NULL!	#NULL!	#NULL!		2	3	3	1	73008	0	0	0	4	4	4	1	1	1	3	3	5	3	1	1	1	2	1	6	1	0	0	0	0	0	0	0	0	0	0	0	0	0	1	3
2		5	1	#NULL!	#NULL!	#NULL!	#NULL!	#NULL!		2	5	1	2	17055	0	0	0	1	1	0	4	4	4	4	4	4	4	4	4	4	#NULL!	3	5	1	1	1	0	0	0	0	0	0	0	0	0	0	0	1	3
2		7	#NULL!	1	#NULL!	#NULL!	#NULL!	#NULL!		2	6	2	2	75208	0	4	4	4	4	4	5	5	1	5	5	5	5	5	5	5	2	1	6	1	1	1	1	1	1	1	0	0	0	0	0	0	0	1	3
2		6	1	#NULL!	#NULL!	#NULL!	#NULL!	#NULL!		2	2	8	2	66213	0	0	0	3	3	2	5	5	5	5	5	5	5	5	5	5	2	3	6	1	0	0	0	0	0	0	0	0	0	0	0	0	0	1	3
2		4	#NULL!	#NULL!	#NULL!	#NULL!	#NULL!	1	Spanish	1	5	4	2	77581	3	3	2	3	2	2	5	5	3	5	5	5	4	4	4	3	#NULL!	1	2	0	0	1	1	0	1	1	0	0	0	0	0	0	0	1	3
2		7	1	#NULL!	#NULL!	#NULL!	#NULL!	#NULL!		2	2	4	2	55972	0	2	0	4	0	2	5	5	3	5	5	5	5	2	2	2	#NULL!	3	6	1	0	0	0	0	0	0	0	0	0	0	0	0	0	1	3
2		7	1	#NULL!	#NULL!	#NULL!	#NULL!	#NULL!		2	5	5	2	80521	2	2	2	3	2	2	5	5	5	5	5	5	5	3	3	3	2	3	5	1	1	1	1	1	1	1	0	0	0	0	0	0	0	1	3
2		3	1	#NULL!	#NULL!	#NULL!	#NULL!	#NULL!		2	5	10	2	19438	4	4	4	4	3	2	3	2	2	3	3	3	2	3	2	2	2	4	6	1	1	1	1	1	1	0	0	0	0	0	0	0	0	1	3
2		7	1	#NULL!	#NULL!	#NULL!	#NULL!	#NULL!		2	2	2	2	32561	3	3	0	3	3	3	2	2	2	4	4	4	4	2	2	2	2	3	5	1	0	1	0	1	1	0	0	0	0	0	1	0	0	0	3
2		7	1	#NULL!	#NULL!	#NULL!	#NULL!	#NULL!		2	5	8	2	17055	2	3	2	4	4	4	4	4	3	4	4	4	3	3	3	3	2	3	5	1	0	1	1	1	1	1	0	0	0	0	0	0	0	1	3
2		7	1	#NULL!	#NULL!	#NULL!	#NULL!	#NULL!		2	6	8	2	72712	2	4	2	4	3	4	5	5	5	5	5	5	5	3	3	3	#NULL!	3	1	1	0	0	0	0	0	0	0	0	0	0	0	0	0	1	3
2		6	1	#NULL!	#NULL!	#NULL!	#NULL!	#NULL!		2	5	4	2	44052	2	3	2	3	2	1	4	4	3	4	4	4	3	3	3	3	#NULL!	1	2	1	0	0	0	0	0	0	0	0	0	0	0	0	0	1	3
2		8	1	#NULL!	#NULL!	#NULL!	#NULL!	#NULL!		2	4	2	1	90805	4	0	0	4	4	4	4	4	4	5	5	5	5	4	4	4	#NULL!	1	5	1	0	0	0	1	1	1	0	0	0	0	0	0	0	1	3
2		3	1	#NULL!	#NULL!	#NULL!	#NULL!	#NULL!		2	4	2	2	49442	2	3	3	3	3	2	4	4	4	4	4	4	4	4	4	4	#NULL!	3	5	1	0	0	0	0	0	0	0	0	0	0	0	0	0	1	3
2		8	1	#NULL!	#NULL!	#NULL!	#NULL!	#NULL!		2	5	7	1	38117	3	3	3	4	3	3	4	4	4	5	5	5	5	3	3	3	#NULL!	2	5	1	0	0	0	0	0	0	0	0	0	0	0	0	0	1	3
2		7	#NULL!	#NULL!	#NULL!	1	#NULL!	#NULL!		2	6	11	2	73072	3	0	0	4	0	4	3	3	2	4	5	4	2	2	2	1	2	3	3	0	1	0	0	0	0	0	0	0	0	0	0	0	0	1	3
2		6	1	#NULL!	#NULL!	#NULL!	#NULL!	#NULL!		2	2	1	2	35903	1	1	1	2	2	2	4	4	4	4	4	4	4	4	4	4	#NULL!	1	5	1	0	0	0	0	0	0	0	0	0	0	0	0	0	1	3
2		3	1	#NULL!	#NULL!	#NULL!	#NULL!	#NULL!		2	4	3	1	76209	1	3	2	3	2	1	4	3	3	4	5	5	4	4	3	2	1	1	6	0	1	0	0	1	1	0	0	0	0	0	1	0	0	0	3
2		6	1	#NULL!	#NULL!	#NULL!	#NULL!	#NULL!		2	5	3	2	02180	3	4	4	4	4	4	5	5	5	5	5	5	5	4	5	5	2	1	2	1	0	0	1	1	1	0	0	0	0	0	0	0	0	1	3
2		3	1	#NULL!	1	#NULL!	#NULL!	#NULL!		2	1	1	1	65301	3	4	4	4	4	3	5	5	3	5	5	5	5	3	3	3	2	1	5	1	0	0	0	0	0	0	0	0	0	0	0	0	0	1	3
2		4	1	#NULL!	#NULL!	#NULL!	#NULL!	#NULL!		1	6	5	1	76140	3	2	2	3	3	3	2	4	3	4	5	5	4	4	3	3	2	3	5	1	0	0	0	0	0	0	0	0	0	0	0	0	0	1	3
2		3	1	#NULL!	#NULL!	#NULL!	#NULL!	#NULL!		2	5	5	2	98059	1	3	1	4	3	2	5	5	5	5	5	5	5	5	5	5	#NULL!	1	5	1	1	1	0	0	0	0	0	0	0	0	0	0	0	1	3
2		3	1	#NULL!	#NULL!	#NULL!	#NULL!	#NULL!		1	1	3	1	60639	2	2	0	4	4	3	1	5	5	5	5	5	5	5	5	5	#NULL!	1	6	1	0	1	0	1	0	0	0	0	0	0	0	0	0	1	3
2		8	1	#NULL!	#NULL!	#NULL!	#NULL!	#NULL!		2	5	8	2	27103	4	3	1	3	2	2	3	2	2	4	4	5	4	1	1	1	2	3	6	1	0	0	0	0	0	0	0	0	0	0	1	0	0	0	3
2		3	1	#NULL!	#NULL!	#NULL!	#NULL!	#NULL!		2	6	11	2	72034	3	3	2	4	4	3	4	3	3	5	4	5	4	3	3	3	1	4	5	1	0	0	0	0	0	0	0	0	0	0	0	0	0	1	3
2		7	1	#NULL!	#NULL!	#NULL!	#NULL!	#NULL!		2	3	8	2	44236	3	1	3	4	4	3	4	4	4	5	5	5	4	3	3	4	#NULL!	1	6	1	0	1	1	0	1	1	0	0	0	0	0	0	0	1	3
2		4	1	#NULL!	#NULL!	#NULL!	#NULL!	#NULL!		2	3	12	2	32765	0	4	0	4	4	4	3	3	3	4	4	4	4	3	3	3	#NULL!	1	6	1	0	0	0	0	0	0	0	0	0	0	0	0	0	1	3
2		8	1	#NULL!	#NULL!	#NULL!	#NULL!	#NULL!		2	2	4	2	33066	4	4	4	4	4	4	5	5	5	5	5	5	5	5	5	4	#NULL!	2	5	1	0	1	1	1	1	1	0	0	0	0	0	0	0	1	3
2		7	1	#NULL!	#NULL!	#NULL!	#NULL!	#NULL!		2	2	2	1	92335	4	4	4	4	3	4	5	5	5	5	5	5	5	3	4	3	#NULL!	2	5	1	0	0	0	0	0	0	0	0	0	0	1	0	0	0	3
2		6	1	#NULL!	#NULL!	#NULL!	#NULL!	#NULL!		2	4	5	2	75032	1	2	0	1	1	0	1	3	5	5	4	4	2	3	3	3	#NULL!	2	6	1	0	0	0	0	0	0	0	1	1	0	1	0	0	0	3
2		6	1	#NULL!	#NULL!	#NULL!	#NULL!	#NULL!		2	4	5	2	34771	3	4	3	4	4	4	5	5	5	5	5	5	5	3	2	2	2	3	1	1	0	0	0	0	0	0	0	0	0	0	0	0	0	1	3
2		4	1	#NULL!	#NULL!	#NULL!	#NULL!	#NULL!		2	3	6	2	27603	3	3	3	4	4	4	5	5	5	5	5	5	5	4	2	2	2	3	2	1	1	1	1	1	1	1	0	0	0	0	0	0	0	1	3
2		7	1	#NULL!	#NULL!	#NULL!	#NULL!	#NULL!		2	6	4	1	15207	2	3	3	4	4	4	5	5	5	5	5	5	5	4	4	4	#NULL!	1	6	1	1	1	1	0	1	1	0	0	0	0	0	0	0	1	3
2		4	1	#NULL!	#NULL!	#NULL!	#NULL!	#NULL!		1	2	2	1	02905	4	4	4	4	4	4	3	3	1	3	3	3	3	3	3	3	#NULL!	1	5	1	0	0	0	0	0	0	0	0	0	0	1	0	0	0	3
2		6	1	#NULL!	#NULL!	#NULL!	#NULL!	#NULL!		1	4	2	1	10454	4	4	4	4	4	4	2	2	2	2	4	4	2	2	2	2	1	2	6	1	0	1	1	0	1	1	0	0	0	0	0	0	0	1	3
2		7	1	#NULL!	#NULL!	#NULL!	#NULL!	#NULL!		2	4	3	2	77471	3	3	2	4	3	2	4	4	2	5	4	5	2	2	2	1	2	3	5	1	0	0	0	0	0	0	0	0	0	0	1	0	0	0	3
2		4	#NULL!	#NULL!	#NULL!	#NULL!	#NULL!	1	Middle eastern	2	4	8	2	32804	2	2	2	3	3	2	3	3	3	4	4	4	3	3	3	3	2	1	5	1	0	0	0	0	0	0	0	0	0	0	0	0	0	1	3
2		7	#NULL!	1	#NULL!	#NULL!	#NULL!	#NULL!		2	5	1	2	21045	1	2	0	4	2	2	1	1	1	5	5	5	1	1	1	1	2	3	5	1	0	0	0	0	0	0	0	1	0	0	1	0	0	0	3
2		6	#NULL!	1	#NULL!	#NULL!	#NULL!	#NULL!		2	6	5	2	29809	2	4	4	4	4	2	5	5	5	5	5	5	4	4	4	4	#NULL!	2	5	1	0	1	0	0	1	0	0	0	0	0	0	0	0	1	3
2		6	#NULL!	1	#NULL!	#NULL!	#NULL!	#NULL!		2	5	4	2	30120	2	3	2	4	4	4	4	4	4	5	5	5	4	4	3	3	2	1	5	1	0	0	0	0	0	0	0	0	0	0	0	0	0	1	3
2		5	1	#NULL!	#NULL!	#NULL!	#NULL!	#NULL!		2	2	1	1	35805	0	0	0	3	2	0	5	5	5	5	5	5	5	5	5	5	#NULL!	1	5	1	0	0	0	0	0	0	0	0	0	0	0	0	0	1	3
2		6	1	#NULL!	#NULL!	#NULL!	#NULL!	#NULL!		2	5	6	2	34442	3	3	4	4	4	4	1	5	5	1	1	1	1	1	1	1	2	3	1	0	1	1	0	0	0	0	0	1	1	1	1	1	1	0	3
2		2	1	#NULL!	1	1	#NULL!	#NULL!		1	4	4	1	11206	4	4	0	4	4	4	5	5	5	5	5	5	5	5	5	5	#NULL!	2	6	1	0	0	0	0	0	0	0	0	1	0	1	1	0	0	3
2		2	1	#NULL!	#NULL!	#NULL!	#NULL!	#NULL!		2	3	11	2	45233	2	0	0	4	3	2	5	4	4	5	5	5	3	3	3	3	2	4	6	0	1	0	1	0	1	0	0	0	0	1	1	0	1	0	3
2		4	1	#NULL!	1	#NULL!	#NULL!	#NULL!		2	2	4	2	37040	4	3	3	3	0	0	4	4	4	4	5	5	5	4	4	4	#NULL!	1	1	1	1	1	1	1	1	1	0	0	0	0	0	0	0	1	3
2		4	#NULL!	1	#NULL!	#NULL!	#NULL!	#NULL!		2	5	4	2	48328	2	2	2	2	3	2	1	5	5	1	1	1	1	3	3	5	1	1	5	1	1	1	1	1	1	1	0	0	0	0	0	0	0	1	3
2		6	1	#NULL!	#NULL!	#NULL!	#NULL!	#NULL!		2	3	11	2	44319	3	3	2	4	3	3	5	5	5	4	4	5	4	3	3	3	#NULL!	3	6	1	0	0	0	0	0	0	0	1	0	1	0	1	0	0	3
2		7	1	#NULL!	#NULL!	#NULL!	#NULL!	#NULL!		2	2	3	2	85143	2	2	1	4	4	4	5	5	4	5	5	5	5	3	3	1	#NULL!	3	5	0	0	1	0	0	1	0	0	0	0	0	0	0	0	1	3
2		7	1	#NULL!	#NULL!	#NULL!	#NULL!	#NULL!		2	6	10	2	46236	0	2	1	3	3	2	5	5	5	5	5	5	5	5	4	4	#NULL!	4	6	0	0	1	0	0	0	0	0	0	0	0	0	0	0	1	3
2		7	1	#NULL!	#NULL!	#NULL!	#NULL!	#NULL!		2	4	4	2	93446	3	4	0	4	3	3	3	4	4	4	4	4	3	3	3	3	2	3	5	1	0	0	0	0	0	0	0	0	0	0	0	1	0	0	3
2		5	1	#NULL!	#NULL!	#NULL!	#NULL!	#NULL!		2	4	5	2	32220	4	4	4	4	4	4	5	5	5	4	5	5	5	5	5	5	#NULL!	3	6	1	0	1	1	1	1	1	0	0	0	0	0	0	0	1	3
2		5	1	#NULL!	#NULL!	#NULL!	#NULL!	#NULL!		2	3	11	2	93035	2	4	0	4	4	2	5	5	3	5	5	5	5	4	5	4	2	3	5	1	1	1	1	1	1	1	0	0	0	0	0	1	0	0	3
2		7	1	#NULL!	#NULL!	#NULL!	#NULL!	#NULL!		2	5	4	2	62002	2	3	2	4	4	3	5	3	3	5	5	5	5	3	3	3	#NULL!	3	5	1	0	0	0	0	0	0	0	0	0	0	0	0	0	1	3
2		9	1	#NULL!	#NULL!	#NULL!	#NULL!	#NULL!		2	5	7	2	07747	4	4	2	4	4	4	5	5	5	5	5	5	3	1	1	2	2	3	5	1	1	1	0	0	0	0	0	1	1	0	1	0	1	0	3
2		6	1	#NULL!	#NULL!	#NULL!	#NULL!	#NULL!		2	3	6	2	92404	4	4	4	4	2	4	4	4	4	5	5	5	3	2	2	2	#NULL!	3	4	1	0	0	0	0	0	0	0	0	0	0	0	0	0	1	3
2		4	1	#NULL!	#NULL!	#NULL!	#NULL!	#NULL!		2	3	4	1	03246	0	4	2	4	4	0	3	3	3	5	5	5	3	5	4	4	#NULL!	4	6	1	0	0	0	0	0	0	0	0	0	0	0	0	0	1	3
2		7	1	#NULL!	#NULL!	#NULL!	#NULL!	#NULL!		2	3	3	2	70006	4	4	4	4	4	0	4	4	4	4	5	5	3	3	3	3	#NULL!	3	6	1	0	0	0	0	0	0	0	0	0	0	0	0	0	1	3
2		4	1	#NULL!	#NULL!	#NULL!	#NULL!	#NULL!		2	3	3	2	43224	2	3	3	4	4	4	5	5	5	5	5	5	5	4	4	4	2	3	5	1	1	1	1	1	1	1	0	0	0	0	0	0	0	1	3
2		3	1	#NULL!	#NULL!	#NULL!	#NULL!	#NULL!		2	5	4	2	90210	2	2	2	4	2	2	4	4	4	4	4	4	4	4	4	4	#NULL!	2	6	1	0	0	0	0	0	0	0	0	0	0	0	0	0	1	3
2		4	1	#NULL!	#NULL!	#NULL!	#NULL!	#NULL!		2	6	12	2	10598	3	4	2	4	3	3	4	3	3	4	4	4	4	4	2	2	2	1	4	1	0	0	0	0	0	0	0	0	0	0	1	0	0	0	3
2		8	1	#NULL!	#NULL!	#NULL!	#NULL!	#NULL!		2	3	2	1	71201	3	4	2	4	2	3	4	2	1	5	5	5	4	1	1	1	2	3	3	1	0	0	1	1	0	0	0	0	0	0	0	0	0	1	3
2		7	1	#NULL!	#NULL!	#NULL!	#NULL!	#NULL!		2	3	6	2	14617	2	3	2	3	2	2	4	4	4	4	4	4	4	4	4	4	2	2	5	1	1	1	1	0	1	1	0	0	0	0	0	0	0	1	3
2		6	1	#NULL!	#NULL!	#NULL!	#NULL!	#NULL!		2	5	11	2	06062	2	2	2	3	3	2	5	4	3	5	5	5	5	4	3	3	2	3	5	1	0	0	0	0	0	0	0	0	0	0	1	0	0	0	3
2		7	1	#NULL!	#NULL!	#NULL!	#NULL!	#NULL!		2	3	5	2	55431	3	4	4	4	4	4	3	2	3	4	3	2	2	3	2	1	2	3	6	0	0	1	0	0	1	0	0	1	0	0	0	0	0	0	3
2		4	#NULL!	1	#NULL!	#NULL!	#NULL!	#NULL!		2	3	5	1	07111	3	3	3	4	3	3	4	5	5	4	4	4	4	4	4	4	#NULL!	4	6	1	1	1	0	0	0	0	0	0	0	0	0	0	0	1	3
2		6	#NULL!	1	#NULL!	#NULL!	#NULL!	#NULL!		2	2	1	1	30314	3	2	2	2	2	3	4	4	4	4	4	4	4	4	4	4	1	1	6	1	0	0	0	0	0	0	0	0	0	0	0	0	0	1	3
2		7	1	#NULL!	#NULL!	#NULL!	#NULL!	#NULL!		2	5	4	1	84074	3	3	4	4	2	4	4	4	2	5	4	4	4	4	3	2	2	3	6	1	0	0	0	0	0	0	0	0	1	1	1	1	1	0	3
2		7	1	#NULL!	#NULL!	#NULL!	#NULL!	#NULL!		2	6	3	2	27105	4	4	4	4	4	4	5	4	4	5	5	5	4	4	3	4	2	2	5	1	0	1	0	0	1	0	0	0	0	0	0	0	0	1	3
2		7	#NULL!	1	#NULL!	#NULL!	#NULL!	#NULL!		2	6	4	2	19934	2	2	0	3	3	2	3	3	3	4	4	4	3	2	2	2	#NULL!	4	1	1	0	0	0	0	0	0	0	0	0	0	1	0	0	0	3
2		7	1	#NULL!	#NULL!	#NULL!	#NULL!	#NULL!		2	5	2	2	74135	3	3	3	3	3	3	4	4	3	5	4	5	4	3	3	3	2	3	5	1	0	0	0	0	0	0	0	0	0	0	1	0	0	0	3
2		4	1	#NULL!	#NULL!	#NULL!	#NULL!	#NULL!		2	3	9	1	57110	0	0	0	4	4	4	4	4	4	3	3	3	3	4	4	4	2	1	5	1	0	0	0	0	0	0	0	0	0	0	0	0	0	1	3
2		6	1	#NULL!	#NULL!	#NULL!	#NULL!	#NULL!		1	2	12	2	11782	3	4	2	4	4	3	1	5	3	1	2	1	1	4	2	3	#NULL!	2	1	1	0	1	0	0	1	1	0	0	0	0	0	0	0	1	3
2		6	1	#NULL!	#NULL!	#NULL!	#NULL!	#NULL!		2	2	2	2	60505	1	1	2	2	2	2	4	4	3	5	5	5	4	3	3	3	#NULL!	1	6	1	0	0	0	0	0	0	0	0	0	0	0	0	0	1	3
2		7	1	#NULL!	1	#NULL!	#NULL!	#NULL!		2	4	7	1	94109	4	4	2	4	4	3	5	5	4	5	5	5	5	5	3	5	#NULL!	3	6	1	1	1	1	1	1	1	0	0	0	0	0	0	0	1	3
2		7	1	#NULL!	#NULL!	#NULL!	#NULL!	#NULL!		2	5	9	2	34638	3	3	3	4	4	4	5	5	5	5	5	5	5	5	5	5	2	2	6	1	0	0	0	0	0	0	0	0	0	0	0	0	0	1	3
2		3	1	#NULL!	#NULL!	#NULL!	#NULL!	#NULL!		2	6	6	2	37343	4	4	4	4	4	4	3	2	2	4	4	4	2	2	2	2	2	3	6	1	0	0	0	0	0	0	0	0	0	0	1	0	0	0	3
2		6	1	#NULL!	#NULL!	#NULL!	#NULL!	#NULL!		2	5	6	2	43085	4	4	4	4	3	4	2	2	2	5	5	5	2	1	1	1	2	3	5	1	0	0	0	0	0	0	0	0	0	0	0	0	0	1	3
2		8	1	#NULL!	#NULL!	#NULL!	#NULL!	#NULL!		2	6	10	2	63366	1	3	3	3	3	3	4	4	4	5	5	5	5	3	3	4	2	3	2	1	1	1	1	1	1	1	0	0	0	0	0	0	0	1	3
2		5	1	#NULL!	#NULL!	#NULL!	#NULL!	#NULL!		2	3	8	2	16510	0	2	2	4	2	2	3	3	3	5	5	5	3	1	1	1	2	3	5	1	0	0	0	0	0	0	0	0	0	0	1	0	0	0	3
2		7	1	#NULL!	#NULL!	#NULL!	#NULL!	#NULL!		2	5	11	1	62704	3	4	3	4	3	3	3	3	3	5	5	5	3	3	3	3	#NULL!	1	5	1	0	0	0	0	0	0	0	0	0	0	0	0	0	1	3
2		4	1	#NULL!	#NULL!	#NULL!	#NULL!	#NULL!		2	5	1	2	11762	3	4	4	4	4	3	5	5	5	5	5	5	5	3	3	3	2	1	5	1	0	0	0	0	0	0	0	0	0	0	0	0	0	1	3
2		6	1	#NULL!	#NULL!	#NULL!	#NULL!	#NULL!		2	4	6	2	89138	0	0	0	0	0	0	5	5	5	5	4	5	5	3	3	3	#NULL!	1	1	1	0	0	0	0	0	0	0	0	0	0	0	0	0	1	3
2		4	1	#NULL!	#NULL!	#NULL!	#NULL!	#NULL!		2	6	4	2	21222	3	3	3	3	3	1	3	3	2	4	4	4	3	3	4	4	#NULL!	3	5	1	0	0	0	0	0	0	0	0	0	0	0	0	0	1	3
2		4	1	#NULL!	#NULL!	#NULL!	#NULL!	#NULL!		2	2	11	2	43081	4	4	3	2	2	2	3	3	3	4	4	4	3	3	3	3	#NULL!	2	6	1	0	0	0	0	0	0	0	0	0	0	0	0	0	1	3
2		4	1	#NULL!	#NULL!	#NULL!	#NULL!	#NULL!		2	2	3	2	40422	2	4	2	3	3	2	3	3	4	5	5	5	4	3	2	2	2	3	5	1	0	0	0	0	0	0	0	0	0	0	0	0	0	1	3
2		6	1	#NULL!	#NULL!	#NULL!	#NULL!	#NULL!		2	3	3	2	50125	2	3	2	4	4	3	5	5	5	5	5	5	5	3	4	4	#NULL!	1	5	1	1	1	1	1	1	1	0	0	0	0	0	0	1	0	3
2		7	1	#NULL!	#NULL!	#NULL!	#NULL!	#NULL!		2	5	6	2	06518	2	2	1	4	4	4	5	5	5	5	5	5	5	3	3	3	2	1	6	1	1	1	1	1	1	1	0	0	0	0	0	0	0	1	3
2		7	1	#NULL!	#NULL!	#NULL!	#NULL!	#NULL!		1	3	4	2	76021	0	0	0	0	0	0	4	4	4	4	4	4	4	4	4	3	#NULL!	2	5	1	0	0	0	0	0	0	0	0	0	0	1	0	0	0	3
2		5	1	#NULL!	#NULL!	#NULL!	#NULL!	#NULL!		2	3	2	1	74501	4	4	0	4	4	4	5	5	5	3	5	5	5	3	3	3	2	3	5	1	0	0	0	1	1	0	0	0	0	0	1	0	0	0	3
2		6	1	#NULL!	#NULL!	#NULL!	#NULL!	#NULL!		2	2	4	1	93550	2	3	0	3	3	3	3	4	4	5	5	5	5	4	2	3	2	3	5	0	1	1	0	1	1	0	0	0	0	0	0	0	0	1	3
2		7	1	#NULL!	#NULL!	#NULL!	#NULL!	#NULL!		2	2	5	2	46845	0	1	3	3	3	3	3	3	3	4	4	4	3	3	3	3	#NULL!	1	6	1	0	0	0	0	0	0	0	0	0	0	0	0	0	1	3
2		3	1	#NULL!	#NULL!	#NULL!	#NULL!	#NULL!		2	4	6	2	60502	1	2	1	1	1	1	2	3	3	2	3	3	3	4	4	4	#NULL!	1	4	0	0	0	1	1	1	0	0	0	0	0	1	0	1	0	3
2		6	1	#NULL!	#NULL!	#NULL!	#NULL!	#NULL!		2	2	5	1	04240	0	2	2	0	0	0	3	3	3	3	3	3	2	3	3	3	#NULL!	1	6	1	0	0	0	0	0	0	0	1	0	0	0	0	0	0	3
2		5	1	#NULL!	#NULL!	#NULL!	#NULL!	#NULL!		2	7	8	2	01301	2	3	3	4	2	3	4	4	2	3	5	5	3	1	1	2	#NULL!	1	5	1	0	0	0	0	0	0	0	0	0	0	0	0	0	1	3
2		5	#NULL!	1	#NULL!	#NULL!	#NULL!	#NULL!		2	4	7	1	29801	3	3	2	3	4	2	1	4	4	4	4	5	3	5	4	4	2	3	5	1	0	0	0	0	0	0	0	0	0	0	0	0	0	1	3
2		6	1	#NULL!	#NULL!	#NULL!	#NULL!	#NULL!		2	4	9	2	15239	2	4	2	4	4	4	5	5	4	5	5	5	5	4	3	3	#NULL!	1	1	1	0	0	0	0	0	0	0	0	0	0	0	0	0	1	3
2		7	1	#NULL!	#NULL!	#NULL!	#NULL!	#NULL!		2	6	12	2	92677	2	2	2	4	1	1	3	3	3	3	4	3	3	2	2	2	#NULL!	3	5	1	0	0	0	0	0	0	0	0	0	0	0	1	0	0	3
2		3	1	#NULL!	#NULL!	#NULL!	#NULL!	#NULL!		2	5	6	1	48104	3	4	4	4	4	4	4	4	4	5	5	5	5	2	2	2	#NULL!	1	5	1	1	1	1	1	1	1	0	0	0	0	0	0	0	1	3
2		4	1	#NULL!	#NULL!	#NULL!	#NULL!	#NULL!		2	2	6	2	45330	0	2	3	4	4	4	3	4	1	2	2	3	4	4	4	3	1	1	4	1	1	1	1	1	1	1	0	0	0	0	0	0	0	1	3
2		4	1	#NULL!	#NULL!	#NULL!	#NULL!	#NULL!		2	3	2	2	43160	3	3	3	4	4	3	4	4	4	5	5	5	5	3	3	2	#NULL!	2	4	0	0	0	0	1	1	0	0	1	0	0	1	0	1	0	3
2		5	#NULL!	1	#NULL!	#NULL!	#NULL!	#NULL!		2	3	2	2	32724	2	2	1	4	3	2	4	4	3	4	4	5	4	3	3	3	2	3	5	1	1	1	1	1	1	1	0	0	0	0	0	0	0	1	3
2		4	#NULL!	1	#NULL!	#NULL!	#NULL!	#NULL!		2	2	6	1	35020	1	4	4	4	4	4	4	2	2	2	2	4	3	4	3	4	1	1	1	1	0	1	0	1	1	1	0	0	0	0	0	0	0	1	3
2		5	1	#NULL!	#NULL!	#NULL!	#NULL!	#NULL!		2	2	2	1	73072	3	4	4	4	4	4	4	4	4	4	4	4	4	4	4	3	#NULL!	2	5	1	1	1	1	1	1	1	0	0	0	0	0	0	0	1	3
2		7	1	#NULL!	#NULL!	#NULL!	#NULL!	#NULL!		2	5	8	2	98092	1	2	3	4	4	2	4	4	3	5	5	5	4	1	1	1	#NULL!	4	5	1	0	0	0	0	0	0	0	0	0	0	0	0	0	1	3
2		6	1	#NULL!	#NULL!	#NULL!	#NULL!	#NULL!		2	2	4	2	14043	0	3	0	4	4	4	4	4	4	5	5	5	4	1	1	1	1	2	5	0	0	0	0	1	1	0	0	1	0	0	1	0	1	0	3
2		7	1	#NULL!	#NULL!	#NULL!	#NULL!	#NULL!		2	6	11	2	08062	0	2	0	4	3	3	4	5	4	5	5	5	5	5	2	2	2	3	6	1	0	0	0	0	0	0	0	0	0	0	0	0	0	1	3
2		6	1	#NULL!	#NULL!	#NULL!	#NULL!	#NULL!		2	2	3	1	14612	4	4	4	4	4	4	3	4	2	5	5	5	2	1	1	1	1	1	6	1	0	0	0	0	0	0	0	0	0	0	0	0	0	1	3
2		6	1	#NULL!	#NULL!	#NULL!	#NULL!	#NULL!		2	5	3	2	76108	0	2	0	4	0	4	3	3	3	3	3	3	3	3	3	3	2	3	5	1	0	0	0	0	0	0	0	0	0	0	0	0	0	1	3
2		7	1	#NULL!	#NULL!	#NULL!	#NULL!	#NULL!		2	5	6	1	75224	3	4	2	3	3	3	5	5	4	5	5	5	4	4	4	4	#NULL!	3	6	1	0	0	0	0	0	0	0	0	0	0	0	0	0	1	3
2		6	1	#NULL!	#NULL!	#NULL!	#NULL!	#NULL!		2	3	2	2	34606	0	4	4	4	4	4	4	5	4	4	4	4	3	3	3	4	#NULL!	2	4	0	0	1	0	0	1	1	0	0	0	0	1	0	0	0	3
2		7	1	#NULL!	#NULL!	#NULL!	#NULL!	#NULL!		2	5	8	2	95928	3	4	4	4	4	4	5	3	5	5	5	5	3	5	3	4	2	2	2	1	0	0	0	0	0	0	0	1	0	0	0	0	0	0	3
2		5	1	#NULL!	#NULL!	#NULL!	#NULL!	#NULL!		2	3	10	2	60126	0	0	0	0	0	0	5	5	3	5	5	5	5	5	5	5	#NULL!	1	1	1	0	0	0	0	0	0	0	0	0	0	0	0	0	1	3
2		7	1	#NULL!	#NULL!	#NULL!	#NULL!	#NULL!		2	5	12	2	76116	4	4	3	4	3	3	4	4	4	5	5	5	4	4	4	4	#NULL!	1	5	1	0	1	1	1	1	0	0	0	0	0	0	0	0	1	3
2		4	1	#NULL!	#NULL!	#NULL!	#NULL!	#NULL!		2	5	12	2	60089	2	4	2	4	2	3	4	4	3	5	4	4	4	5	3	4	1	1	6	1	0	0	0	0	0	0	0	0	0	0	0	0	0	1	3
2		7	1	#NULL!	#NULL!	#NULL!	#NULL!	#NULL!		2	5	11	2	33463	3	3	3	3	3	3	4	4	3	4	4	4	3	3	3	2	2	3	5	1	0	0	0	0	0	0	0	0	0	0	0	0	0	1	3
2		4	1	#NULL!	#NULL!	#NULL!	#NULL!	#NULL!		2	5	7	2	55912	3	3	3	3	3	3	5	5	3	4	4	4	4	3	3	3	#NULL!	1	6	0	0	1	0	0	0	0	0	0	0	0	0	0	0	1	3
2		8	1	#NULL!	#NULL!	#NULL!	#NULL!	#NULL!		2	5	2	2	34743	3	3	3	4	3	4	5	2	3	5	5	4	2	4	3	2	2	3	5	0	0	1	0	0	0	0	0	0	0	0	0	0	0	1	3
2		5	1	#NULL!	#NULL!	#NULL!	#NULL!	#NULL!		2	5	11	2	54904	3	3	3	4	4	3	3	4	3	5	4	5	4	4	2	2	2	3	6	1	0	0	0	0	0	0	0	0	0	0	0	0	0	1	3
2		6	1	#NULL!	#NULL!	#NULL!	#NULL!	#NULL!		2	4	11	2	72704	4	3	3	4	3	3	5	4	4	5	5	5	3	5	3	4	#NULL!	4	5	1	0	0	0	0	0	0	0	0	0	0	0	0	0	1	3
2		3	#NULL!	1	#NULL!	#NULL!	#NULL!	#NULL!		2	5	5	1	28226	4	4	4	4	4	4	4	3	3	5	5	5	4	5	2	1	2	3	6	1	0	0	0	0	0	0	0	0	0	0	1	0	0	0	3
2		4	1	#NULL!	#NULL!	#NULL!	#NULL!	#NULL!		1	4	11	2	48433	0	4	0	4	4	4	5	5	5	5	5	5	5	5	5	5	#NULL!	3	6	1	1	1	1	1	1	1	0	0	0	0	0	0	0	1	3
2		5	1	#NULL!	#NULL!	#NULL!	#NULL!	#NULL!		2	3	5	1	93955	1	2	2	4	4	0	2	2	2	3	5	5	3	1	1	2	2	3	1	1	0	0	0	0	0	0	0	0	0	1	0	0	0	0	3
2		7	1	#NULL!	#NULL!	#NULL!	#NULL!	#NULL!		2	3	4	2	92345	4	4	4	4	4	4	4	4	4	5	5	5	5	4	2	2	#NULL!	1	6	1	0	0	0	0	0	0	0	0	0	0	0	0	0	1	3
2		3	1	#NULL!	#NULL!	#NULL!	#NULL!	#NULL!		2	3	10	2	78666	1	4	2	4	4	4	5	5	3	5	5	5	5	1	1	3	2	3	5	1	0	0	0	1	0	0	0	0	1	1	0	0	0	0	3
2		3	1	1	#NULL!	#NULL!	#NULL!	#NULL!		1	5	6	2	03064	2	2	2	2	2	2	5	5	5	5	5	5	5	4	4	4	1	1	1	1	0	0	0	0	0	0	0	0	1	0	1	0	0	0	3
2		3	1	#NULL!	#NULL!	#NULL!	#NULL!	#NULL!		2	2	1	2	52302	1	3	3	4	3	4	3	3	3	3	3	4	3	3	3	3	#NULL!	1	5	1	1	1	1	0	1	1	0	0	0	0	1	0	0	0	3
2		6	#NULL!	1	#NULL!	#NULL!	#NULL!	#NULL!		2	4	4	2	18301	4	4	2	4	4	4	1	5	3	5	5	5	1	5	5	5	#NULL!	2	5	1	1	1	1	1	1	1	0	0	0	0	0	0	0	1	3
2		3	1	#NULL!	#NULL!	#NULL!	#NULL!	#NULL!		2	5	11	1	68803	2	3	3	4	3	3	3	3	3	4	4	4	4	4	4	4	#NULL!	3	5	1	0	0	0	0	0	0	0	0	0	0	0	0	0	1	3
2		9	1	#NULL!	#NULL!	#NULL!	#NULL!	#NULL!		2	3	2	1	85022	4	4	4	4	4	4	4	2	3	5	5	5	5	1	1	1	2	3	4	0	1	0	0	0	0	0	0	0	0	0	0	0	0	1	3
2		7	1	#NULL!	#NULL!	#NULL!	#NULL!	#NULL!		2	5	12	2	20148	4	4	4	4	4	4	5	5	4	5	5	5	5	5	5	5	2	3	1	1	1	1	1	1	1	0	0	0	0	0	1	0	0	0	3
2		3	1	#NULL!	#NULL!	#NULL!	#NULL!	#NULL!		2	3	1	2	42276	0	0	0	4	4	4	4	4	4	4	4	4	4	4	4	4	2	3	2	1	0	0	0	0	0	0	0	0	0	0	0	0	0	1	3
2		5	1	#NULL!	#NULL!	#NULL!	#NULL!	#NULL!		2	3	12	2	07860	3	4	1	4	4	4	5	5	5	5	5	5	5	2	1	1	2	3	6	0	0	1	0	0	1	1	0	0	0	0	0	0	0	1	3
2		7	1	#NULL!	#NULL!	#NULL!	#NULL!	#NULL!		2	4	11	2	34481	0	2	0	3	3	2	4	4	4	5	5	5	4	3	3	3	#NULL!	1	5	1	1	1	1	1	1	1	0	0	0	0	0	0	0	1	3
2		4	1	#NULL!	#NULL!	#NULL!	#NULL!	#NULL!		2	4	5	2	27360	3	4	4	4	4	4	5	5	5	5	5	5	5	4	5	5	2	3	6	1	1	1	1	0	1	1	0	0	0	0	0	0	0	1	3
2		3	1	#NULL!	#NULL!	#NULL!	#NULL!	#NULL!		2	5	7	2	34119	1	0	0	2	2	1	4	4	4	4	4	4	4	4	4	4	#NULL!	1	2	1	0	0	0	0	0	0	0	0	0	0	0	0	0	1	3
2		7	1	#NULL!	#NULL!	#NULL!	#NULL!	#NULL!		2	5	3	2	14624	4	4	3	4	3	4	5	4	4	5	5	5	5	2	2	2	2	3	5	1	0	0	0	0	0	0	0	0	0	0	0	0	0	1	3
2		5	1	#NULL!	#NULL!	#NULL!	#NULL!	#NULL!		2	5	12	2	78254	0	0	0	2	0	0	3	3	3	4	4	4	3	3	3	3	2	3	3	0	1	0	0	0	0	0	0	0	0	0	0	0	0	1	3
2		6	1	#NULL!	#NULL!	#NULL!	#NULL!	#NULL!		2	5	10	1	11358	3	2	2	4	4	4	4	4	4	5	5	5	5	4	5	5	1	1	6	1	0	0	0	0	0	0	0	0	0	0	0	0	0	1	3
2		2	1	#NULL!	#NULL!	#NULL!	#NULL!	#NULL!		2	3	8	2	84414	4	4	4	4	4	4	4	1	1	5	5	5	5	5	1	1	2	1	6	1	0	0	0	0	0	0	0	0	0	0	0	0	0	1	3
2		5	1	#NULL!	#NULL!	#NULL!	#NULL!	#NULL!		2	4	11	2	78109	4	3	4	4	3	3	4	4	4	4	4	4	4	5	4	4	#NULL!	3	6	1	1	1	1	1	1	1	0	0	0	0	0	0	0	1	3
2		5	1	#NULL!	#NULL!	#NULL!	#NULL!	#NULL!		2	5	11	2	07066	2	3	2	3	2	2	1	3	4	5	5	5	4	3	3	3	#NULL!	3	5	1	1	0	0	0	0	0	0	0	0	0	0	0	0	1	3
2		7	1	#NULL!	#NULL!	#NULL!	#NULL!	#NULL!		2	2	3	2	46406	0	4	4	4	4	4	5	5	5	5	5	5	5	5	5	5	#NULL!	2	6	1	0	0	0	0	0	0	0	0	0	0	0	0	0	1	3
2		8	1	#NULL!	#NULL!	#NULL!	#NULL!	#NULL!		2	3	6	2	34231	3	3	3	4	3	4	4	4	3	5	5	5	3	2	1	2	#NULL!	3	5	1	0	0	0	0	0	0	0	0	0	0	0	0	0	1	3
2		8	#NULL!	1	#NULL!	#NULL!	#NULL!	#NULL!		2	5	12	2	10530	0	4	0	4	4	4	4	5	3	5	5	5	3	3	3	3	1	2	6	1	0	0	0	0	0	0	0	0	0	0	0	0	0	1	3
2		6	1	#NULL!	#NULL!	#NULL!	#NULL!	#NULL!		2	2	2	2	92065	2	2	1	2	2	2	5	5	5	5	5	5	5	5	5	5	2	4	6	1	1	1	1	1	1	1	0	0	0	0	0	0	0	1	3
2		6	1	#NULL!	#NULL!	#NULL!	#NULL!	#NULL!		2	3	12	2	80002	2	2	1	3	3	1	4	4	3	5	5	5	3	3	2	2	2	4	5	0	1	1	0	0	1	1	0	0	0	0	0	0	0	1	3
2		3	1	#NULL!	#NULL!	#NULL!	#NULL!	#NULL!		2	6	3	2	60544	2	4	4	4	4	4	4	4	4	4	4	4	4	3	3	3	2	5	6	1	0	0	0	0	0	0	0	0	0	0	0	0	0	1	3
2		3	1	#NULL!	#NULL!	#NULL!	#NULL!	#NULL!		2	2	1	1	16101	0	0	0	4	4	0	3	3	3	5	5	5	3	3	3	3	#NULL!	1	6	1	1	1	1	1	1	1	0	0	0	0	0	0	0	1	3
2		6	1	#NULL!	#NULL!	#NULL!	#NULL!	#NULL!		2	5	10	2	32708	3	4	4	4	4	4	5	5	5	1	1	5	5	5	4	5	#NULL!	1	6	0	1	0	0	0	0	0	0	0	0	0	0	0	0	1	3
2		7	#NULL!	1	#NULL!	#NULL!	#NULL!	#NULL!		2	3	8	2	24502	1	4	4	4	4	4	5	5	5	5	5	5	5	4	4	4	2	3	3	1	0	0	0	0	0	0	0	0	0	0	0	0	0	1	3
2		7	1	#NULL!	#NULL!	#NULL!	#NULL!	#NULL!		2	5	11	2	32765	1	3	3	3	3	3	4	4	4	5	5	5	4	4	3	3	2	3	2	1	0	0	0	0	0	0	0	0	0	0	0	0	0	1	3
2		6	1	#NULL!	#NULL!	#NULL!	#NULL!	#NULL!		2	2	1	1	92782	4	4	4	4	4	4	5	5	5	5	5	5	5	5	5	5	#NULL!	3	5	1	0	1	1	0	1	1	0	0	0	0	0	0	0	1	3
2		5	1	#NULL!	#NULL!	#NULL!	#NULL!	#NULL!		2	3	9	2	37042	1	2	1	3	1	3	5	5	4	5	5	5	4	5	4	3	#NULL!	4	5	1	0	0	0	0	0	0	0	0	0	0	0	0	0	1	3
2		5	1	#NULL!	#NULL!	#NULL!	#NULL!	#NULL!		2	5	11	2	13090	3	3	3	4	4	4	5	5	5	5	5	5	4	2	2	2	2	3	5	0	1	0	0	0	1	0	0	1	0	0	0	0	0	0	3
2		4	1	#NULL!	#NULL!	#NULL!	#NULL!	#NULL!		1	3	6	2	75604	3	2	2	4	4	3	2	4	3	4	3	5	3	5	3	3	2	4	6	1	0	0	0	0	0	0	0	1	1	1	1	1	1	0	3
2		3	#NULL!	1	#NULL!	#NULL!	#NULL!	#NULL!		2	6	7	2	70663	4	4	3	4	4	4	3	4	4	1	1	1	3	4	4	4	2	3	6	1	1	1	1	1	1	1	0	0	0	0	0	0	0	1	3
2		4	1	#NULL!	#NULL!	#NULL!	#NULL!	#NULL!		2	4	3	1	03062	4	4	4	4	4	4	3	3	3	3	4	4	3	2	1	1	#NULL!	3	6	1	0	0	0	0	0	0	0	1	0	0	1	0	0	0	3
2		4	1	#NULL!	#NULL!	#NULL!	#NULL!	#NULL!		2	2	2	1	34234	0	2	1	2	2	1	3	3	3	3	3	3	3	3	3	2	2	3	6	1	0	0	0	0	0	0	0	0	0	0	0	0	0	1	3
2		6	1	#NULL!	#NULL!	#NULL!	#NULL!	#NULL!		2	2	9	2	60140	0	0	0	1	0	0	5	5	5	3	3	3	3	3	3	3	#NULL!	4	4	1	0	0	0	0	0	0	0	0	0	0	0	0	0	1	3
2		7	1	#NULL!	#NULL!	#NULL!	#NULL!	#NULL!		2	6	10	1	19152	3	3	3	4	3	3	5	5	5	5	5	5	4	4	4	3	#NULL!	3	5	1	0	0	0	0	0	0	0	0	0	0	0	0	0	1	3
2		3	1	1	#NULL!	#NULL!	#NULL!	#NULL!		1	6	1	2	08080	3	3	4	4	3	4	5	5	5	5	5	5	5	5	5	5	2	3	5	1	0	0	0	0	0	0	0	0	0	0	0	0	0	1	3
2		3	1	#NULL!	#NULL!	#NULL!	#NULL!	#NULL!		2	3	7	1	45449	3	4	4	4	4	4	5	5	5	5	5	5	5	5	5	5	1	1	5	0	1	0	0	0	0	0	0	0	0	0	1	0	1	0	3
2		6	1	#NULL!	#NULL!	#NULL!	#NULL!	#NULL!		2	5	6	2	75201	3	4	4	4	3	4	5	5	5	5	5	5	5	5	4	3	2	3	5	1	0	0	0	0	0	0	0	0	0	0	0	0	0	1	3
2		6	1	#NULL!	#NULL!	#NULL!	#NULL!	#NULL!		2	3	3	2	21017	3	3	1	4	4	2	2	2	2	4	4	4	2	4	3	3	#NULL!	1	5	0	0	1	0	0	1	1	0	0	0	0	0	0	0	1	3
2		4	1	#NULL!	#NULL!	#NULL!	#NULL!	#NULL!		2	5	5	2	29707	4	4	4	4	4	4	3	3	3	5	5	5	5	5	5	3	2	3	6	1	0	0	0	0	0	0	0	0	0	0	0	0	0	1	3
2		7	1	#NULL!	#NULL!	#NULL!	#NULL!	#NULL!		2	3	11	2	44039	2	4	2	4	4	4	5	5	5	5	5	5	4	1	1	1	#NULL!	3	3	0	0	0	1	1	0	0	0	1	1	1	1	0	1	0	3
2		3	#NULL!	#NULL!	#NULL!	1	#NULL!	#NULL!		2	6	9	2	77048	4	4	3	4	4	4	5	5	5	4	5	5	5	5	5	5	#NULL!	4	5	1	0	0	0	0	0	0	0	0	0	0	0	0	0	1	3
2		8	1	#NULL!	#NULL!	#NULL!	#NULL!	#NULL!		2	1	4	2	02302	1	3	3	4	1	1	4	4	3	5	4	5	4	5	4	4	2	3	2	1	0	0	0	0	1	0	0	0	0	0	1	0	1	0	3
2		5	#NULL!	1	#NULL!	#NULL!	#NULL!	#NULL!		2	3	1	2	28311	0	3	3	4	4	2	5	5	5	4	4	4	4	4	3	4	#NULL!	1	6	1	1	1	0	0	1	1	0	0	0	0	0	0	0	1	3
2		5	#NULL!	1	#NULL!	#NULL!	#NULL!	#NULL!		2	2	1	1	33707	0	3	2	4	4	4	5	5	3	5	5	5	5	1	1	1	1	2	1	1	0	0	0	0	0	0	0	0	0	0	0	0	0	1	3
2		5	1	#NULL!	#NULL!	#NULL!	#NULL!	#NULL!		2	3	6	2	86442	2	2	2	3	2	2	3	3	3	4	5	5	4	3	1	3	2	1	6	1	0	1	1	1	1	1	0	0	0	0	0	0	0	1	3
2		4	1	#NULL!	#NULL!	#NULL!	#NULL!	#NULL!		2	5	9	2	48509	3	2	2	4	3	3	5	5	5	5	5	5	5	4	4	3	2	4	1	1	0	0	0	0	0	0	0	0	0	0	0	0	0	1	3
2		5	1	#NULL!	#NULL!	#NULL!	#NULL!	#NULL!		2	2	7	1	38122	3	1	2	4	4	4	5	5	5	5	5	5	5	2	2	2	1	2	6	1	0	0	0	0	0	0	0	0	0	0	0	0	0	1	3
2		7	#NULL!	1	#NULL!	#NULL!	#NULL!	#NULL!		2	5	11	1	44121	2	3	2	3	3	3	4	4	4	3	5	5	4	1	1	2	#NULL!	2	6	1	0	0	0	0	0	0	0	0	0	0	0	0	0	1	3
2		7	1	#NULL!	#NULL!	#NULL!	#NULL!	#NULL!		2	4	4	1	58201	0	4	1	4	4	4	4	4	4	4	4	4	4	3	3	3	#NULL!	3	6	1	0	0	0	0	0	0	0	0	0	0	0	0	0	1	3
2		2	1	#NULL!	#NULL!	#NULL!	#NULL!	#NULL!		2	3	1	1	27559	3	3	2	4	4	3	3	5	2	4	5	5	2	3	2	2	2	5	5	0	0	1	0	1	1	0	0	0	0	0	1	0	1	0	3
2		2	1	#NULL!	#NULL!	#NULL!	#NULL!	#NULL!		2	3	3	1	44135	2	2	2	3	3	3	4	4	3	5	5	5	5	5	5	5	#NULL!	2	5	1	0	0	0	0	0	0	0	0	0	0	0	0	0	1	3
2		7	1	#NULL!	#NULL!	#NULL!	#NULL!	#NULL!		2	4	6	2	15238	3	3	2	4	3	3	5	5	4	5	5	5	5	4	3	3	2	3	6	1	0	0	1	1	1	1	0	0	0	0	0	0	0	1	3
2		7	1	#NULL!	#NULL!	#NULL!	#NULL!	#NULL!		2	4	4	2	33026	4	4	4	4	4	4	4	2	2	5	5	5	3	3	2	2	2	3	5	1	0	0	0	0	0	0	0	0	0	0	0	0	0	1	3
2		4	#NULL!	#NULL!	#NULL!	1	#NULL!	#NULL!		2	5	7	1	60638	3	2	3	4	3	3	5	5	4	5	5	5	5	4	4	4	#NULL!	1	5	1	1	1	1	1	1	1	0	0	0	0	1	0	0	0	3
2		5	1	#NULL!	#NULL!	#NULL!	#NULL!	#NULL!		2	1	1	1	44314	3	3	2	3	4	3	3	4	3	4	5	5	4	3	4	4	#NULL!	1	6	1	0	0	1	1	1	1	0	0	0	0	0	0	0	1	3
2		6	1	#NULL!	#NULL!	#NULL!	#NULL!	#NULL!		2	2	8	1	51103	1	3	0	4	2	0	4	4	5	5	5	5	4	4	3	4	#NULL!	1	6	1	0	0	0	0	0	0	0	0	0	0	0	0	0	1	3
2		7	1	#NULL!	#NULL!	#NULL!	#NULL!	#NULL!		2	3	9	2	33914	4	4	4	4	4	4	5	5	5	5	5	5	5	5	5	3	1	1	2	1	0	0	0	0	0	0	0	0	0	0	0	0	0	1	3
2		7	1	#NULL!	#NULL!	#NULL!	#NULL!	#NULL!		2	6	4	2	72022	2	3	3	2	2	2	4	3	3	5	4	4	3	3	2	2	#NULL!	3	6	0	0	0	0	1	1	0	0	1	0	0	1	0	0	0	3
2		6	1	#NULL!	#NULL!	#NULL!	#NULL!	#NULL!		2	6	11	2	15101	3	3	3	3	3	3	5	2	2	2	2	5	5	1	1	2	1	3	4	1	0	0	0	0	0	0	0	0	0	0	0	0	0	1	3
2		6	1	#NULL!	#NULL!	#NULL!	#NULL!	#NULL!		2	3	6	2	49022	2	4	4	4	4	4	5	3	3	5	5	5	5	5	3	3	#NULL!	1	6	1	0	0	0	0	0	0	0	0	0	0	0	0	0	1	3
2		6	1	1	#NULL!	#NULL!	#NULL!	#NULL!		2	3	3	1	90221	0	1	0	2	2	1	5	4	3	5	5	5	4	5	4	5	#NULL!	1	6	1	0	1	1	0	1	0	0	0	0	0	0	0	0	1	3
2		2	1	#NULL!	#NULL!	#NULL!	#NULL!	#NULL!		2	4	1	2	49120	0	4	0	4	4	4	1	4	1	4	5	5	4	5	5	5	#NULL!	2	5	1	0	0	0	0	0	0	0	0	0	0	0	0	0	1	3
2		7	1	#NULL!	#NULL!	#NULL!	#NULL!	#NULL!		2	2	2	2	33064	0	4	0	4	4	0	5	3	5	5	5	5	5	4	4	4	2	3	5	1	0	0	0	0	0	0	0	0	0	0	0	0	0	1	3
2		4	1	#NULL!	#NULL!	#NULL!	#NULL!	#NULL!		2	6	4	2	99205	4	4	4	4	4	3	1	1	1	3	3	5	1	1	1	1	2	3	5	1	0	0	0	0	0	0	0	0	0	0	0	0	0	1	3
2		6	1	#NULL!	#NULL!	#NULL!	#NULL!	#NULL!		2	3	1	1	34691	0	0	0	4	4	4	1	4	4	5	5	5	5	5	5	5	1	1	6	1	0	1	1	1	1	1	0	0	0	0	0	0	0	1	3
2		7	1	#NULL!	#NULL!	#NULL!	#NULL!	#NULL!		2	3	2	2	60504	4	4	4	4	4	4	4	4	4	4	5	5	5	4	3	3	2	4	6	1	0	0	0	0	0	0	0	0	0	0	0	0	0	1	3
2		7	#NULL!	1	#NULL!	#NULL!	#NULL!	#NULL!		2	6	8	2	77429	1	2	2	2	2	2	5	5	5	5	5	5	5	5	5	4	#NULL!	4	5	0	0	0	0	0	1	0	0	1	0	0	0	0	0	0	3
2		6	1	#NULL!	#NULL!	#NULL!	#NULL!	#NULL!		2	5	8	2	34983	1	1	0	2	1	2	5	5	4	5	5	5	4	3	3	3	2	3	5	1	0	0	0	0	0	0	0	0	0	0	1	0	0	0	3
2		5	#NULL!	1	#NULL!	#NULL!	#NULL!	#NULL!		2	3	3	1	39358	3	3	2	2	2	1	3	3	2	3	4	5	2	5	4	3	#NULL!	1	6	1	0	0	0	0	0	0	0	0	0	0	0	0	0	1	3
2		9	1	#NULL!	#NULL!	#NULL!	#NULL!	#NULL!		2	4	3	2	64116	3	4	4	4	4	4	5	5	5	5	5	5	5	3	3	3	2	3	5	1	0	0	0	0	0	0	0	0	0	0	0	0	0	1	3
2		5	1	#NULL!	#NULL!	#NULL!	#NULL!	#NULL!		2	2	12	2	06451	1	1	0	4	3	3	3	3	3	4	4	4	3	3	3	3	2	3	2	1	0	0	0	0	0	0	0	0	0	0	0	0	0	1	3
2		2	1	#NULL!	#NULL!	#NULL!	#NULL!	#NULL!		2	3	6	1	27596	1	4	1	4	1	3	5	3	3	5	5	5	3	3	2	2	#NULL!	1	5	1	0	0	1	1	1	0	0	0	0	0	1	0	0	0	3
2		4	1	#NULL!	#NULL!	#NULL!	#NULL!	#NULL!		2	6	5	2	48127	3	2	1	4	4	3	5	5	5	5	5	5	5	5	5	5	2	3	5	1	0	0	0	0	0	0	0	0	0	0	0	0	0	1	3
2		7	1	#NULL!	#NULL!	#NULL!	#NULL!	#NULL!		2	3	9	2	32514	0	0	0	4	3	3	5	5	5	5	5	5	5	4	5	5	1	4	6	0	0	1	1	0	1	1	0	0	0	0	0	0	0	1	3
2		6	1	#NULL!	#NULL!	#NULL!	#NULL!	#NULL!		2	4	7	2	60456	4	4	4	4	4	4	5	5	5	5	5	5	5	5	5	5	2	3	5	1	0	0	0	0	0	0	0	0	0	0	0	0	0	1	3
2		5	#NULL!	#NULL!	#NULL!	#NULL!	#NULL!	1	Mixed, race	1	3	10	2	92878	4	2	2	1	1	0	3	3	3	4	4	4	4	4	3	3	#NULL!	3	6	1	1	1	1	1	1	0	0	0	0	0	0	1	0	0	3
2		8	1	#NULL!	#NULL!	#NULL!	#NULL!	#NULL!		2	2	2	2	29708	4	4	4	4	4	4	4	4	4	4	4	4	4	4	2	4	2	3	6	1	0	0	0	0	0	0	0	0	0	0	0	0	0	1	3
2		3	#NULL!	#NULL!	#NULL!	#NULL!	#NULL!	1	Hispanic	1	3	7	2	95742	4	3	4	4	4	4	1	1	1	3	4	4	3	2	2	2	#NULL!	3	6	1	0	0	0	0	0	0	0	0	0	0	0	0	0	1	3
2		7	1	#NULL!	#NULL!	#NULL!	#NULL!	#NULL!		2	5	11	1	10023	2	3	4	4	4	4	5	5	5	5	5	5	5	5	5	5	2	3	5	1	0	0	0	0	0	0	0	0	0	0	0	0	0	1	3
2		8	1	#NULL!	#NULL!	#NULL!	#NULL!	#NULL!		2	3	5	2	60174	1	3	3	4	4	4	5	5	3	5	5	5	5	3	3	3	#NULL!	1	6	1	0	0	1	1	1	0	0	0	0	0	0	0	0	1	3
2		4	1	#NULL!	#NULL!	#NULL!	#NULL!	#NULL!		2	5	10	1	04101	4	4	4	4	3	3	2	2	3	4	5	4	3	4	4	4	2	3	6	1	0	0	0	0	1	0	0	0	0	0	1	0	1	0	3
2		5	1	#NULL!	#NULL!	#NULL!	#NULL!	#NULL!		2	7	11	1	11230	4	3	3	4	4	4	4	4	4	4	4	4	4	4	4	2	2	3	3	0	0	1	0	0	0	0	0	0	0	0	0	0	0	1	3
2		6	1	#NULL!	#NULL!	#NULL!	#NULL!	#NULL!		2	5	2	2	33305	2	2	2	4	3	2	5	5	5	5	5	5	5	4	4	5	2	3	5	1	0	0	0	0	0	0	0	0	0	0	0	0	0	1	3
2		7	1	#NULL!	#NULL!	#NULL!	#NULL!	#NULL!		2	3	4	2	98550	2	3	3	4	3	3	4	4	3	4	4	5	3	3	3	3	2	1	4	1	0	0	0	0	0	0	0	0	0	0	0	0	0	1	3
2		6	1	#NULL!	#NULL!	#NULL!	#NULL!	#NULL!		2	3	3	2	95821	4	4	3	4	4	3	5	3	2	5	5	5	4	4	2	2	2	3	6	1	1	1	1	1	1	1	0	0	0	0	0	0	0	1	3
2		7	1	#NULL!	#NULL!	#NULL!	#NULL!	#NULL!		2	3	2	2	32092	2	4	4	4	4	4	5	4	5	5	5	5	5	4	3	3	2	3	6	1	0	0	0	0	0	0	0	0	0	0	0	0	0	1	3
2		7	1	#NULL!	#NULL!	#NULL!	#NULL!	#NULL!		2	4	4	2	37043	3	4	3	4	4	4	5	5	5	5	5	5	5	1	1	1	#NULL!	1	5	1	0	0	0	0	0	0	0	0	0	0	0	0	0	1	3
2		5	1	#NULL!	#NULL!	#NULL!	#NULL!	#NULL!		2	3	2	2	74128	0	0	0	2	0	0	5	5	5	5	5	5	5	1	1	1	#NULL!	4	5	0	0	0	0	1	1	1	0	1	0	0	1	0	1	0	3
2		7	1	#NULL!	#NULL!	#NULL!	#NULL!	#NULL!		2	2	5	2	06082	1	4	2	4	4	2	4	2	2	5	4	5	3	3	2	2	2	3	5	0	0	1	0	1	1	0	0	0	0	0	0	0	0	1	3
2		4	1	#NULL!	#NULL!	#NULL!	#NULL!	#NULL!		2	6	9	2	03820	2	1	2	4	4	4	3	3	3	4	5	4	4	3	3	3	1	2	5	1	0	0	0	0	0	0	0	0	0	0	0	0	0	1	3
2		4	1	#NULL!	#NULL!	#NULL!	#NULL!	#NULL!		2	1	1	2	43232	1	4	3	4	4	4	5	3	3	5	4	5	4	3	3	3	#NULL!	1	2	1	1	1	1	1	1	1	0	0	0	0	0	0	0	1	3
2		6	#NULL!	1	#NULL!	#NULL!	#NULL!	#NULL!		2	3	4	1	15216	4	4	4	4	1	2	4	4	2	5	5	5	4	2	4	4	2	1	5	1	1	1	0	1	1	0	0	0	0	0	1	0	0	0	3
2		5	1	#NULL!	#NULL!	#NULL!	#NULL!	#NULL!		2	4	6	2	14437	3	4	4	4	4	3	5	5	5	5	5	5	5	4	4	3	2	3	6	1	1	1	1	1	1	1	0	0	0	0	0	0	0	1	3
2		2	1	#NULL!	#NULL!	#NULL!	#NULL!	#NULL!		1	2	3	1	33027	4	4	4	4	4	4	5	5	5	5	5	5	5	5	5	5	2	1	5	0	1	0	1	0	1	1	0	1	0	0	1	0	0	0	3
2		6	1	#NULL!	#NULL!	#NULL!	#NULL!	#NULL!		2	4	9	2	95670	3	3	3	3	3	3	4	4	4	4	4	4	4	3	3	3	2	3	5	0	0	1	0	0	0	0	0	0	0	0	1	0	0	0	3
2		3	1	#NULL!	#NULL!	#NULL!	#NULL!	#NULL!		2	3	6	2	45030	4	4	4	4	3	4	5	5	5	5	5	5	5	5	5	5	#NULL!	3	6	1	0	0	0	0	0	0	0	0	0	0	0	0	0	1	3
2		5	1	#NULL!	#NULL!	#NULL!	#NULL!	#NULL!		2	2	4	1	48060	4	4	4	4	4	0	1	4	4	4	4	4	4	1	1	1	#NULL!	5	1	1	0	0	0	0	0	0	0	0	1	0	0	0	0	0	3
2		6	1	#NULL!	#NULL!	#NULL!	#NULL!	#NULL!		2	2	2	1	10471	4	4	4	4	4	4	5	5	5	5	5	5	5	3	3	3	#NULL!	2	5	1	1	0	0	1	1	1	0	0	0	0	0	0	0	1	3
2		6	1	#NULL!	#NULL!	#NULL!	#NULL!	#NULL!		2	5	11	1	60612	1	1	1	3	3	1	3	3	3	3	5	4	3	3	3	3	2	3	2	1	0	0	0	0	0	0	0	0	0	0	0	0	0	1	3
2		4	#NULL!	1	#NULL!	#NULL!	#NULL!	#NULL!		2	3	12	1	73139	3	2	3	0	0	2	4	3	4	4	5	5	4	4	4	5	#NULL!	3	6	1	1	1	1	1	1	1	0	0	0	0	0	0	0	1	3
2		4	1	#NULL!	#NULL!	#NULL!	#NULL!	#NULL!		2	3	2	1	93277	0	0	0	0	0	0	4	4	4	4	5	5	4	4	4	4	#NULL!	4	6	1	0	0	0	0	0	0	0	0	0	0	0	0	0	1	3
2		3	#NULL!	#NULL!	#NULL!	#NULL!	1	#NULL!		2	5	5	2	77049	1	3	0	4	4	2	4	3	3	5	5	5	4	4	4	4	2	1	5	1	1	0	1	1	1	0	0	0	0	0	1	0	0	0	3
2		6	1	#NULL!	#NULL!	#NULL!	#NULL!	#NULL!		2	2	2	2	08857	0	3	2	4	4	3	5	5	4	5	5	5	5	4	4	4	#NULL!	3	6	1	0	0	0	0	0	0	0	0	0	0	0	0	0	1	3
2		6	1	#NULL!	#NULL!	#NULL!	#NULL!	#NULL!		2	3	11	2	95670	3	3	2	4	4	4	4	4	3	4	5	5	3	2	2	3	#NULL!	3	4	1	0	0	0	0	0	0	0	0	0	0	0	0	0	1	3
2		5	1	#NULL!	#NULL!	1	#NULL!	#NULL!		1	3	4	1	96729	3	2	2	2	2	2	4	4	4	4	4	3	4	3	3	3	#NULL!	1	6	1	0	0	0	0	0	0	0	0	0	0	0	0	0	1	3
2		7	#NULL!	1	#NULL!	#NULL!	#NULL!	#NULL!		2	5	8	1	90044	1	3	1	4	4	1	4	4	3	4	4	4	3	4	4	4	#NULL!	1	5	1	1	1	0	1	1	1	0	1	1	0	0	1	0	0	3
2		7	1	#NULL!	#NULL!	#NULL!	#NULL!	#NULL!		2	3	4	2	46237	0	0	0	4	4	4	5	5	3	5	5	5	3	5	1	1	#NULL!	4	5	1	0	0	0	0	0	0	0	0	0	0	0	0	0	1	3
2		6	1	#NULL!	#NULL!	#NULL!	#NULL!	#NULL!		2	5	5	2	05495	3	4	3	3	3	2	5	4	4	5	5	5	4	5	5	5	2	3	3	0	0	1	0	0	1	1	0	0	0	0	0	0	0	1	3
2		8	#NULL!	1	#NULL!	#NULL!	#NULL!	#NULL!		2	3	4	1	19145	4	4	4	3	2	4	5	5	5	5	5	5	5	5	5	5	#NULL!	4	5	1	1	1	1	1	1	1	0	0	0	0	1	0	0	0	3
2		3	#NULL!	#NULL!	#NULL!	1	1	#NULL!		1	6	6	1	97223	2	2	2	3	3	2	3	3	3	4	4	4	4	4	4	4	#NULL!	3	5	1	0	0	0	0	0	0	0	0	0	0	0	0	0	1	3
2		6	1	#NULL!	#NULL!	#NULL!	#NULL!	#NULL!		2	3	7	1	80011	1	1	1	4	3	0	3	3	3	4	4	4	3	3	3	3	#NULL!	1	1	0	0	1	0	0	0	0	0	1	1	1	1	1	1	0	3
2		5	#NULL!	1	#NULL!	1	#NULL!	#NULL!		2	3	12	1	77057	2	4	4	4	4	4	5	4	4	4	4	4	4	3	3	3	#NULL!	1	5	1	0	0	0	0	0	0	0	0	0	0	0	0	0	1	3
2		4	1	#NULL!	#NULL!	#NULL!	#NULL!	#NULL!		2	5	4	2	78610	3	3	3	4	4	4	4	4	4	5	5	5	5	3	3	3	2	3	5	1	1	1	1	1	1	0	0	0	0	0	1	0	1	0	3
2		3	#NULL!	1	#NULL!	#NULL!	#NULL!	#NULL!		2	2	3	1	45232	3	3	2	4	4	4	4	4	4	5	5	5	5	4	4	4	#NULL!	1	5	1	1	1	1	1	1	1	0	0	0	0	0	0	0	1	3
2		6	1	#NULL!	#NULL!	#NULL!	#NULL!	#NULL!		2	3	4	1	90004	4	2	2	4	2	0	4	4	3	5	5	5	3	3	3	3	2	1	5	1	1	1	1	1	1	1	0	0	0	0	0	0	0	1	3
2		7	1	#NULL!	#NULL!	#NULL!	#NULL!	#NULL!		2	5	9	2	60174	3	4	4	3	2	4	3	3	1	5	5	5	3	1	1	1	2	3	5	1	1	0	0	0	1	0	0	1	0	1	1	1	1	0	3
2		7	#NULL!	1	#NULL!	#NULL!	#NULL!	#NULL!		2	2	2	1	49442	2	2	2	3	3	2	4	4	4	4	4	4	4	4	4	3	2	3	3	1	0	0	0	0	0	0	0	0	0	0	0	0	0	1	3
2		6	1	#NULL!	#NULL!	#NULL!	#NULL!	#NULL!		2	4	11	2	90740	4	4	2	4	4	4	5	4	3	5	5	5	3	1	1	1	1	1	5	1	0	0	0	0	0	0	0	0	0	0	0	0	0	1	3
2		6	1	#NULL!	#NULL!	#NULL!	#NULL!	#NULL!		2	5	10	2	32837	4	4	1	4	4	4	4	4	2	5	5	5	2	2	2	1	2	3	5	1	0	0	0	0	0	0	0	0	0	0	0	0	0	1	3
2		6	1	#NULL!	#NULL!	#NULL!	#NULL!	#NULL!		2	2	6	2	21144	2	4	4	4	4	4	4	4	4	4	4	4	4	4	4	3	#NULL!	2	6	0	1	1	0	0	1	1	0	0	0	0	0	0	0	1	3
2		7	1	#NULL!	#NULL!	#NULL!	#NULL!	#NULL!		2	5	7	2	08628	1	3	1	3	2	1	4	4	4	4	4	4	4	1	1	1	#NULL!	1	5	1	0	0	0	0	0	0	0	0	0	0	0	0	0	1	3
2		6	1	#NULL!	#NULL!	#NULL!	#NULL!	#NULL!		2	2	9	2	19064	3	3	2	4	4	4	5	5	3	5	5	5	3	3	3	3	#NULL!	1	5	1	0	0	0	0	0	0	0	0	0	0	0	0	0	1	3
2		8	1	#NULL!	#NULL!	#NULL!	#NULL!	#NULL!		2	3	7	1	32129	2	2	1	4	4	4	4	4	4	5	5	5	5	5	4	4	#NULL!	1	1	1	0	0	0	0	0	0	0	0	0	0	0	0	0	1	3
2		6	1	#NULL!	#NULL!	#NULL!	#NULL!	#NULL!		2	6	10	2	30721	2	3	2	4	4	4	5	5	5	5	5	5	5	5	5	4	2	1	5	1	0	0	0	0	0	0	0	0	0	0	0	0	0	1	3
2		7	1	#NULL!	#NULL!	#NULL!	#NULL!	#NULL!		2	3	7	2	29449	4	4	4	4	4	4	5	5	5	5	5	5	5	5	5	5	1	1	1	1	0	0	0	0	0	0	0	0	0	0	0	0	0	1	3
2		5	1	#NULL!	#NULL!	#NULL!	#NULL!	#NULL!		2	4	5	2	46060	1	2	0	4	4	4	5	4	3	5	5	5	5	5	4	5	#NULL!	1	5	1	0	0	0	0	0	0	0	0	0	0	0	0	0	1	3
2		6	1	#NULL!	#NULL!	#NULL!	#NULL!	#NULL!		2	4	12	1	55803	4	3	3	4	4	3	4	4	4	5	5	5	5	4	3	2	1	1	6	1	0	0	0	0	0	0	0	0	0	0	0	0	0	1	3
2		5	1	#NULL!	#NULL!	#NULL!	#NULL!	#NULL!		2	3	11	2	14086	0	2	0	4	2	1	5	5	3	5	5	5	5	5	3	5	2	1	6	0	0	0	0	0	1	0	0	0	0	0	1	0	0	0	3
2		5	1	#NULL!	#NULL!	#NULL!	#NULL!	#NULL!		2	3	9	2	48059	4	4	4	4	4	4	5	5	5	5	5	5	4	5	5	5	#NULL!	1	6	1	0	0	1	1	1	1	0	0	0	0	0	0	0	1	3
2		7	1	#NULL!	#NULL!	#NULL!	#NULL!	#NULL!		2	6	11	1	80525	3	4	3	4	2	2	4	4	4	5	4	4	4	4	3	3	2	3	5	1	0	0	0	0	0	0	0	0	0	0	0	0	0	1	3
2		5	1	#NULL!	#NULL!	#NULL!	#NULL!	#NULL!		2	4	12	2	60515	2	3	1	3	3	1	5	5	5	4	5	5	5	5	5	5	#NULL!	1	6	1	0	0	1	0	1	1	0	0	0	0	0	0	0	1	3
2		7	1	#NULL!	#NULL!	#NULL!	#NULL!	#NULL!		2	3	5	2	55311	3	3	1	4	3	3	3	3	1	5	5	5	4	3	3	3	1	4	6	1	0	1	0	0	1	1	0	0	0	0	0	0	0	1	3
2		6	1	#NULL!	#NULL!	#NULL!	#NULL!	#NULL!		2	5	9	2	60502	3	4	3	4	4	4	4	5	3	5	4	5	4	3	3	3	#NULL!	1	5	1	0	0	0	0	0	0	0	0	0	0	0	0	0	1	3
2		3	#NULL!	#NULL!	#NULL!	1	#NULL!	#NULL!		2	4	1	2	60505	3	4	4	4	4	4	5	5	5	5	5	5	5	5	5	5	2	1	5	1	1	1	1	1	1	1	0	0	0	0	1	0	0	0	3
2		6	1	#NULL!	#NULL!	#NULL!	#NULL!	#NULL!		2	4	12	2	45140	0	1	1	4	4	3	5	5	5	5	5	5	5	5	5	5	#NULL!	1	1	0	0	1	0	0	1	0	0	0	0	0	0	0	0	1	3
2		8	1	#NULL!	#NULL!	#NULL!	#NULL!	#NULL!		2	2	3	2	94086	0	0	0	3	3	0	3	3	3	4	4	5	3	2	2	2	2	3	5	1	0	0	0	0	0	0	0	0	0	0	0	0	0	1	3
2		4	#NULL!	#NULL!	#NULL!	#NULL!	#NULL!	1	Mixed	2	4	1	2	32340	2	3	3	4	4	4	5	5	5	5	5	5	5	5	5	5	#NULL!	2	1	1	1	1	1	1	1	1	0	0	0	0	0	0	0	1	3
2		7	1	#NULL!	1	#NULL!	#NULL!	#NULL!		2	6	2	1	87107	4	4	2	4	4	4	4	4	4	4	5	5	4	2	2	2	2	3	5	1	0	0	0	0	0	0	0	1	0	0	1	0	1	0	3
2		7	1	#NULL!	#NULL!	#NULL!	#NULL!	#NULL!		2	3	3	2	28625	3	3	2	3	3	2	5	5	4	5	4	5	4	3	3	3	#NULL!	3	5	1	0	0	0	0	0	0	0	0	0	0	0	0	0	1	3
2		6	1	#NULL!	#NULL!	#NULL!	#NULL!	#NULL!		2	5	11	2	93722	3	3	2	3	3	3	4	4	4	5	5	5	5	3	3	3	#NULL!	3	2	1	0	0	0	0	0	0	0	0	0	0	0	0	0	1	3
2		6	1	#NULL!	#NULL!	#NULL!	#NULL!	#NULL!		2	3	9	2	54311	0	0	0	2	1	0	5	5	5	5	5	5	5	5	5	5	2	3	5	1	0	0	0	0	0	0	0	0	0	0	0	0	0	1	3
2		6	1	#NULL!	#NULL!	#NULL!	#NULL!	#NULL!		2	4	4	2	70510	2	2	2	2	2	2	4	4	4	4	4	4	4	3	2	3	2	3	5	1	1	1	1	1	1	1	0	0	0	0	0	0	0	1	3
2		7	#NULL!	#NULL!	#NULL!	#NULL!	#NULL!	1	Eurasian	2	5	3	2	96789	3	4	4	4	4	3	5	5	5	5	5	5	5	5	5	5	2	1	6	0	1	0	1	1	1	1	0	0	0	0	0	0	0	1	3
2		5	1	#NULL!	#NULL!	#NULL!	#NULL!	#NULL!		2	5	11	2	17543	1	1	0	4	1	1	3	3	3	5	4	5	3	3	3	3	#NULL!	1	5	1	0	0	0	0	0	0	0	0	0	0	0	0	0	1	3
2		6	1	#NULL!	#NULL!	#NULL!	#NULL!	#NULL!		2	2	6	2	48335	1	2	2	4	4	4	5	5	5	5	5	5	5	1	1	1	#NULL!	3	5	1	0	0	0	0	0	0	0	0	0	0	0	0	0	1	3
2		6	1	#NULL!	#NULL!	#NULL!	#NULL!	#NULL!		2	3	12	2	22508	0	0	0	4	4	4	4	3	3	5	5	5	3	3	1	3	2	3	6	1	0	0	0	0	0	0	0	0	0	0	0	0	0	1	3
2		6	1	#NULL!	#NULL!	#NULL!	#NULL!	#NULL!		2	5	11	2	39208	2	4	1	4	4	4	1	1	1	4	4	4	1	1	1	1	#NULL!	3	6	1	0	0	0	0	0	0	0	0	0	0	1	0	0	0	3
2		4	1	#NULL!	#NULL!	#NULL!	#NULL!	#NULL!		2	6	11	2	44641	2	3	2	4	3	2	5	5	5	5	5	5	5	5	5	5	2	3	5	1	0	0	0	0	0	0	0	0	0	0	0	0	0	1	3
2		2	1	#NULL!	#NULL!	#NULL!	#NULL!	#NULL!		2	4	3	2	31082	0	0	0	4	3	2	3	3	3	4	4	4	4	2	2	1	#NULL!	3	5	1	0	0	0	0	0	0	0	0	0	0	0	0	0	1	3
2		6	1	#NULL!	#NULL!	#NULL!	#NULL!	#NULL!		2	6	6	2	85204	3	4	3	4	4	4	5	5	5	5	5	5	5	5	5	1	#NULL!	1	5	1	0	0	0	0	0	0	0	0	0	0	0	0	0	1	3
2		4	1	#NULL!	#NULL!	#NULL!	#NULL!	#NULL!		2	2	4	2	95822	4	4	4	4	4	4	3	5	5	5	5	5	5	5	5	5	#NULL!	1	6	1	1	1	1	1	1	1	0	0	0	0	0	0	0	1	3
2		4	1	#NULL!	#NULL!	#NULL!	#NULL!	#NULL!		2	3	5	2	07663	3	4	3	4	4	3	4	4	3	5	5	5	4	4	4	4	#NULL!	3	6	1	0	0	0	0	0	0	0	0	0	0	0	0	0	1	3
2		6	1	#NULL!	#NULL!	#NULL!	#NULL!	#NULL!		2	3	4	2	55313	4	4	3	4	4	4	5	5	5	5	5	5	5	5	4	4	2	3	6	1	1	1	1	1	1	1	0	0	0	0	1	0	1	0	3
2		4	1	#NULL!	#NULL!	#NULL!	#NULL!	#NULL!		2	3	10	1	06053	2	1	2	4	4	3	4	4	4	4	4	4	4	3	3	2	2	1	2	1	0	0	0	0	0	0	0	0	0	0	0	0	0	1	3
2		7	1	#NULL!	#NULL!	#NULL!	#NULL!	#NULL!		2	3	6	2	29577	3	3	0	4	4	4	1	5	3	5	5	5	4	2	3	3	#NULL!	1	6	1	0	0	0	0	0	0	0	0	0	0	0	0	0	1	3
2		7	1	#NULL!	#NULL!	#NULL!	#NULL!	#NULL!		2	4	3	2	07840	0	4	1	4	4	4	4	4	4	5	5	5	5	4	4	4	#NULL!	1	6	1	0	0	1	1	1	1	0	0	0	0	0	0	0	1	3
2		6	1	#NULL!	#NULL!	#NULL!	#NULL!	#NULL!		1	4	4	2	92308	2	1	0	4	4	0	3	1	4	5	5	5	5	5	5	5	#NULL!	1	3	1	1	1	1	1	1	1	0	0	0	0	0	0	0	1	3
2		7	1	#NULL!	#NULL!	#NULL!	#NULL!	#NULL!		2	6	10	1	40962	1	2	1	3	3	2	5	5	5	5	5	5	5	5	5	5	#NULL!	1	5	1	1	1	1	1	1	1	0	0	0	0	0	0	0	1	3
2		4	#NULL!	1	#NULL!	#NULL!	#NULL!	#NULL!		2	2	2	1	21613	4	4	4	4	4	4	2	4	2	5	5	5	2	4	4	4	#NULL!	1	1	1	0	0	0	0	0	0	0	1	0	0	0	0	0	0	3
2		9	1	#NULL!	#NULL!	#NULL!	#NULL!	#NULL!		2	2	12	2	11803	2	2	1	3	3	3	4	4	4	4	4	4	4	4	4	3	2	2	6	1	0	0	0	0	0	0	0	0	0	0	0	0	0	1	3
2		7	1	#NULL!	#NULL!	#NULL!	#NULL!	#NULL!		2	6	2	2	97203	3	3	3	4	3	2	5	4	3	5	5	5	5	5	5	4	1	5	6	1	0	0	0	0	0	0	0	1	1	1	1	1	1	0	3
2		3	1	#NULL!	#NULL!	#NULL!	#NULL!	#NULL!		2	4	4	2	60016	0	0	0	1	0	0	3	3	2	3	4	4	3	2	2	2	#NULL!	2	6	1	1	1	1	1	1	1	0	0	0	0	1	0	0	0	3
2		7	1	#NULL!	#NULL!	#NULL!	#NULL!	#NULL!		2	3	5	2	32904	1	4	1	4	4	4	5	5	5	5	5	5	5	5	5	5	2	3	5	1	1	1	1	1	1	1	0	0	0	0	0	0	0	1	3
2		3	#NULL!	1	#NULL!	#NULL!	#NULL!	#NULL!		1	5	8	2	11510	4	3	2	4	1	2	5	4	4	4	5	5	4	5	5	5	#NULL!	1	6	1	0	1	1	1	1	1	0	0	0	0	0	0	0	1	3
2		7	1	#NULL!	#NULL!	#NULL!	#NULL!	#NULL!		2	6	9	2	30127	2	3	2	3	2	2	5	5	3	4	4	4	3	2	2	2	#NULL!	2	5	0	1	0	0	0	0	0	0	0	0	0	1	0	0	0	3
2		7	1	#NULL!	#NULL!	#NULL!	#NULL!	#NULL!		2	2	4	2	54935	2	3	1	4	3	3	4	4	4	3	4	3	4	3	3	3	#NULL!	3	5	1	0	0	0	0	0	0	0	0	0	0	1	0	0	0	3
2		3	1	#NULL!	#NULL!	#NULL!	#NULL!	#NULL!		2	3	3	2	27513	3	4	2	4	4	4	2	2	2	4	5	4	5	2	2	3	#NULL!	3	6	1	0	0	0	0	0	0	0	0	0	0	0	0	0	1	3
2		7	1	#NULL!	#NULL!	#NULL!	#NULL!	#NULL!		2	5	6	1	85308	3	3	3	4	4	4	4	4	4	5	5	5	4	4	4	4	2	1	5	1	0	0	0	0	0	0	0	0	0	0	0	0	0	1	3
2		7	1	#NULL!	#NULL!	#NULL!	#NULL!	#NULL!		2	4	7	2	92620	3	3	3	4	4	4	4	4	3	5	5	5	4	3	3	3	#NULL!	5	6	0	1	0	0	0	0	0	0	0	0	0	0	0	0	1	3
2		4	1	#NULL!	#NULL!	#NULL!	#NULL!	#NULL!		2	3	9	2	60506	2	3	2	3	3	3	4	4	4	4	4	4	3	3	3	3	1	2	1	1	0	0	0	0	0	0	0	0	0	0	0	0	0	1	3
2		8	1	#NULL!	#NULL!	#NULL!	#NULL!	#NULL!		2	3	8	2	60707	4	4	3	4	3	3	5	5	5	5	5	5	5	5	3	4	1	4	1	1	0	0	0	0	0	0	0	0	0	0	0	0	0	1	3
2		7	#NULL!	#NULL!	#NULL!	1	#NULL!	#NULL!		2	6	11	1	94602	4	4	4	4	4	4	5	5	5	5	5	5	5	4	4	3	2	3	5	1	1	1	1	1	1	1	0	0	0	0	0	0	0	1	3
2		6	1	#NULL!	#NULL!	#NULL!	#NULL!	#NULL!		2	5	8	2	02653	2	4	4	4	4	4	1	1	1	5	5	5	1	1	1	1	2	3	5	1	0	0	0	0	0	0	0	0	0	0	0	0	0	1	3
2		4	1	#NULL!	#NULL!	#NULL!	#NULL!	#NULL!		2	3	5	2	27958	2	2	2	2	2	2	5	5	5	5	5	5	5	5	5	3	#NULL!	4	3	1	0	0	0	0	0	0	0	0	0	1	0	0	0	0	3
2		6	1	#NULL!	#NULL!	#NULL!	#NULL!	#NULL!		2	4	1	2	44683	3	0	0	4	3	3	3	3	3	3	4	4	3	3	3	3	#NULL!	1	5	1	0	1	0	1	1	1	0	0	0	0	0	0	0	1	3
2		4	#NULL!	1	#NULL!	#NULL!	#NULL!	#NULL!		2	5	10	1	01603	2	2	2	2	2	2	5	5	5	5	5	5	5	5	5	5	#NULL!	4	4	1	1	1	0	0	0	1	0	0	0	0	0	0	0	1	3
2		2	1	#NULL!	#NULL!	#NULL!	#NULL!	#NULL!		2	2	9	2	99141	2	0	3	4	3	4	5	4	5	5	5	5	5	1	1	1	#NULL!	1	5	1	0	0	0	0	0	0	0	0	0	0	0	0	0	1	3
2		6	1	#NULL!	#NULL!	#NULL!	#NULL!	#NULL!		2	6	11	2	73099	4	4	4	4	3	4	4	2	2	5	5	5	5	2	2	2	2	3	5	1	0	0	0	0	0	0	0	0	0	0	1	0	0	0	3
2		7	1	#NULL!	#NULL!	#NULL!	#NULL!	#NULL!		2	6	8	1	91206	3	3	3	4	4	2	3	3	3	5	5	5	3	3	3	3	#NULL!	2	5	0	1	1	0	0	0	0	0	0	0	0	0	0	0	1	3
2		6	1	#NULL!	#NULL!	#NULL!	#NULL!	#NULL!		2	3	2	1	42101	4	4	4	4	3	0	3	4	3	4	5	5	3	3	3	4	2	3	5	1	0	0	0	0	0	0	0	0	0	0	0	0	0	1	3
2		6	1	#NULL!	#NULL!	#NULL!	#NULL!	#NULL!		2	3	6	1	32459	4	4	4	4	4	4	5	5	5	5	5	5	5	5	5	5	2	3	6	0	0	0	1	0	0	0	0	0	0	0	0	0	0	1	3
2		7	1	#NULL!	#NULL!	#NULL!	#NULL!	#NULL!		2	3	3	2	97225	3	3	0	4	3	3	5	5	5	5	5	5	5	5	5	3	#NULL!	3	6	0	0	1	1	0	0	0	0	1	0	0	0	1	0	0	3
2		4	1	#NULL!	#NULL!	#NULL!	#NULL!	#NULL!		2	4	1	1	44111	2	4	3	4	4	2	2	4	4	4	4	4	2	4	4	4	#NULL!	1	5	1	0	1	0	0	1	1	0	0	0	0	0	0	0	1	3
2		6	1	#NULL!	#NULL!	#NULL!	#NULL!	#NULL!		2	5	12	2	14226	0	0	0	0	0	0	1	1	1	3	3	3	3	3	3	3	2	3	2	1	0	0	0	0	0	0	0	0	0	0	0	0	0	1	3
2		6	1	#NULL!	#NULL!	#NULL!	#NULL!	#NULL!		2	2	2	2	47203	1	3	3	3	2	1	5	5	5	5	5	5	5	5	5	5	#NULL!	1	6	1	0	1	0	0	0	0	0	0	0	0	0	0	0	1	3
2		6	1	#NULL!	#NULL!	#NULL!	#NULL!	#NULL!		2	5	4	1	60631	3	3	3	4	3	3	4	4	3	4	5	5	4	2	2	2	#NULL!	2	5	1	0	0	0	0	0	0	0	0	0	0	0	0	0	1	3
2		5	1	#NULL!	#NULL!	#NULL!	#NULL!	#NULL!		2	5	4	2	94583	2	2	2	3	1	1	3	3	3	4	4	4	3	3	3	3	2	3	5	1	0	0	0	0	0	0	0	0	0	0	1	0	1	0	3
2		5	1	#NULL!	#NULL!	#NULL!	#NULL!	#NULL!		2	2	2	1	46947	2	4	3	4	4	4	5	5	5	5	5	5	5	5	5	5	#NULL!	4	6	1	0	0	0	0	0	0	0	0	0	0	0	0	0	1	3
2		4	1	#NULL!	#NULL!	#NULL!	#NULL!	#NULL!		2	3	9	1	68164	1	1	2	3	3	2	3	3	3	4	4	4	4	3	3	3	2	1	1	1	0	0	0	0	0	0	0	0	0	0	0	0	0	1	3
2		6	#NULL!	#NULL!	#NULL!	#NULL!	#NULL!	1	hispana	1	5	1	1	79924	0	0	0	0	0	0	1	1	1	1	1	1	1	1	1	1	#NULL!	1	6	1	0	0	0	0	0	0	0	0	0	0	0	0	0	1	3
2		4	#NULL!	#NULL!	#NULL!	1	#NULL!	#NULL!		2	5	11	1	95747	3	3	3	3	3	3	5	5	4	4	5	5	4	5	5	5	2	3	4	0	1	0	0	1	0	0	0	0	0	0	0	0	0	1	3
2		6	1	#NULL!	#NULL!	#NULL!	#NULL!	#NULL!		2	4	8	2	42122	3	4	3	4	4	4	5	5	5	5	5	5	5	3	3	3	2	3	5	1	0	0	0	0	0	0	0	0	0	0	0	0	0	1	3
2		8	1	#NULL!	#NULL!	#NULL!	#NULL!	#NULL!		2	6	3	2	60007	4	4	4	4	4	3	5	4	3	5	5	5	4	2	2	2	#NULL!	1	6	1	0	0	0	0	0	0	0	0	0	0	0	0	0	1	3
2		6	#NULL!	1	#NULL!	#NULL!	#NULL!	#NULL!		2	5	11	2	19901	2	2	2	4	4	3	1	4	4	4	4	5	3	4	3	4	2	1	6	1	0	0	0	1	1	1	0	0	0	0	0	0	0	1	3
2		6	1	#NULL!	#NULL!	#NULL!	#NULL!	#NULL!		2	5	4	1	85021	3	2	1	3	2	1	4	4	4	4	5	5	4	4	3	3	#NULL!	1	6	1	0	0	0	0	0	0	0	0	0	0	0	0	0	1	3
2		6	1	#NULL!	#NULL!	#NULL!	#NULL!	#NULL!		2	2	1	1	45801	3	2	1	4	4	4	3	2	2	3	4	4	3	3	2	3	2	3	5	1	1	0	0	0	0	0	0	0	0	0	1	0	0	0	3
2		5	1	#NULL!	#NULL!	#NULL!	#NULL!	#NULL!		2	4	1	2	33706	3	3	3	2	2	1	4	4	3	4	5	4	3	4	4	4	2	3	6	1	1	1	1	1	1	1	0	0	0	0	0	0	0	1	3
2		4	#NULL!	#NULL!	#NULL!	1	#NULL!	#NULL!		2	6	7	2	32746	1	3	1	4	4	1	4	4	4	5	5	4	4	2	4	4	2	3	4	1	0	0	0	0	0	0	0	1	0	0	0	0	0	0	3
2		6	1	#NULL!	#NULL!	#NULL!	#NULL!	#NULL!		2	2	6	2	08021	3	3	0	3	3	3	4	3	4	3	4	4	3	3	2	2	1	1	6	0	0	1	0	0	1	0	0	0	0	0	1	0	1	0	3
2		6	1	#NULL!	#NULL!	#NULL!	#NULL!	#NULL!		2	6	11	2	74021	3	3	1	4	4	4	4	4	3	4	4	4	3	3	3	3	#NULL!	2	1	1	0	0	0	0	0	0	0	0	0	0	0	0	0	1	3
2		2	1	#NULL!	#NULL!	#NULL!	#NULL!	#NULL!		2	2	3	2	36852	4	3	2	3	2	3	5	5	4	5	5	5	5	4	3	2	#NULL!	2	6	1	1	1	1	1	1	1	0	0	0	0	0	0	0	1	3
2		7	1	#NULL!	#NULL!	#NULL!	#NULL!	#NULL!		2	6	10	1	33606	2	3	3	3	3	3	5	5	4	5	5	5	5	4	4	4	2	1	5	1	0	0	0	0	0	0	0	0	0	0	0	0	0	1	3
2		4	1	#NULL!	#NULL!	#NULL!	#NULL!	#NULL!		2	3	4	2	76179	1	2	4	4	4	4	5	5	5	5	5	5	5	5	5	5	2	3	6	1	0	0	0	0	1	0	0	0	0	0	0	0	0	1	3
2		6	1	#NULL!	#NULL!	#NULL!	#NULL!	#NULL!		2	5	7	2	37918	2	3	2	3	3	2	4	4	4	4	5	5	4	3	4	3	2	3	1	1	0	0	0	0	0	0	0	0	0	0	0	0	0	1	3
2		6	1	#NULL!	#NULL!	#NULL!	#NULL!	#NULL!		2	4	11	2	23455	4	4	4	4	4	4	2	2	2	4	4	4	2	2	2	2	#NULL!	2	5	0	0	1	0	0	1	0	0	0	0	0	0	0	0	1	3
2		6	1	#NULL!	#NULL!	#NULL!	#NULL!	#NULL!		2	5	2	1	97215	3	4	4	4	3	4	4	4	3	4	4	4	4	4	4	4	2	3	5	1	1	1	1	1	1	0	0	0	0	0	1	0	1	0	3
2		6	#NULL!	#NULL!	1	#NULL!	#NULL!	#NULL!		1	4	3	1	80226	3	3	2	3	2	1	5	5	5	5	5	4	4	2	2	3	#NULL!	2	4	1	0	0	0	0	0	0	0	0	0	0	0	0	0	1	3
2		9	1	#NULL!	#NULL!	#NULL!	#NULL!	#NULL!		2	3	5	2	77384	4	4	3	4	2	4	5	4	3	5	5	5	3	2	2	2	#NULL!	1	5	1	0	0	0	0	0	0	0	0	0	1	0	0	0	0	3
2		8	#NULL!	#NULL!	#NULL!	1	#NULL!	#NULL!		2	4	6	2	60714	3	3	3	4	4	3	5	5	5	4	4	4	4	1	1	1	2	1	5	1	0	0	0	0	0	0	0	0	0	0	0	0	0	1	3
2		3	1	#NULL!	#NULL!	#NULL!	#NULL!	#NULL!		2	5	9	2	43615	1	3	2	4	4	4	4	3	3	4	4	4	3	3	3	3	2	1	5	1	0	0	0	0	0	0	0	0	1	1	1	0	1	0	3
2		5	1	#NULL!	#NULL!	#NULL!	#NULL!	#NULL!		1	3	11	2	10965	1	1	1	1	1	1	1	1	1	1	1	1	1	5	5	5	2	4	5	1	0	0	0	0	0	0	0	0	0	0	0	0	0	1	3
2		7	#NULL!	1	#NULL!	#NULL!	#NULL!	#NULL!		2	6	7	2	77346	2	2	3	4	4	3	5	5	5	4	4	4	4	4	4	4	1	1	6	1	0	0	0	0	0	0	0	0	0	0	0	0	0	1	3
2		3	1	#NULL!	#NULL!	#NULL!	#NULL!	#NULL!		2	5	4	2	30605	1	2	2	3	2	1	3	3	3	4	5	5	3	3	3	3	2	3	5	1	0	0	0	0	0	0	0	0	0	0	0	0	0	1	3
2		4	1	#NULL!	#NULL!	#NULL!	#NULL!	#NULL!		2	4	6	2	67216	1	1	1	4	4	4	1	3	1	1	3	1	1	4	4	5	#NULL!	1	6	1	0	0	0	0	0	0	0	0	0	0	0	0	0	1	3
2		6	#NULL!	1	#NULL!	#NULL!	#NULL!	#NULL!		2	1	1	1	60660	2	4	3	4	3	4	5	5	3	5	4	5	5	3	4	2	#NULL!	5	3	0	0	1	0	0	1	0	0	1	0	0	1	0	0	0	3
2		8	1	#NULL!	#NULL!	#NULL!	#NULL!	#NULL!		2	3	11	2	29223	3	4	3	4	4	4	5	5	4	5	5	5	3	4	4	4	2	3	5	1	0	0	0	0	0	0	0	0	0	0	0	0	0	1	3
2		8	1	#NULL!	#NULL!	#NULL!	#NULL!	#NULL!		2	2	3	2	13212	4	4	4	4	4	4	1	5	3	5	5	5	5	5	5	5	#NULL!	1	4	1	1	1	1	1	1	1	0	0	0	0	0	0	0	1	3
2		8	1	#NULL!	#NULL!	#NULL!	#NULL!	#NULL!		2	6	4	1	85203	4	4	4	4	4	4	5	3	4	5	5	4	3	4	4	3	1	1	5	1	0	0	0	0	0	0	0	0	0	0	0	0	0	1	3
2		4	1	1	1	#NULL!	#NULL!	#NULL!		1	1	1	1	34748	0	4	0	2	0	1	3	4	4	4	4	4	4	4	4	4	#NULL!	1	2	1	0	0	0	0	0	0	0	0	0	0	0	0	0	1	3
2		7	1	#NULL!	#NULL!	#NULL!	#NULL!	#NULL!		2	4	4	1	58501	4	4	4	4	4	4	5	5	5	5	5	5	5	5	5	5	1	1	6	1	0	0	0	0	0	0	0	0	0	0	0	0	0	1	3
2		5	#NULL!	#NULL!	#NULL!	#NULL!	#NULL!	1	prefer not to answer	2	4	7	2	77591	0	0	0	3	3	0	5	5	5	5	5	5	5	5	1	1	#NULL!	3	5	0	0	1	1	0	1	1	0	0	0	0	0	0	0	1	3
2		6	1	#NULL!	#NULL!	#NULL!	#NULL!	#NULL!		2	5	2	2	44095	3	3	3	1	1	1	3	3	3	4	4	4	3	3	3	3	2	3	5	1	0	0	0	0	0	0	0	0	0	0	0	0	0	1	3
2		3	1	#NULL!	#NULL!	#NULL!	#NULL!	#NULL!		2	3	3	1	67211	2	3	1	3	3	1	4	4	4	4	4	4	4	3	4	4	2	3	5	0	1	1	0	1	1	0	0	1	0	1	1	0	0	0	3
2		6	1	#NULL!	#NULL!	#NULL!	#NULL!	#NULL!		2	3	2	2	30121	0	0	0	2	1	0	4	4	4	4	4	5	4	4	4	4	2	1	6	1	1	1	1	1	1	1	0	0	0	0	0	0	0	1	3
2		4	1	#NULL!	#NULL!	#NULL!	#NULL!	#NULL!		2	2	2	2	38134	3	4	3	4	4	4	4	4	3	5	5	5	3	4	4	4	2	5	1	0	1	0	0	0	0	0	0	1	0	0	1	0	0	0	3
2		6	1	#NULL!	#NULL!	#NULL!	#NULL!	#NULL!		2	3	10	1	98178	3	3	3	4	4	4	4	4	4	4	4	4	4	4	4	3	2	3	5	1	0	0	0	0	0	0	0	0	0	0	0	0	0	1	3
2		5	1	#NULL!	#NULL!	#NULL!	#NULL!	#NULL!		2	2	1	1	74133	3	4	3	4	4	4	5	5	5	5	5	5	3	3	3	3	#NULL!	4	1	1	0	0	0	0	0	0	0	0	0	0	0	0	0	1	3
2		6	1	#NULL!	#NULL!	#NULL!	#NULL!	#NULL!		2	6	11	2	22033	2	3	3	4	4	4	3	3	3	5	5	5	3	3	3	3	2	3	5	0	1	0	0	0	0	0	0	0	0	0	1	0	0	0	3
2		6	1	#NULL!	#NULL!	#NULL!	#NULL!	#NULL!		2	3	2	2	32117	0	4	2	4	4	2	5	5	3	3	5	3	2	1	1	1	#NULL!	2	5	1	0	0	0	0	0	0	0	0	0	0	0	0	0	1	3
2		6	1	#NULL!	#NULL!	#NULL!	#NULL!	#NULL!		2	5	6	2	08826	3	3	2	3	3	2	2	2	3	5	5	5	3	3	4	4	#NULL!	1	5	1	0	0	0	0	0	0	0	0	0	0	0	0	0	1	3
2		7	1	#NULL!	#NULL!	#NULL!	#NULL!	#NULL!		2	4	4	2	98037	2	1	1	2	2	2	4	4	3	4	4	4	3	3	3	3	#NULL!	2	6	1	0	0	0	0	0	0	0	0	0	0	0	0	0	1	3
2		7	1	#NULL!	#NULL!	#NULL!	#NULL!	#NULL!		2	2	9	2	58103	0	1	0	2	0	2	5	5	5	3	5	5	4	3	3	3	#NULL!	1	5	1	0	0	0	0	1	0	0	0	0	0	0	0	0	1	3
2		5	1	#NULL!	#NULL!	#NULL!	#NULL!	#NULL!		2	5	3	2	33321	0	3	2	4	3	3	4	4	3	4	5	4	3	3	3	3	#NULL!	2	6	1	1	0	0	0	0	0	0	0	0	0	0	0	0	1	3
2		7	1	#NULL!	#NULL!	#NULL!	#NULL!	#NULL!		2	5	6	1	91208	4	4	4	4	4	4	3	3	3	4	4	4	3	3	3	3	2	3	6	1	0	0	0	0	0	0	0	0	0	0	0	0	0	1	3
2		6	1	#NULL!	#NULL!	#NULL!	#NULL!	#NULL!		2	2	2	1	63111	2	3	3	4	4	4	5	5	3	5	5	5	5	5	5	5	#NULL!	4	6	1	0	0	0	0	0	0	0	0	0	0	0	0	0	1	3
2		5	1	#NULL!	#NULL!	#NULL!	#NULL!	#NULL!		2	3	7	2	07040	3	3	3	4	3	2	3	3	3	5	5	5	4	1	1	1	2	3	5	1	1	1	1	1	1	1	0	0	0	0	1	0	0	0	3
2		7	1	#NULL!	#NULL!	#NULL!	#NULL!	#NULL!		2	3	3	2	13039	2	4	4	4	2	3	1	1	3	1	1	1	1	1	1	1	2	1	5	1	0	1	1	1	1	1	0	0	0	0	0	0	0	1	3
2		6	1	#NULL!	#NULL!	#NULL!	#NULL!	#NULL!		2	3	5	2	44070	2	2	0	4	4	3	4	4	4	3	5	5	4	3	4	3	2	3	6	1	1	1	1	0	1	1	0	0	0	0	0	0	0	1	3
2		6	1	#NULL!	#NULL!	#NULL!	#NULL!	#NULL!		2	5	3	1	87107	3	3	3	4	4	3	3	3	3	4	5	4	3	3	3	3	#NULL!	1	5	1	0	1	0	0	0	0	0	0	0	0	0	0	0	1	3
2		6	1	#NULL!	#NULL!	#NULL!	#NULL!	#NULL!		2	2	7	1	14207	0	1	1	3	3	2	4	4	3	3	4	4	3	3	2	2	#NULL!	1	5	0	0	1	0	0	0	0	0	0	0	0	0	0	0	1	3
2		7	1	#NULL!	#NULL!	#NULL!	#NULL!	#NULL!		2	4	6	2	85142	2	2	0	4	2	2	4	4	4	5	4	5	4	3	3	3	2	1	4	1	0	0	0	0	0	0	0	0	0	0	0	0	0	1	3
2		5	1	#NULL!	#NULL!	#NULL!	#NULL!	#NULL!		2	2	3	2	34653	2	3	2	3	3	2	3	3	3	5	4	5	4	3	3	3	#NULL!	1	6	1	0	0	0	0	0	0	0	0	0	0	1	0	0	0	3
2		6	1	#NULL!	#NULL!	#NULL!	#NULL!	#NULL!		2	1	3	2	49548	2	3	2	3	3	2	4	4	4	4	4	4	4	4	3	3	#NULL!	3	2	0	0	0	0	1	0	0	0	0	0	0	0	0	0	1	3
2		7	1	#NULL!	#NULL!	#NULL!	#NULL!	#NULL!		2	4	5	2	32257	0	2	0	4	4	4	5	5	5	5	5	5	5	5	5	3	#NULL!	3	5	1	0	0	0	0	0	0	0	0	0	0	0	0	0	1	3
2		4	1	#NULL!	#NULL!	#NULL!	#NULL!	#NULL!		2	4	11	2	21236	3	3	3	4	1	1	4	4	4	4	4	4	4	3	3	3	2	3	2	0	0	0	0	0	1	0	0	0	0	0	0	0	0	1	3
2		6	#NULL!	1	#NULL!	#NULL!	#NULL!	#NULL!		2	4	4	2	92506	4	4	4	4	4	4	4	4	4	5	5	5	5	5	5	4	#NULL!	1	6	1	0	0	0	0	0	0	0	0	0	0	0	0	0	1	3
2		6	1	#NULL!	#NULL!	#NULL!	#NULL!	#NULL!		2	3	9	2	43015	3	3	2	4	3	4	3	2	2	5	4	5	2	3	2	1	1	1	6	0	1	0	0	0	0	0	0	0	0	0	1	0	1	0	3
2		6	1	#NULL!	#NULL!	#NULL!	#NULL!	#NULL!		2	6	12	2	02492	4	4	4	4	4	4	5	3	3	5	5	5	5	2	2	1	2	3	5	1	0	0	0	1	1	0	0	0	0	0	1	0	1	0	3
2		5	1	#NULL!	#NULL!	#NULL!	#NULL!	#NULL!		2	6	12	2	43035	3	3	3	3	3	3	5	3	3	5	5	5	3	1	1	1	2	1	6	1	0	0	0	0	0	0	0	0	0	0	1	0	0	0	3
2		7	1	#NULL!	#NULL!	#NULL!	#NULL!	#NULL!		2	5	8	2	52404	0	3	3	3	3	3	4	4	4	4	4	4	4	2	2	2	1	2	1	1	0	0	0	0	0	0	0	0	0	0	1	0	0	0	3
2		4	1	#NULL!	#NULL!	#NULL!	#NULL!	#NULL!		2	5	7	2	91607	2	2	2	4	2	2	5	5	5	5	5	5	4	5	4	4	1	1	5	1	1	1	1	1	1	1	0	0	0	0	0	0	0	1	3
2		7	1	#NULL!	#NULL!	#NULL!	#NULL!	#NULL!		2	5	7	2	43054	4	4	4	4	4	4	5	4	4	5	5	5	5	4	2	2	2	3	6	1	0	1	0	0	1	1	0	0	0	0	0	0	0	1	3
2		6	#NULL!	1	#NULL!	#NULL!	#NULL!	#NULL!		2	4	4	2	25064	2	2	2	3	3	3	3	3	3	4	5	5	3	3	3	3	2	3	6	1	0	0	0	0	0	0	0	0	0	0	0	0	0	1	3
2		6	1	#NULL!	#NULL!	#NULL!	#NULL!	#NULL!		2	4	6	1	61114	4	4	4	4	4	4	1	5	3	5	5	5	5	1	1	1	2	1	6	1	0	0	0	0	0	0	0	0	0	0	0	0	0	1	3
2		4	#NULL!	1	#NULL!	#NULL!	#NULL!	#NULL!		2	1	1	1	72202	4	4	4	4	3	4	5	5	3	1	1	1	3	5	5	5	1	1	5	1	0	0	0	0	0	0	0	0	0	0	0	0	0	1	3
2		7	1	#NULL!	1	#NULL!	#NULL!	#NULL!		2	2	7	2	75074	3	3	3	4	4	4	5	4	3	5	5	5	4	3	2	3	#NULL!	3	5	1	0	0	0	0	0	0	0	0	0	0	0	0	0	1	3
2		5	1	#NULL!	#NULL!	#NULL!	#NULL!	#NULL!		2	5	8	1	79912	4	4	4	4	4	3	5	5	5	5	5	5	5	5	5	5	2	3	3	1	0	1	0	0	1	0	0	0	0	0	0	0	0	1	3
2		7	#NULL!	1	#NULL!	#NULL!	#NULL!	#NULL!		2	4	5	2	38127	3	4	4	4	4	4	4	4	4	4	4	4	4	4	4	4	#NULL!	4	6	1	1	1	1	1	1	1	0	0	0	0	0	0	0	1	3
2		7	1	#NULL!	#NULL!	#NULL!	#NULL!	#NULL!		1	3	10	1	33134	4	4	2	4	4	4	5	5	5	5	5	5	5	4	4	4	1	4	5	1	0	0	0	0	0	0	0	0	0	0	0	0	0	1	3
2		8	1	#NULL!	#NULL!	#NULL!	#NULL!	#NULL!		2	2	5	1	97214	4	4	2	4	3	3	5	5	5	5	5	5	5	5	4	4	2	3	5	1	1	1	1	1	1	1	0	0	0	0	0	0	0	1	3
2		4	1	#NULL!	#NULL!	#NULL!	#NULL!	#NULL!		2	5	12	2	11793	2	3	2	4	3	3	5	5	3	5	5	5	5	4	2	2	2	3	5	0	1	1	0	0	0	0	0	1	0	0	0	0	0	0	3
2		5	1	#NULL!	#NULL!	#NULL!	#NULL!	#NULL!		2	6	8	2	06320	2	3	4	4	3	3	4	4	3	5	5	5	3	3	3	3	2	3	5	1	0	0	0	1	1	0	0	0	0	0	0	0	0	1	3
2		5	1	#NULL!	#NULL!	#NULL!	#NULL!	#NULL!		2	6	10	2	01702	3	4	4	4	4	4	5	3	3	5	5	5	5	5	3	3	#NULL!	3	6	1	0	0	0	0	0	0	0	0	0	0	0	0	0	1	3
2		4	1	#NULL!	#NULL!	#NULL!	#NULL!	#NULL!		2	3	1	1	48910	4	3	4	4	4	2	3	4	5	5	5	5	5	5	5	5	#NULL!	3	6	1	0	0	0	0	0	0	0	0	0	0	0	0	0	1	3
2		6	1	#NULL!	#NULL!	#NULL!	#NULL!	#NULL!		2	3	4	2	21740	4	4	3	4	4	4	5	4	2	5	4	5	4	2	2	1	#NULL!	1	5	1	0	0	0	0	0	0	0	0	0	0	0	0	0	1	3
2		8	1	#NULL!	#NULL!	#NULL!	#NULL!	#NULL!		2	2	5	1	89104	2	2	1	3	2	2	2	3	3	4	4	4	3	3	3	3	#NULL!	1	5	0	0	0	0	0	0	1	0	0	0	0	0	0	0	1	3
2		4	#NULL!	1	#NULL!	#NULL!	#NULL!	#NULL!		2	3	6	1	23224	1	4	4	4	4	4	5	5	5	5	5	5	5	5	5	5	2	3	5	1	1	1	1	1	1	1	0	0	0	0	0	0	0	1	3
2		5	1	#NULL!	1	#NULL!	#NULL!	#NULL!		2	5	5	2	74948	4	4	4	4	4	4	5	5	5	5	5	5	3	5	3	3	2	3	5	1	0	0	0	0	0	0	0	0	0	0	0	0	0	1	3
2		5	1	#NULL!	#NULL!	#NULL!	#NULL!	#NULL!		2	4	5	2	92081	3	3	2	4	4	4	3	3	3	4	5	5	3	3	3	3	2	3	5	1	0	0	0	0	0	0	0	0	0	0	0	0	0	1	3
2		6	1	#NULL!	#NULL!	#NULL!	#NULL!	#NULL!		2	4	9	2	29414	1	3	2	3	3	3	4	4	4	4	4	5	4	4	4	4	#NULL!	1	6	1	0	0	0	0	0	0	0	0	0	0	0	0	0	1	3
2		6	1	#NULL!	#NULL!	#NULL!	#NULL!	#NULL!		2	5	6	2	29707	0	4	3	4	3	4	4	4	2	5	5	5	2	3	3	3	2	3	5	0	0	1	0	0	0	0	0	0	0	0	0	0	0	1	3
2		7	#NULL!	1	#NULL!	#NULL!	#NULL!	#NULL!		2	4	2	1	68104	2	2	2	4	4	4	3	3	3	5	5	5	3	3	3	3	1	1	3	1	0	0	0	0	0	0	0	0	0	0	0	0	0	1	3
2		7	1	#NULL!	#NULL!	#NULL!	#NULL!	#NULL!		2	3	5	2	33837	0	0	4	4	4	4	5	5	5	5	5	5	5	4	4	4	#NULL!	3	6	1	0	0	0	0	0	0	0	0	0	0	0	0	0	1	3
2		8	1	#NULL!	#NULL!	#NULL!	#NULL!	#NULL!		2	6	7	2	66049	2	3	1	3	3	2	3	5	3	5	5	5	5	3	1	3	2	3	5	1	1	1	0	1	0	0	0	0	0	0	1	0	1	0	3
2		6	1	#NULL!	#NULL!	#NULL!	#NULL!	#NULL!		2	4	5	1	74112	4	4	4	4	4	4	4	3	3	5	5	5	3	1	2	1	2	3	5	1	0	0	0	0	0	0	0	0	0	0	0	0	0	1	3
2		6	1	#NULL!	#NULL!	#NULL!	#NULL!	#NULL!		2	1	8	2	98498	4	4	0	4	0	0	5	5	5	5	5	5	5	5	5	1	2	3	2	1	0	0	0	0	0	0	0	0	0	0	1	0	0	0	3
2		7	1	#NULL!	#NULL!	#NULL!	#NULL!	#NULL!		2	3	3	2	97229	3	3	3	4	3	4	5	5	5	5	4	5	4	3	3	3	#NULL!	3	5	1	0	0	0	0	0	0	0	0	0	0	0	0	0	1	3
2		7	1	#NULL!	#NULL!	#NULL!	#NULL!	#NULL!		2	2	2	2	77099	4	3	0	4	3	3	3	3	3	5	5	5	5	4	4	5	2	3	5	1	1	1	1	1	1	1	0	0	0	0	0	0	0	1	3
2		6	1	#NULL!	#NULL!	#NULL!	#NULL!	#NULL!		2	4	5	2	85616	2	3	1	4	4	4	3	2	2	4	4	4	3	2	2	2	#NULL!	1	5	1	0	0	0	1	1	0	0	0	0	0	0	0	0	1	3
2		3	#NULL!	1	#NULL!	#NULL!	#NULL!	#NULL!		2	6	5	1	55411	3	2	1	4	2	3	4	3	3	5	5	5	5	2	4	4	#NULL!	1	5	1	0	0	0	0	0	0	0	1	0	0	1	0	0	0	3
2		7	1	#NULL!	#NULL!	#NULL!	#NULL!	#NULL!		2	6	7	2	84067	3	4	0	4	4	4	3	3	3	4	4	4	3	2	2	2	#NULL!	1	5	1	0	0	0	0	0	0	0	0	0	0	0	0	0	1	3
2		7	#NULL!	1	#NULL!	#NULL!	#NULL!	#NULL!		2	5	6	2	75672	4	4	4	4	4	4	5	4	4	4	5	5	4	5	5	5	2	3	5	1	1	1	1	1	1	1	0	0	0	0	0	0	0	1	3
2		3	1	#NULL!	#NULL!	#NULL!	#NULL!	#NULL!		2	3	3	2	02703	2	3	1	4	4	4	5	5	5	5	5	5	5	5	5	5	#NULL!	3	5	1	1	1	1	1	1	1	0	1	1	1	1	1	1	0	3
2		4	#NULL!	1	#NULL!	#NULL!	#NULL!	#NULL!		2	3	4	1	64109	2	3	3	2	3	2	5	3	5	3	3	3	3	3	3	4	#NULL!	4	6	1	0	0	0	0	0	0	0	1	0	0	0	1	0	0	3
2		8	1	#NULL!	#NULL!	#NULL!	#NULL!	#NULL!		2	3	5	2	95409	4	4	4	4	2	2	4	3	3	5	5	5	3	3	2	1	2	3	5	1	0	0	0	0	0	0	0	0	0	0	0	0	0	1	3
2		5	1	#NULL!	#NULL!	#NULL!	#NULL!	#NULL!		2	2	2	1	95136	4	4	4	4	4	4	4	4	4	5	5	5	3	4	4	4	#NULL!	1	6	1	1	1	1	1	1	1	0	0	0	0	0	0	0	1	3
2		5	#NULL!	#NULL!	#NULL!	#NULL!	#NULL!	1	Hispanic	1	1	2	1	75208	0	0	0	4	0	0	1	1	3	1	1	1	1	4	4	5	1	4	1	1	0	0	0	0	0	0	0	0	0	0	0	0	0	1	3
2		6	#NULL!	1	#NULL!	#NULL!	#NULL!	#NULL!		2	4	11	1	60639	3	4	3	4	4	4	3	3	3	4	5	5	4	3	3	3	2	4	6	1	0	0	0	0	0	0	0	0	0	0	0	0	0	1	3
2		4	1	#NULL!	#NULL!	#NULL!	#NULL!	#NULL!		2	4	8	2	98208	2	3	2	4	4	2	5	5	5	5	5	5	5	5	5	5	#NULL!	4	6	1	1	1	1	1	1	1	0	0	0	0	1	0	0	0	3
2		4	1	#NULL!	#NULL!	#NULL!	#NULL!	#NULL!		2	3	6	2	78681	2	2	3	4	1	0	3	4	2	4	5	5	5	4	2	3	2	3	6	1	0	0	0	0	0	0	0	0	0	0	0	0	0	1	3
2		7	#NULL!	#NULL!	1	#NULL!	#NULL!	#NULL!		1	5	3	1	87508	3	4	4	4	4	3	4	4	4	4	4	4	5	4	4	4	2	1	6	1	0	1	0	0	0	0	0	0	0	0	0	0	0	1	3
2		4	1	#NULL!	#NULL!	#NULL!	#NULL!	#NULL!		2	3	1	2	28562	0	2	0	3	0	0	2	4	4	2	4	4	2	1	1	4	#NULL!	3	5	1	0	0	1	0	1	0	0	0	0	0	0	0	0	1	3
2		6	1	#NULL!	#NULL!	#NULL!	#NULL!	#NULL!		2	5	12	2	08620	2	2	2	2	2	2	4	4	4	4	4	4	4	3	3	3	#NULL!	3	6	1	0	0	0	0	0	0	0	0	0	0	0	0	0	1	3
2		6	1	#NULL!	#NULL!	#NULL!	#NULL!	#NULL!		2	5	10	2	80016	0	1	0	3	1	1	4	3	3	5	5	4	5	4	2	3	2	1	6	1	0	0	0	0	0	0	0	0	0	0	0	0	0	1	3
2		8	1	#NULL!	#NULL!	#NULL!	#NULL!	#NULL!		2	4	10	2	21619	4	3	4	4	4	4	4	4	3	4	5	5	4	2	2	1	1	1	6	1	0	0	0	0	0	0	0	0	0	0	0	0	0	1	3
2		3	1	#NULL!	#NULL!	#NULL!	#NULL!	#NULL!		2	3	6	2	37043	2	2	0	2	2	0	1	1	1	5	5	5	5	5	1	3	#NULL!	3	5	1	0	0	0	0	0	0	0	0	0	0	0	0	0	1	3
2		5	1	#NULL!	#NULL!	#NULL!	#NULL!	#NULL!		2	5	11	2	34202	3	3	3	4	4	4	3	3	3	3	4	4	3	3	3	3	2	1	5	0	0	1	0	0	0	0	0	0	0	0	1	0	0	0	3
2		7	1	#NULL!	#NULL!	#NULL!	#NULL!	#NULL!		2	5	11	1	48341	2	3	2	4	4	3	4	4	3	4	5	5	3	2	2	2	#NULL!	2	6	1	0	0	0	0	0	0	0	0	0	0	0	0	0	1	3
2		6	1	#NULL!	#NULL!	#NULL!	#NULL!	#NULL!		2	3	5	2	97219	3	3	3	4	3	4	5	5	5	4	4	5	3	4	4	4	#NULL!	5	5	0	1	0	0	1	1	0	0	1	1	1	1	1	1	0	3
2		8	1	#NULL!	#NULL!	#NULL!	#NULL!	#NULL!		2	3	12	2	95121	4	4	2	4	4	4	5	5	5	5	5	5	5	5	5	5	#NULL!	3	3	1	0	0	0	0	0	0	0	0	0	0	0	0	0	1	3
2		3	1	#NULL!	#NULL!	#NULL!	#NULL!	#NULL!		2	6	11	2	68007	2	2	1	4	3	3	3	4	2	5	4	5	3	3	3	3	#NULL!	1	1	0	0	1	0	0	0	0	0	0	0	0	0	0	0	1	3
2		5	1	#NULL!	#NULL!	#NULL!	#NULL!	#NULL!		1	1	2	2	35811	2	2	2	2	2	2	5	5	5	5	5	5	3	3	3	3	#NULL!	2	5	1	0	0	0	0	0	0	0	0	0	0	0	0	0	1	3
2		3	#NULL!	1	#NULL!	#NULL!	#NULL!	#NULL!		2	5	3	2	29445	3	4	4	4	4	3	5	3	3	5	5	5	3	5	2	2	#NULL!	3	5	1	0	0	0	0	0	0	0	0	0	0	0	0	0	1	3
2		6	#NULL!	1	#NULL!	#NULL!	#NULL!	#NULL!		2	3	2	1	30134	0	4	0	4	4	4	5	5	5	5	5	5	5	5	1	1	#NULL!	3	6	1	0	0	0	0	0	0	0	0	0	0	0	0	0	1	3
2		6	1	#NULL!	#NULL!	#NULL!	#NULL!	#NULL!		2	5	1	2	01850	3	4	2	4	4	4	5	5	3	5	5	5	3	4	3	3	2	3	6	1	0	0	0	0	0	0	0	0	0	0	1	0	0	0	3
2		6	1	#NULL!	#NULL!	#NULL!	#NULL!	#NULL!		2	2	2	1	17046	0	0	0	4	0	0	5	4	5	4	4	5	4	2	1	2	#NULL!	4	1	0	1	0	0	0	0	0	0	0	0	0	0	0	0	1	3
2		5	1	#NULL!	#NULL!	#NULL!	#NULL!	#NULL!		2	4	4	1	78209	2	2	2	4	4	4	5	5	5	5	5	5	5	3	3	3	2	1	6	1	0	0	0	0	0	0	0	0	0	0	0	0	0	1	3
2		4	1	#NULL!	#NULL!	#NULL!	#NULL!	#NULL!		2	5	11	2	21228	0	0	0	0	0	0	4	4	4	4	4	4	4	3	3	3	#NULL!	2	6	1	0	0	0	0	0	0	0	0	0	0	0	0	0	1	3
2		7	1	#NULL!	#NULL!	#NULL!	#NULL!	#NULL!		1	4	11	2	23464	4	4	4	4	4	4	5	5	4	5	5	5	5	5	5	5	2	1	5	1	0	0	0	0	0	0	0	0	0	0	0	1	0	0	3
2		6	1	#NULL!	#NULL!	#NULL!	#NULL!	#NULL!		2	5	4	1	90042	2	1	0	4	3	1	4	3	3	4	5	5	3	3	3	3	2	3	6	1	0	0	0	0	0	0	0	0	0	1	1	0	1	0	3
2		5	#NULL!	1	#NULL!	#NULL!	#NULL!	#NULL!		2	2	1	2	75215	4	4	0	4	4	0	5	5	5	5	5	5	5	1	1	1	1	1	1	1	0	0	0	0	0	0	0	0	0	0	0	0	0	1	3
2		6	1	#NULL!	#NULL!	#NULL!	#NULL!	#NULL!		2	2	8	2	32405	3	4	3	4	4	4	3	3	3	4	4	4	3	2	2	2	2	3	6	0	0	0	0	0	1	0	0	0	0	0	1	0	0	0	3
2		3	#NULL!	1	#NULL!	#NULL!	#NULL!	#NULL!		2	2	1	2	21202	4	2	3	2	1	3	5	3	4	5	3	5	4	4	3	4	2	3	2	1	0	0	0	0	0	0	0	0	0	0	0	0	0	1	3
2		7	1	#NULL!	#NULL!	#NULL!	#NULL!	#NULL!		2	4	6	2	46835	1	3	2	4	3	3	4	4	4	5	5	5	5	4	4	4	#NULL!	1	5	1	0	0	0	0	0	0	0	0	0	0	0	0	0	1	3
2		8	1	#NULL!	#NULL!	#NULL!	#NULL!	#NULL!		2	6	9	2	85375	3	4	1	4	4	1	4	4	4	5	5	5	4	4	4	5	#NULL!	3	5	1	0	0	0	1	1	1	0	0	0	0	0	0	0	1	3
2		8	1	#NULL!	#NULL!	#NULL!	#NULL!	#NULL!		2	3	5	2	30815	0	4	4	4	4	4	4	1	2	4	4	3	2	2	2	1	#NULL!	1	6	0	0	0	0	1	0	0	0	1	0	1	1	0	1	0	3
2		7	1	#NULL!	#NULL!	#NULL!	#NULL!	#NULL!		2	5	7	2	27519	2	2	0	3	1	2	4	3	3	4	4	4	3	3	2	1	2	3	6	1	0	0	0	0	0	0	0	0	0	0	0	0	0	1	3
2		6	#NULL!	#NULL!	#NULL!	1	#NULL!	#NULL!		2	3	1	1	11229	0	0	0	4	0	0	5	5	5	5	5	5	5	5	5	5	#NULL!	3	5	1	1	1	1	1	1	1	0	0	0	0	0	0	0	1	3
2		6	1	#NULL!	#NULL!	#NULL!	#NULL!	#NULL!		2	6	12	2	20724	3	4	3	4	3	3	4	4	3	5	5	5	4	4	3	3	2	3	5	0	0	1	1	1	1	0	0	0	0	0	1	0	0	0	3
2		5	1	#NULL!	#NULL!	#NULL!	#NULL!	#NULL!		2	5	6	1	03063	3	3	4	4	4	4	5	5	5	4	4	5	5	5	5	5	2	1	5	1	0	0	0	0	0	0	0	0	1	0	1	0	0	0	3
2		7	1	#NULL!	#NULL!	#NULL!	#NULL!	#NULL!		2	2	3	2	68133	0	0	0	2	0	2	4	4	4	4	4	4	4	4	4	4	#NULL!	1	5	1	0	0	0	0	0	0	0	0	0	0	0	0	0	1	3
2		6	1	#NULL!	#NULL!	#NULL!	#NULL!	#NULL!		1	2	4	2	76543	2	3	3	4	4	4	5	3	5	5	5	5	5	4	3	3	1	1	5	1	0	0	0	0	0	0	0	0	0	0	0	0	0	1	3
2		6	1	#NULL!	#NULL!	#NULL!	#NULL!	#NULL!		2	4	3	2	16105	0	2	1	4	4	4	4	4	3	4	4	4	4	4	4	4	#NULL!	3	6	1	0	0	0	0	0	0	0	0	0	0	0	0	0	1	3
2		7	1	#NULL!	#NULL!	#NULL!	#NULL!	#NULL!		2	3	5	2	55901	2	2	3	4	4	3	5	5	4	5	5	5	4	4	3	3	#NULL!	4	5	1	0	0	0	0	0	0	0	0	0	0	0	0	0	1	3
2		5	#NULL!	#NULL!	#NULL!	#NULL!	#NULL!	1		1	5	7	1	02907	3	3	3	3	3	3	3	3	3	4	4	4	4	4	4	5	2	3	5	1	0	0	0	0	0	0	0	0	0	0	1	0	0	0	3
2		8	1	#NULL!	#NULL!	#NULL!	#NULL!	#NULL!		2	2	6	2	85653	2	1	1	3	2	1	5	5	5	3	5	5	4	4	4	4	#NULL!	3	5	1	1	1	1	1	1	1	0	0	0	0	0	0	0	1	3
2		7	1	#NULL!	#NULL!	#NULL!	#NULL!	#NULL!		2	4	8	1	95818	4	4	4	4	3	3	5	5	5	5	5	5	5	3	3	3	2	3	5	1	1	1	1	1	1	1	0	0	0	0	0	0	0	1	3
2		3	#NULL!	#NULL!	#NULL!	1	#NULL!	#NULL!		2	6	11	1	11230	3	4	3	4	4	3	2	1	1	5	5	5	4	2	1	1	2	1	5	1	0	0	0	0	0	0	0	0	0	0	0	0	0	1	3
2		6	1	#NULL!	#NULL!	#NULL!	#NULL!	#NULL!		2	2	2	2	33578	0	3	0	3	3	0	4	4	4	4	5	4	3	4	4	4	#NULL!	1	5	1	1	1	1	1	1	1	0	0	0	0	0	0	0	1	3
2		7	#NULL!	1	#NULL!	#NULL!	#NULL!	#NULL!		2	2	3	2	11427	3	0	0	3	4	4	4	4	4	5	5	5	3	5	4	5	1	1	6	1	1	1	0	1	1	1	0	0	0	0	0	0	0	1	3
2		6	#NULL!	1	#NULL!	#NULL!	#NULL!	#NULL!		2	4	2	1	62269	0	3	2	3	3	3	4	4	4	4	4	4	4	4	4	5	#NULL!	2	5	1	0	1	1	1	1	1	0	0	0	0	0	0	0	1	3
2		5	1	#NULL!	#NULL!	#NULL!	#NULL!	#NULL!		2	4	12	2	84088	2	3	3	4	3	4	5	5	5	5	5	5	5	4	4	4	#NULL!	1	5	1	0	0	0	0	0	0	0	0	0	0	1	0	0	0	3
2		6	1	#NULL!	#NULL!	#NULL!	#NULL!	#NULL!		2	5	10	2	31029	4	4	4	4	4	4	5	5	5	5	5	5	5	5	4	4	2	3	5	0	1	0	0	0	0	0	0	0	0	0	1	0	0	0	3
2		6	1	#NULL!	#NULL!	#NULL!	#NULL!	#NULL!		1	5	11	2	33029	0	0	0	3	2	0	5	5	5	5	5	5	5	5	5	5	#NULL!	3	6	1	1	1	1	1	1	1	0	0	0	0	0	0	0	1	3
2		6	1	#NULL!	#NULL!	#NULL!	#NULL!	#NULL!		2	5	1	2	45150	3	3	3	4	4	3	5	2	2	5	5	5	5	3	2	2	2	3	5	1	1	0	0	0	1	0	0	0	0	0	1	0	1	0	3
2		4	1	#NULL!	#NULL!	#NULL!	#NULL!	#NULL!		2	3	4	1	65804	2	4	2	4	4	4	4	4	4	5	5	5	4	5	5	4	#NULL!	3	5	1	0	0	0	0	0	0	0	0	0	0	0	0	0	1	3
2		3	#NULL!	1	#NULL!	#NULL!	#NULL!	#NULL!		2	5	11	2	28213	1	3	1	4	3	3	3	2	2	4	4	5	3	2	1	1	#NULL!	3	6	1	0	0	0	0	0	0	0	0	0	0	0	0	0	1	3
2		7	1	#NULL!	#NULL!	#NULL!	#NULL!	#NULL!		2	2	8	2	33805	4	4	2	4	4	2	5	1	1	5	5	5	5	5	5	5	#NULL!	3	1	1	0	1	1	0	1	1	0	0	0	0	0	0	0	1	3
2		5	#NULL!	1	#NULL!	#NULL!	#NULL!	#NULL!		2	2	8	2	45211	4	4	4	4	4	4	2	2	3	5	5	5	2	2	2	2	2	1	3	1	1	1	1	1	1	1	0	0	0	0	0	0	0	1	3
2		7	1	#NULL!	#NULL!	#NULL!	#NULL!	#NULL!		2	2	6	1	19136	4	4	4	4	4	4	4	4	4	4	5	5	3	3	4	4	#NULL!	1	1	1	1	1	1	1	1	1	0	0	0	0	0	0	0	1	3
2		7	1	#NULL!	#NULL!	#NULL!	#NULL!	#NULL!		2	4	7	2	34135	1	4	2	3	3	3	5	5	4	2	5	5	2	2	2	2	1	4	1	1	0	0	0	0	0	0	0	0	0	0	0	0	0	1	3
2		6	1	#NULL!	#NULL!	#NULL!	#NULL!	#NULL!		2	2	3	1	70634	0	0	0	4	3	4	5	4	4	5	5	4	5	4	4	4	1	1	6	1	0	0	0	0	0	0	0	0	0	0	0	0	0	1	3
2		5	1	#NULL!	#NULL!	1	1	#NULL!		2	6	3	2	96721	2	3	2	4	3	2	5	5	5	5	5	5	5	5	5	5	#NULL!	1	6	1	0	0	0	0	0	0	0	0	0	0	0	0	0	1	3
2		5	1	#NULL!	#NULL!	#NULL!	#NULL!	#NULL!		2	2	1	2	08016	0	4	0	3	0	0	5	5	4	5	5	5	4	3	3	2	2	3	5	1	1	1	1	1	1	1	0	0	0	0	0	0	0	1	3
2		3	1	#NULL!	#NULL!	#NULL!	#NULL!	#NULL!		2	3	3	1	80909	1	2	3	4	3	3	4	3	3	5	5	5	4	3	3	3	#NULL!	2	5	1	1	0	0	0	0	0	0	0	0	0	1	0	1	0	3
2		6	1	#NULL!	#NULL!	#NULL!	#NULL!	#NULL!		2	2	9	2	52761	4	4	4	4	4	4	5	4	5	3	5	5	4	3	4	3	2	3	6	1	0	0	0	0	0	0	0	0	0	0	0	0	0	1	3
2		8	1	#NULL!	#NULL!	#NULL!	#NULL!	#NULL!		1	2	2	2	88001	4	4	4	4	4	4	4	3	4	5	4	5	5	4	4	4	#NULL!	1	6	1	0	0	0	0	0	0	0	0	0	0	0	0	0	1	3
2		6	#NULL!	1	#NULL!	#NULL!	#NULL!	#NULL!		2	2	6	1	11226	1	1	1	2	2	1	3	3	3	1	1	1	1	5	5	5	#NULL!	1	6	1	0	0	0	0	0	0	0	0	0	0	0	0	0	1	3
2		7	1	#NULL!	#NULL!	#NULL!	#NULL!	#NULL!		2	5	11	2	07094	4	4	4	4	4	4	5	5	3	5	5	5	5	4	1	4	2	3	1	1	0	0	0	0	0	0	0	0	0	0	0	0	0	1	3
2		7	1	#NULL!	#NULL!	#NULL!	#NULL!	#NULL!		2	6	12	2	10704	2	2	2	3	3	3	4	4	4	5	5	4	4	5	4	4	#NULL!	1	5	1	0	0	0	0	0	0	0	0	0	0	0	0	0	1	3
2		4	1	#NULL!	#NULL!	#NULL!	#NULL!	#NULL!		2	5	12	1	75229	0	1	0	4	4	4	5	5	5	5	5	5	5	3	4	4	#NULL!	1	5	1	0	0	0	0	0	0	0	0	0	0	0	0	0	1	3
2		6	1	#NULL!	#NULL!	#NULL!	#NULL!	#NULL!		2	3	4	1	76137	4	4	2	4	4	4	4	4	2	5	5	5	2	1	1	1	2	3	5	0	0	0	0	1	1	0	0	0	0	0	1	0	0	0	3
2		5	1	#NULL!	#NULL!	#NULL!	#NULL!	#NULL!		2	6	12	2	60067	3	4	3	4	4	4	4	4	4	4	4	4	4	1	1	1	2	3	5	0	1	0	0	0	0	0	0	0	0	0	1	0	1	0	3
2		7	1	#NULL!	#NULL!	#NULL!	#NULL!	#NULL!		2	2	4	2	79118	2	1	1	1	1	1	5	5	5	5	5	5	5	5	5	5	1	1	5	1	0	0	0	0	0	0	0	0	0	0	0	0	0	1	3
2		7	#NULL!	1	#NULL!	#NULL!	#NULL!	#NULL!		2	3	1	1	11213	4	4	0	4	4	4	5	5	5	5	5	5	5	5	5	5	#NULL!	1	6	1	0	0	0	0	0	0	0	0	0	0	0	0	0	1	3
2		7	1	#NULL!	#NULL!	#NULL!	#NULL!	#NULL!		1	2	6	2	77802	0	0	0	3	0	0	2	4	1	4	5	4	4	3	3	2	1	2	5	0	0	1	0	0	1	1	0	0	0	0	0	0	0	1	3
2		6	1	#NULL!	#NULL!	#NULL!	#NULL!	#NULL!		2	5	5	2	17055	4	4	4	4	4	4	4	4	3	5	5	5	4	2	2	3	2	3	2	1	0	0	0	0	0	0	0	0	0	0	0	0	0	1	3
2		8	1	#NULL!	#NULL!	#NULL!	#NULL!	#NULL!		2	3	10	2	48315	3	4	4	4	4	4	5	5	5	5	5	5	5	5	5	5	2	3	6	1	1	1	1	1	1	1	0	0	0	0	0	0	0	1	3
2		5	1	#NULL!	#NULL!	#NULL!	#NULL!	#NULL!		2	4	3	2	53150	3	3	2	4	3	2	4	4	4	5	5	5	4	4	4	4	#NULL!	1	5	1	0	0	0	0	0	0	0	0	0	0	0	0	0	1	3
2		7	1	#NULL!	#NULL!	#NULL!	#NULL!	#NULL!		1	7	4	1	32224	4	4	4	4	4	4	5	5	5	5	5	5	5	5	5	5	#NULL!	1	6	1	0	0	0	0	0	0	0	0	0	0	0	0	0	1	3
2		5	1	#NULL!	#NULL!	#NULL!	#NULL!	#NULL!		2	2	3	1	62703	3	4	2	4	3	4	5	5	1	5	5	5	5	5	3	3	#NULL!	1	5	1	0	0	0	0	0	0	0	0	0	0	0	0	0	1	3
2		6	1	#NULL!	#NULL!	#NULL!	#NULL!	#NULL!		1	2	3	1	78840	2	2	0	4	4	4	2	2	2	3	5	4	2	1	1	4	#NULL!	4	5	0	0	1	0	0	0	0	0	1	0	0	0	1	0	0	3
2		3	#NULL!	#NULL!	#NULL!	#NULL!	#NULL!	1		2	3	1	1	23453	0	4	1	1	1	1	1	1	1	4	1	1	1	4	1	4	2	5	3	0	0	1	0	0	0	0	0	0	0	0	0	0	0	1	3
2		7	1	#NULL!	#NULL!	#NULL!	#NULL!	#NULL!		2	4	6	2	75072	4	4	4	4	3	3	5	4	4	4	5	5	5	4	4	3	2	3	5	1	1	1	1	1	1	1	0	0	0	0	0	0	0	1	3
2		7	#NULL!	#NULL!	1	#NULL!	#NULL!	#NULL!		2	3	7	1	99508	1	2	0	1	1	1	3	3	3	3	5	5	3	3	3	3	1	1	5	0	0	1	0	0	0	0	0	0	0	0	1	0	0	0	3
2		6	#NULL!	1	#NULL!	#NULL!	#NULL!	#NULL!		2	3	4	2	35226	2	4	4	4	3	4	2	2	2	3	3	3	2	2	2	1	2	3	2	1	0	0	0	0	0	0	0	0	0	0	0	1	0	0	3
2		6	1	#NULL!	#NULL!	#NULL!	#NULL!	#NULL!		2	3	2	1	33764	3	2	1	4	3	2	4	4	4	5	5	5	5	3	3	3	#NULL!	1	5	1	1	1	1	0	1	1	0	0	0	0	0	0	0	1	3
2		7	1	#NULL!	#NULL!	#NULL!	#NULL!	#NULL!		2	4	8	2	34491	4	4	4	4	4	4	3	3	3	4	5	5	3	2	1	3	2	3	6	1	0	0	0	0	0	0	0	0	0	0	0	0	0	1	3
2		7	1	#NULL!	#NULL!	#NULL!	#NULL!	#NULL!		2	3	6	1	40241	0	2	2	4	3	4	5	5	5	5	5	5	5	3	3	3	#NULL!	2	5	1	1	1	1	1	1	1	0	0	0	0	0	0	0	1	3
2		5	1	#NULL!	#NULL!	#NULL!	#NULL!	#NULL!		2	5	6	1	54914	2	3	3	3	3	3	4	4	4	4	4	4	4	4	4	3	2	3	5	0	1	0	1	0	0	0	0	1	0	0	0	0	0	0	3
2		2	#NULL!	#NULL!	#NULL!	1	#NULL!	#NULL!		2	3	9	1	32246	0	0	0	1	1	1	4	4	4	4	4	4	4	4	3	3	#NULL!	2	6	1	0	0	0	0	0	0	0	1	0	0	0	0	0	0	3
2		4	1	#NULL!	#NULL!	#NULL!	#NULL!	#NULL!		2	3	3	1	43055	2	3	3	4	4	4	5	5	4	5	5	5	3	3	3	5	2	3	5	1	0	1	0	0	0	1	0	0	0	0	0	0	0	1	3
2		5	#NULL!	1	#NULL!	#NULL!	#NULL!	#NULL!		2	2	1	1	11213	0	0	0	3	0	0	2	4	1	2	2	2	2	4	2	2	#NULL!	1	1	0	0	1	0	0	0	0	0	0	0	1	0	0	0	0	3
2		4	1	#NULL!	1	#NULL!	#NULL!	#NULL!		1	2	6	1	11385	2	2	1	2	3	2	4	4	4	5	5	5	4	4	3	4	#NULL!	1	6	1	0	0	0	0	0	0	0	0	0	0	1	0	0	0	3
2		3	1	#NULL!	#NULL!	#NULL!	#NULL!	#NULL!		2	2	7	1	11209	2	1	3	4	4	3	5	5	5	5	5	5	4	4	4	4	#NULL!	1	2	1	1	1	0	0	1	1	0	0	0	0	0	0	0	1	3
2		3	#NULL!	1	#NULL!	#NULL!	#NULL!	#NULL!		2	5	1	1	30904	4	3	3	2	3	4	5	4	3	5	5	5	5	4	1	1	#NULL!	3	5	1	0	1	1	1	1	1	0	0	0	0	0	0	0	1	3
2		6	1	#NULL!	#NULL!	#NULL!	#NULL!	#NULL!		2	5	2	2	59701	4	3	1	4	3	2	4	4	4	5	5	5	3	1	1	1	#NULL!	2	5	1	0	0	0	0	0	0	0	0	0	0	1	1	1	0	3
2		7	1	#NULL!	#NULL!	#NULL!	#NULL!	#NULL!		2	3	7	1	77092	2	1	2	3	2	2	2	2	2	4	4	4	3	2	2	2	2	3	6	1	0	0	0	0	0	0	0	0	0	0	0	0	0	1	3
2		6	1	#NULL!	#NULL!	#NULL!	#NULL!	#NULL!		2	4	4	2	32937	4	4	4	4	4	4	3	3	3	4	4	4	3	3	3	3	1	1	5	1	0	0	0	0	0	0	0	0	0	0	1	0	0	0	3
2		7	#NULL!	1	#NULL!	#NULL!	#NULL!	#NULL!		2	5	2	1	19904	4	4	4	4	4	4	4	3	3	5	5	5	4	3	4	3	#NULL!	2	6	1	0	0	1	0	1	0	0	0	0	0	0	0	0	1	3
[truncated: 1,084 more rows]
[truncated: 116 more columns]
